# Supplementary material for: A New Standard Genetic Map for the Laboratory Mouse
Source: Oxford University Press journal article supplement (doi:10.1534/genetics.109.105486), 2009-06-18
Supplement: 105486_si.pdf [file 105486_si.pdf]

# GENETICS

## Supporting Information

<http://www.genetics.org/cgi/content/full/genetics.109.105486/DC1>

## A New Standard Genetic Map for the Laboratory Mouse

Allison Cox, Cheryl L. Ackert-Bicknell, Beth L. Dumont, Yueming Ding,  
Jordana Tzenova Bell, Gudrun A. Brockmann, Jon E. Wergedal, Carol Bult, Beverly Paigen,  
Jonathan Flint, Shirng-Wern Tsaih, Gary A. Churchill and Karl W. Broman

Copyright © 2009 by the Genetics Society of America

DOI: 10.1534/genetics.109.105486

FIGURE S1

**1**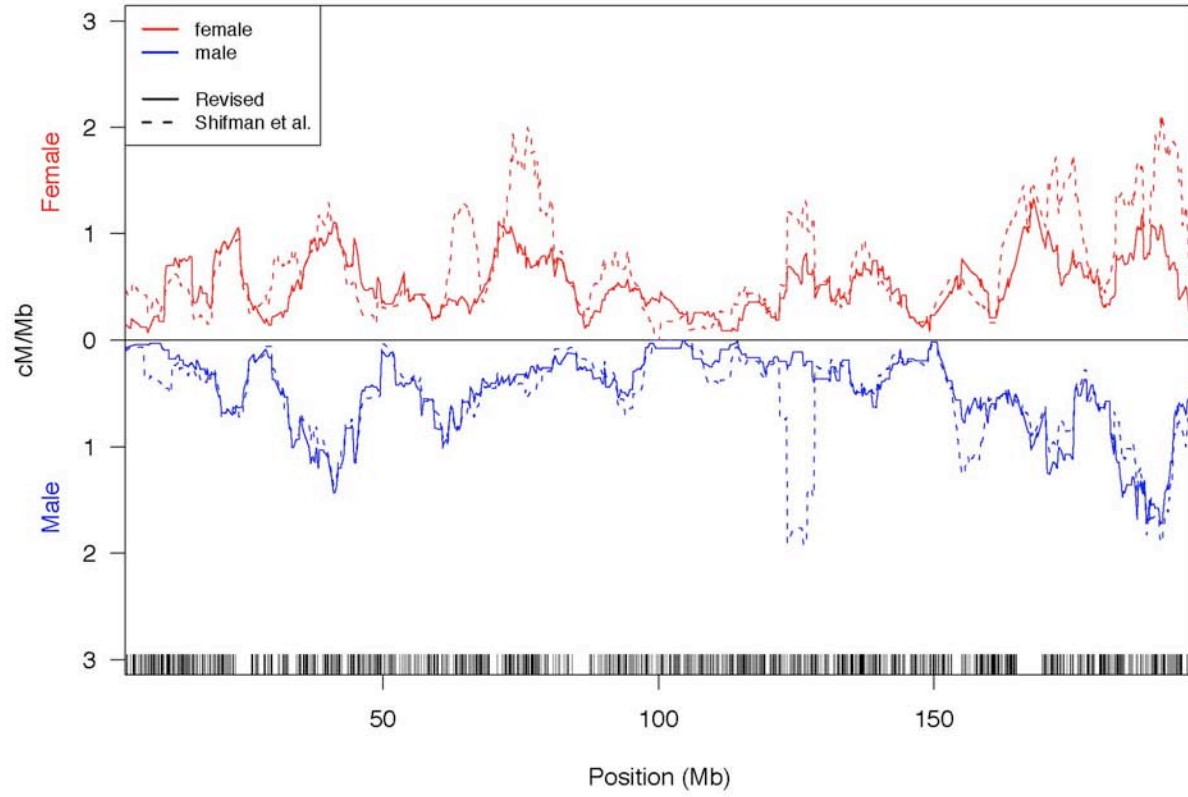

2

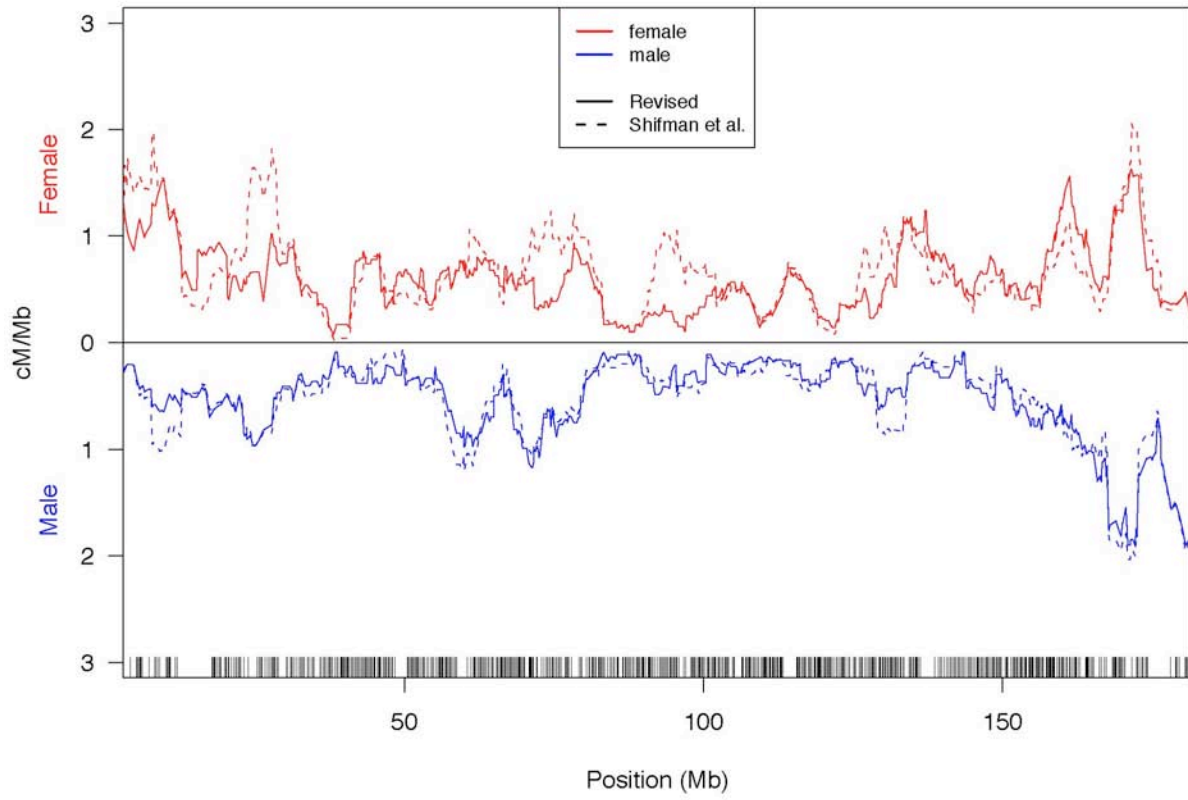

## 3

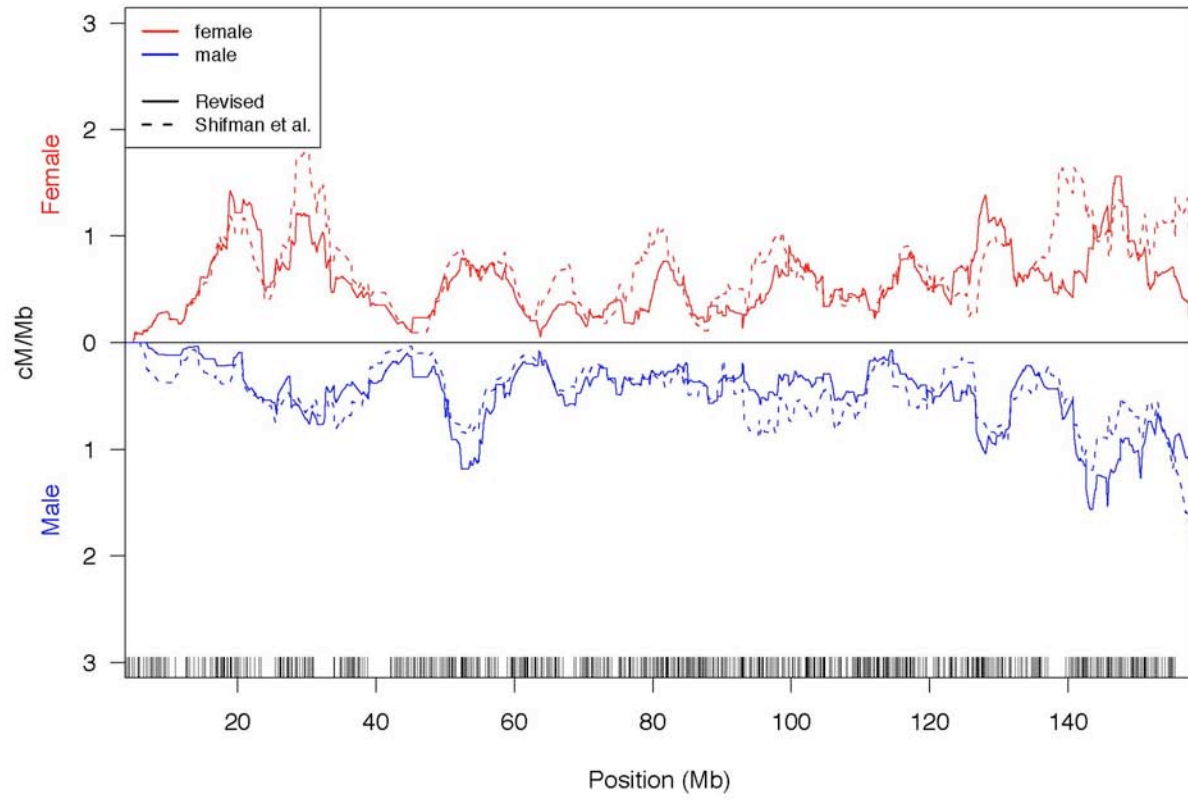

4

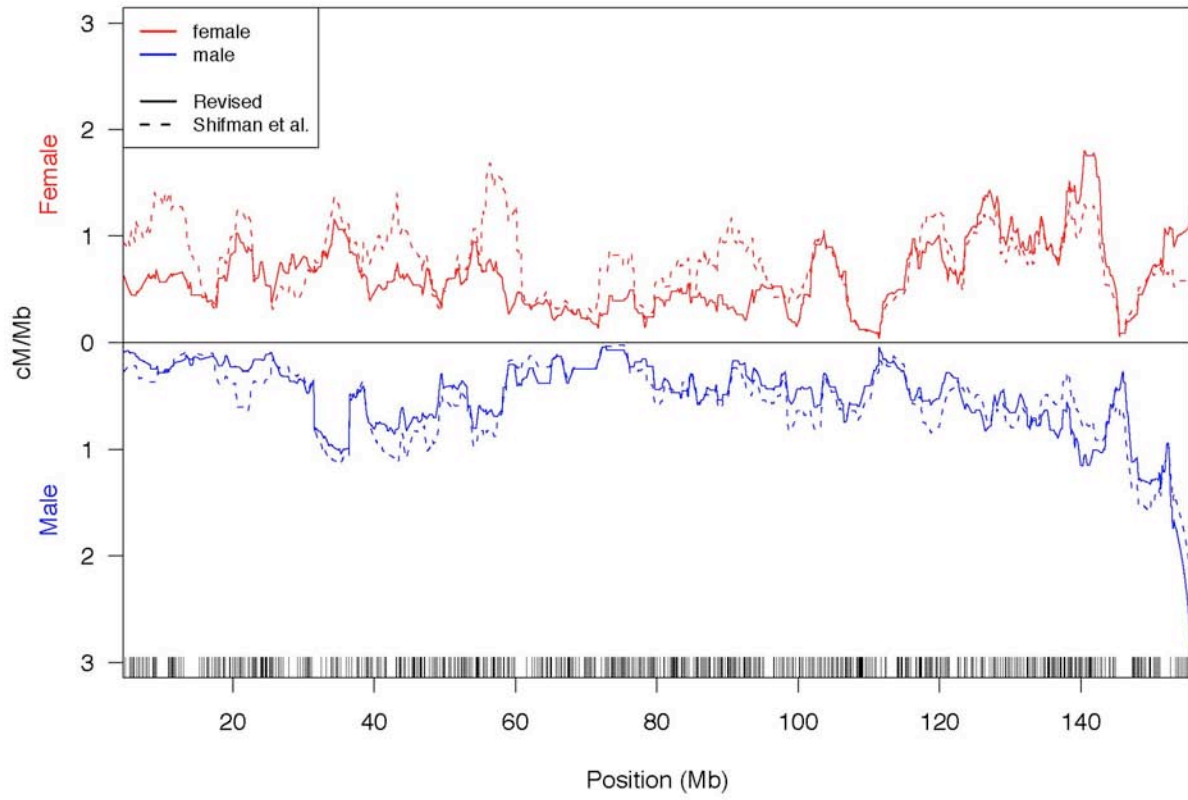

5

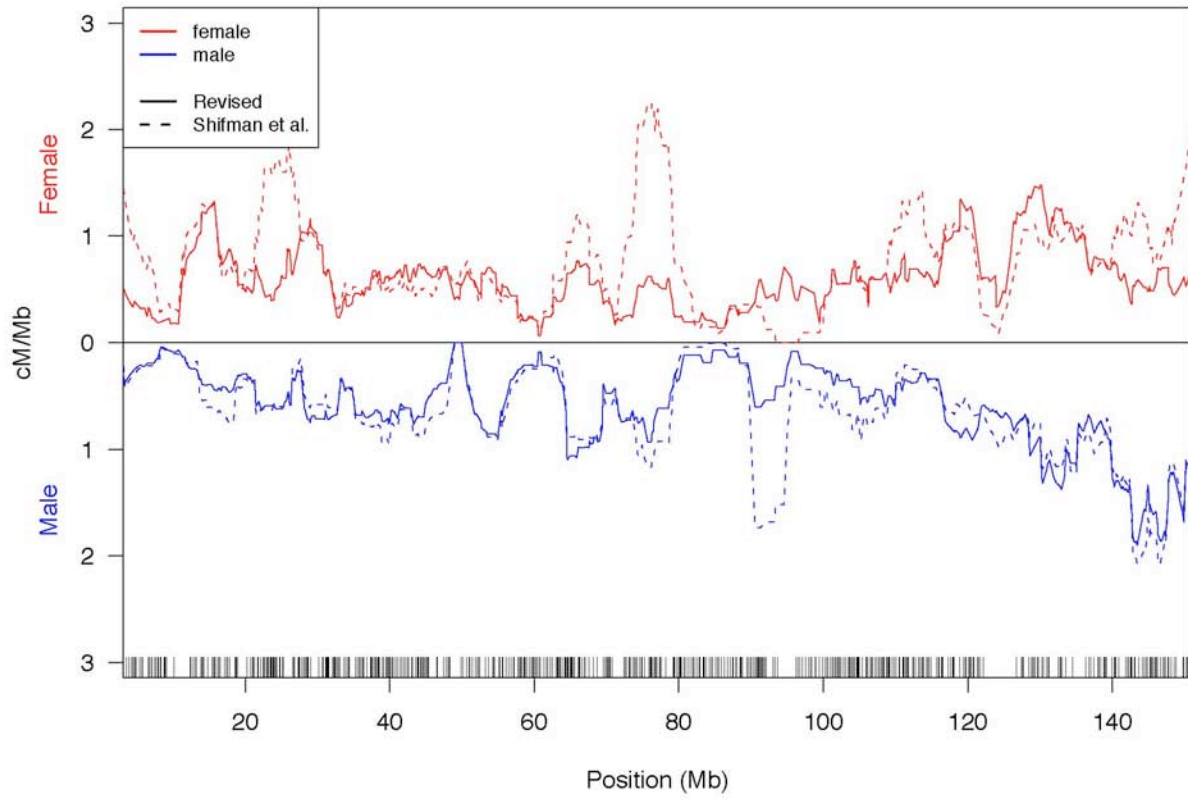

6

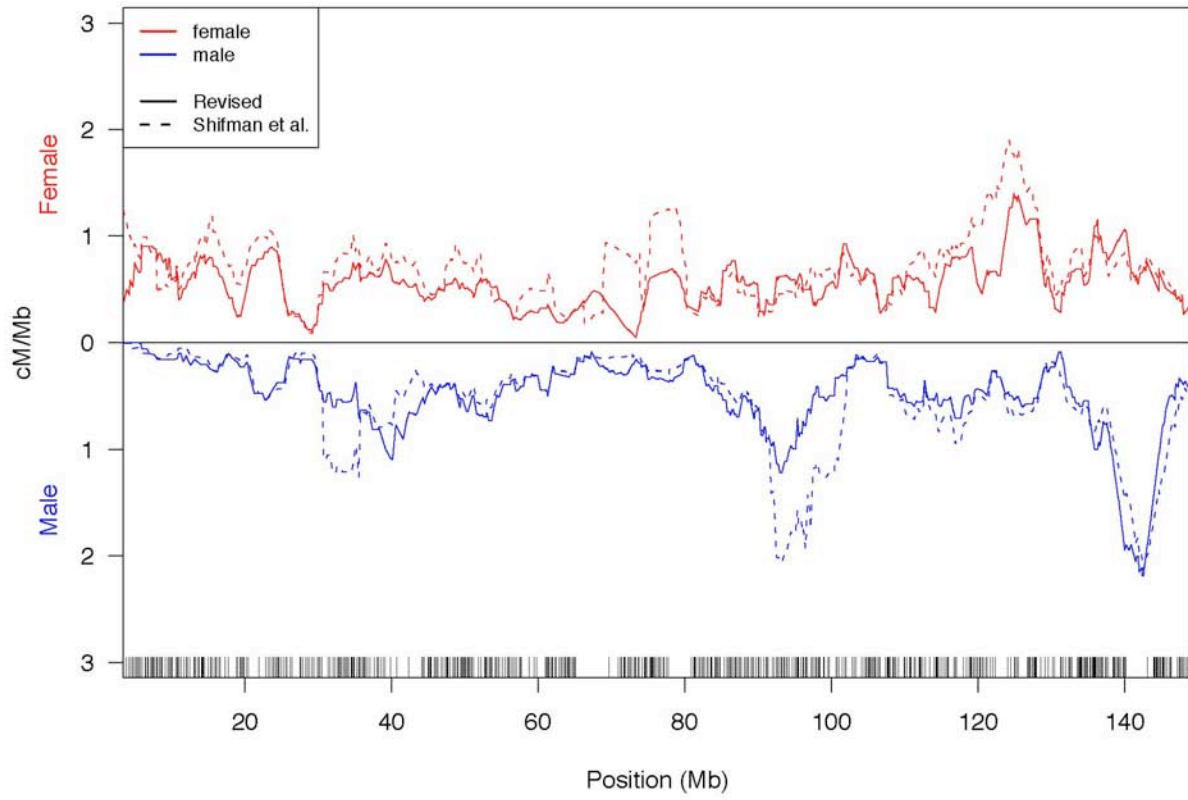

## 7

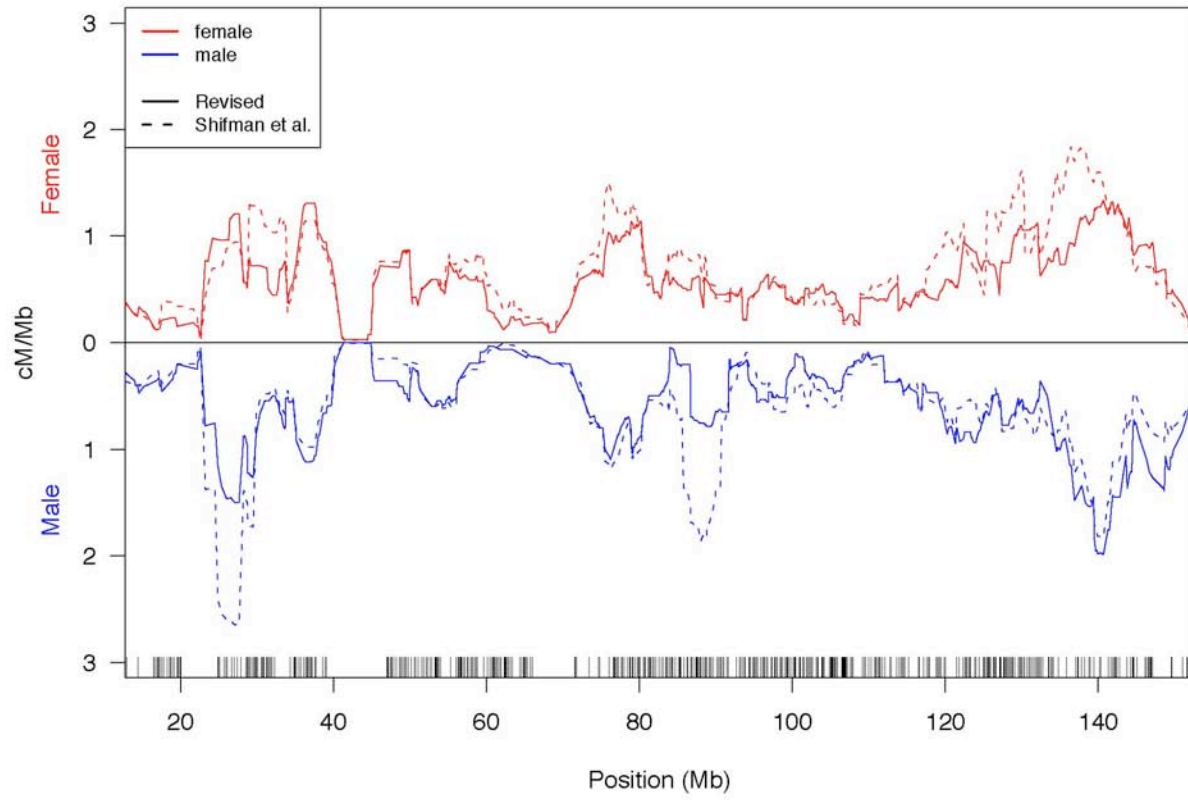



8

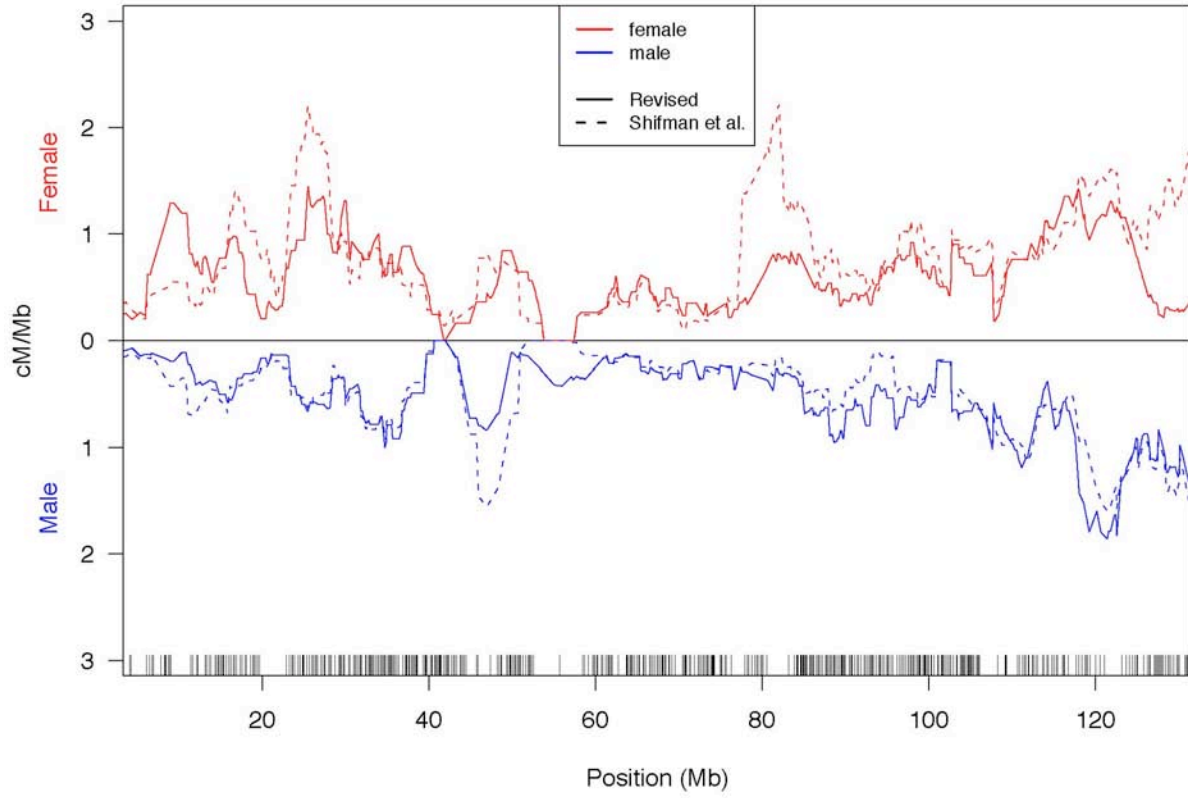

9

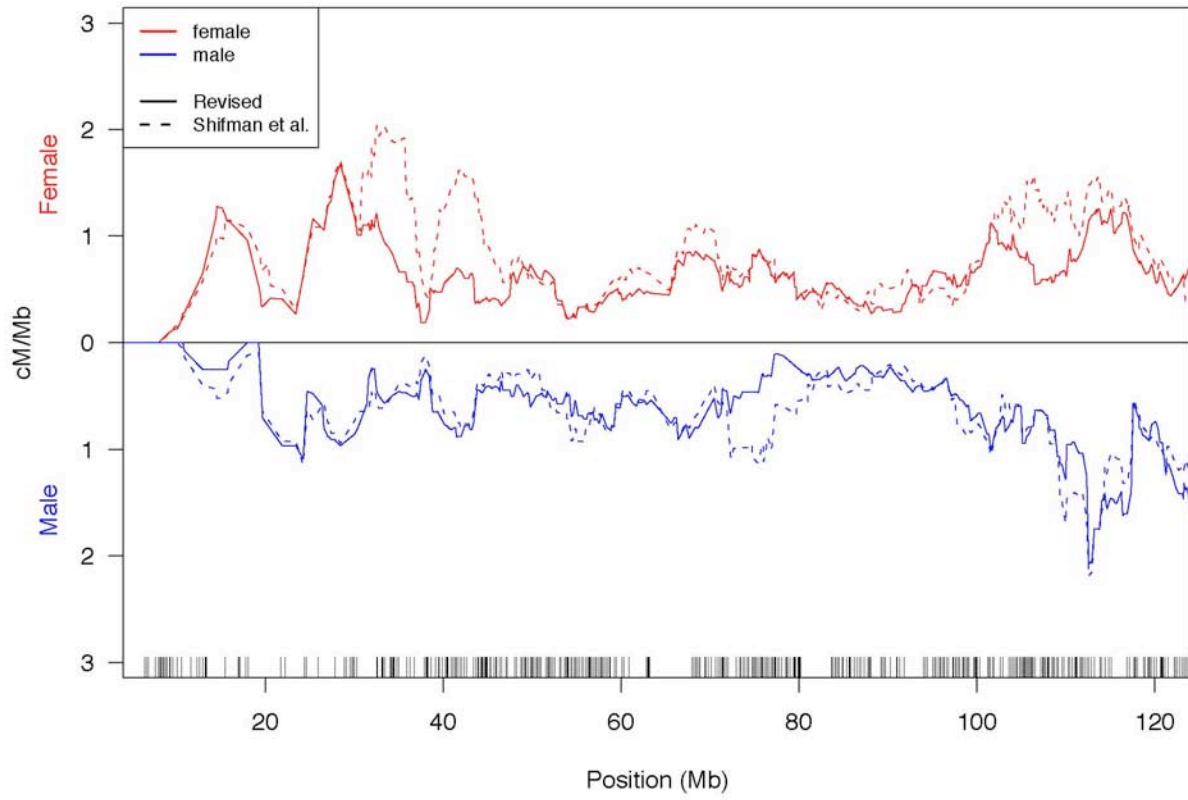

10

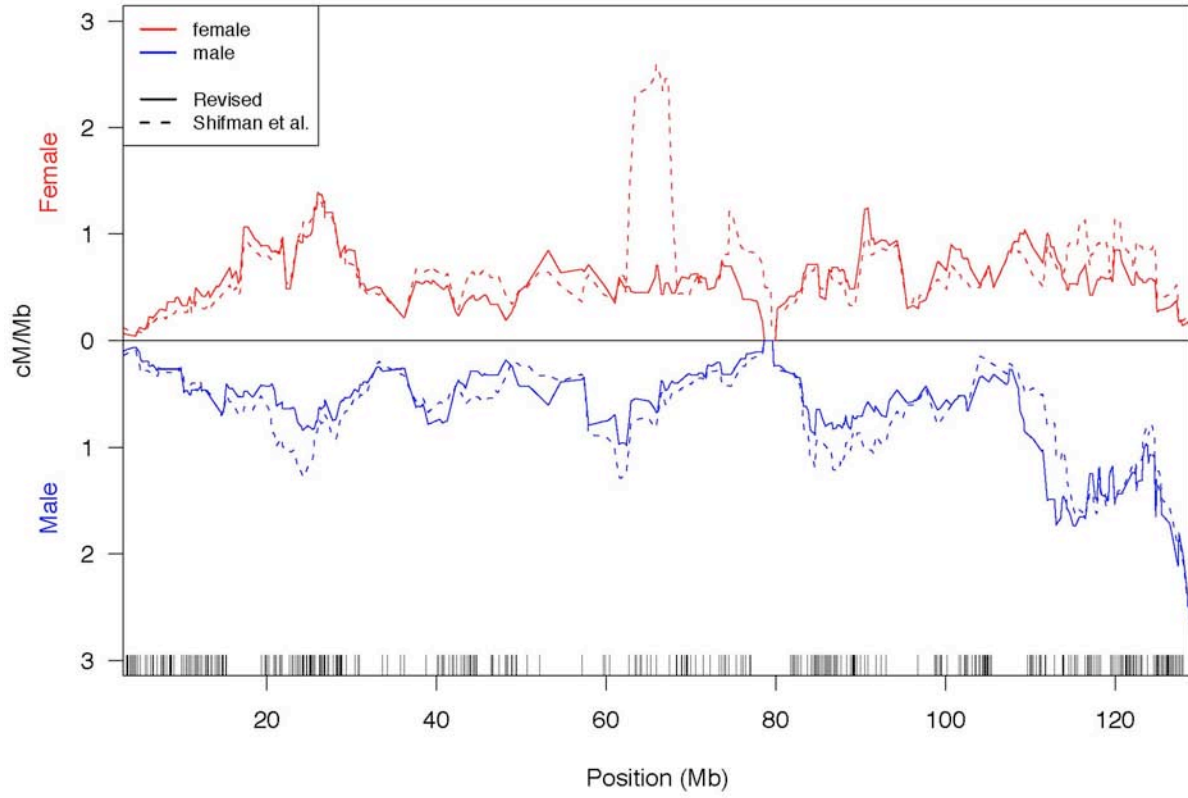

## 11

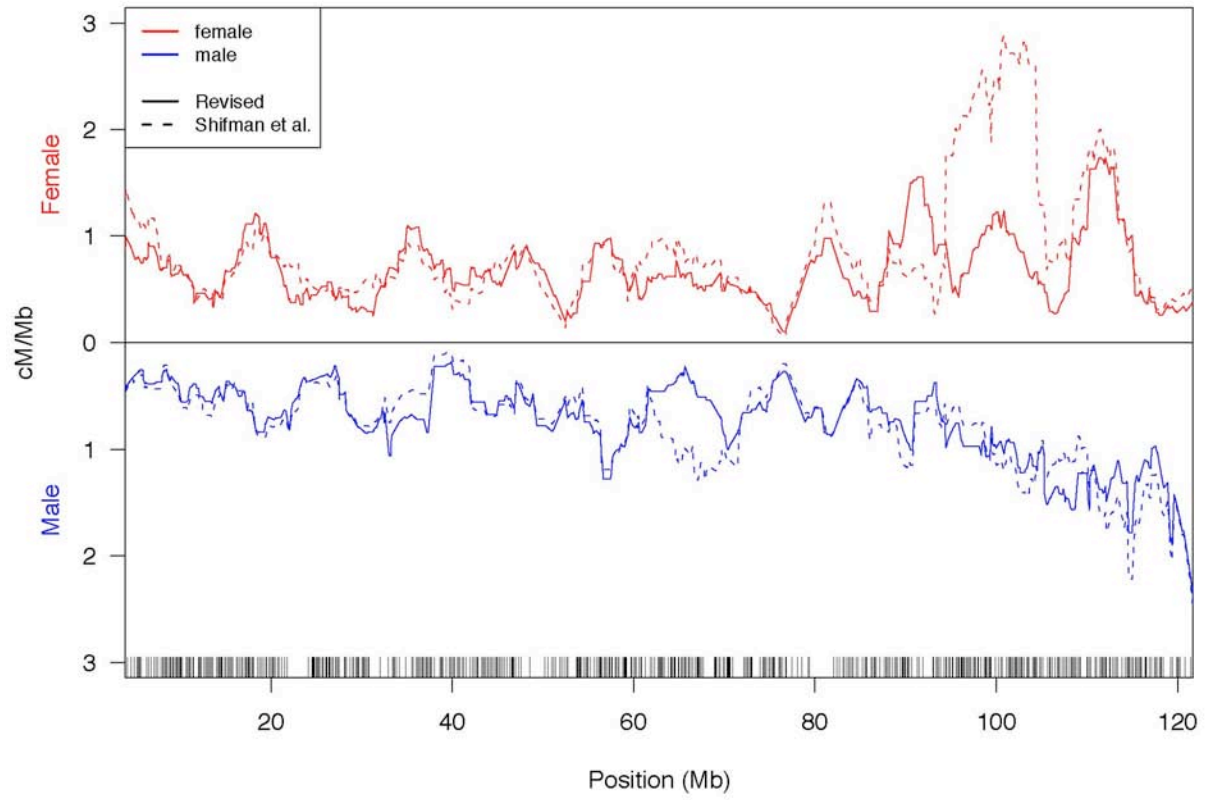

12

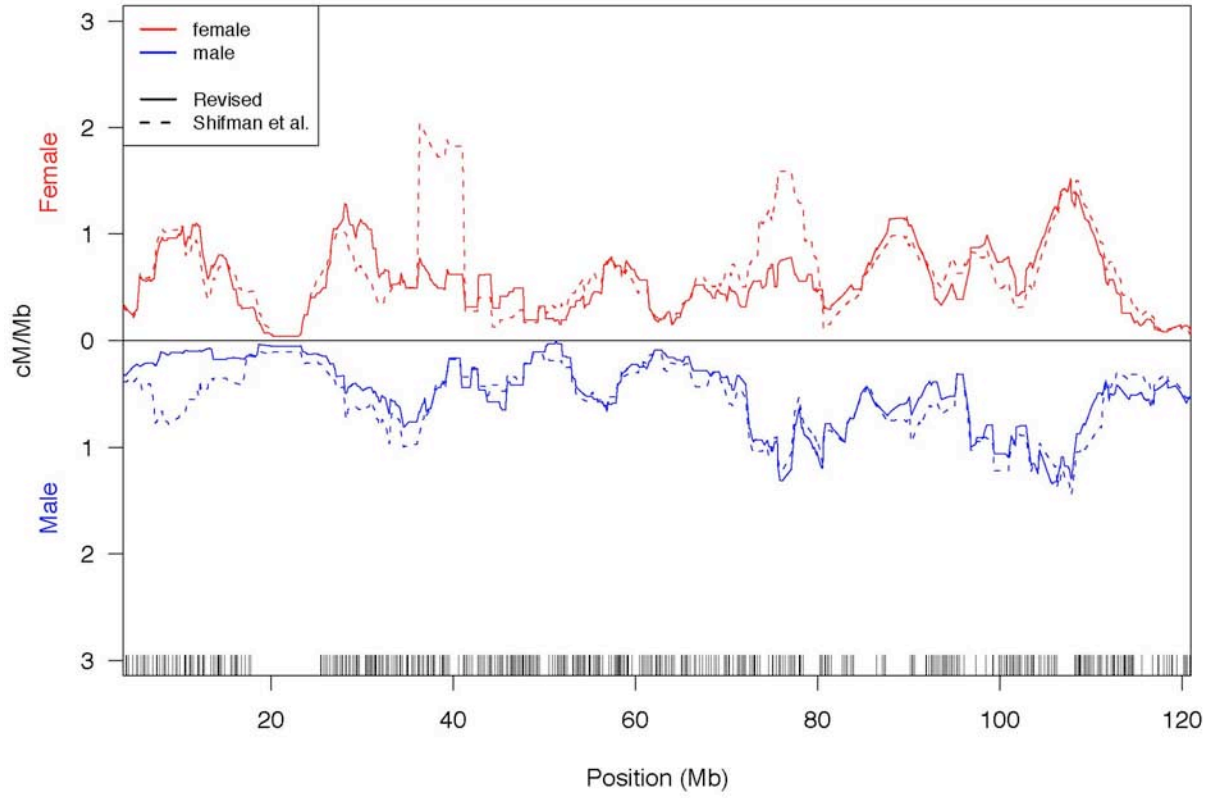

## 13

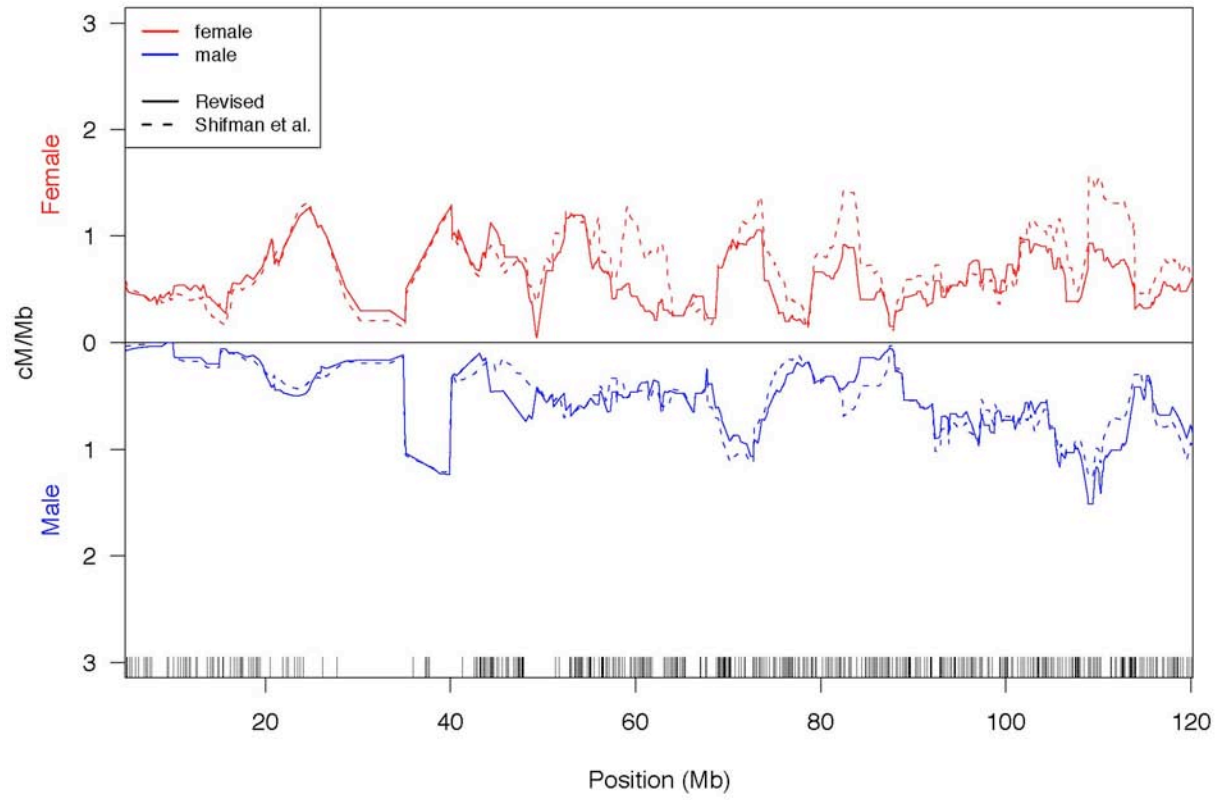

14

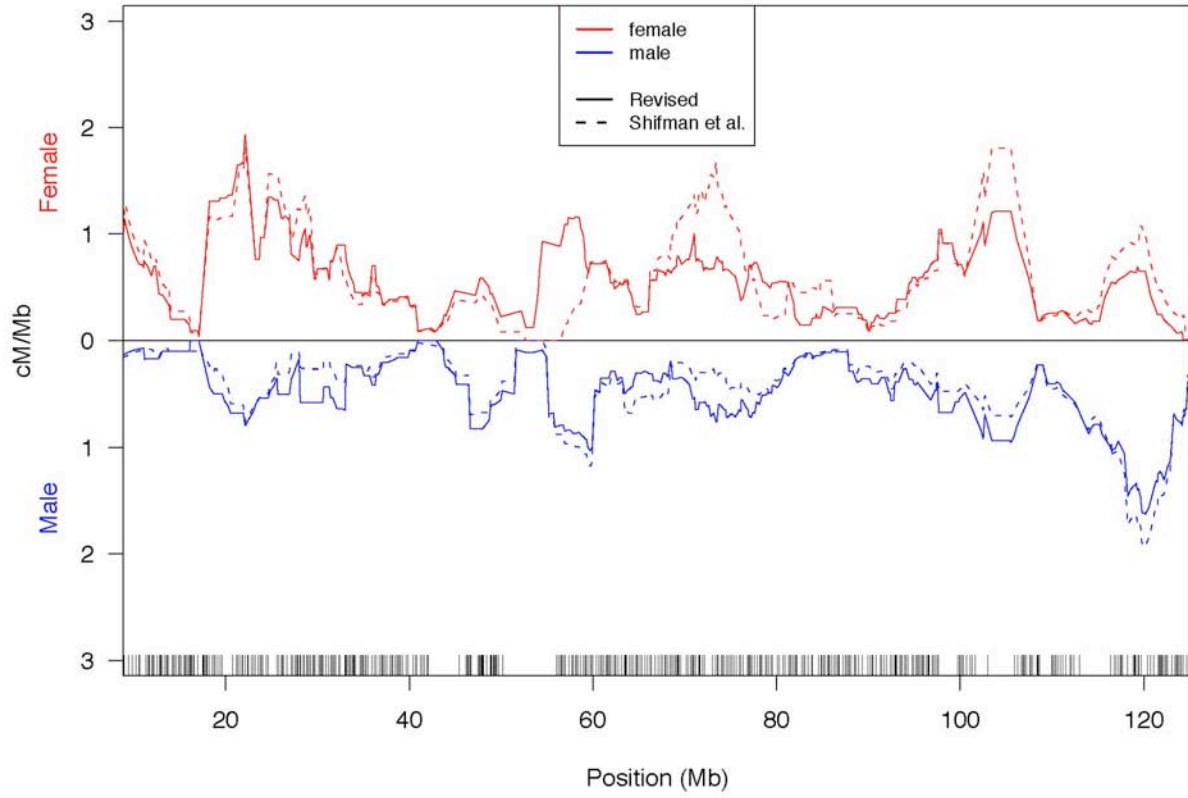

15

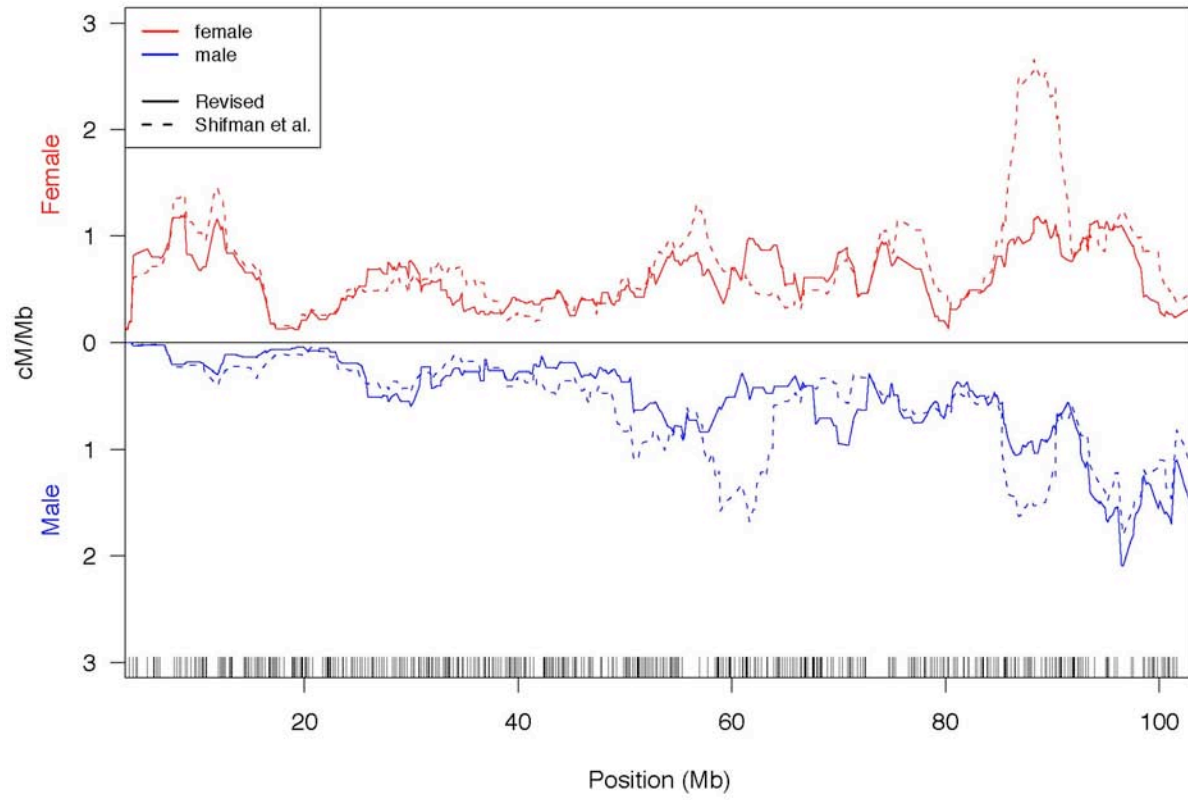



16

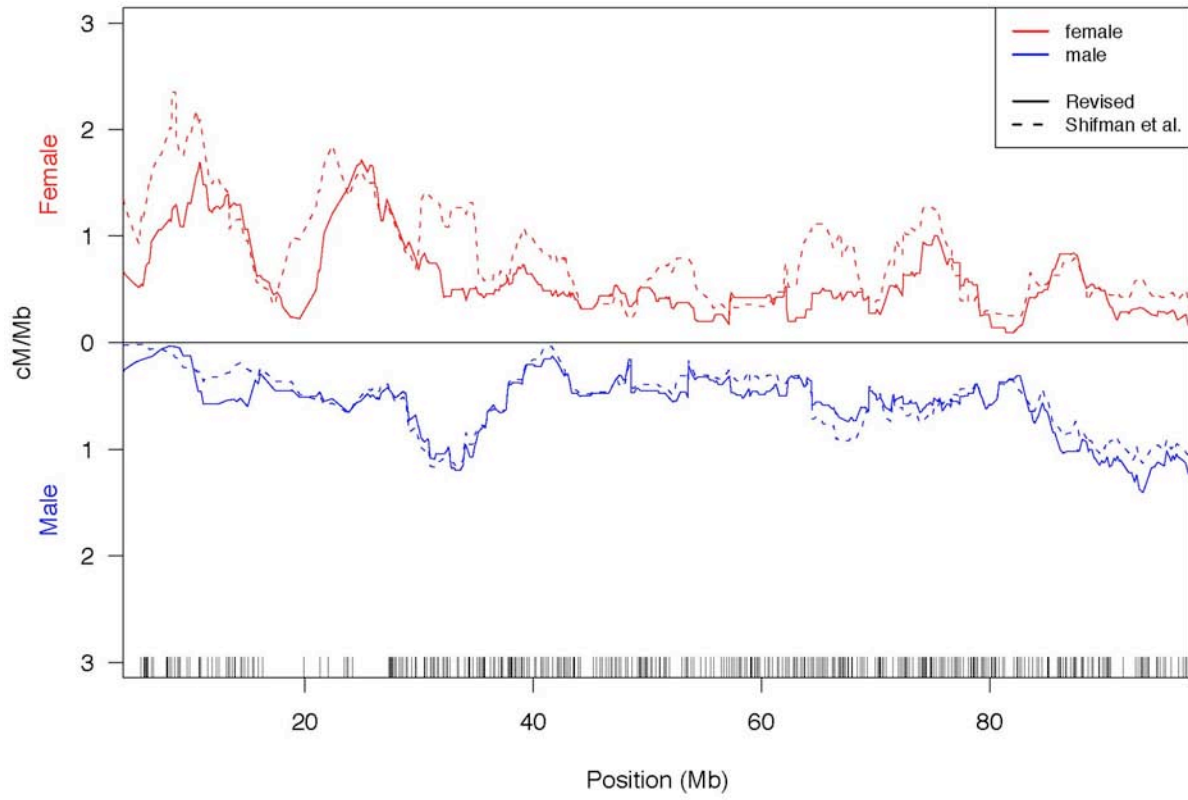

17

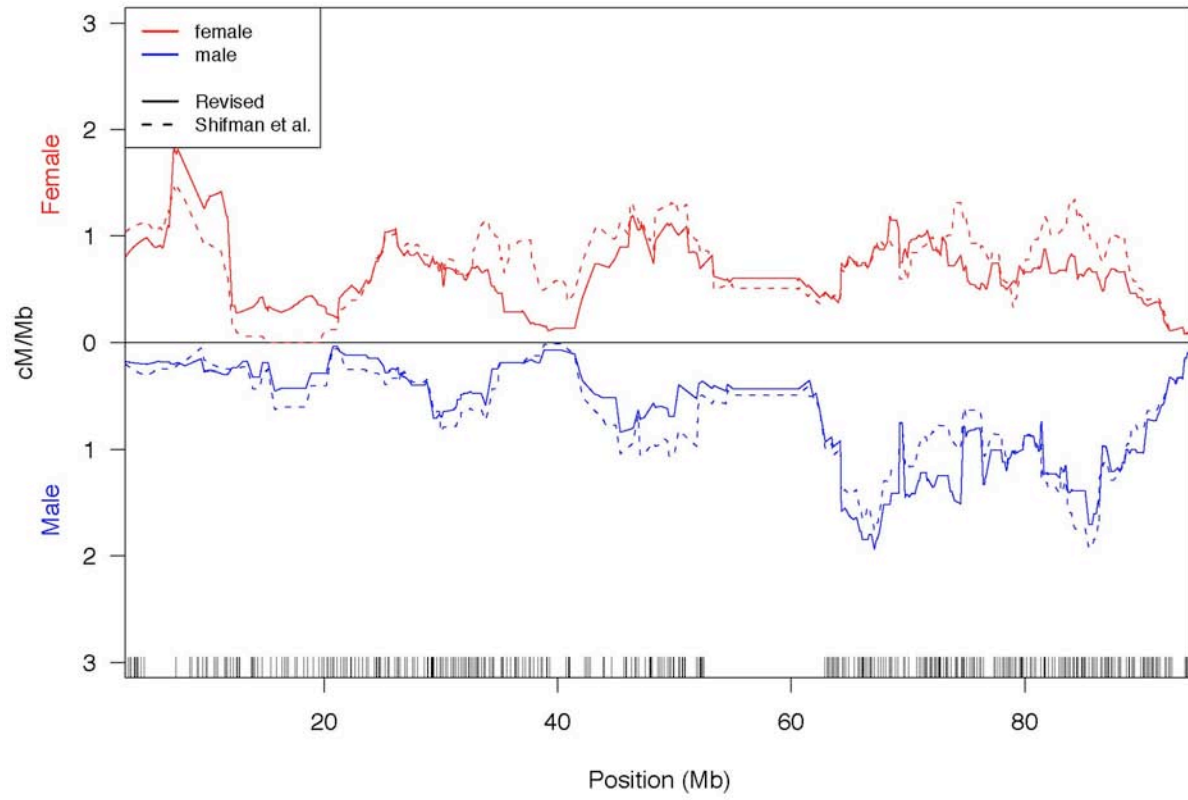

18

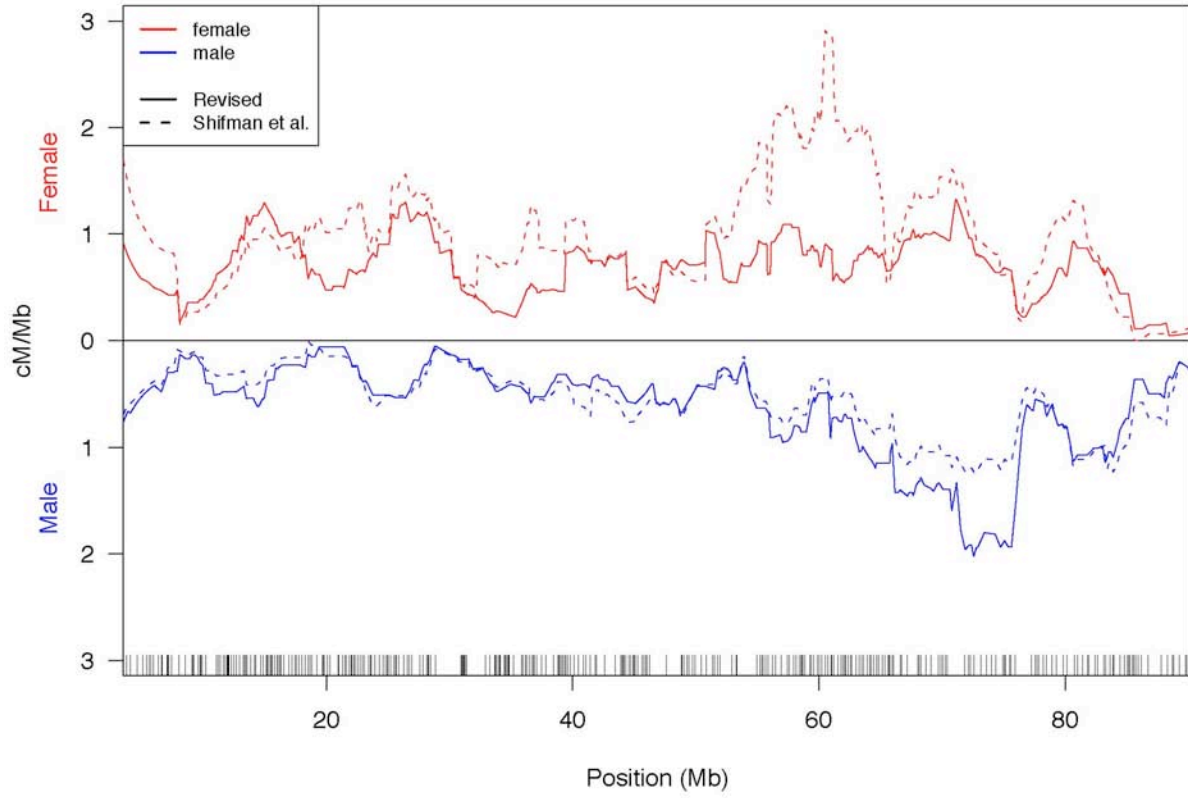

19

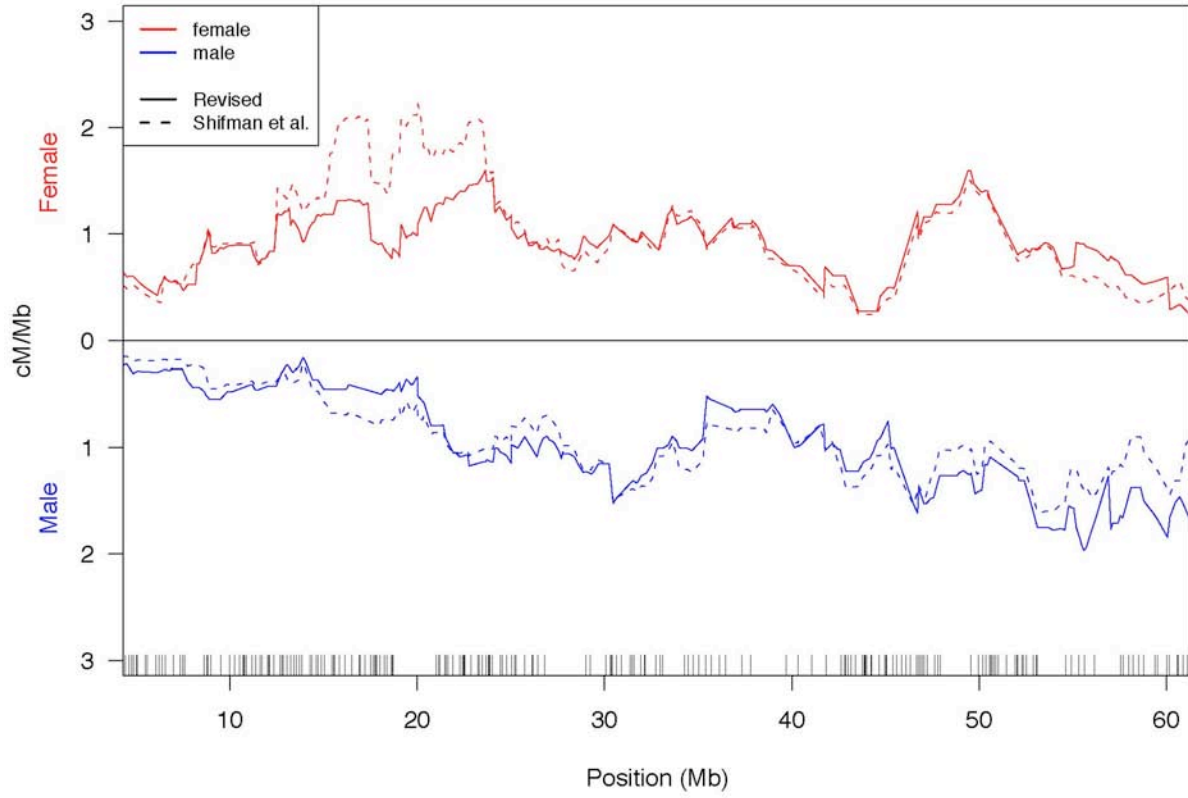

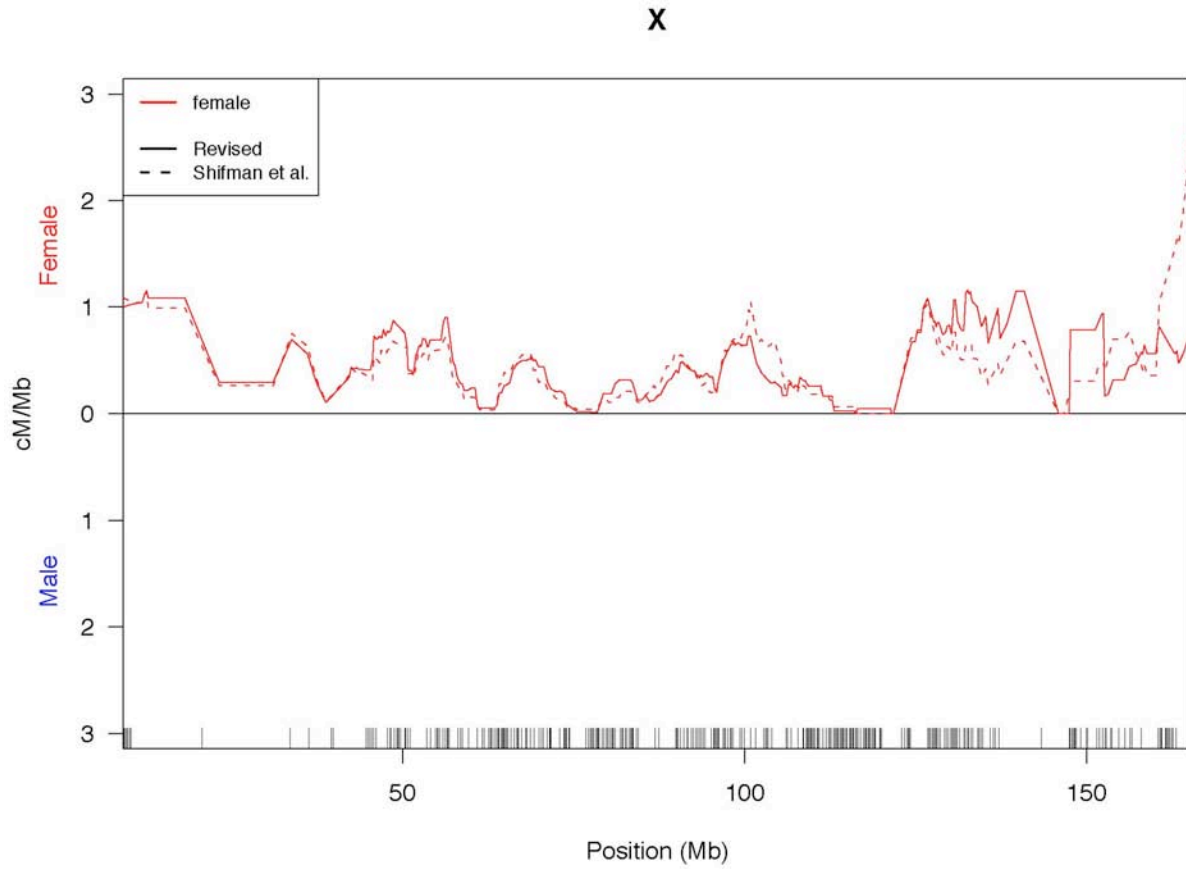

FIGURE S1.— Recombination rates in the original and revised genetic maps. Sex-specific recombination rates for the original and revised genetic maps of all Chromosomes. Maps are based on data from Shifman *et al.*, (2006) as described in Methods.

FIGURE S2

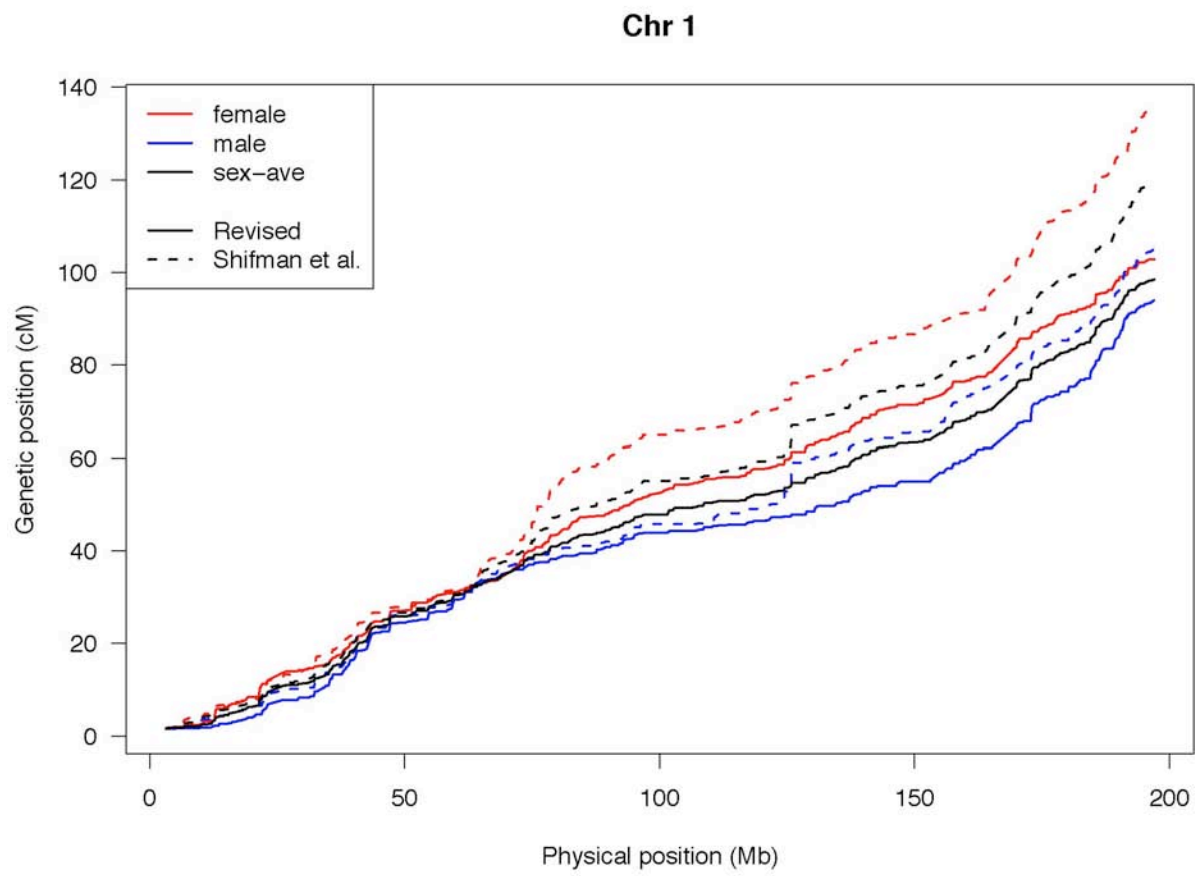

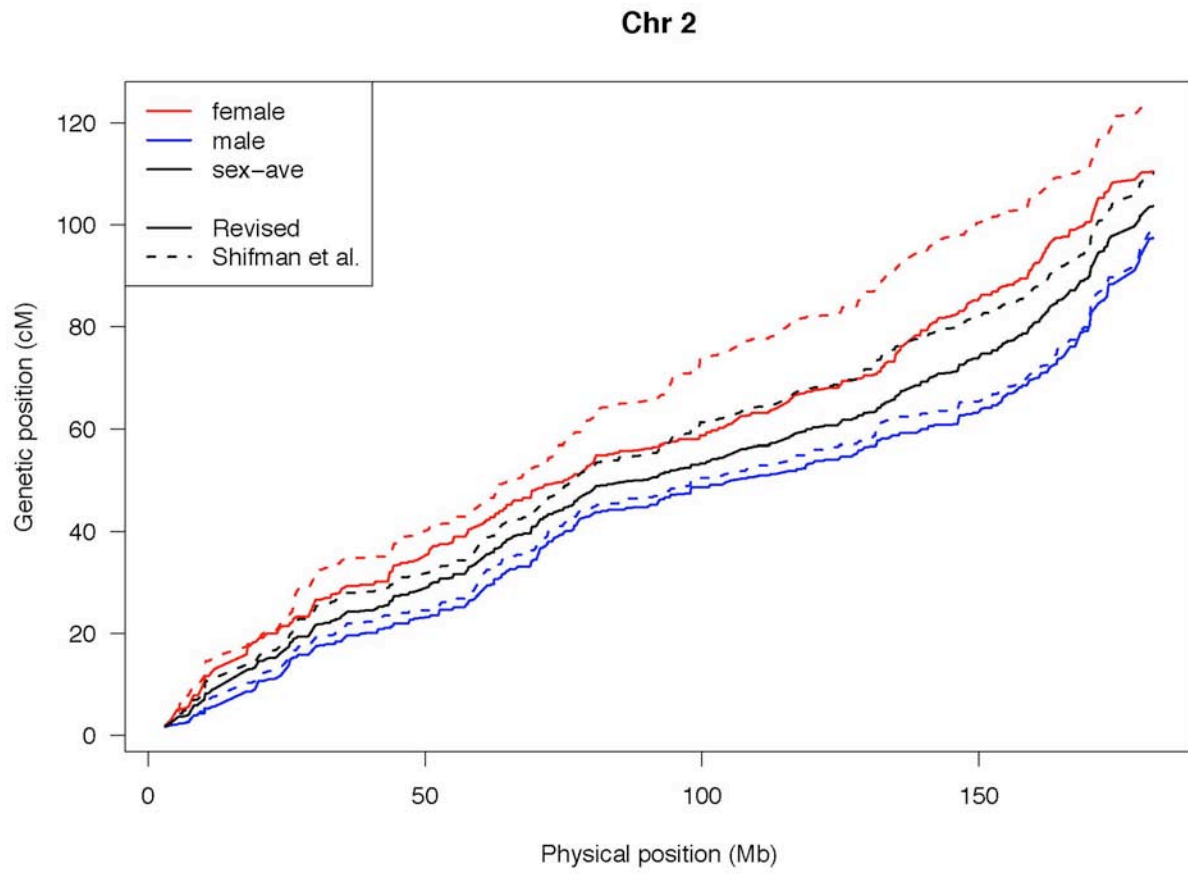

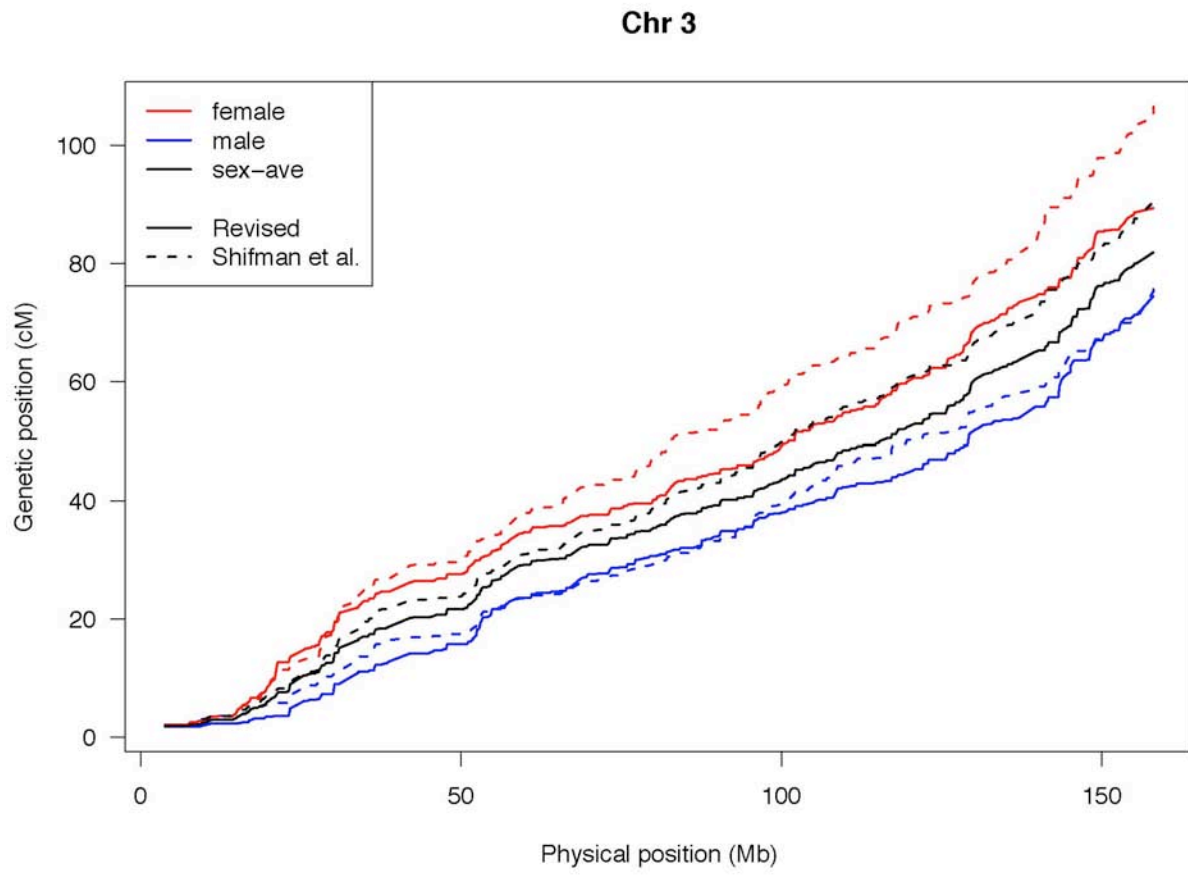



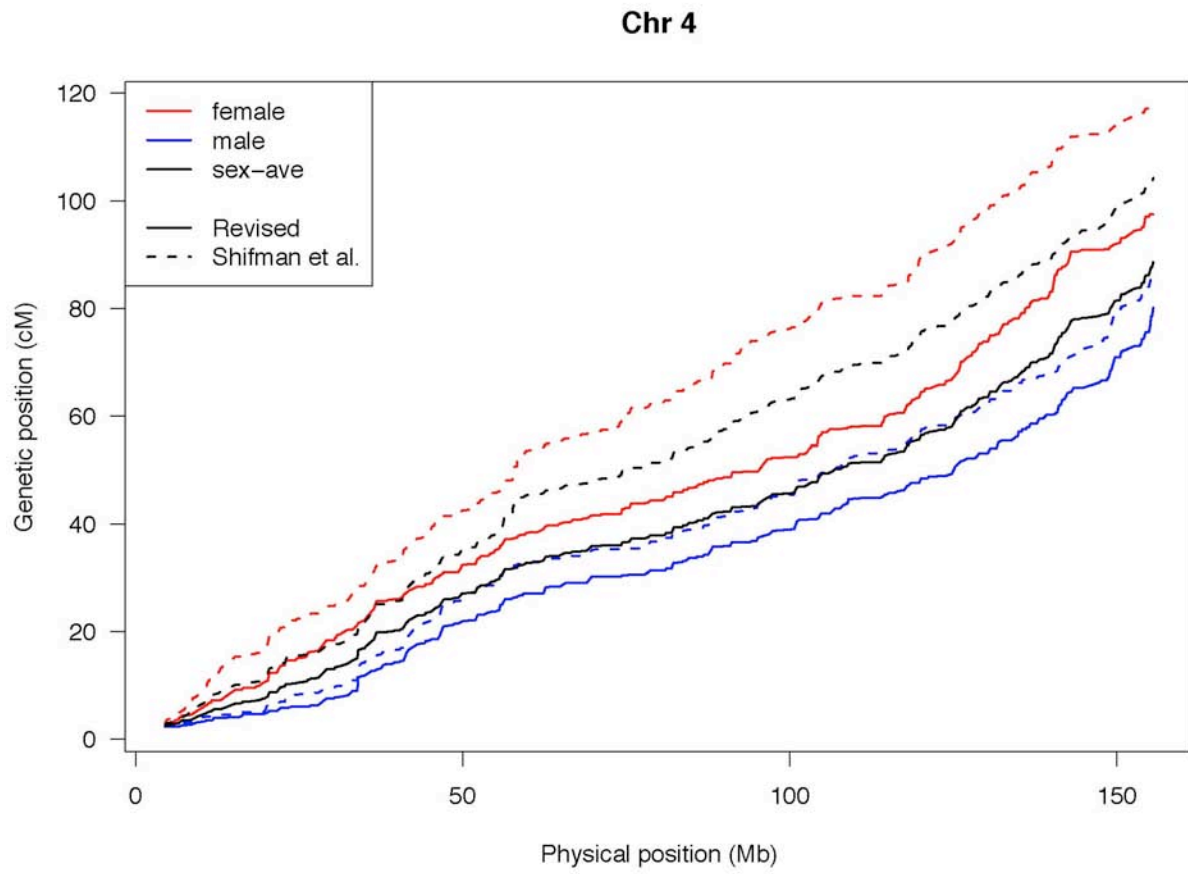

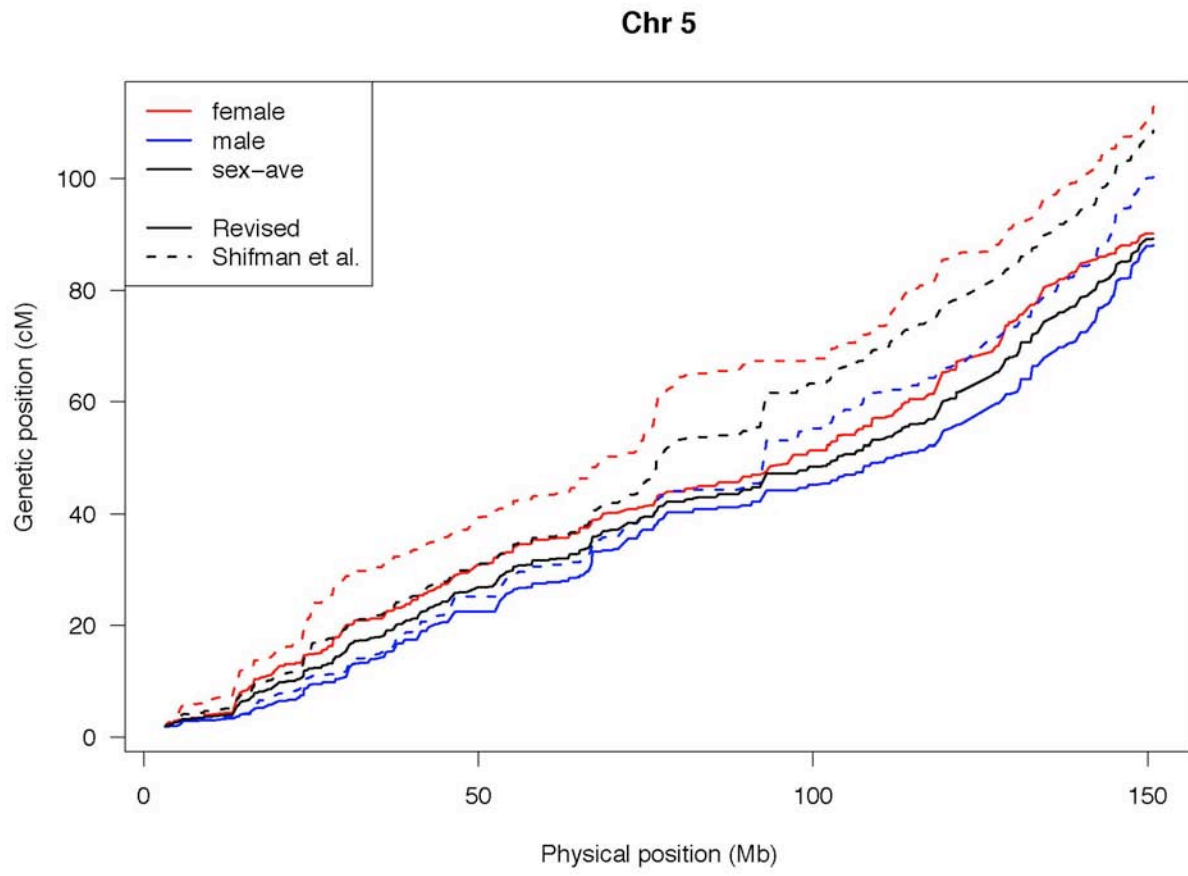

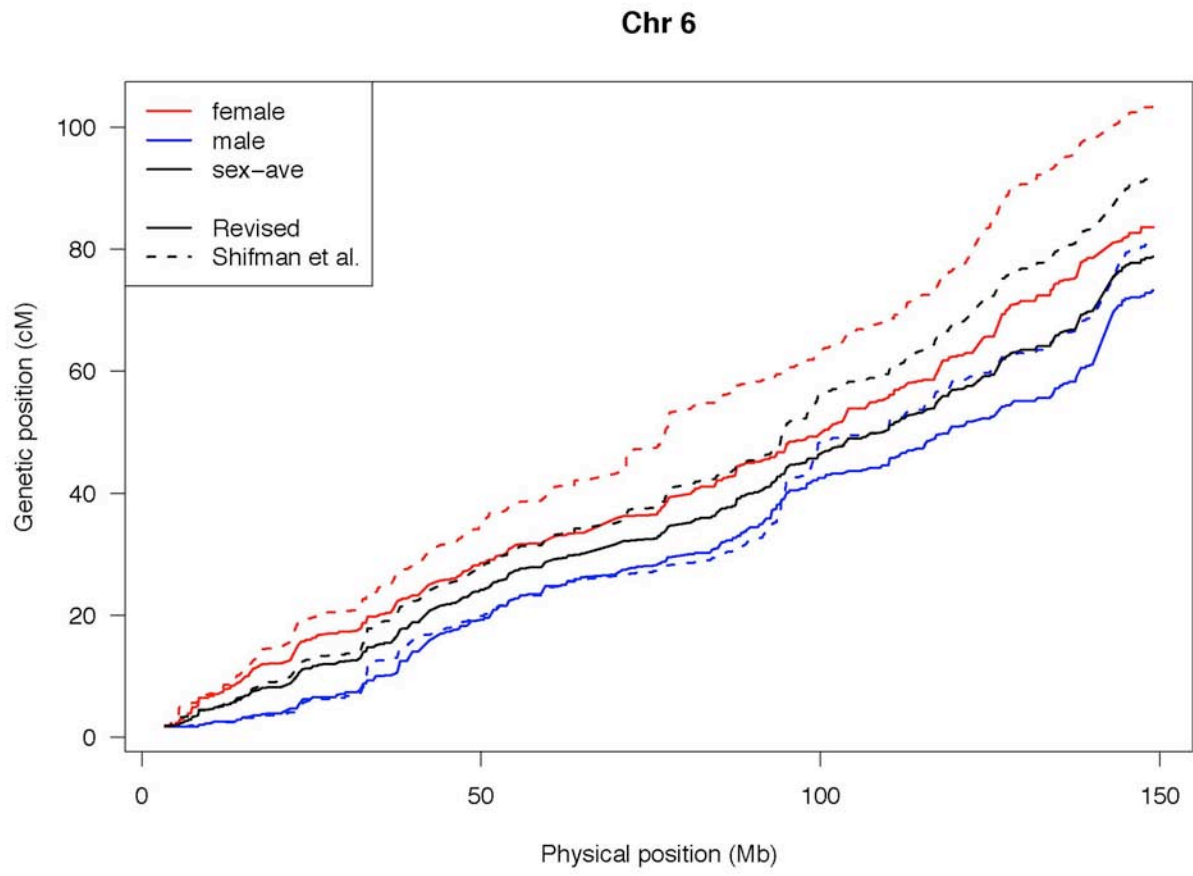

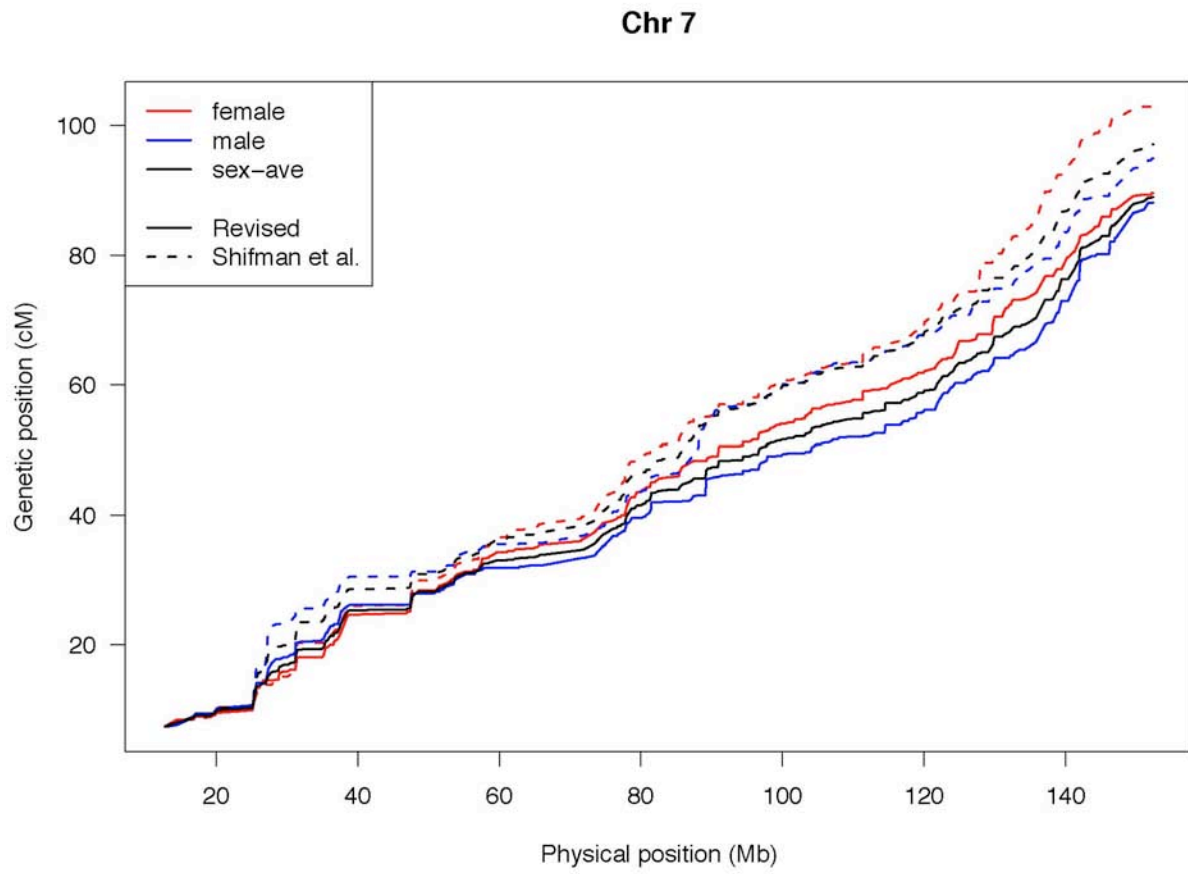

### Chr 8

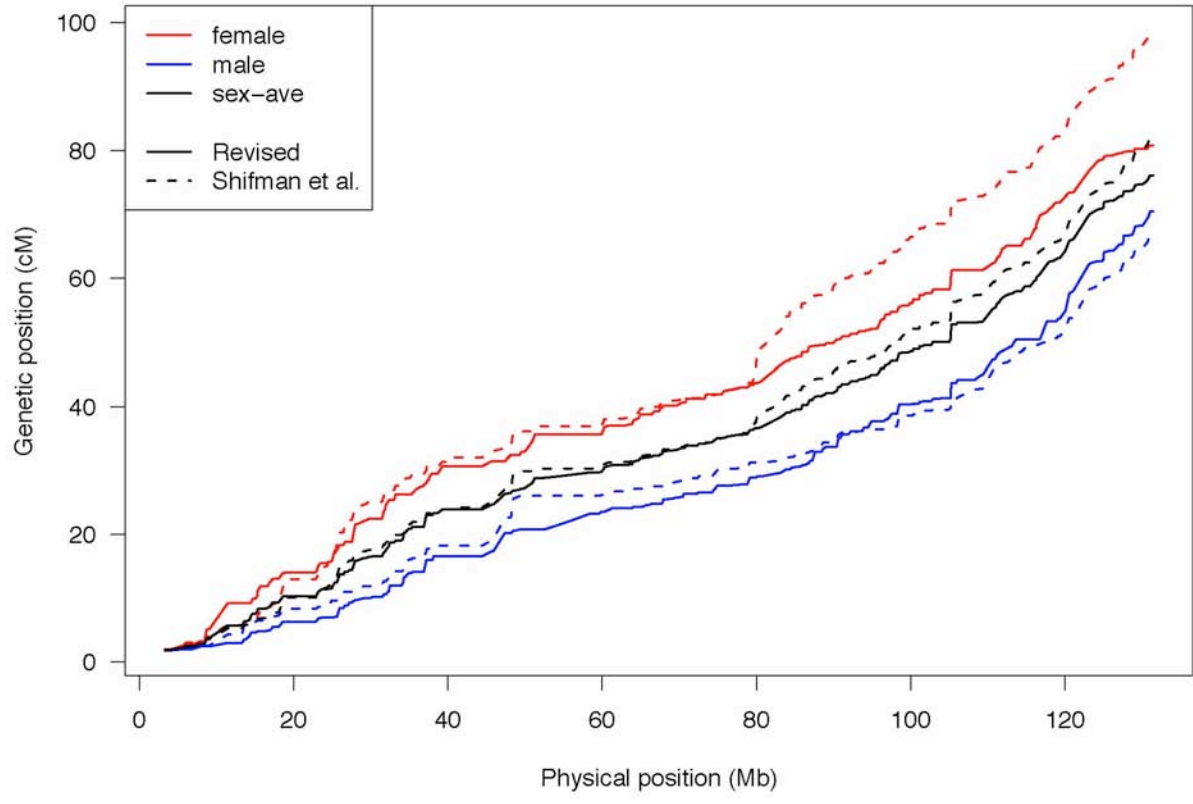

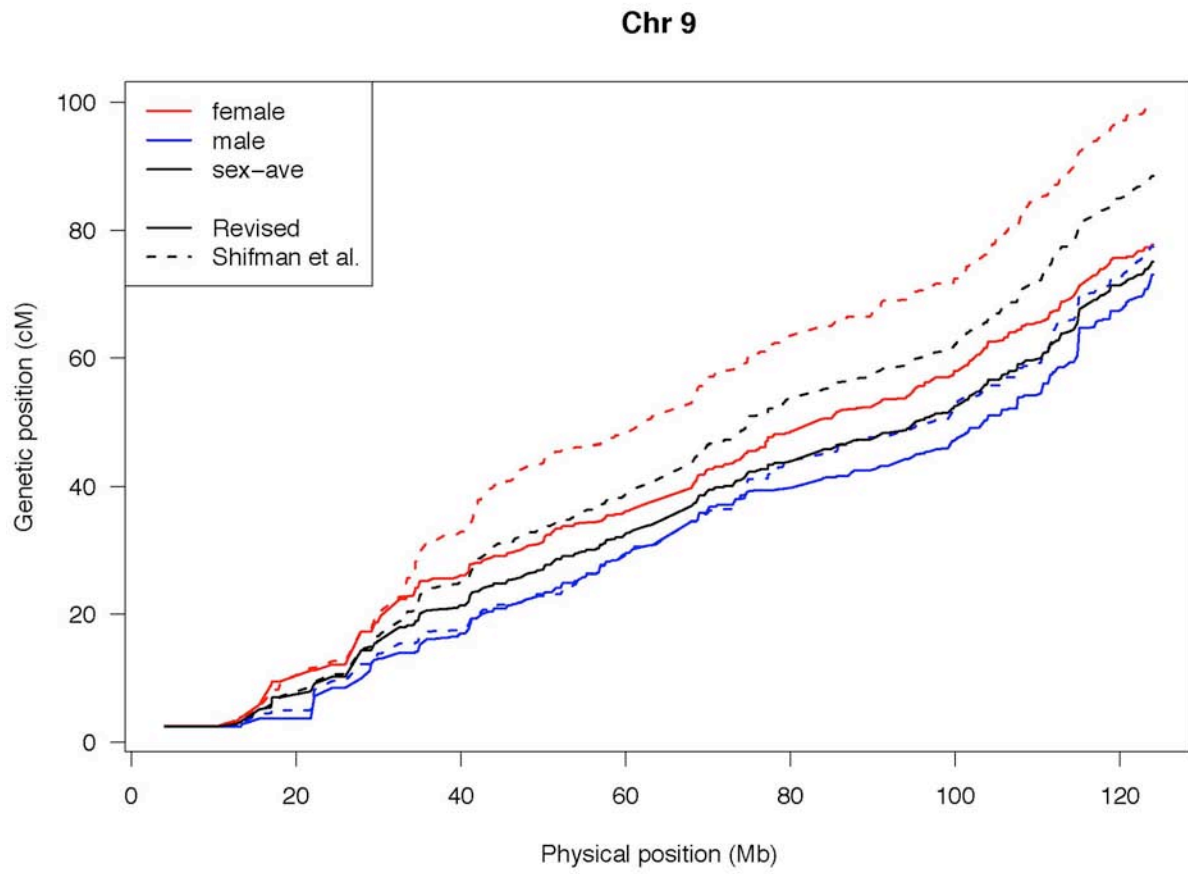

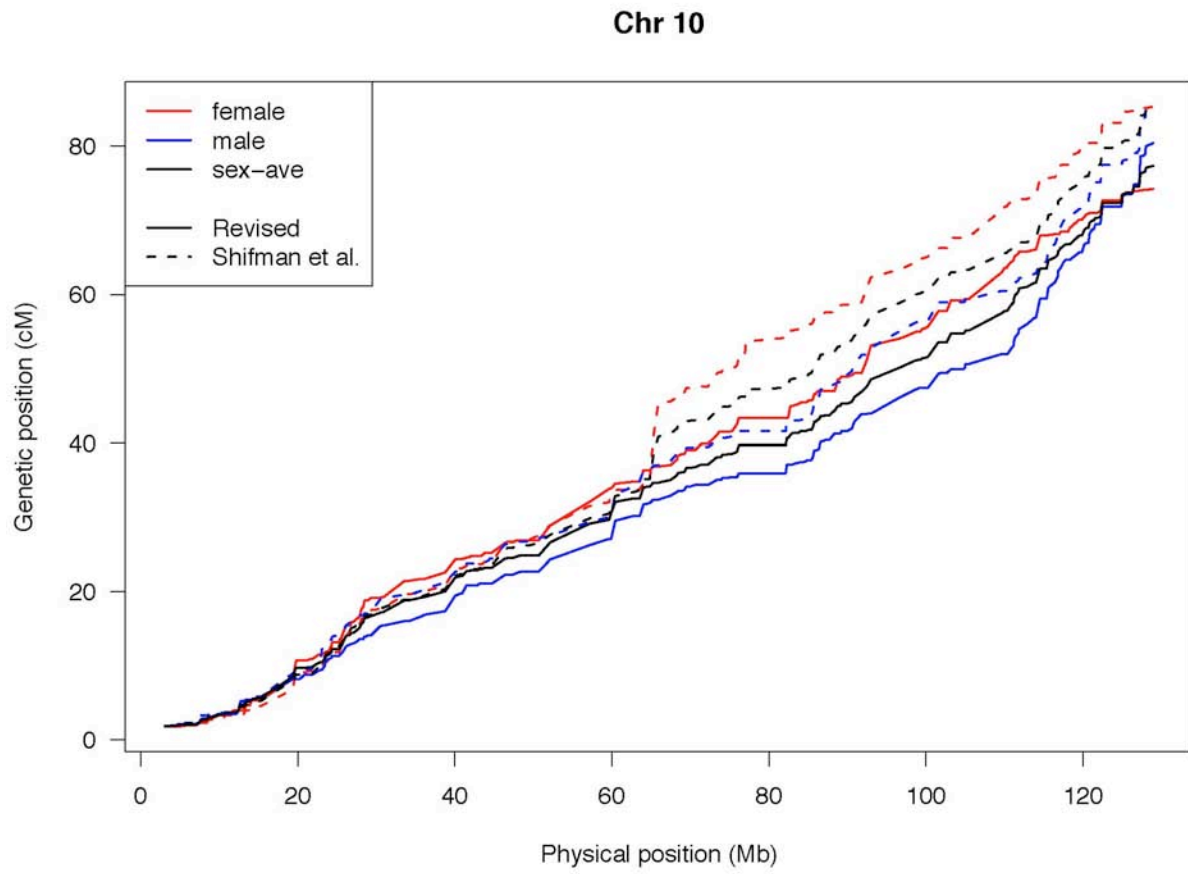

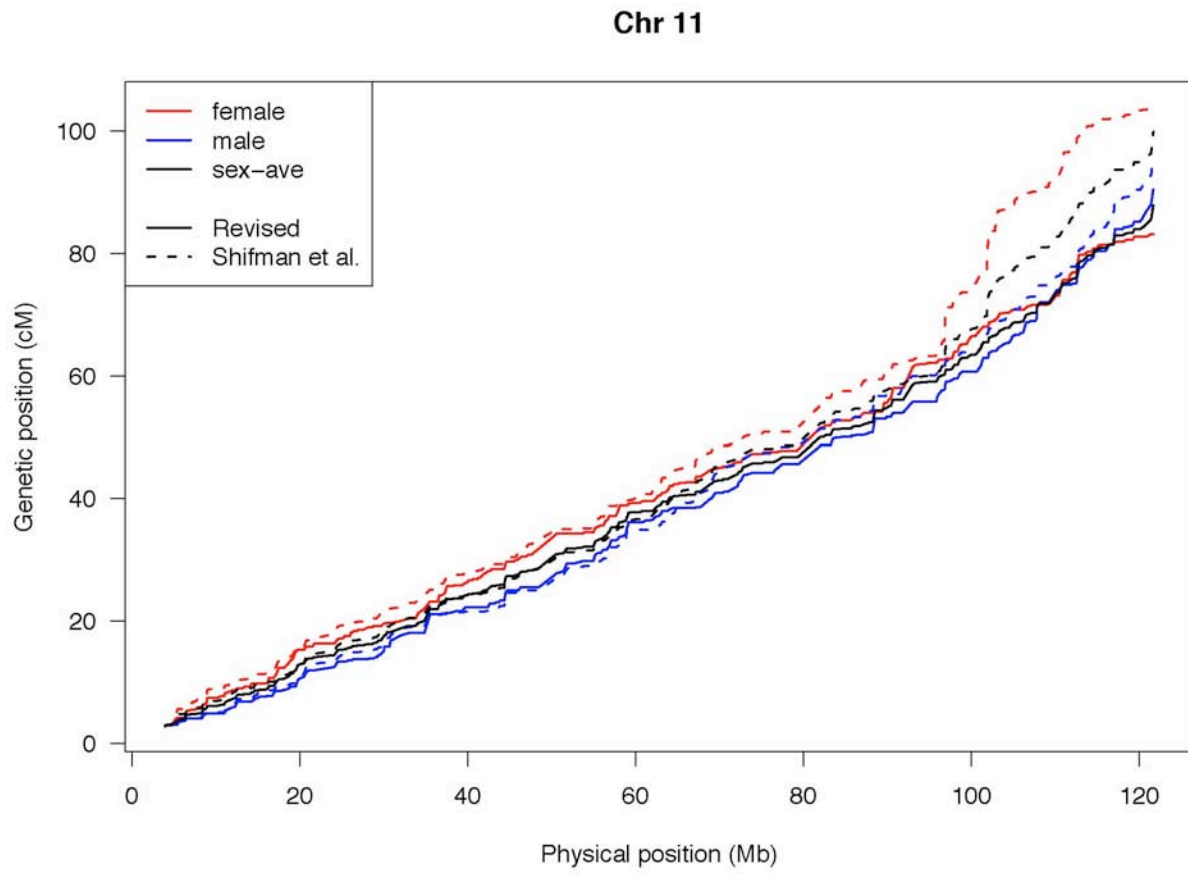



### Chr 12

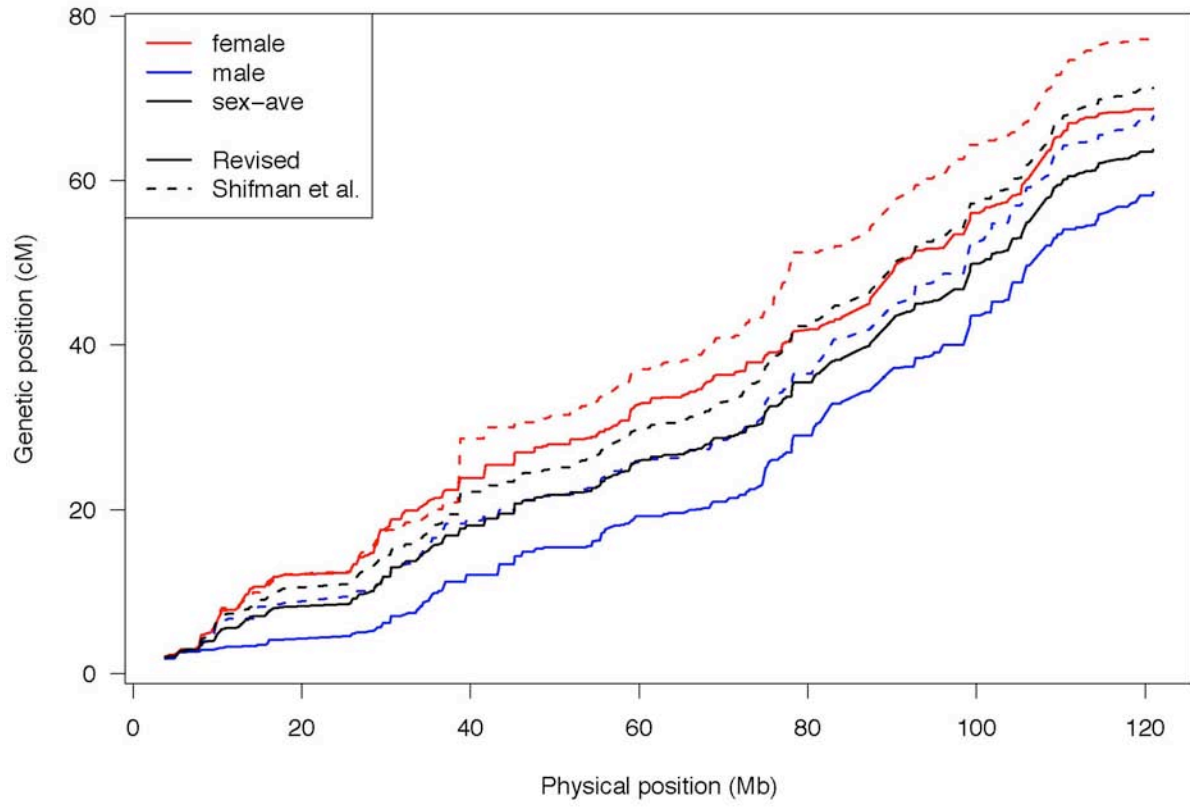

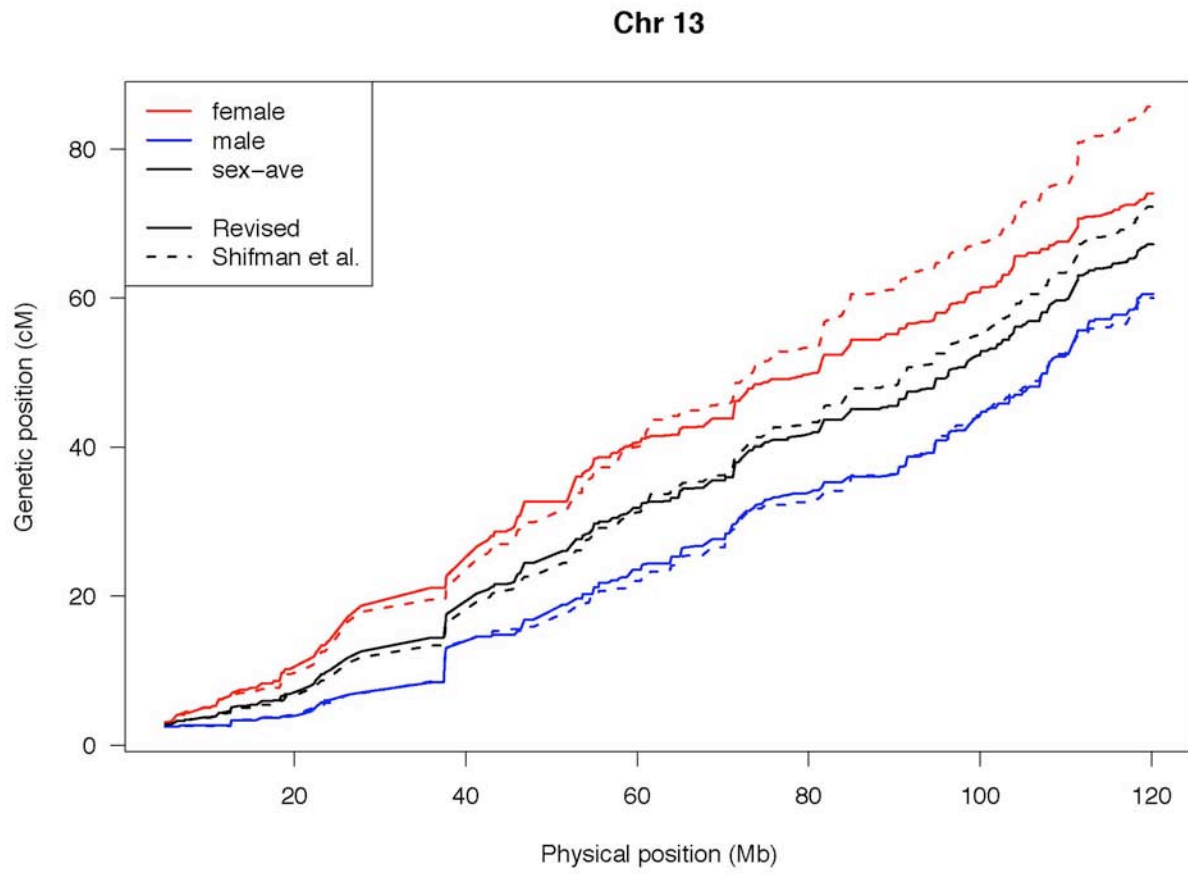

## Chr 14

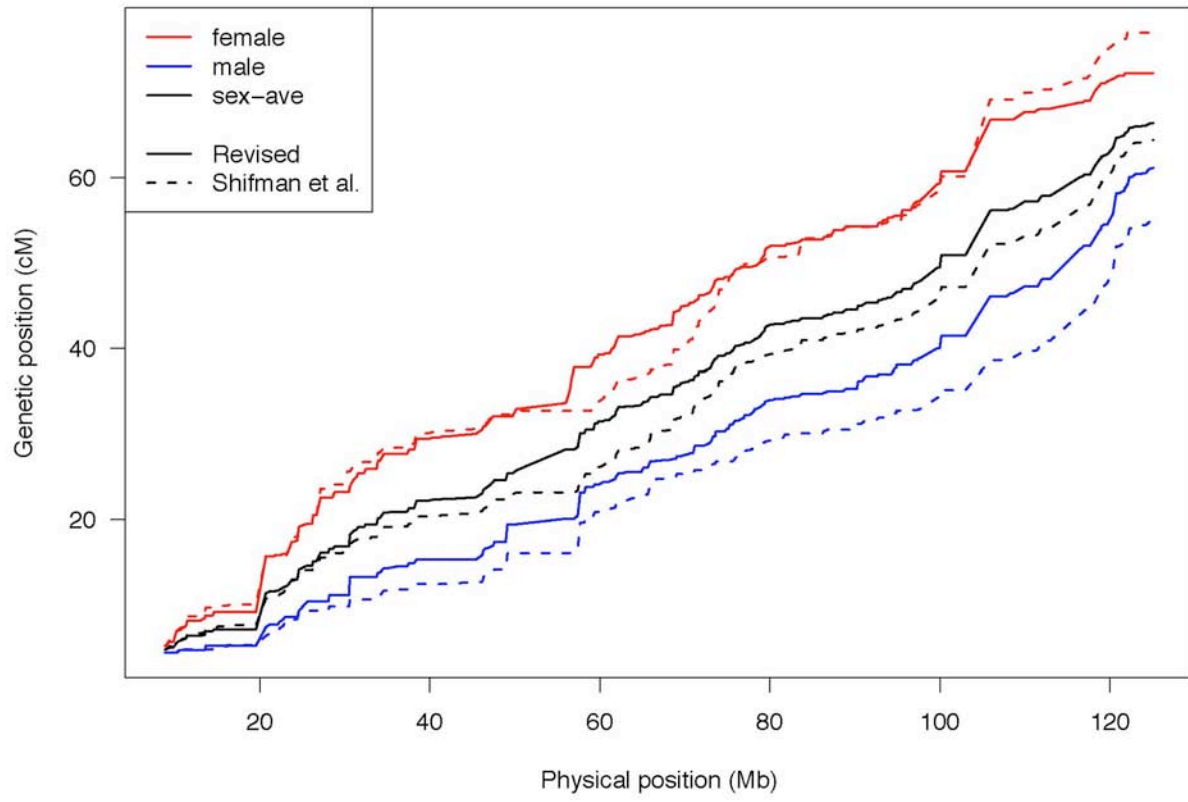

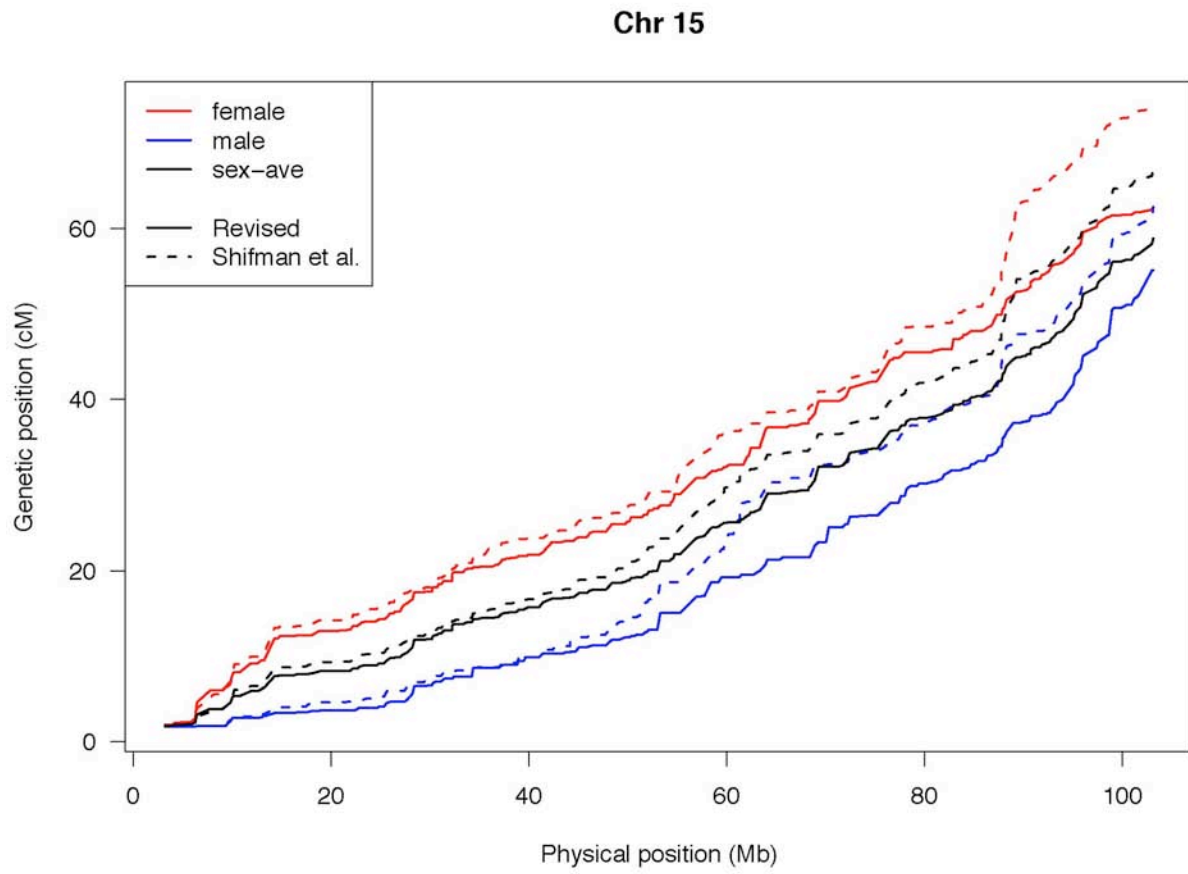

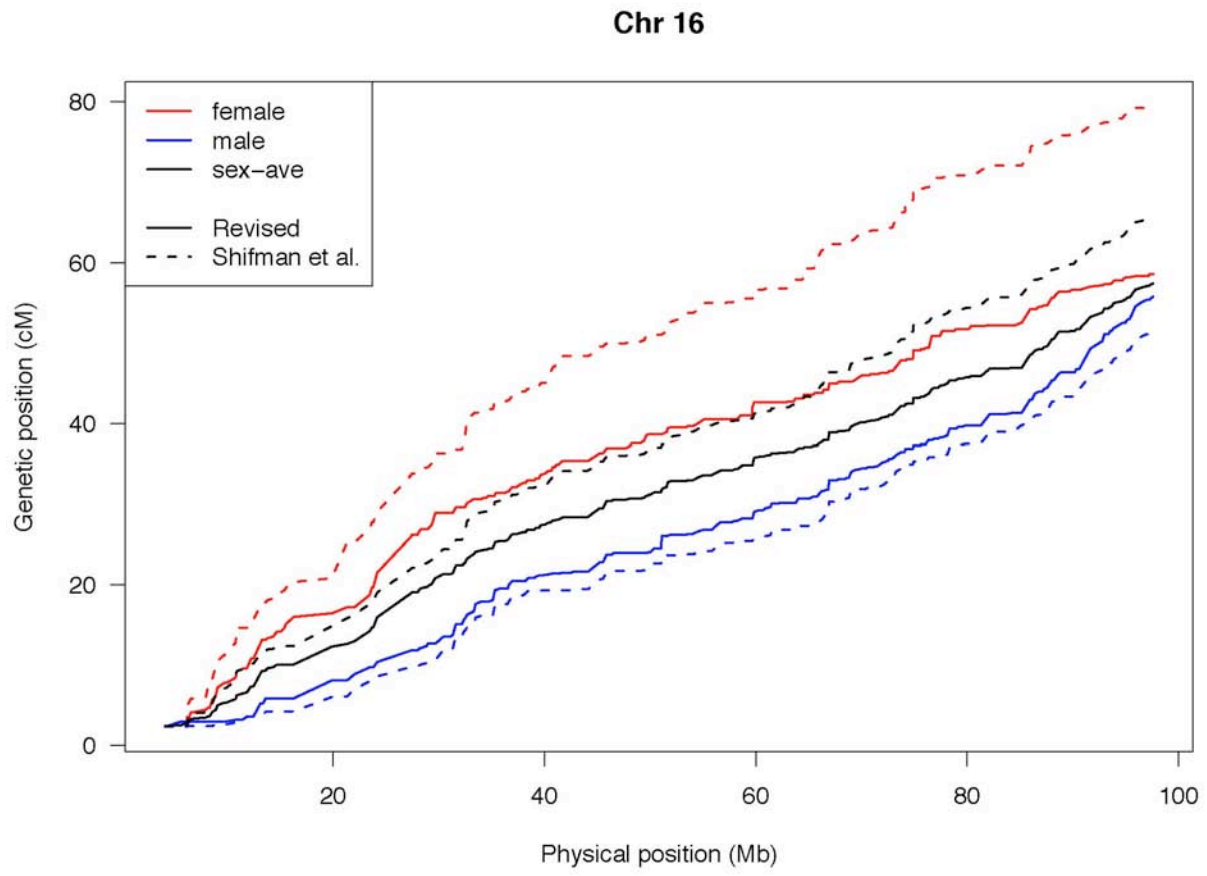

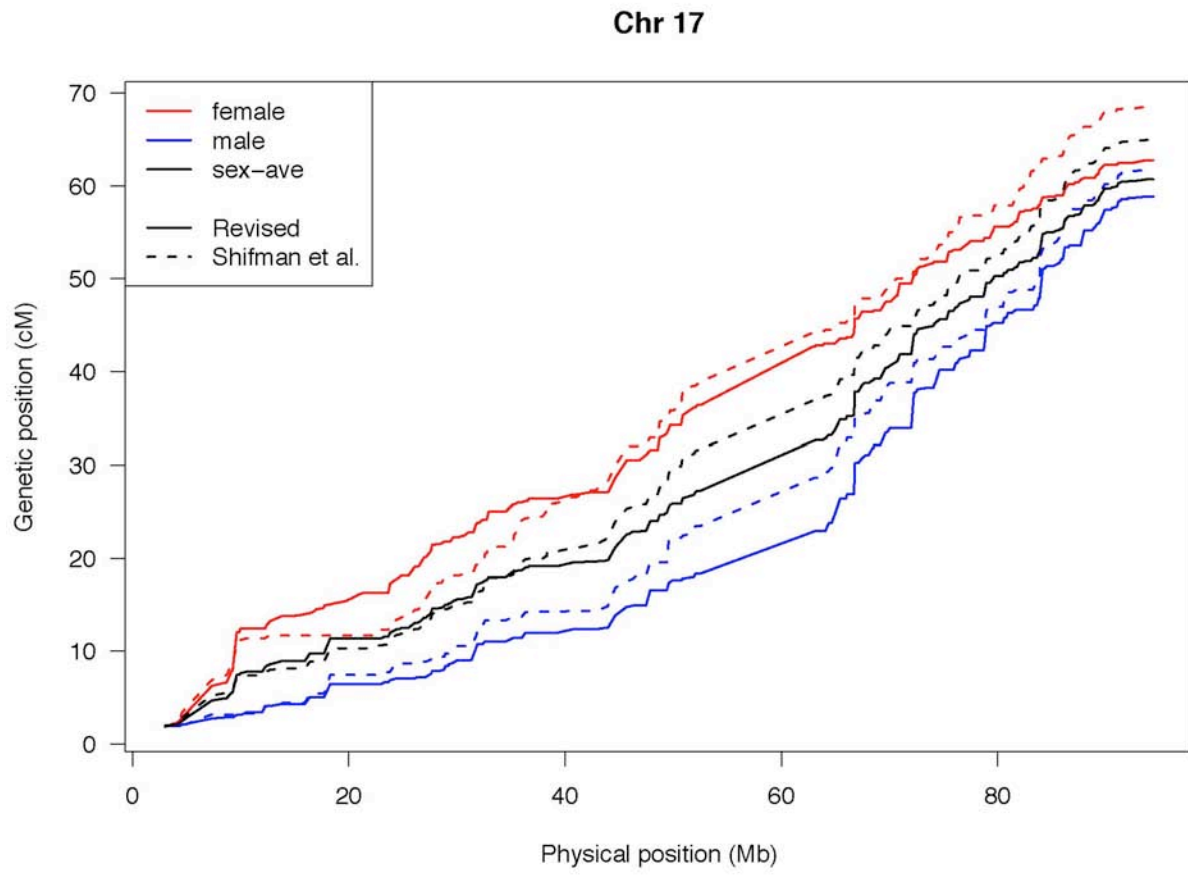

## Chr 18

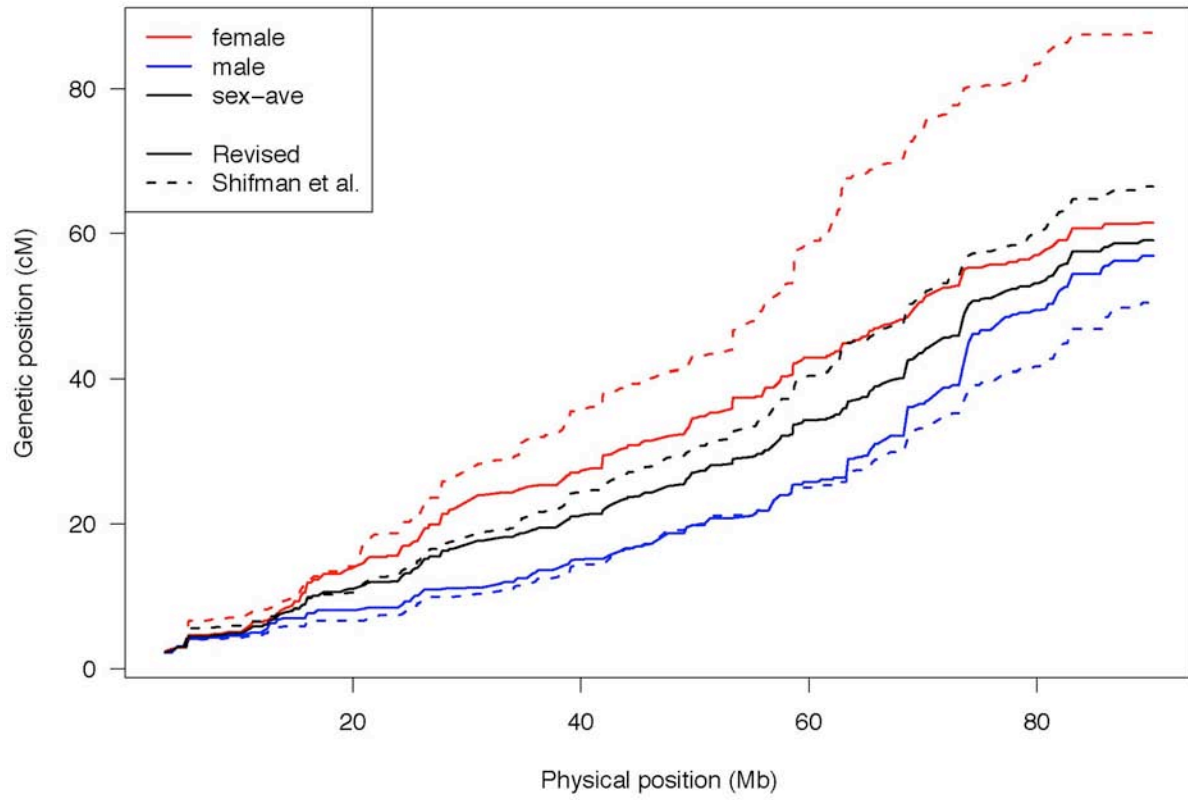

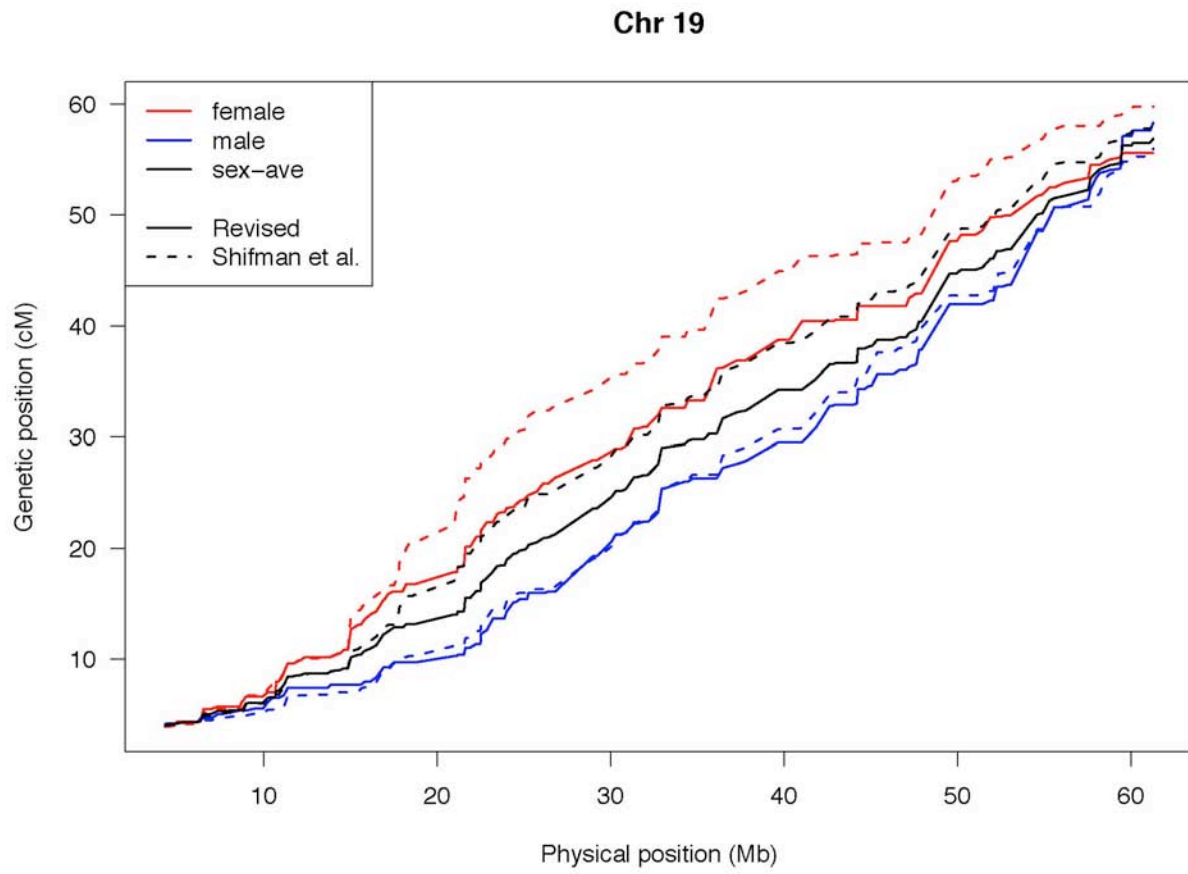



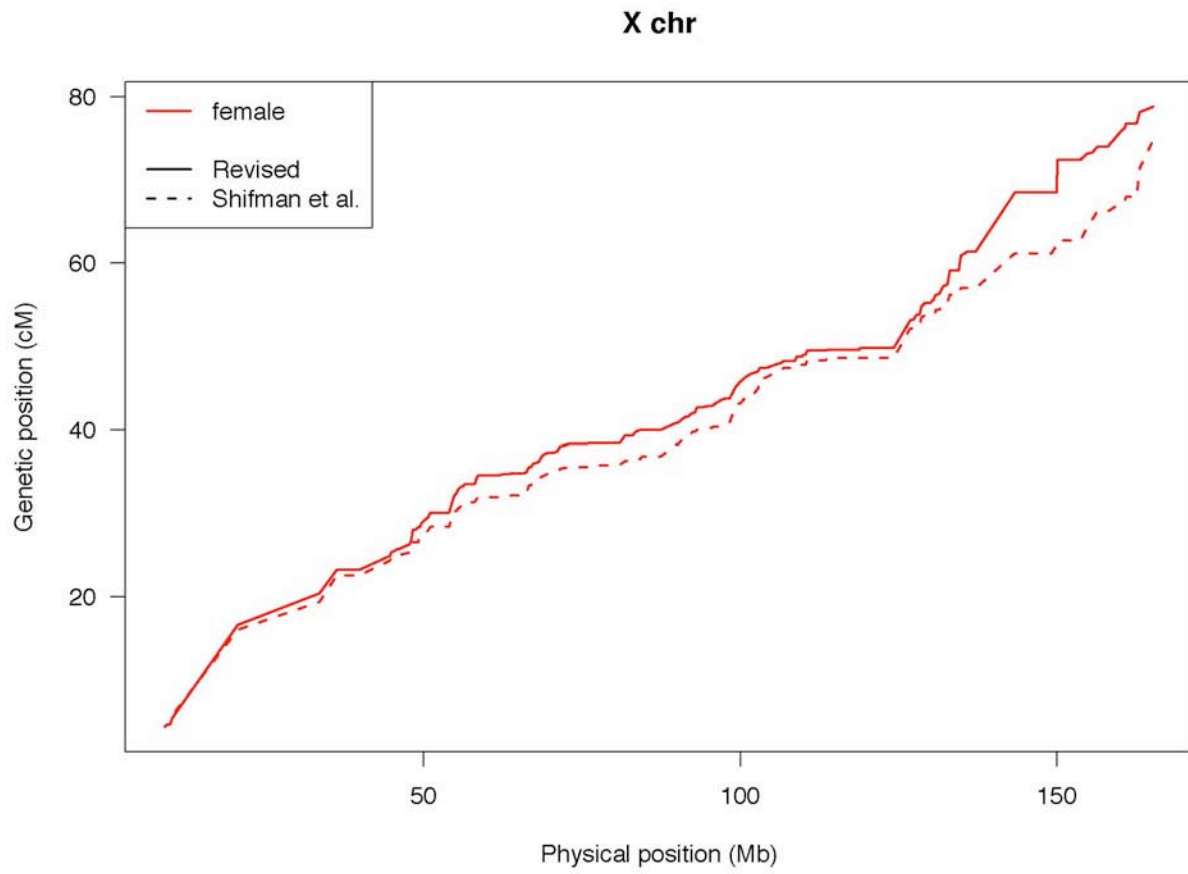

FIGURE S2.—Cumulative genetic maps. Cumulative genetic maps are shown for each chromosome.

**TABLE S1****SNPs that mapped to multiple locations in mouse genome build 37**

| snpID       | chr | Position_Build37             |
|-------------|-----|------------------------------|
| rs13483060  | 17  | 62204189, 62383134           |
| rs13475989  | 1   | 95771627, 95837777, 95906063 |
| rs13477670  | 4   | 42215061, 42803507           |
| rs6177140   | 4   | 31468011, 31651727           |
| rs3659566   | 5   | 128862845, 129018189         |
| mCV24704879 | 7   | 113221222, 113467886         |

**TABLE S2****MIT markers that mapped to multiple locations in mouse genome build 37**

Table S2 is available for download as an Excel file at <http://www.genetics.org/cgi/content/full/genetics.109.105486/DC1>.

**TABLE S3****MIT markers that could not be mapped to mouse genome build 37**

Table S3 is available for download as an Excel file at <http://www.genetics.org/cgi/content/full/genetics.109.105486/DC1>.

**TABLE S4****QTL peaks that showed significant changes when localized on both old and new genetic maps**

| Chr | Peak (cM)* | LOD score* | Peak Marker*     | Cross   | Phenotype          | Type of change         |
|-----|------------|------------|------------------|---------|--------------------|------------------------|
| 1   | 62.5       | 27.50      | <i>D1Mit14</i>   | B6xC3H  | Femoral vBMD       | LOD score              |
|     | 76.0       | 25.52      |                  |         |                    |                        |
| 2   | 60.2       | 1.75       | <i>D2Mit46</i>   | B6xCAST | Femoral vBMD       | Peak shape             |
|     | 55.0       | 1.53       | <i>D2Mit15</i>   |         |                    |                        |
| 2   | 79.4       | 4.04       | <i>D2Mit48</i>   | B6xC3H  | Femoral vBMD       | Peak shape             |
|     | 87.0       | 3.85       |                  |         |                    |                        |
| 4   | 63.6       | 2.64       | <i>D4Mit251</i>  | NZBxRF  | Femoral vBMD       | Peak shape             |
|     | 53.9       | 2.69       | <i>D4Mit26</i>   |         |                    |                        |
| 4   | 68.4       | 3.04       | <i>D4MIT308</i>  | B6x129  | Whole body aBMD    | Marker closest to peak |
|     | 73.2       | 2.98       | <i>D4MIT42</i>   |         |                    |                        |
| 4   | 71.6       | 2.45       | <i>D4Mit68</i>   | B6xCAST | Femoral vBMD       | Marker closest to peak |
|     | 77.9       | 2.37       | <i>D4Mit51</i>   |         |                    |                        |
| 8   | 71.6       | 2.42       | <i>D8Mit280</i>  | B6xC3H  | Ultimate load      | Marker closest to peak |
|     | 64.0       | 2.59       | <i>D8Mit167</i>  |         |                    |                        |
| 11  | 70.7       | 4.25       | <i>D11Mit126</i> | NZBxRF  | Ultimate load      | Marker closest to peak |
|     | 75.1       | 4.26       | <i>D11Mit48</i>  |         |                    |                        |
| 12  | 15.5       | 7.34       | <i>D12Mit285</i> | NZBxRF  | Ultimate load      | Marker closest to peak |
|     | 6.0        | 7.55       | <i>D12Mit182</i> |         |                    |                        |
| 12  | 30.2       | 3.52       | <i>D12Mit201</i> | NZBxRF  | Femoral vBMD       | Peak Shape             |
|     | 29.0       | 3.39       |                  |         |                    |                        |
| 14  | 4.7        | 1.92       | <i>D14Mit110</i> | B6xC3H  | Cortical thickness | LOD score**            |
| 14  | 56.2       | 3.66       | <i>D14Mit170</i> | B6xCAST | Femoral vBMD       | Peak Shape             |
|     | 63.0       | 3.17       |                  |         |                    |                        |
| 18  | 20.5       | 8.96       | <i>D18Mit120</i> | B6xC3H  | Ultimate load      | Marker closest to peak |
|     | 20.0       | 9.08       | <i>D18Mit36</i>  |         |                    |                        |
| 18  | 57.5       | 1.75       | <i>D18Mit6</i>   | B6xCAST | Femoral vBMD       | Peak shape             |
|     | 54.0       | 1.94       |                  |         |                    |                        |
| 19  | 29.8       | 2.44       | <i>D19Mit11</i>  | NZBxSM  | Vertebral aBMD     | Peak shape             |
|     | 27.0       | 2.68       |                  |         |                    |                        |

\* The top value is the result from the new map and the bottom from the traditional map analysis.

\*\* LOD change resulted in a failure to detect QTL in one analysis
