# Supplementary material for: A New Standard Genetic Map for the Laboratory Mouse
Source: Oxford University Press journal article supplement (doi:10.1534/genetics.109.105486), 2009-06-18
Supplement: figures1.pdf [file figures1.pdf]

FIGURE S1

**1**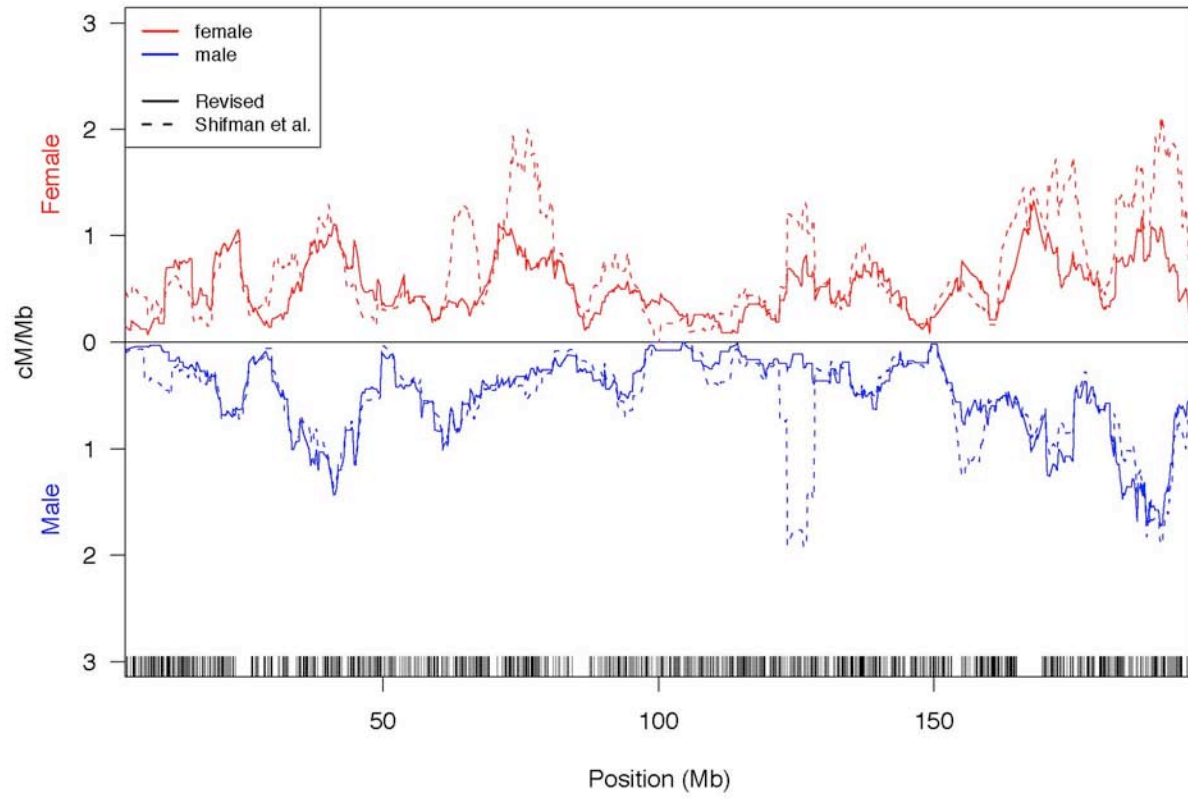

2

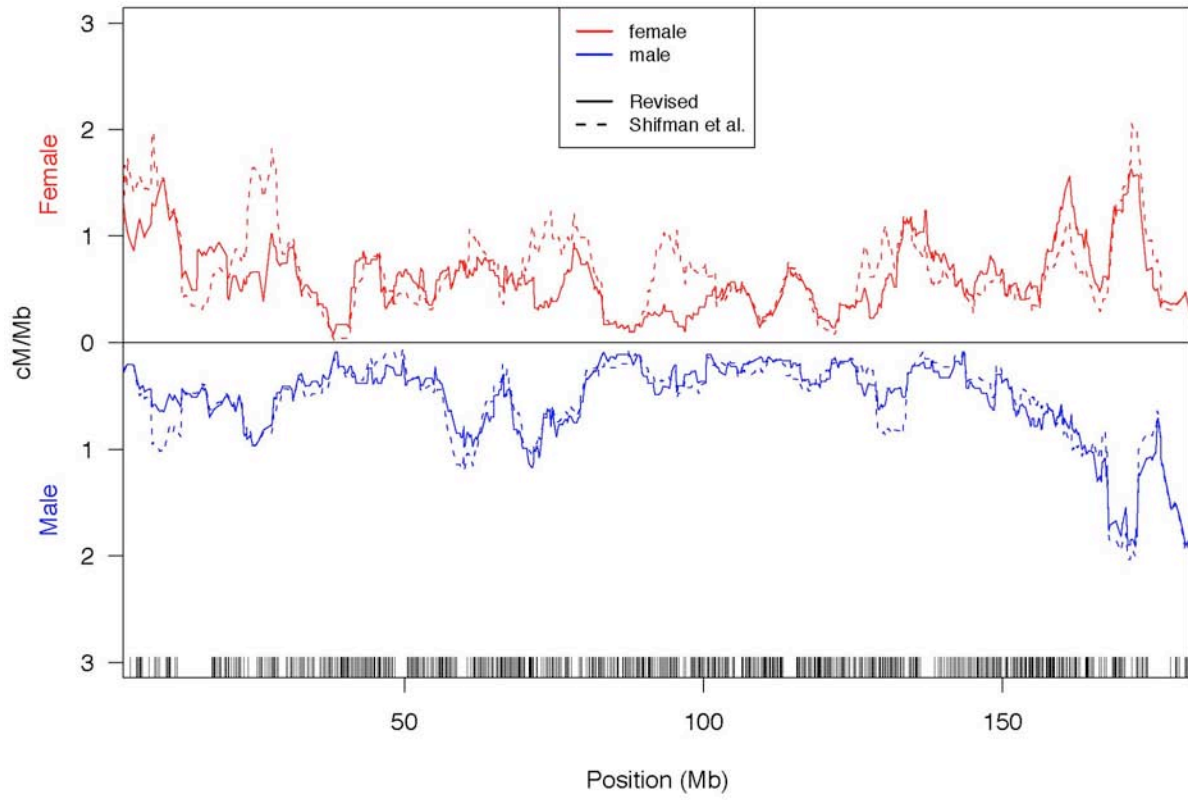

## 3

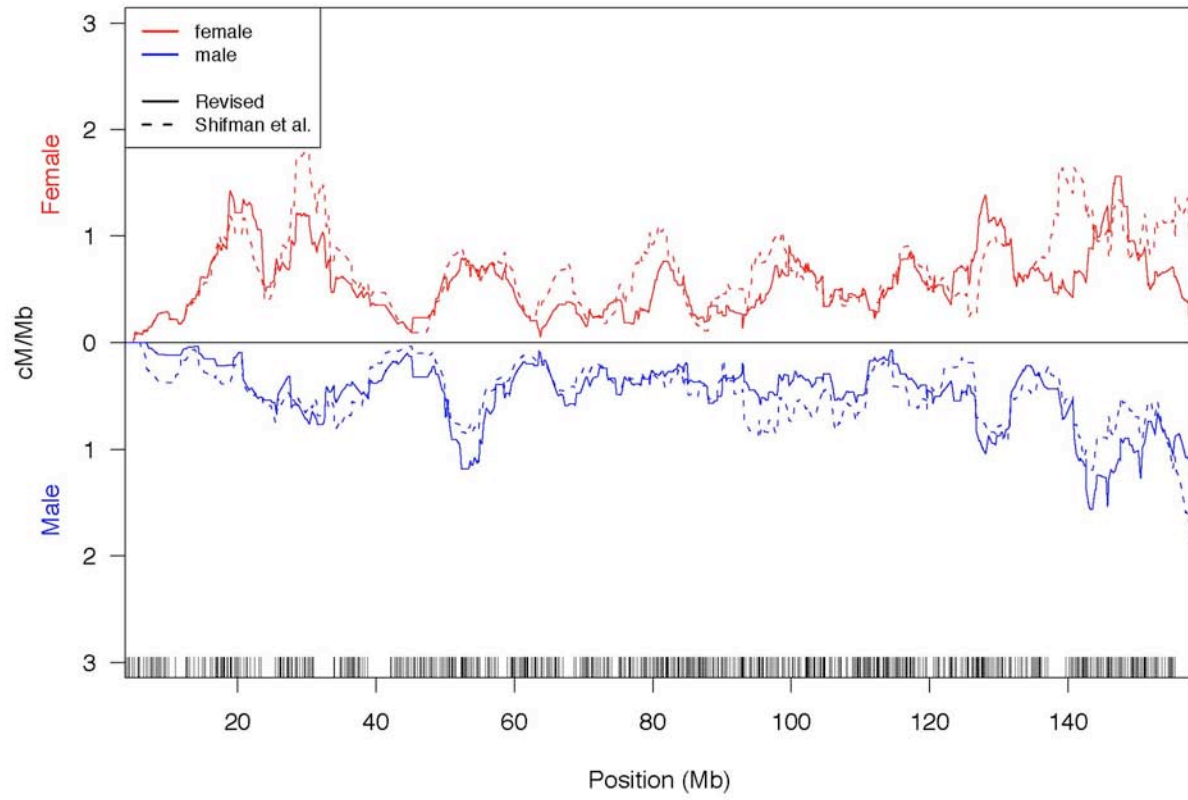

4

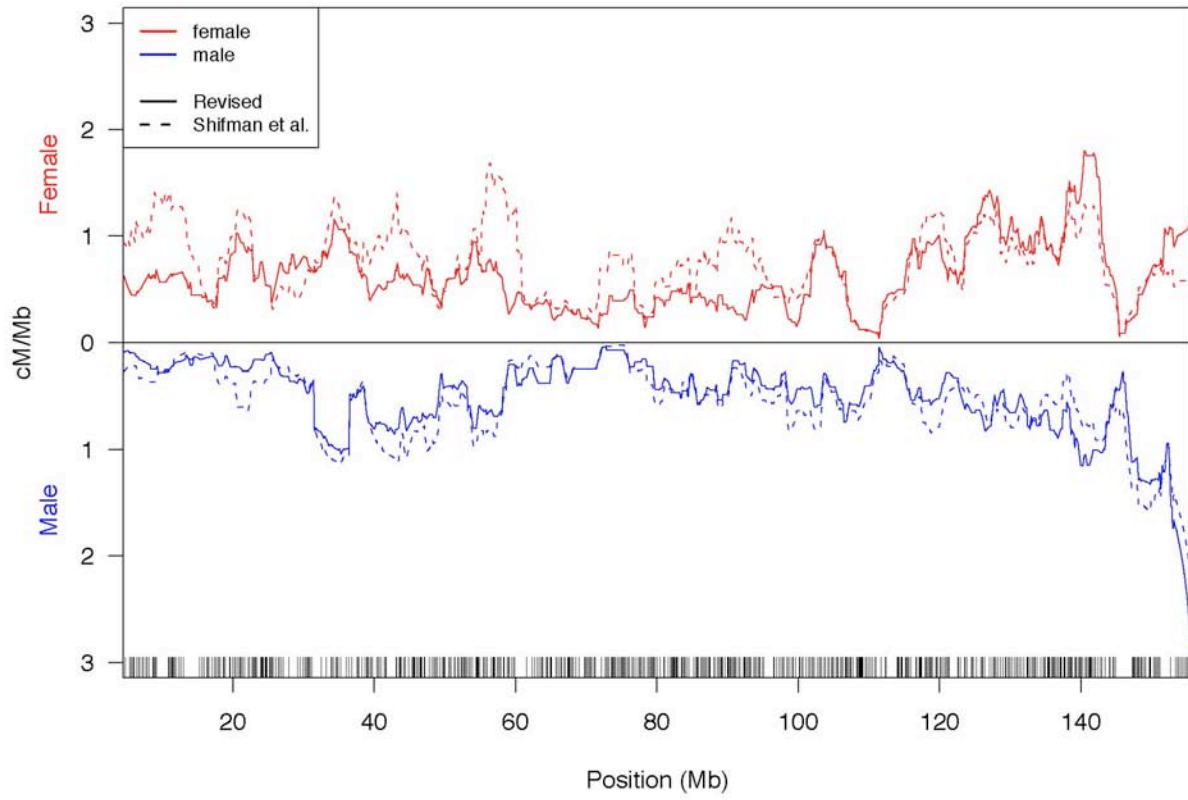

5

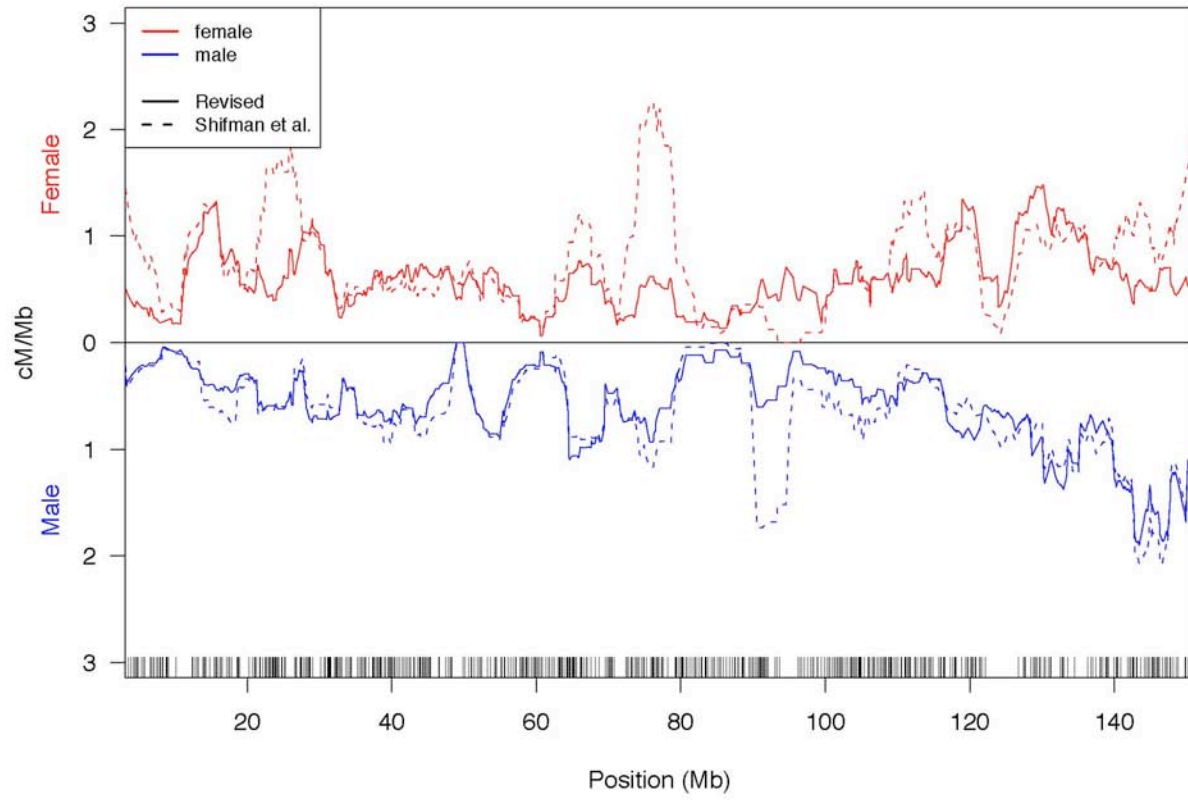

6

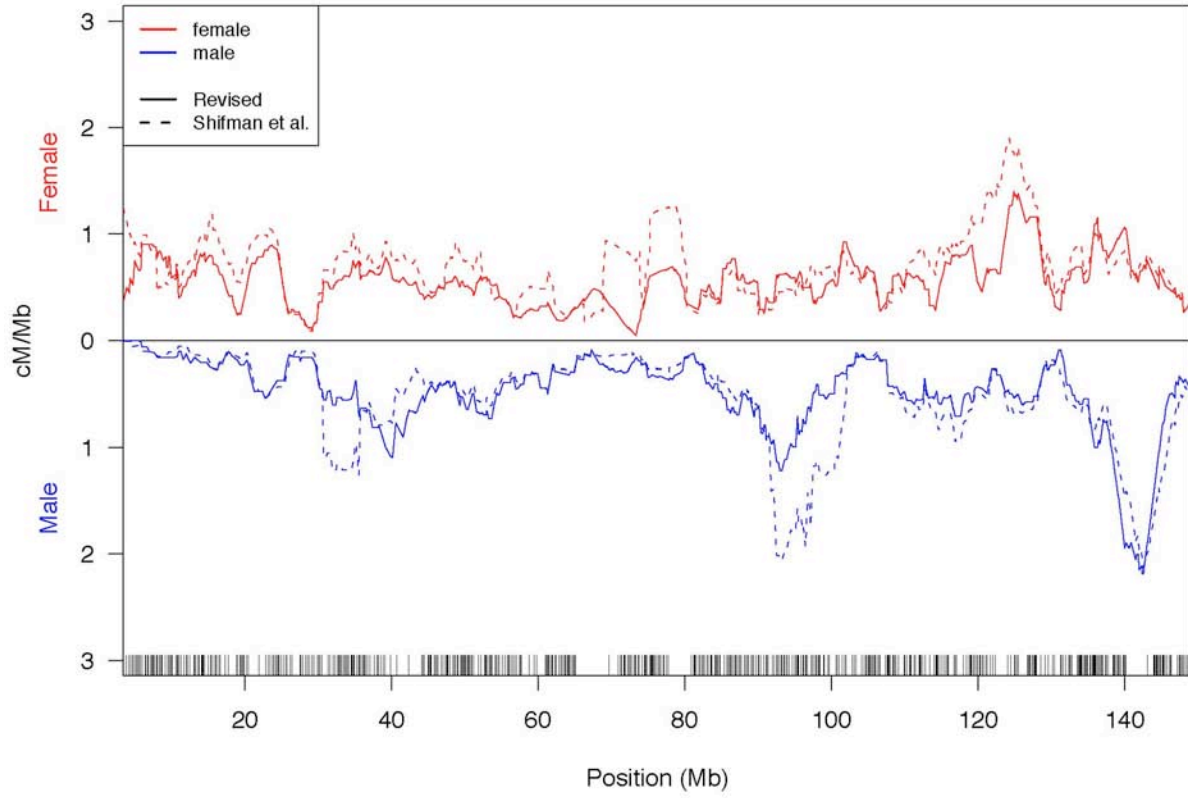

7

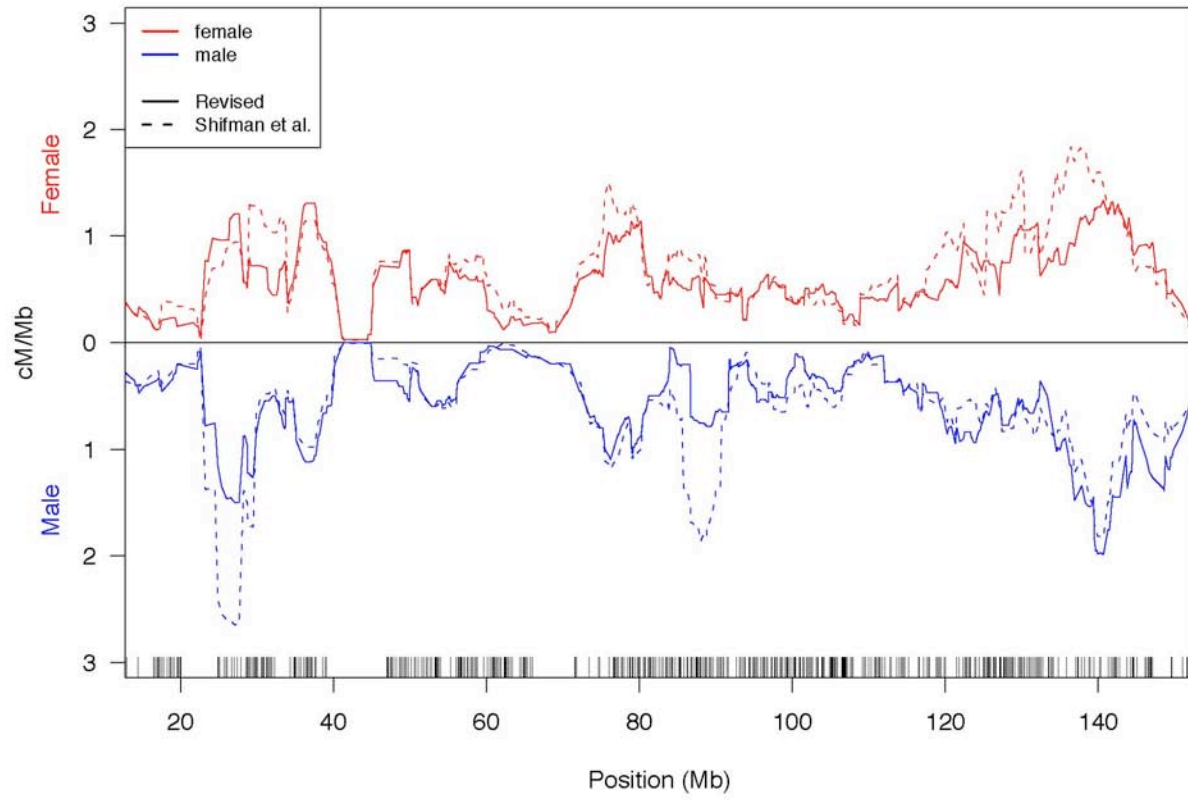

8

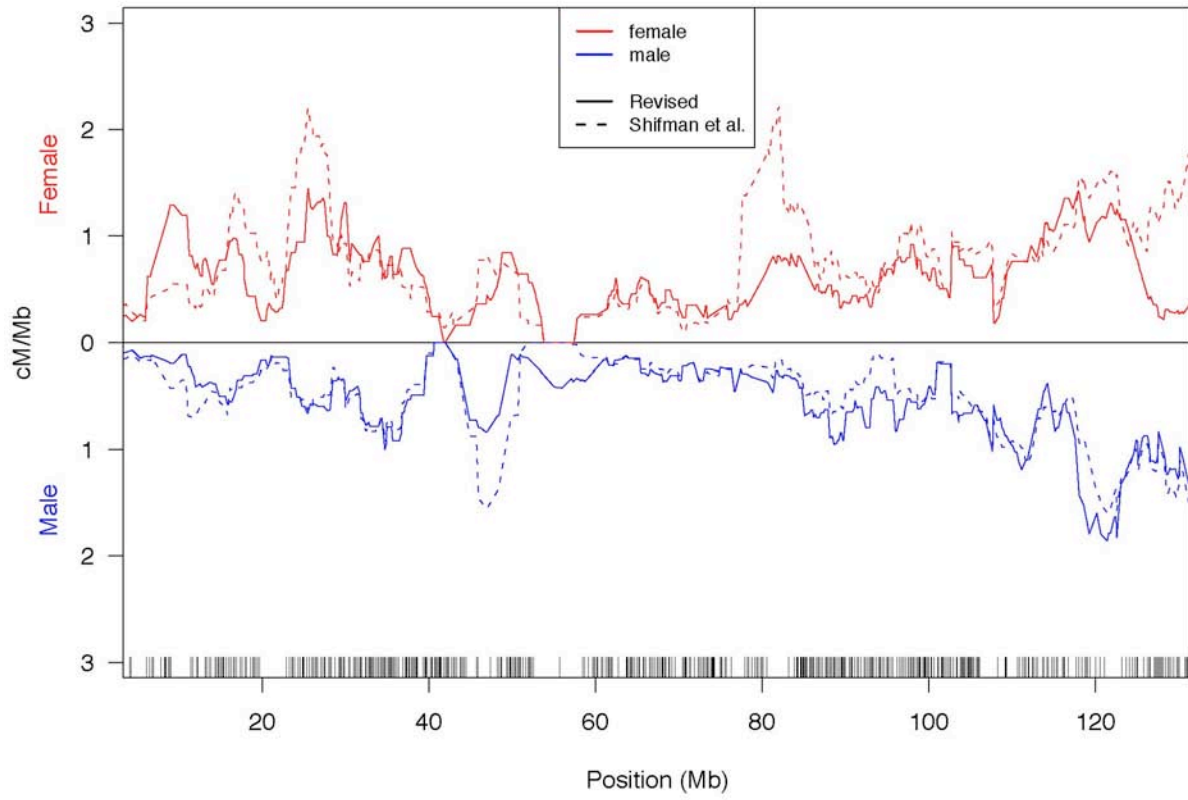



9

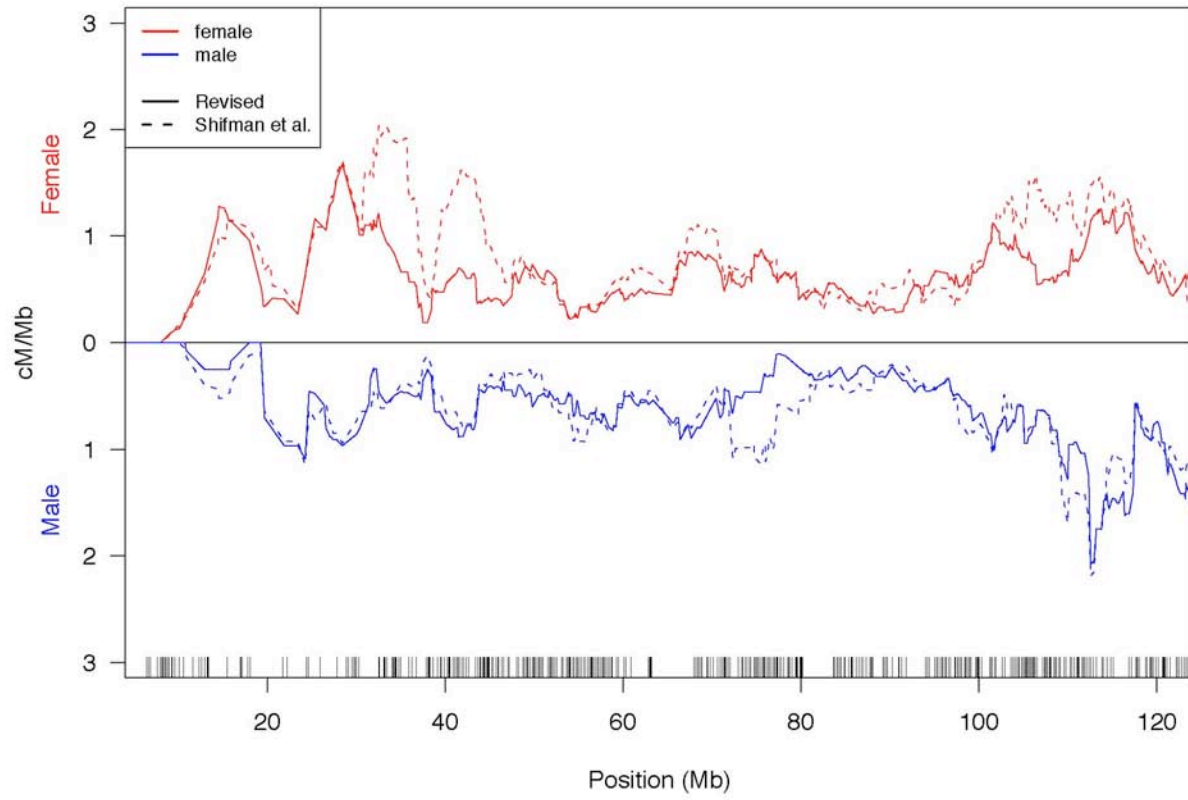

10

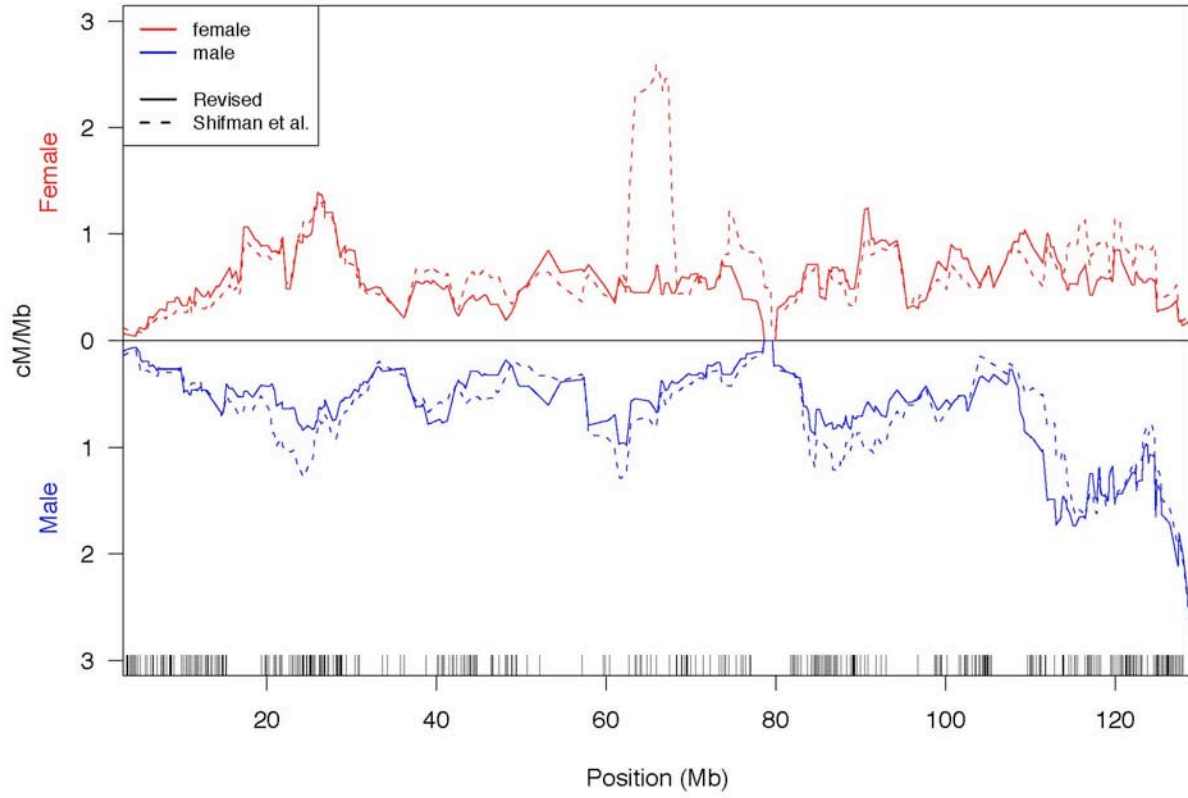

11

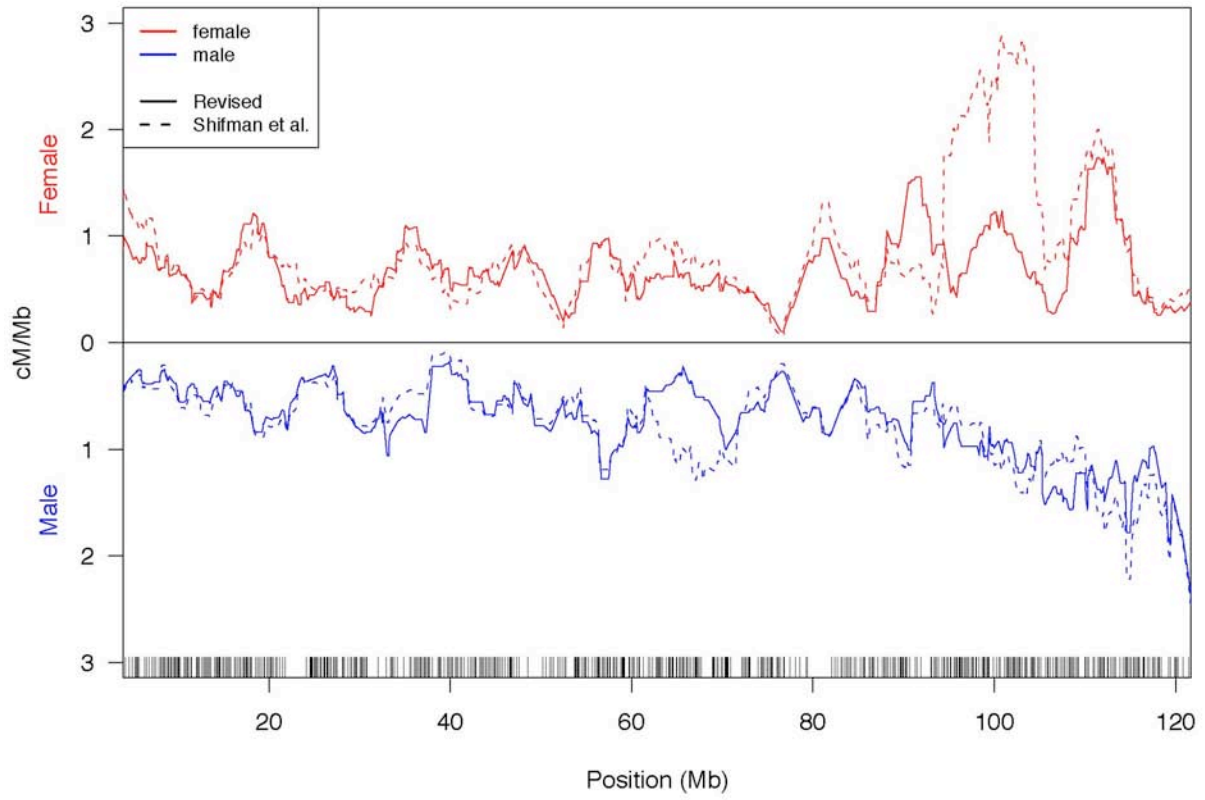

12

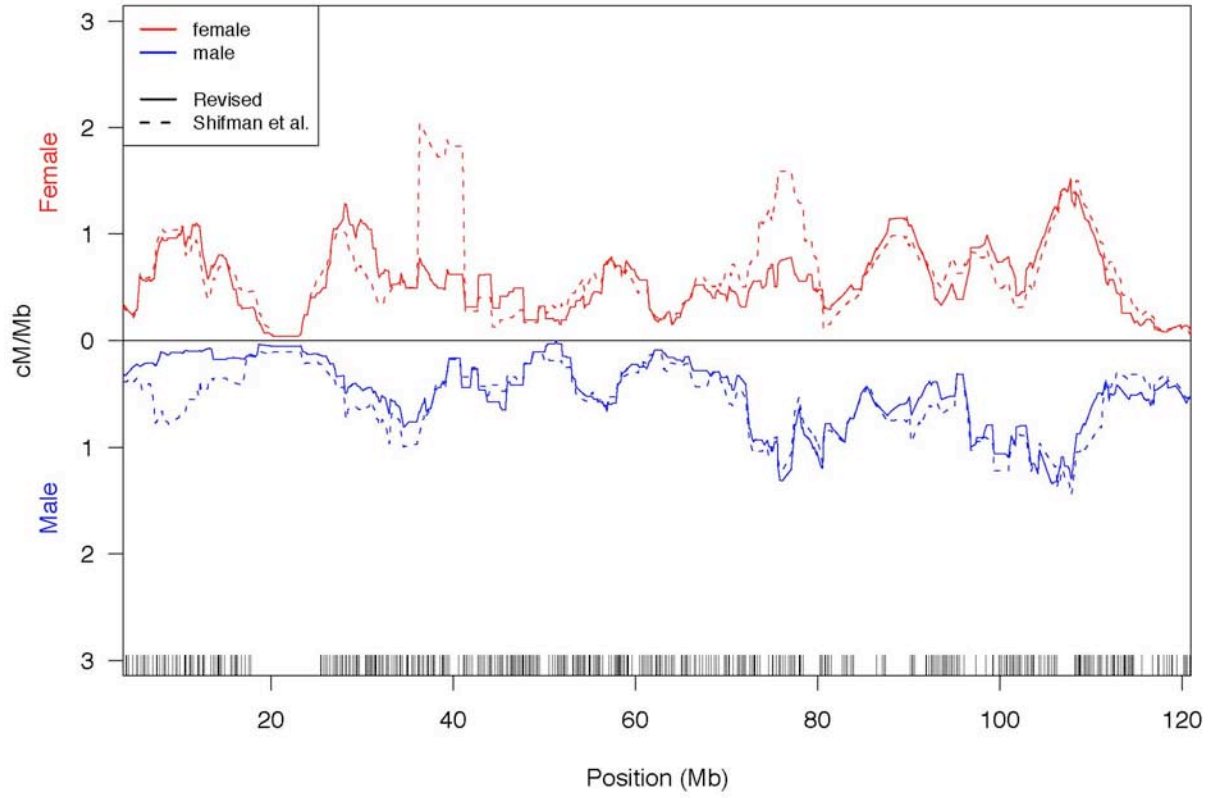

## 13

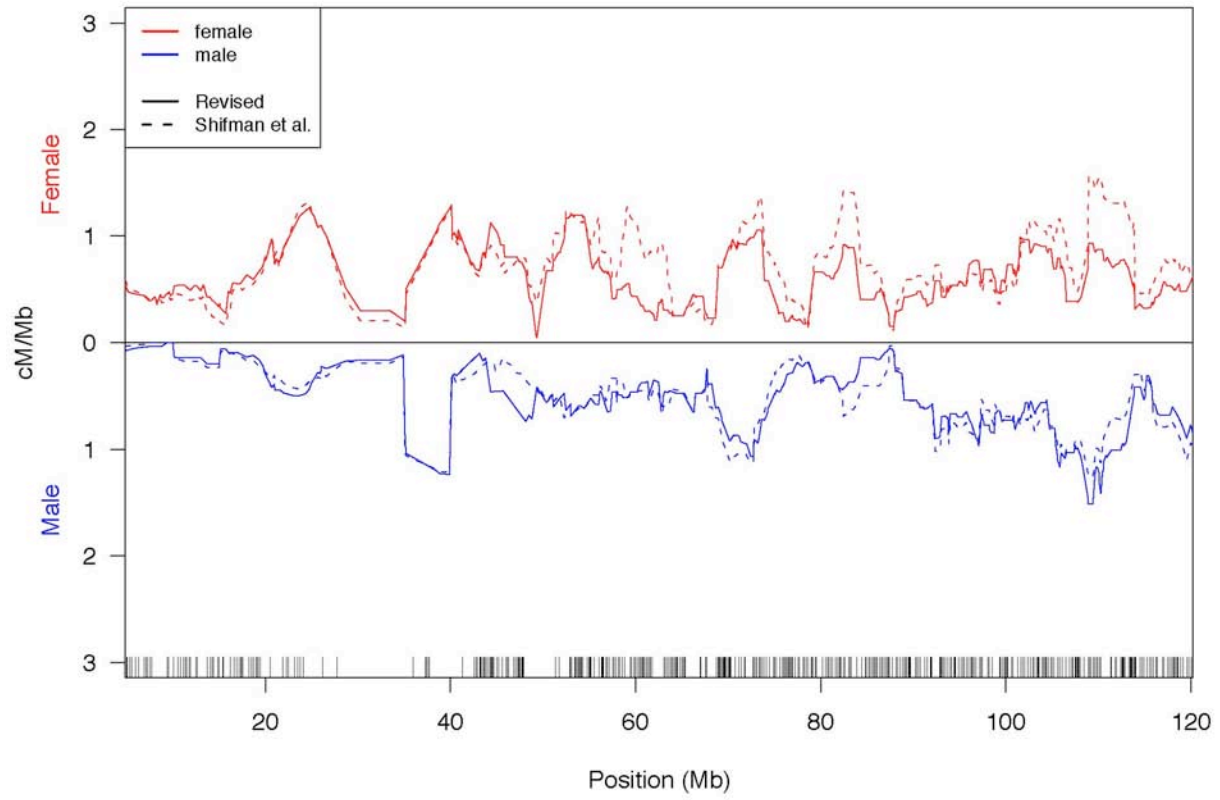

14

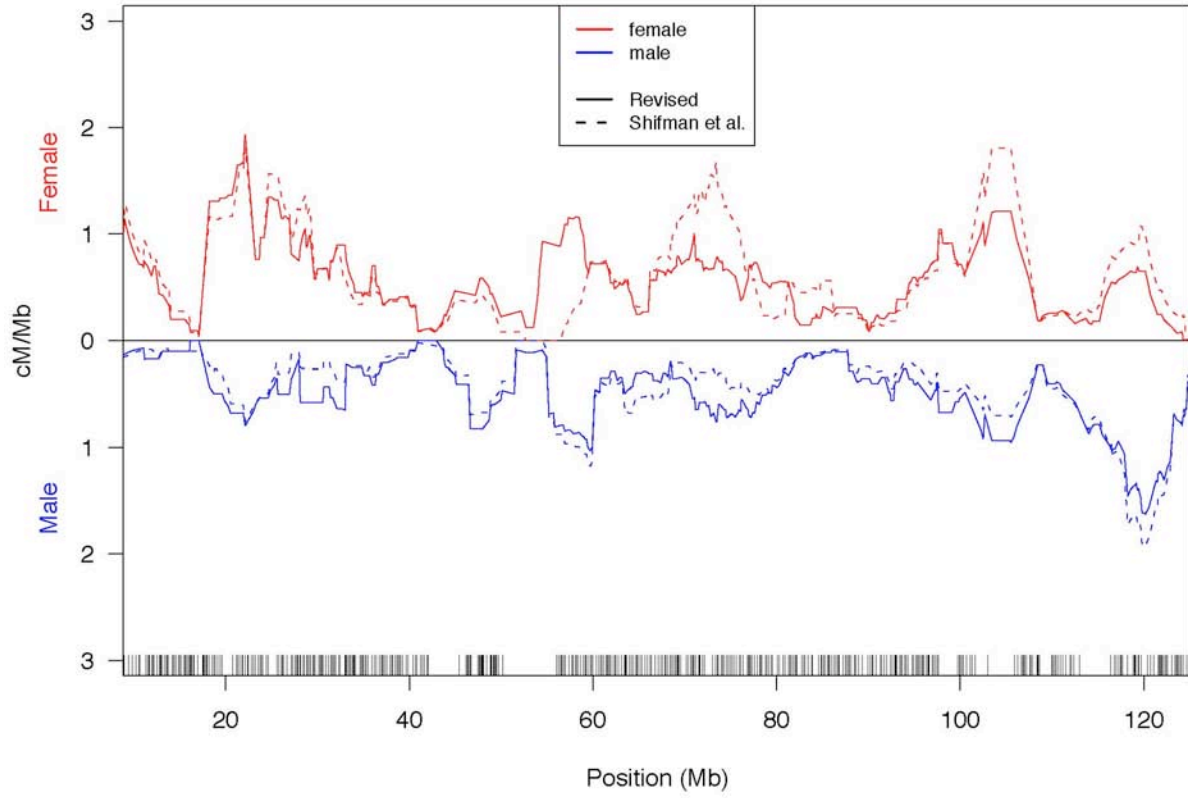

15

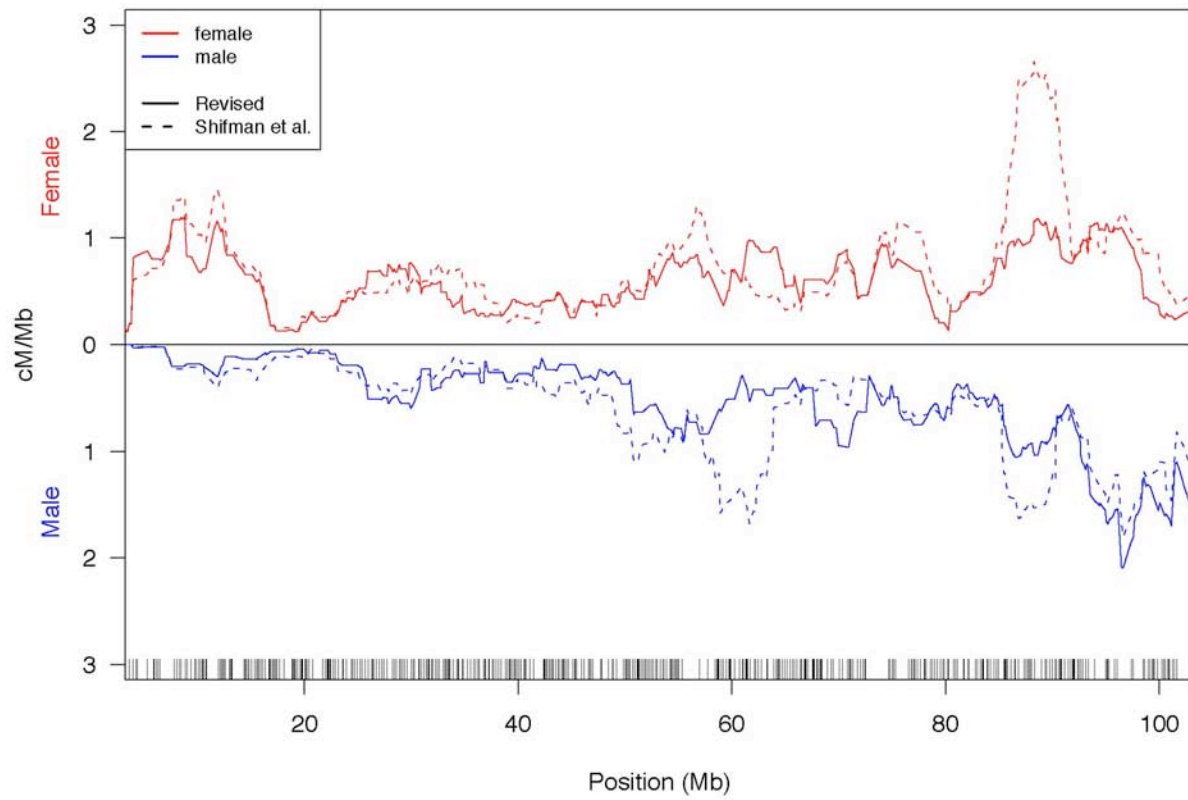

16

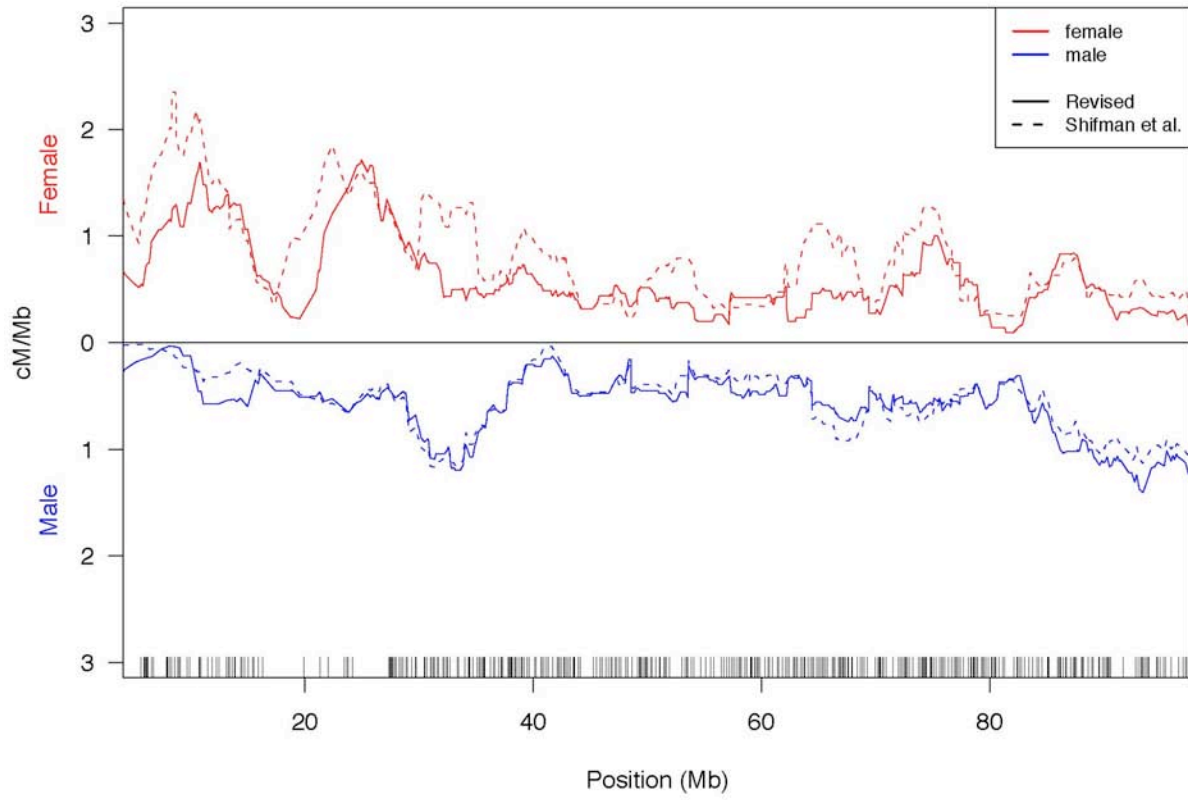



17

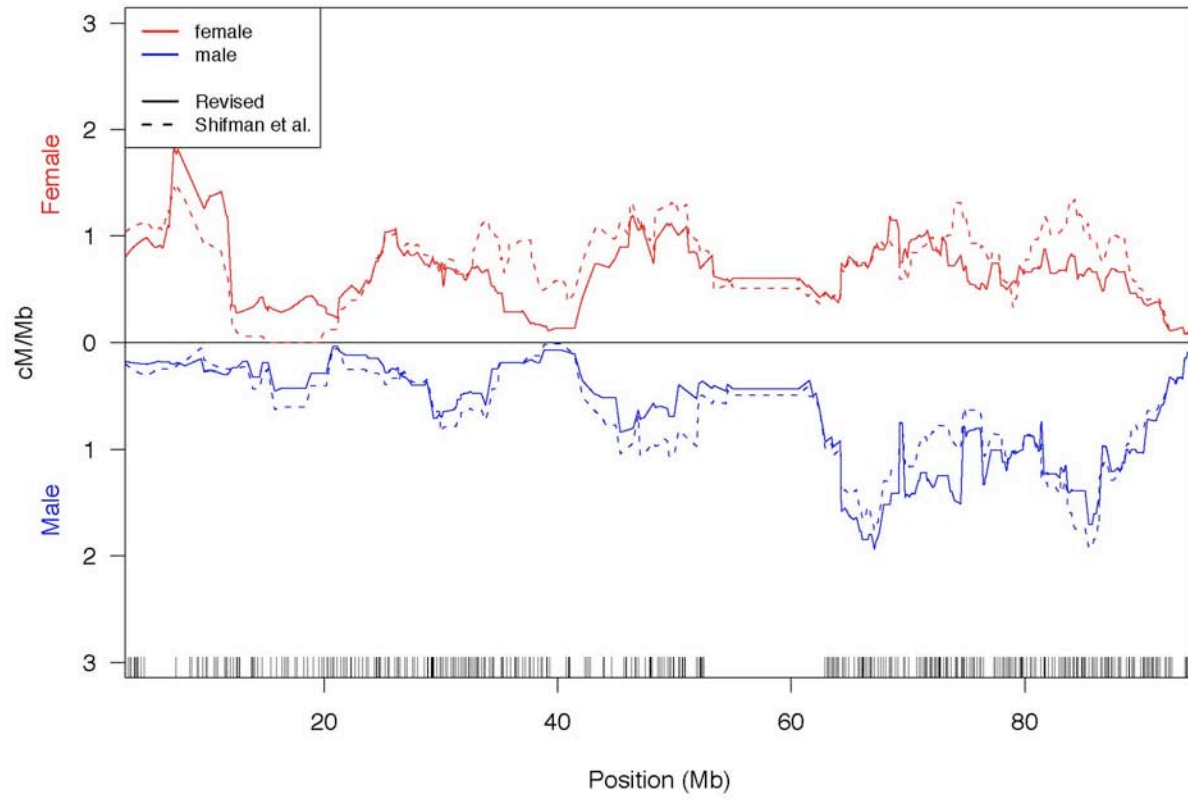

18

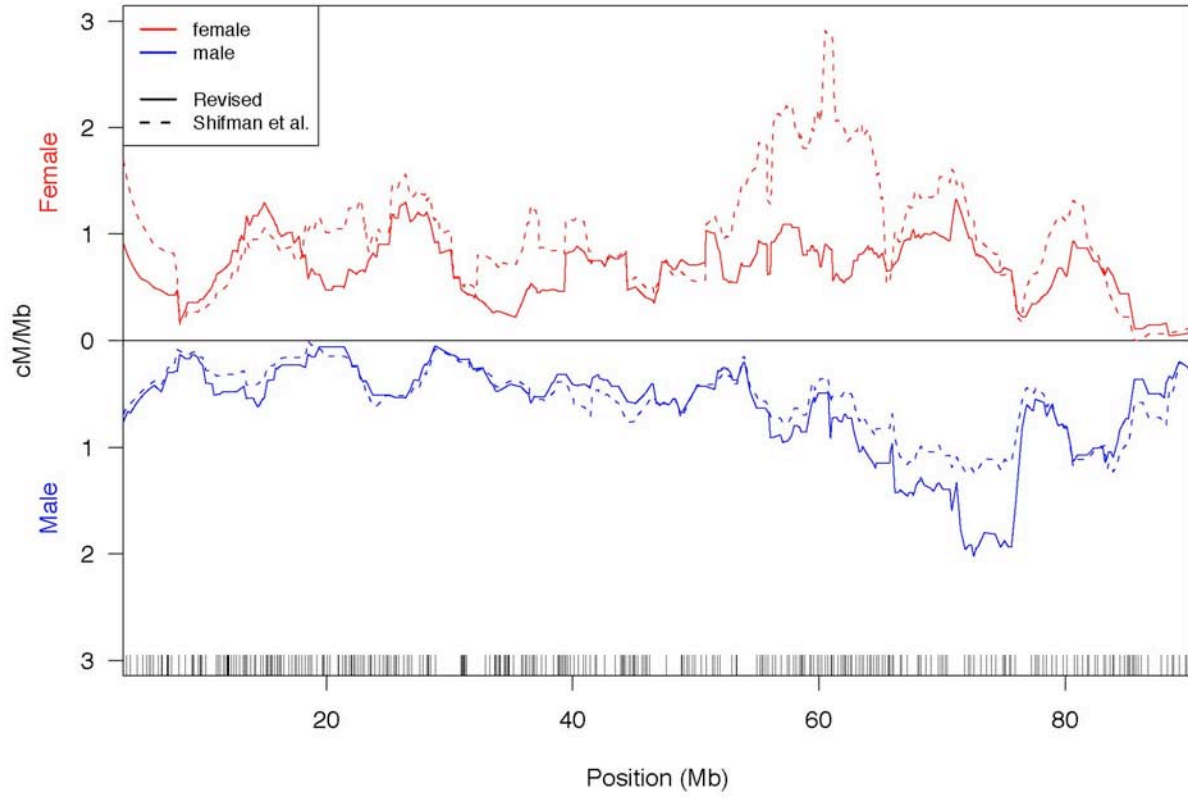

19

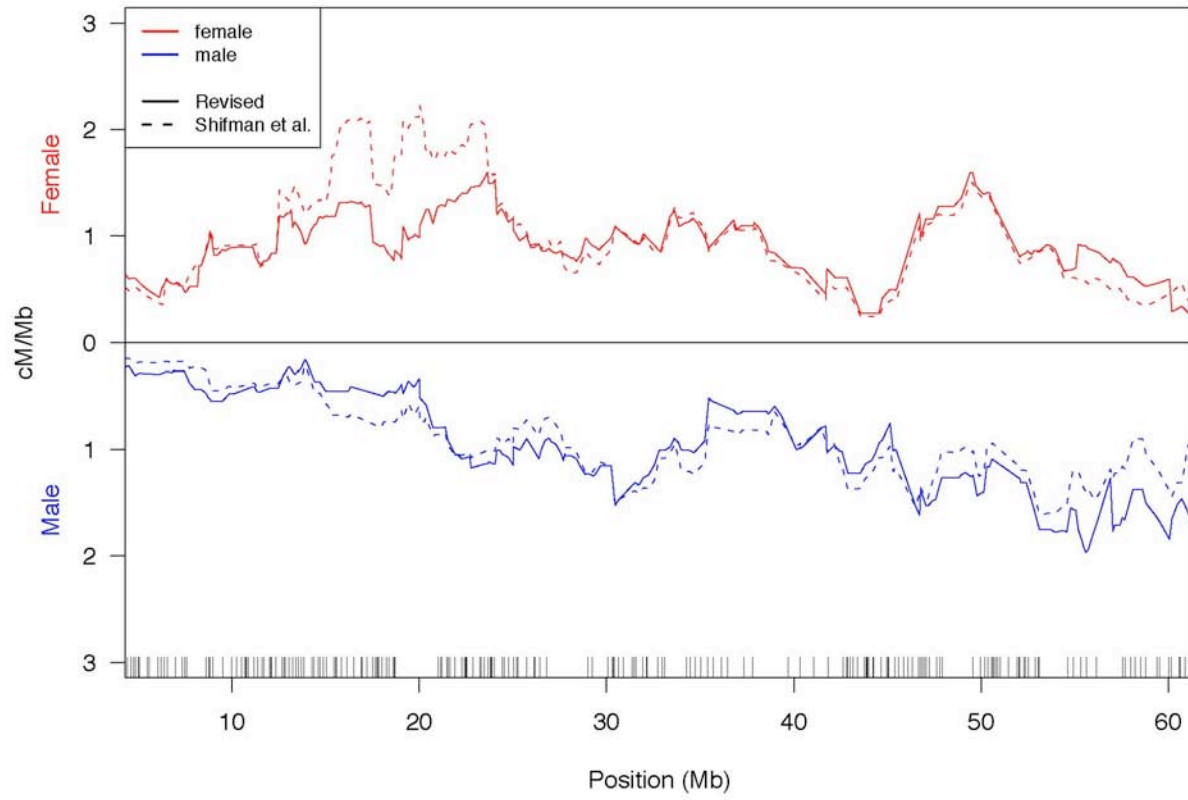

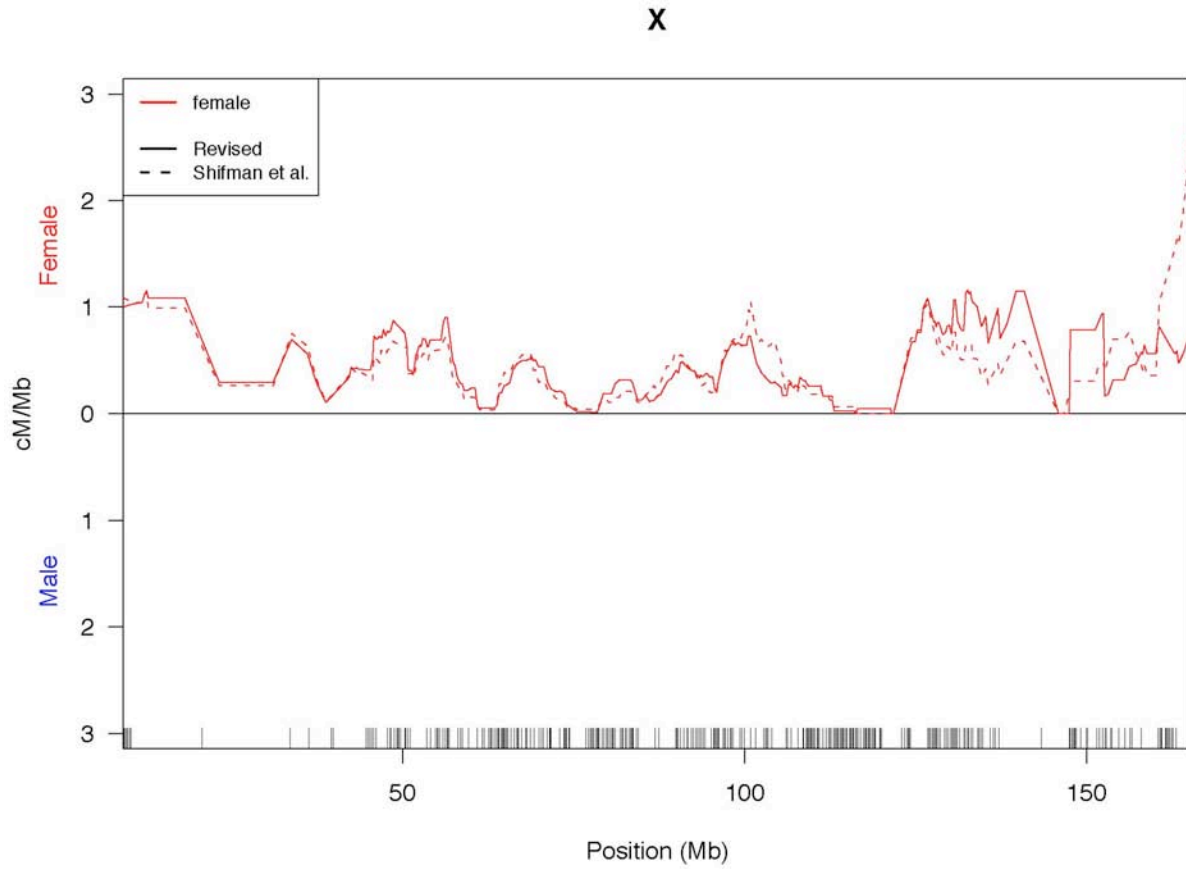

FIGURE S1.— Recombination rates in the original and revised genetic maps. Sex-specific recombination rates for the original and revised genetic maps of all Chromosomes. Maps are based on data from Shifman *et al.*, (2006) as described in Methods.
