# Supplementary material for: A New Standard Genetic Map for the Laboratory Mouse
Source: Oxford University Press journal article supplement (doi:10.1534/genetics.109.105486), 2009-06-18
Supplement: figures2.pdf [file figures2.pdf]

FIGURE S2

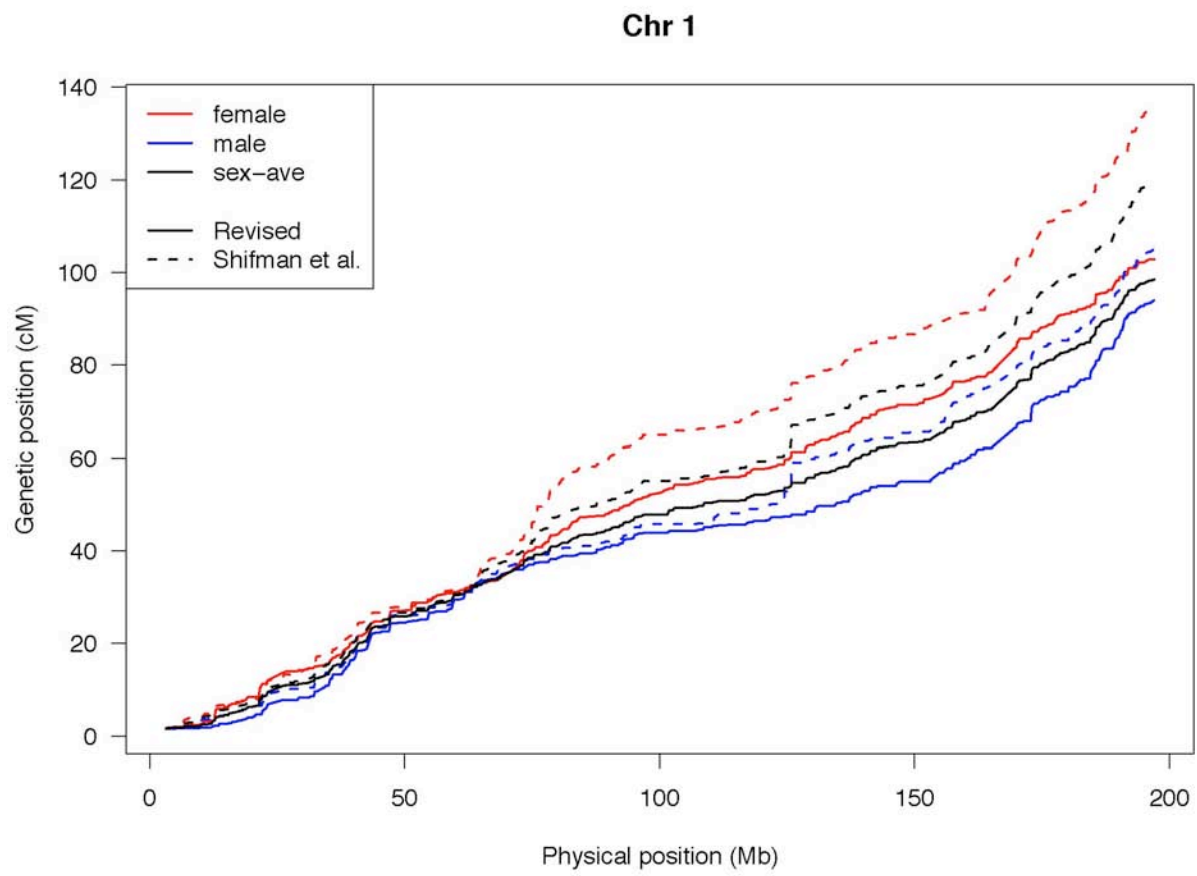

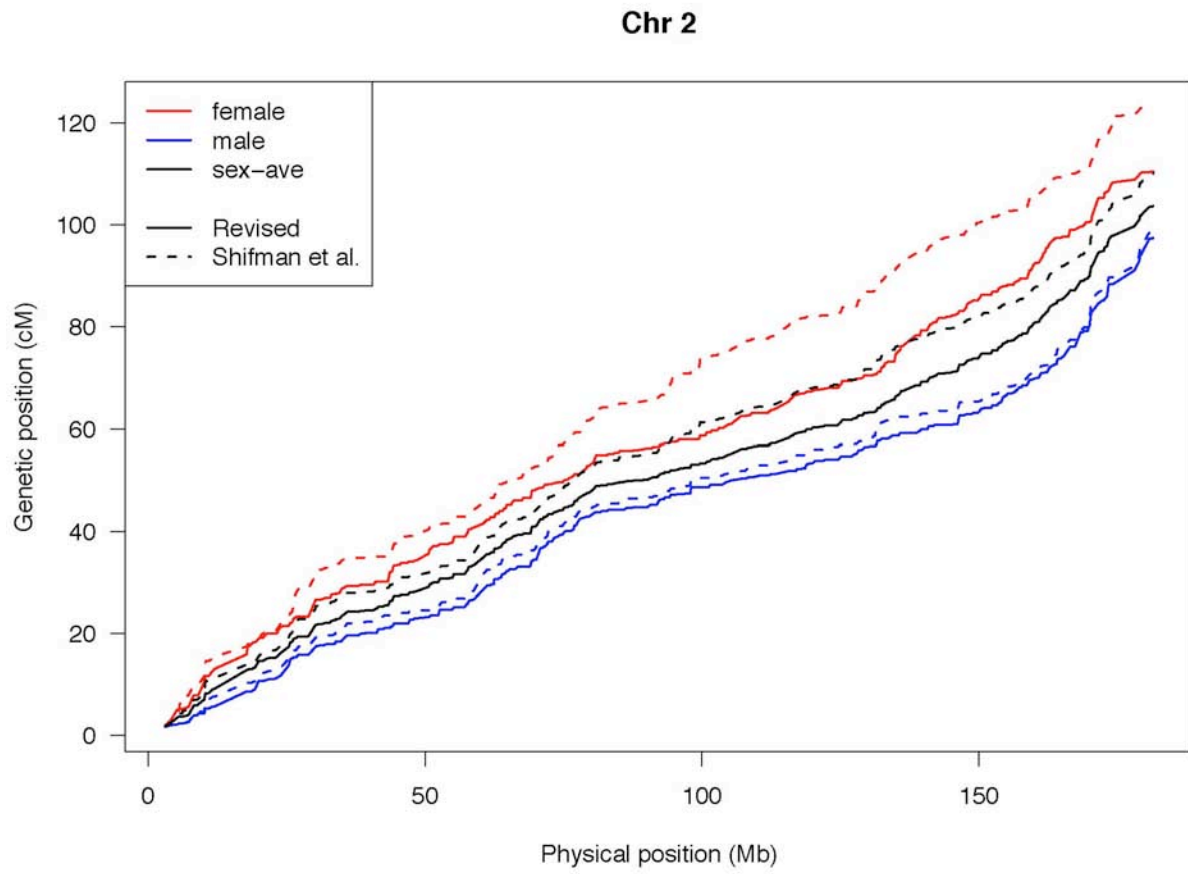

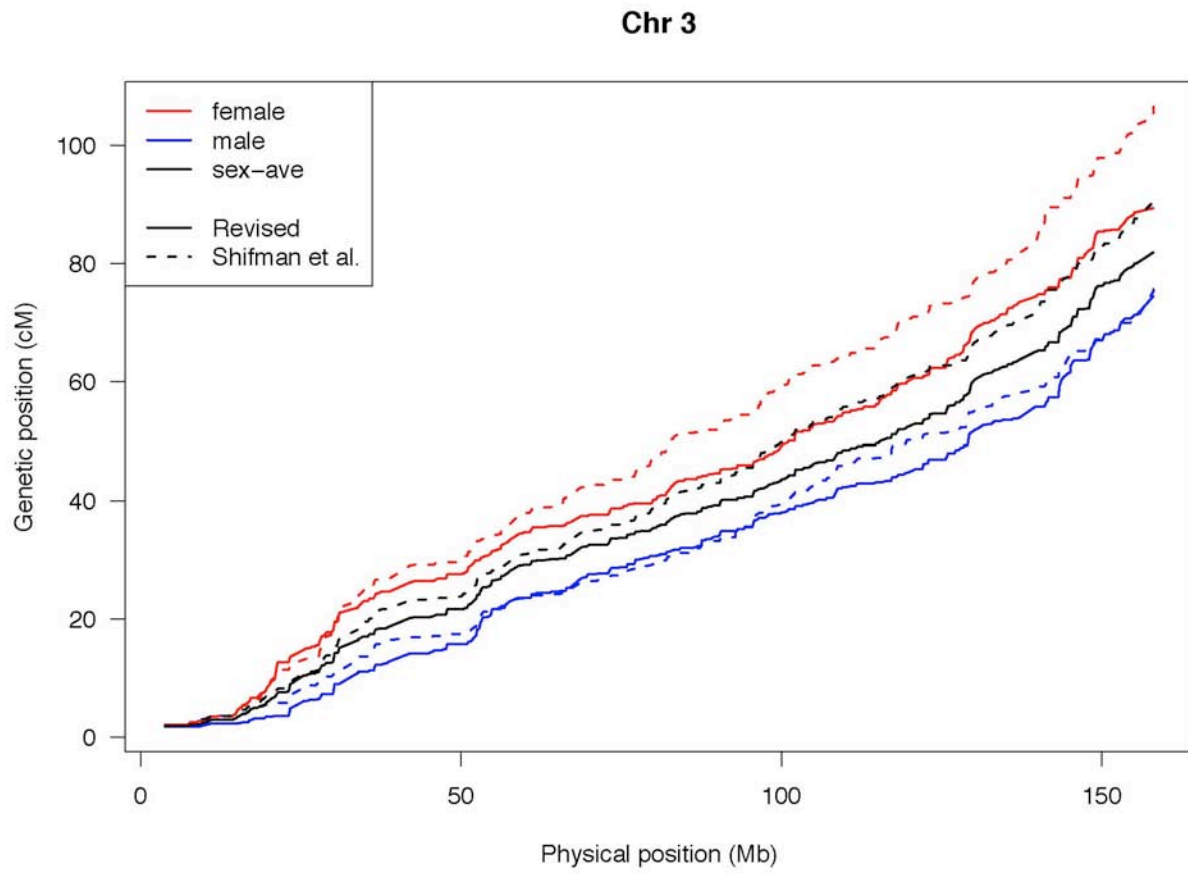

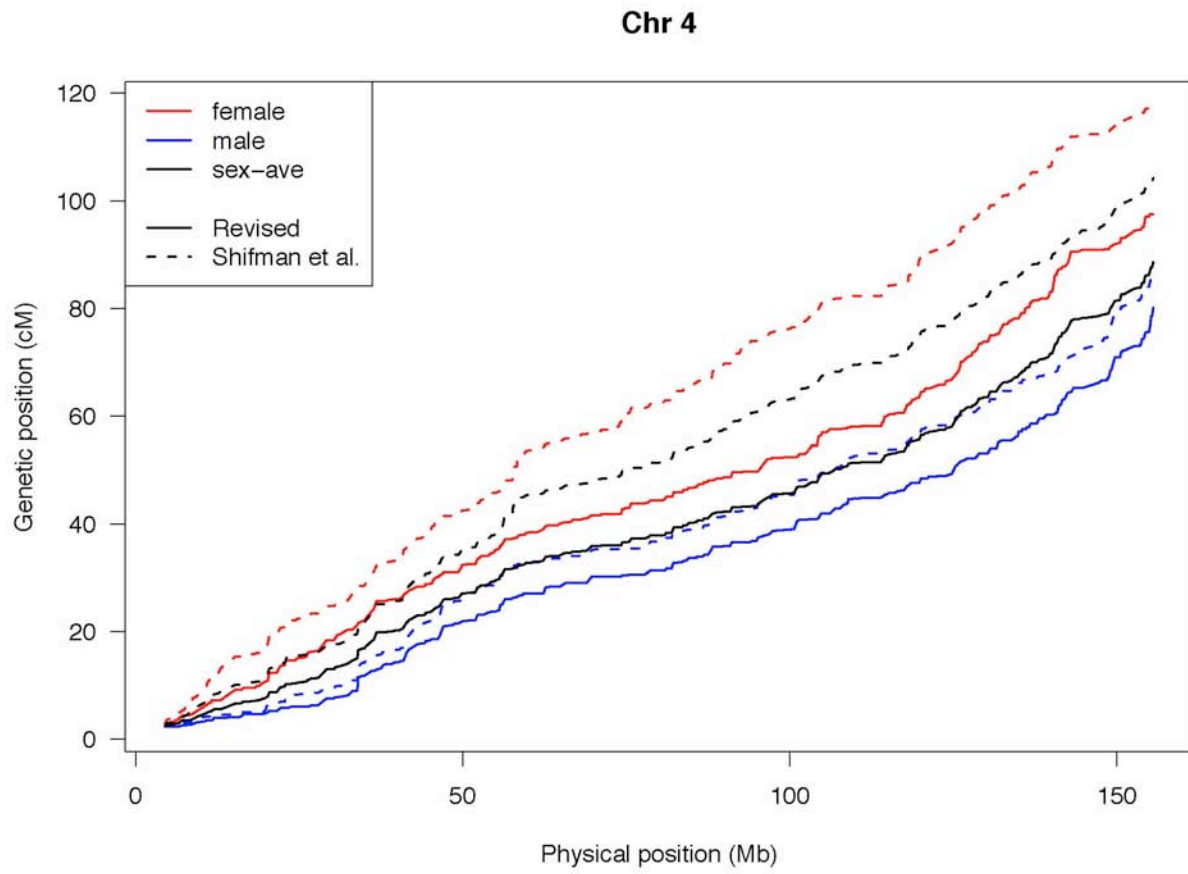

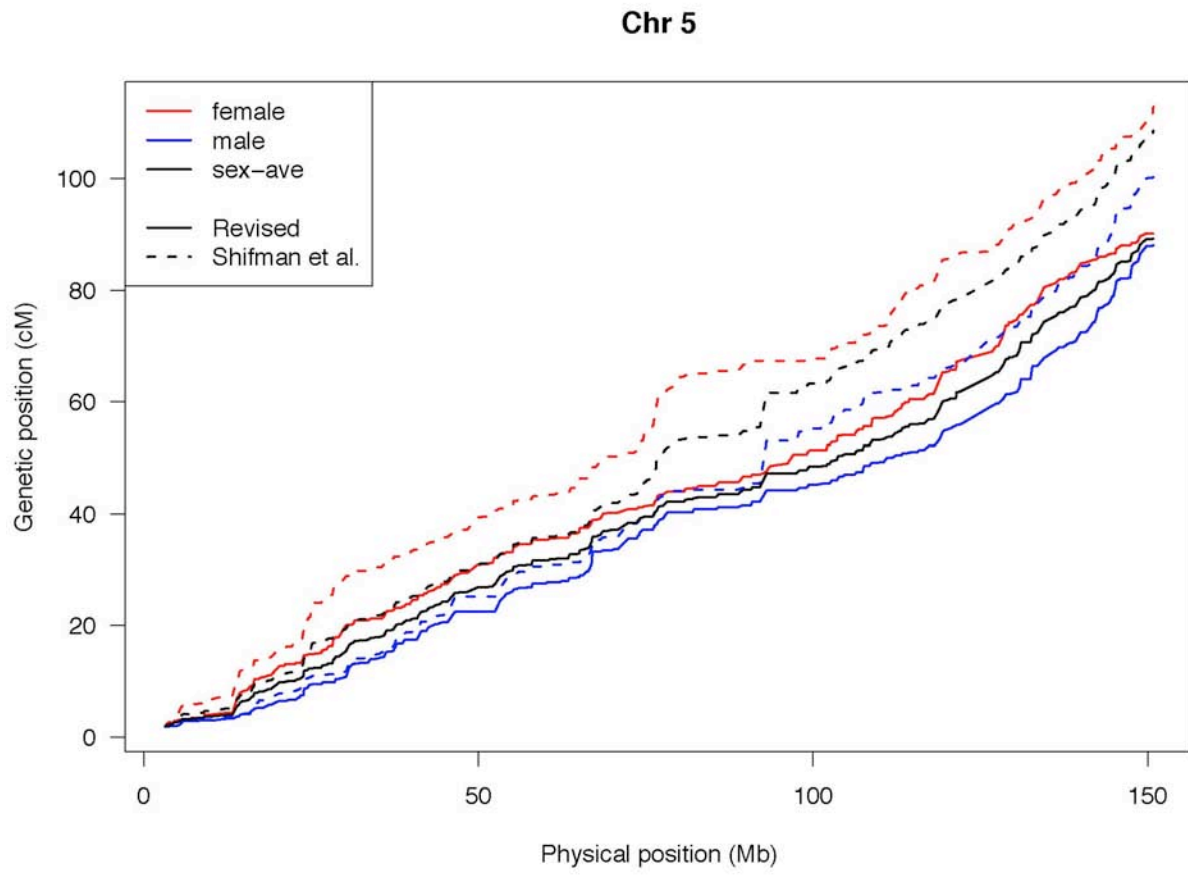

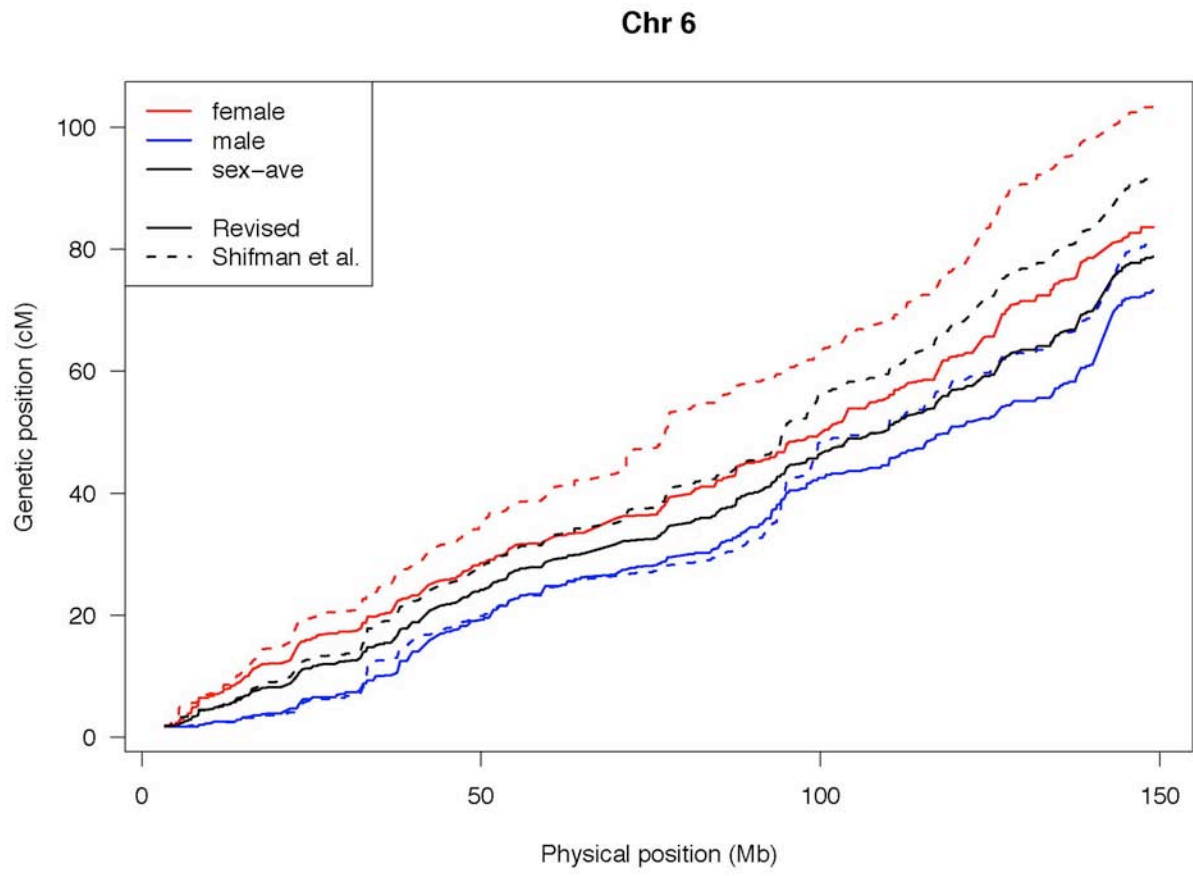

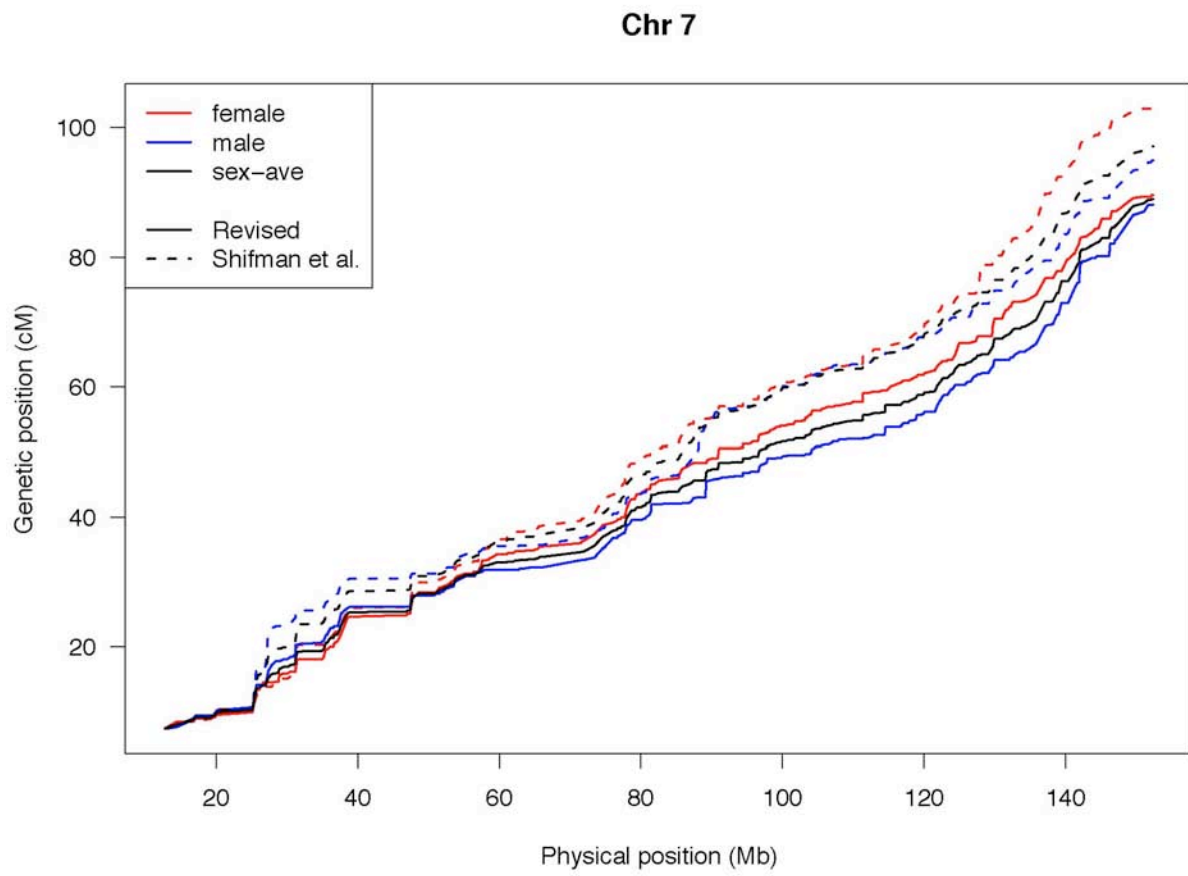

## Chr 8

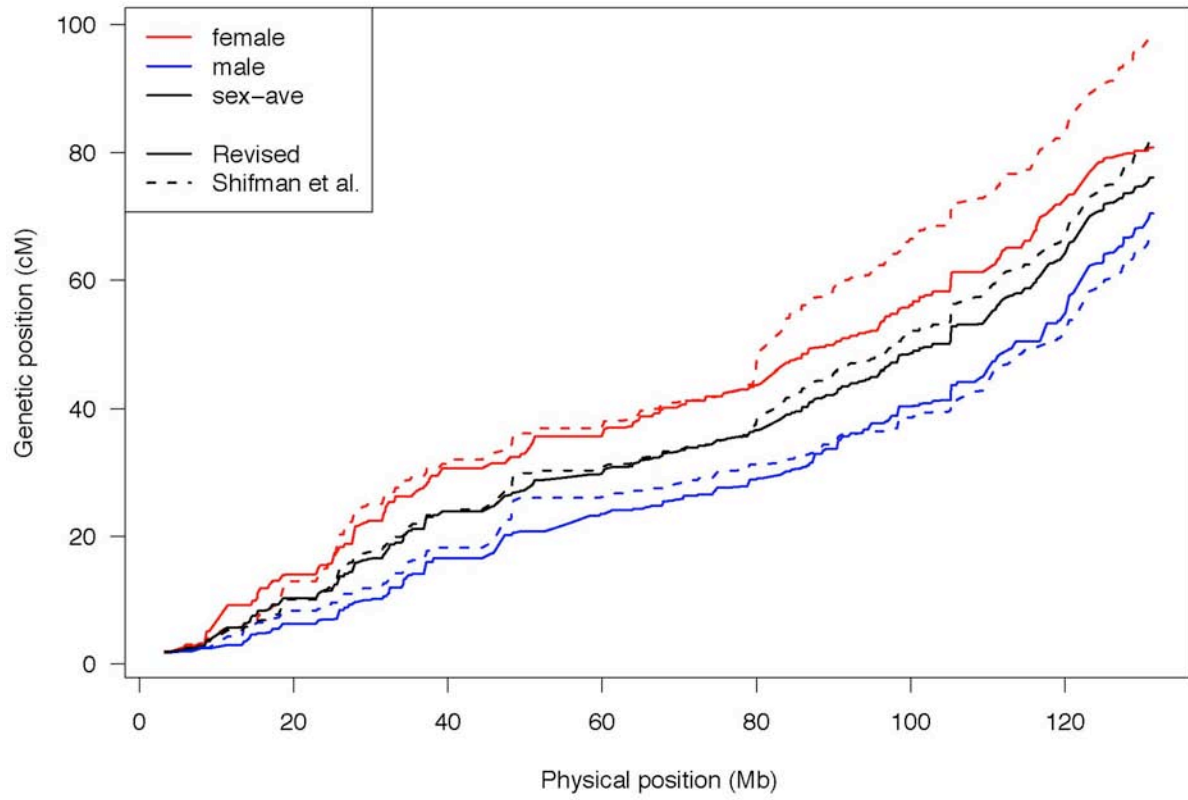



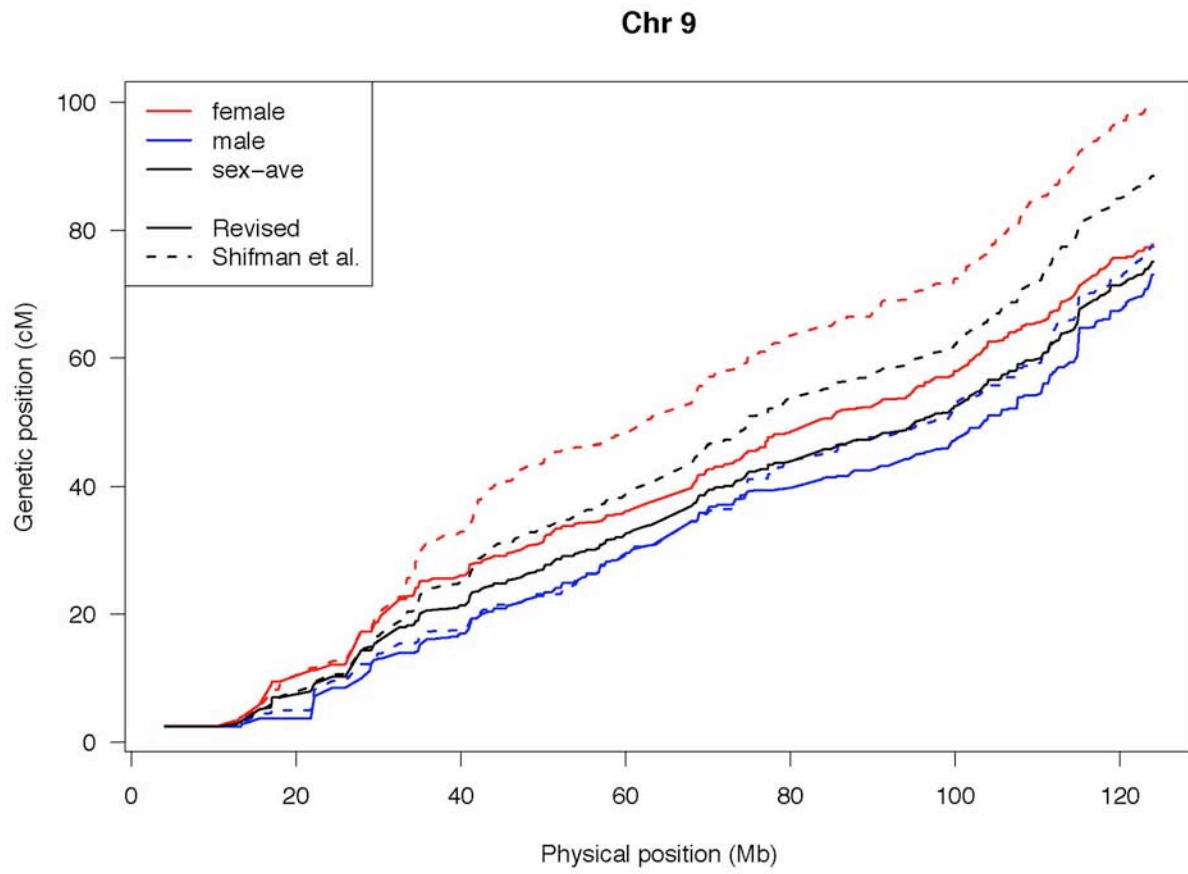

### Chr 10

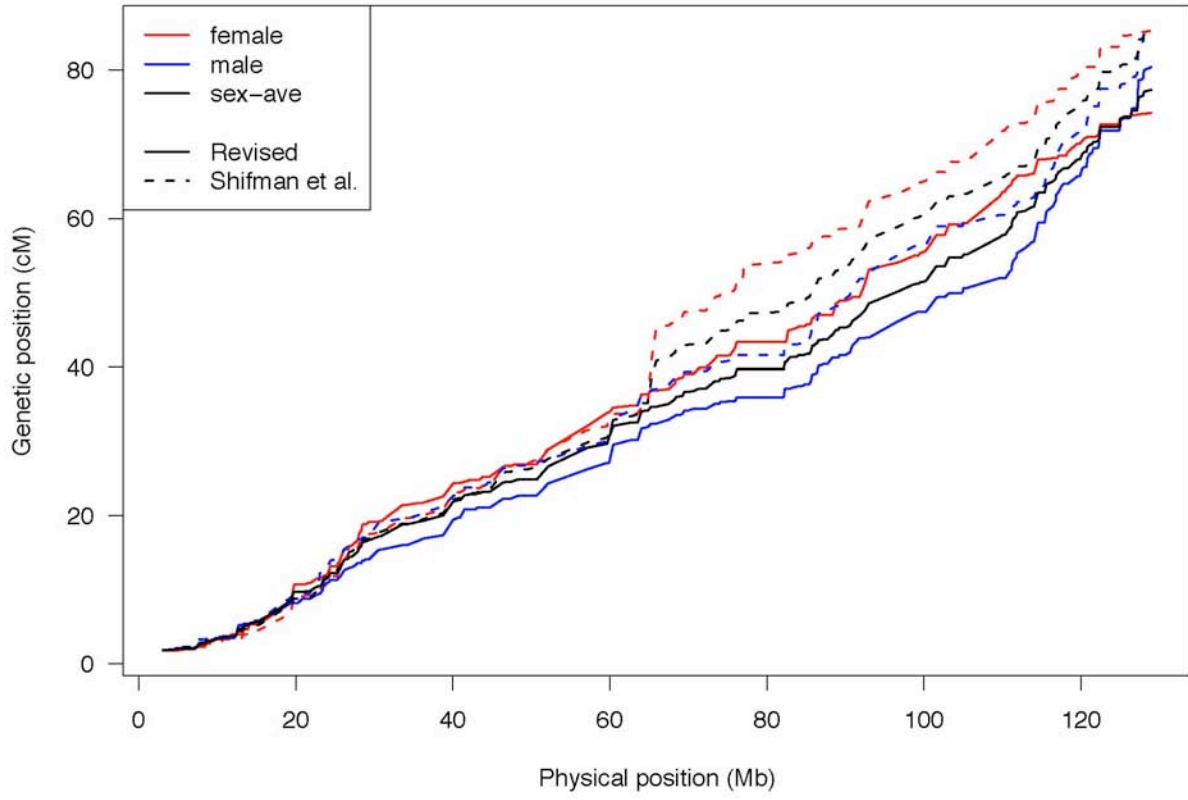

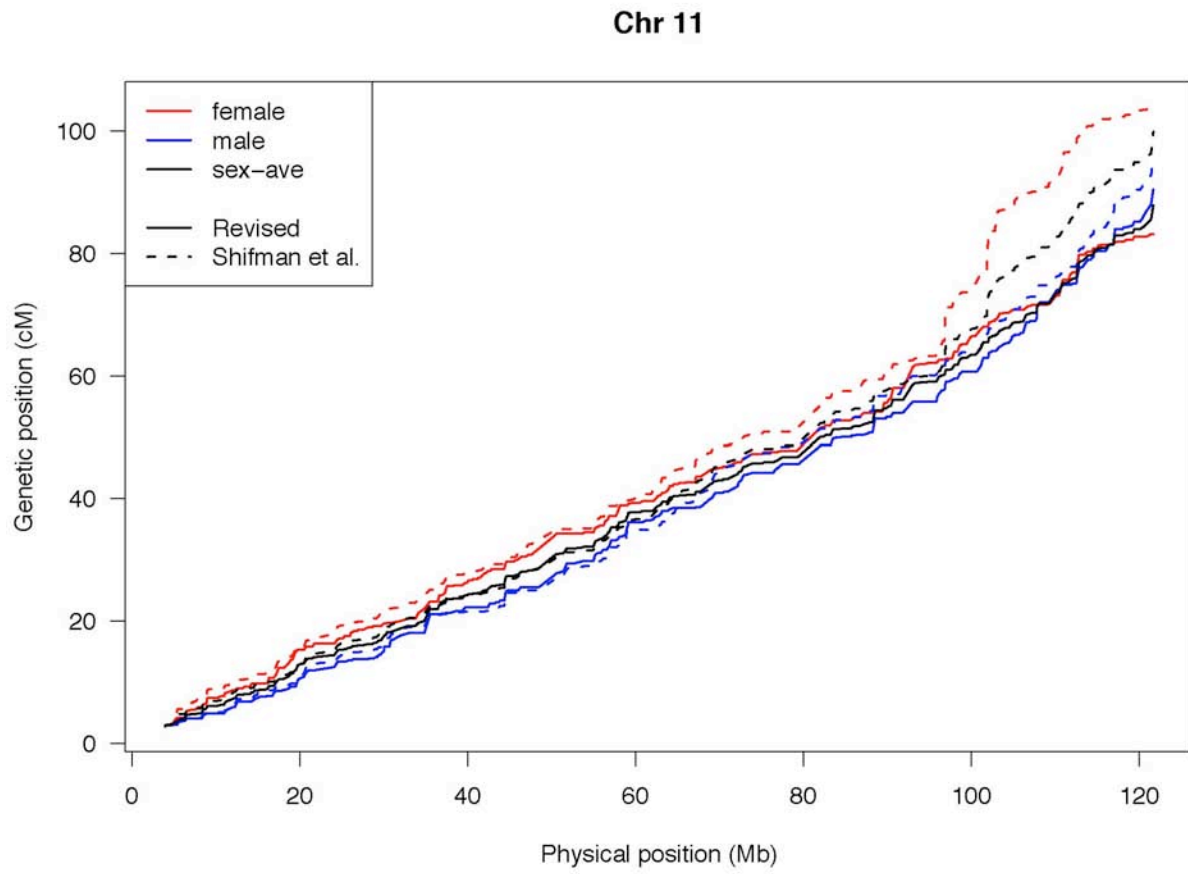

### Chr 12

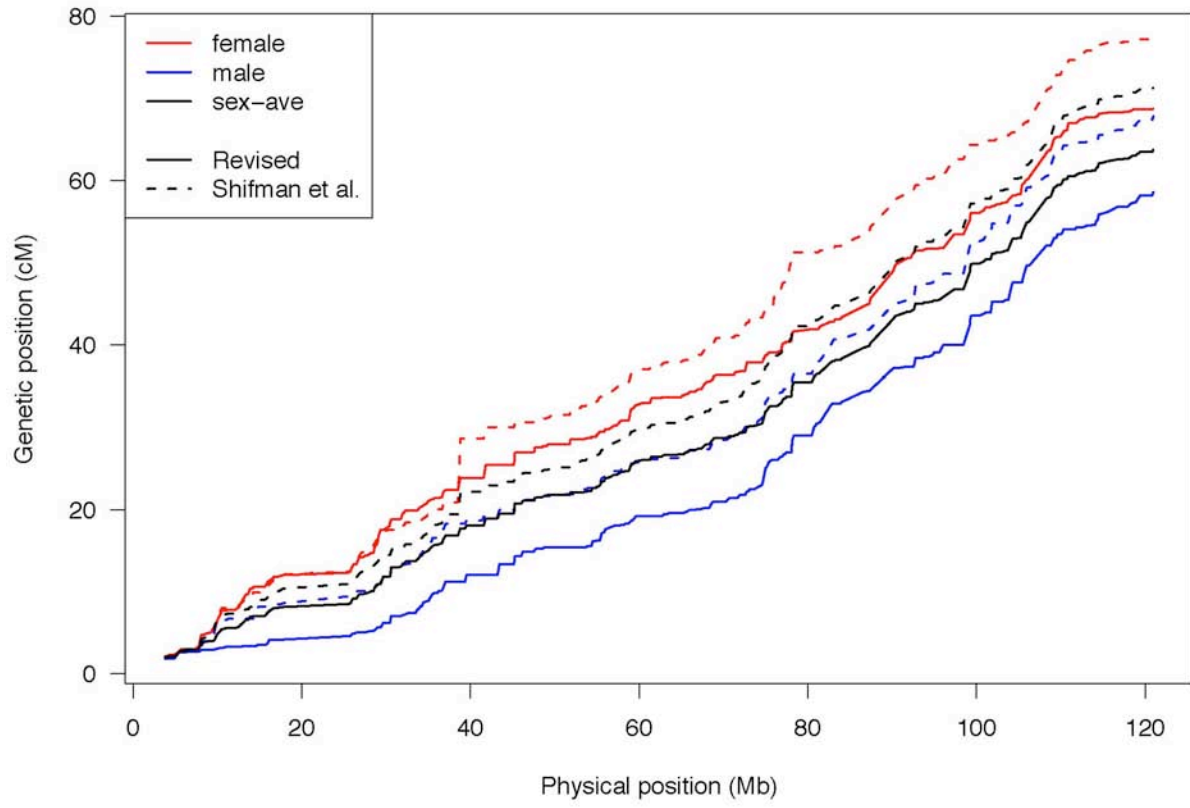

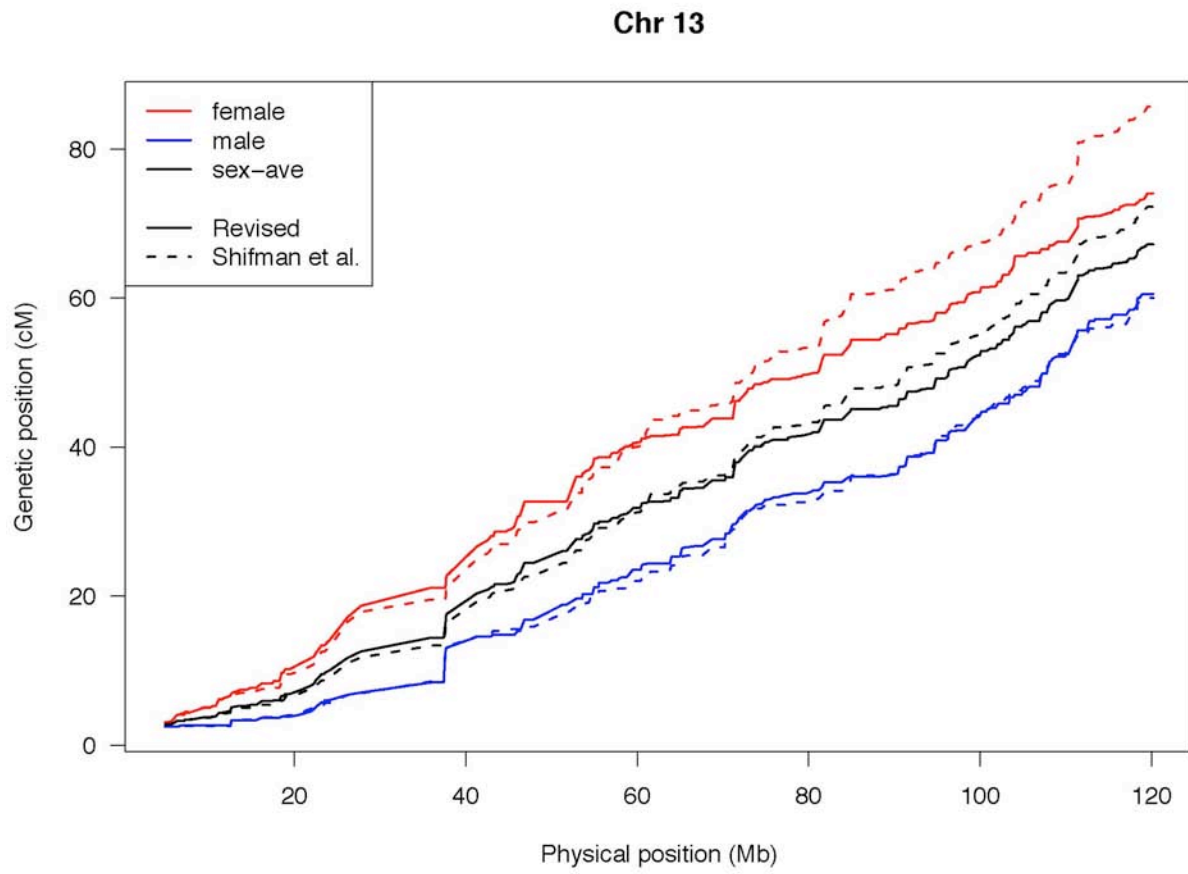

### Chr 14

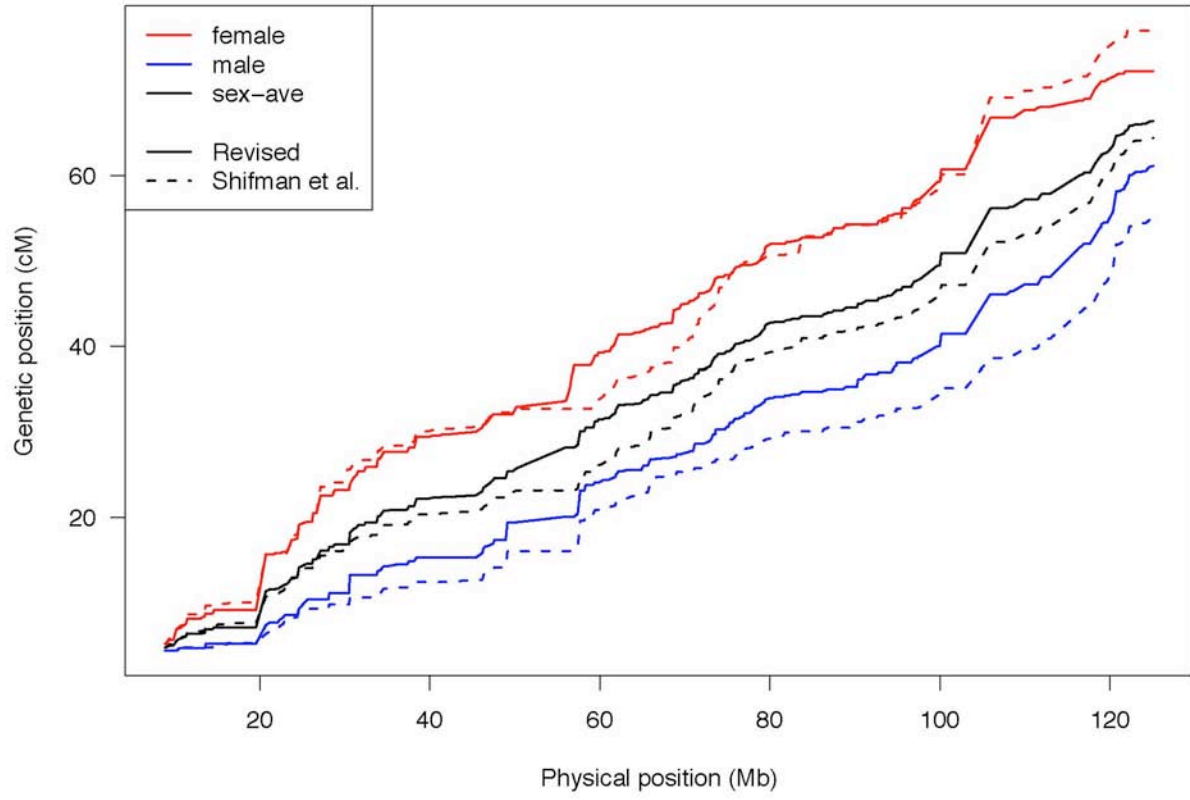

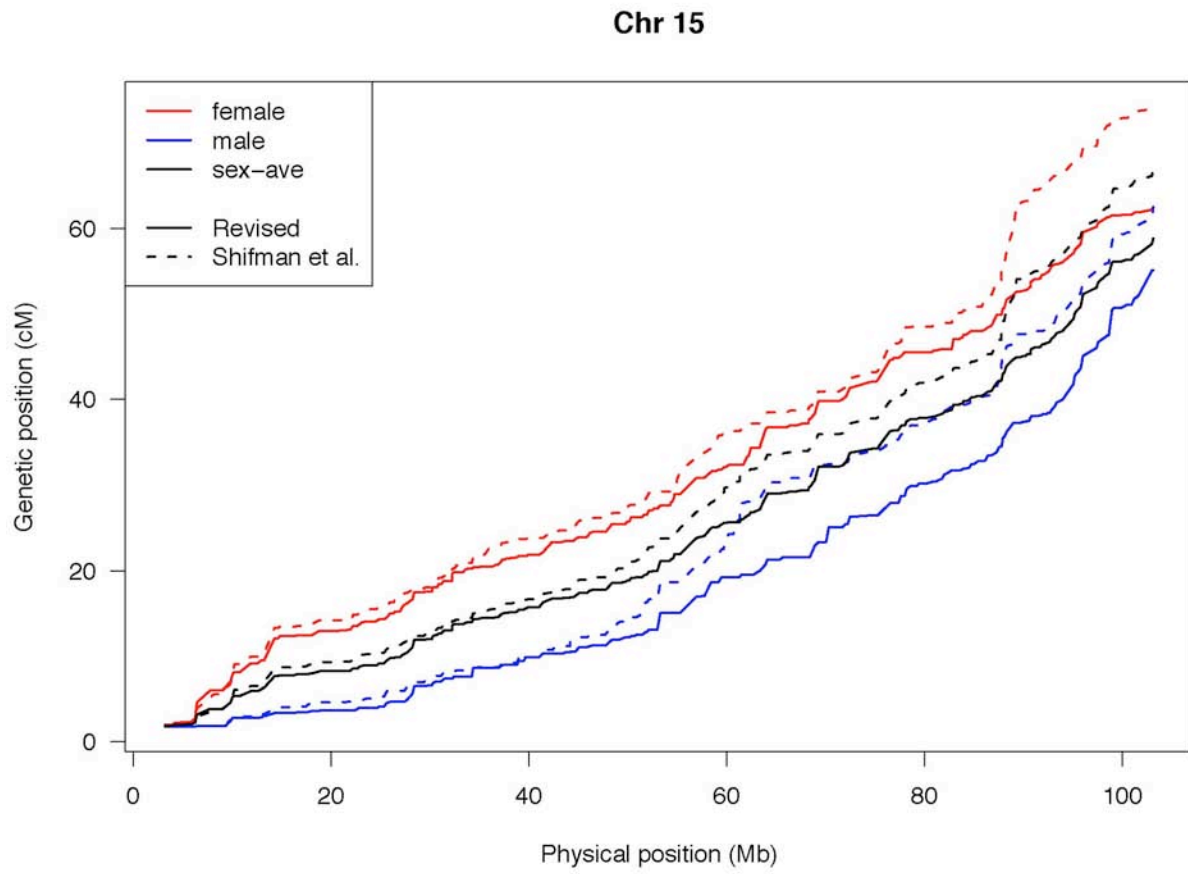

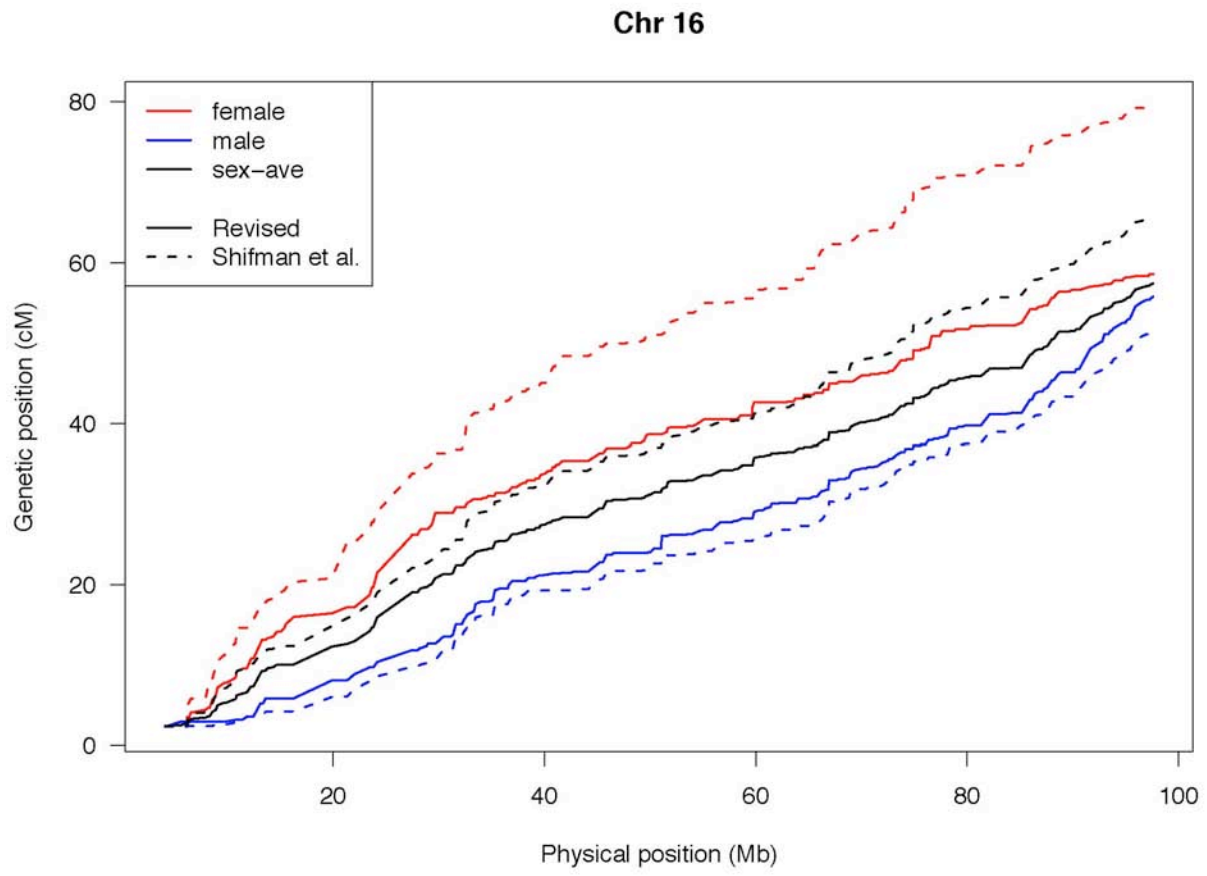



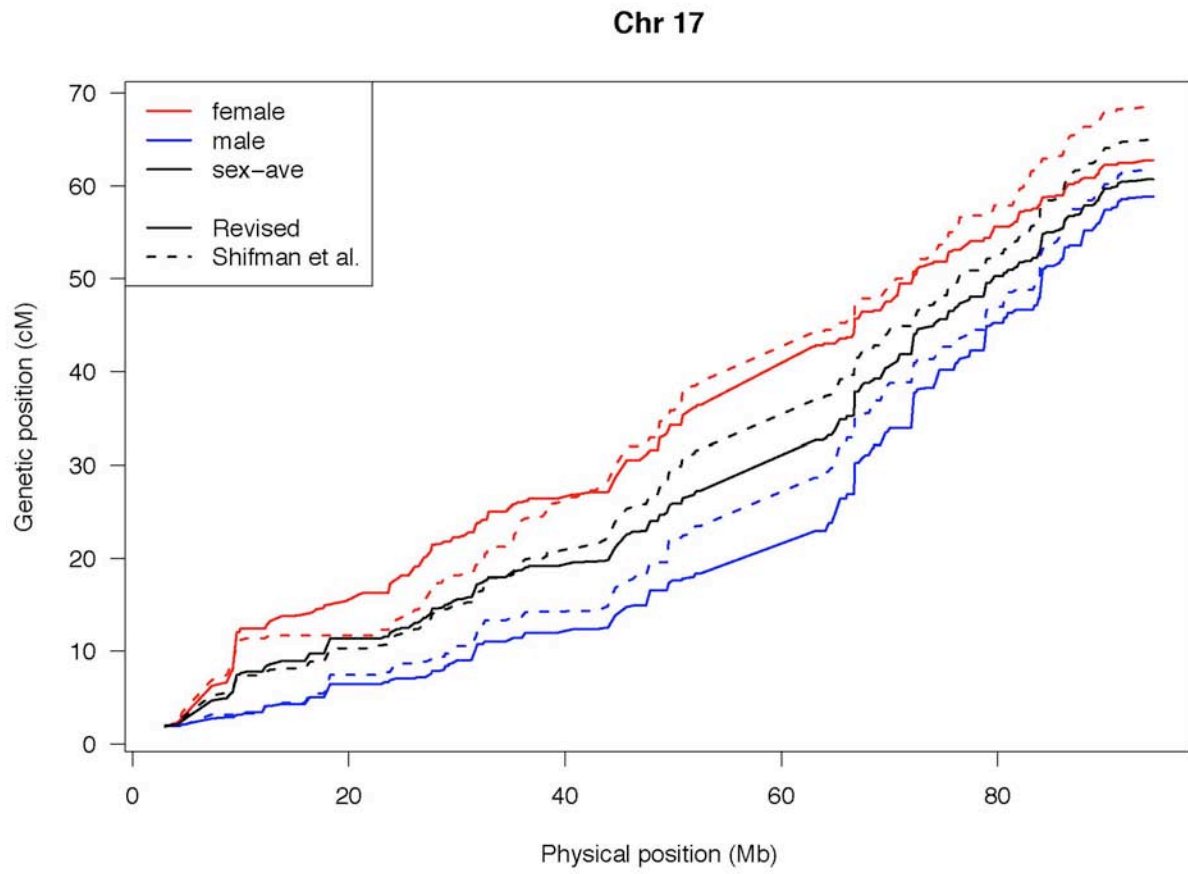

## Chr 18

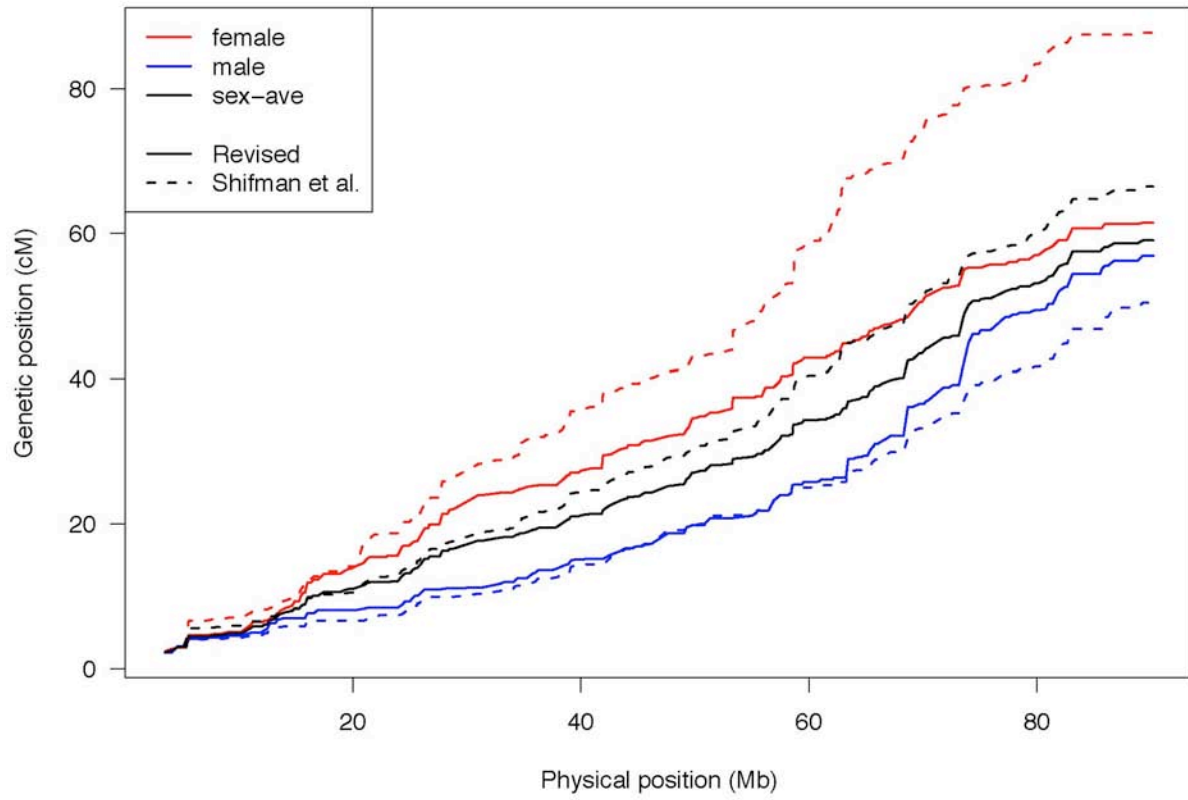

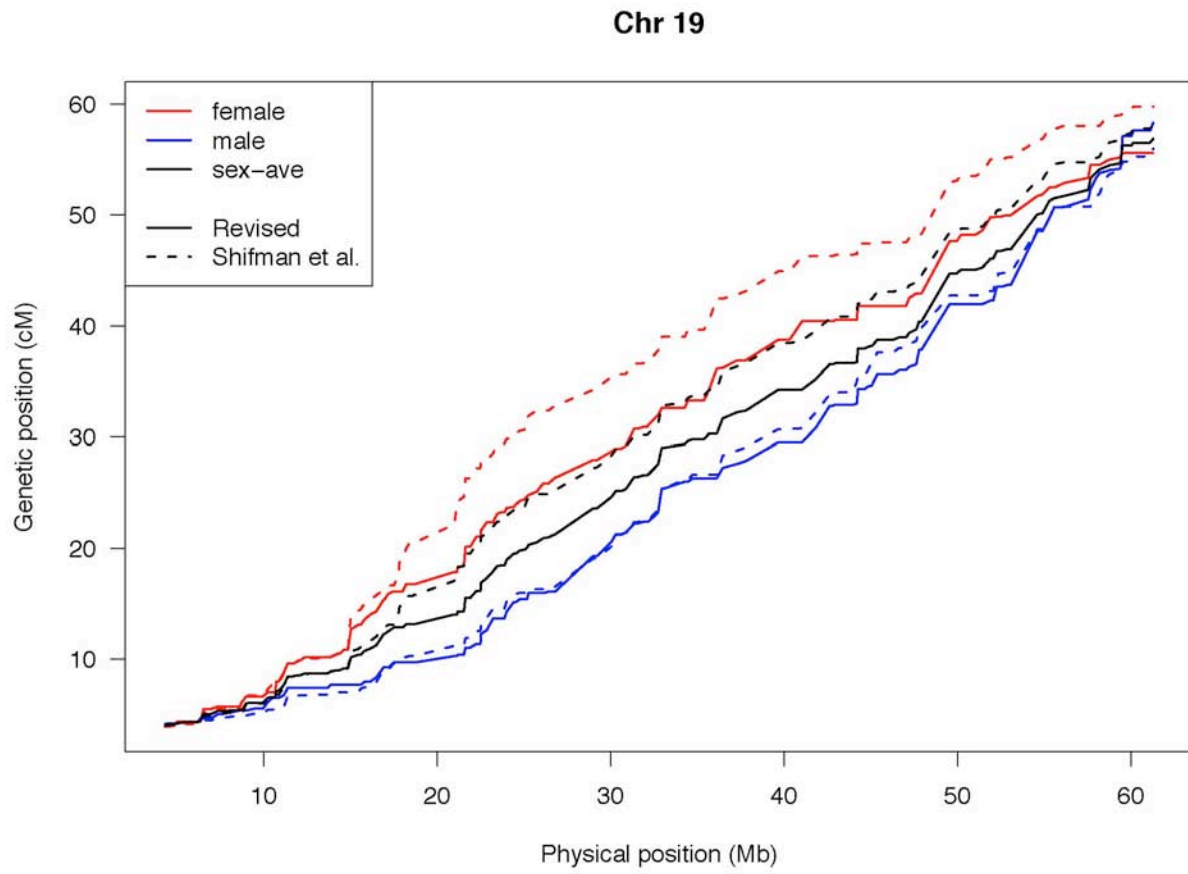

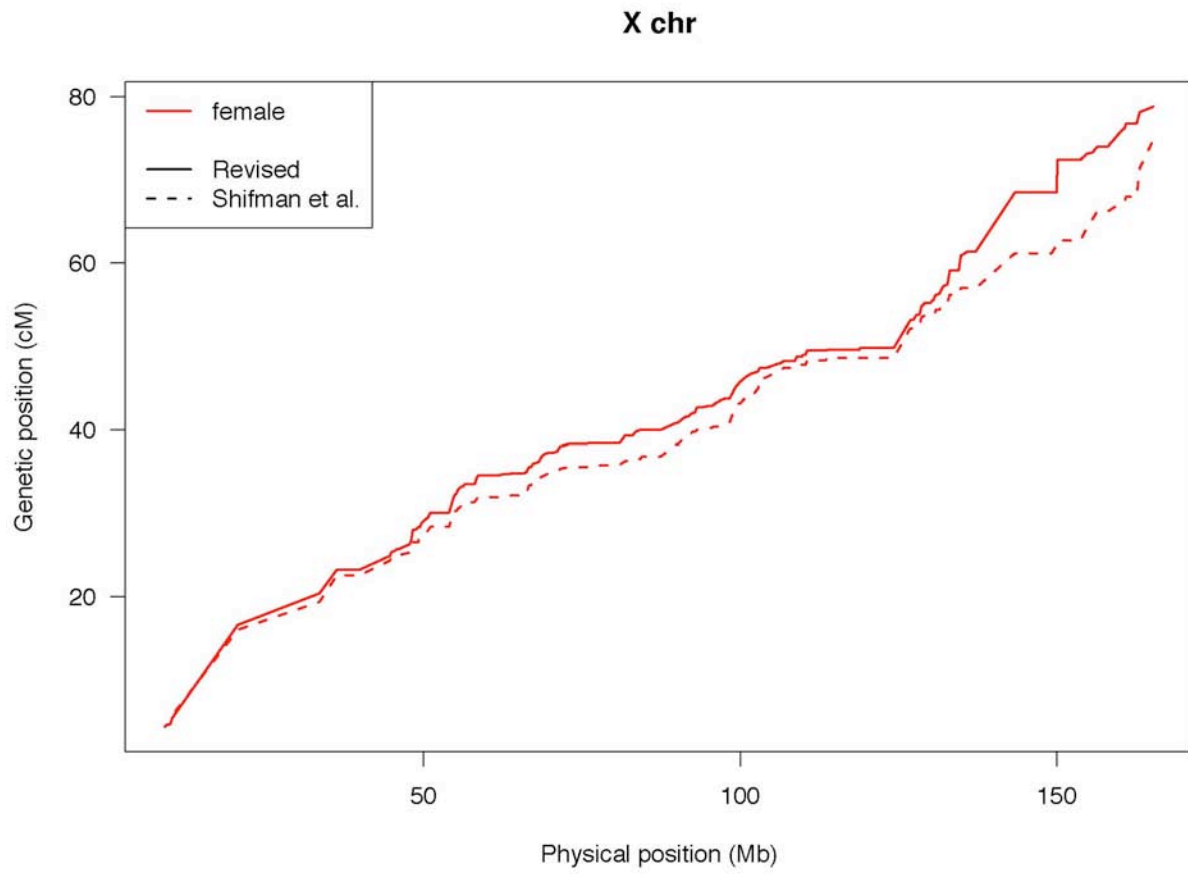

FIGURE S2.—Cumulative genetic maps. Cumulative genetic maps are shown for each chromosome.
