# Supplementary material for: A New Standard Genetic Map for the Laboratory Mouse
Source: Oxford University Press journal article supplement (doi:10.1534/genetics.109.105486), 2009-06-18
Supplement: tables1.pdf [file tables1.pdf]

**TABLE S1****The 6 SNPs from Shifman *et al.* that mapped to multiple locations in mouse genome build 37**

| snpID       | chr | Position_Build37             |
|-------------|-----|------------------------------|
| rs13483060  | 17  | 62204189, 62383134           |
| rs13475989  | 1   | 95771627, 95837777, 95906063 |
| rs13477670  | 4   | 42215061, 42803507           |
| rs6177140   | 4   | 31468011, 31651727           |
| rs3659566   | 5   | 128862845, 129018189         |
| mCV24704879 | 7   | 113221222, 113467886         |
