# Supplementary material for: A New Standard Genetic Map for the Laboratory Mouse
Source: Oxford University Press journal article supplement (doi:10.1534/genetics.109.105486), 2009-06-18
Supplement: tables2.xls [file tables2.xls]

## Sheet: Sheet1
TABLE S2
MIT markers that mapped to multiple locations in mouse genome build 37
Number	MGI Primer Pair ID	Marker name 1	Marker name 2	Marker name 3	MGI Marker Accession ID	Primer 1 sequence	Primer 2 sequence	37 chr	37 start	37 end	product_size
1	MGI:1347807	D14Mit181	D14Mit181		MGI:101062	ACTTCCTCAGTTGTCAGGAAATG	GCTCACAAACACCTGGGC	14	45327174	45327319	146bp
								14	44963115	44963232	118bp
								14	44343041	44343162	122bp
								14	44227160	44227327	168bp
								14	43952379	43952550	172bp
								14	43808472	43808633	162bp
								14	43735176	43735297	122bp
								14	43327536	43327727	192bp
								14	43260463	43260602	140bp
								14	43158217	43158368	152bp
								14	43060667	43060836	170bp
								14	42934440	42934581	142bp
								14	42818457	42818606	150bp
								14	42600702	42600841	140bp
								14	42521655	42521786	132bp
								14	42179896	42180053	158bp
								14	42117124	42117323	200bp
								14	42029163	42029298	136bp
2	MGI:1347849	D10Mit1002	D2Mit273	D16Mit1003	MGI:92144	TCCCAATGCTCTGGATTCTC	GGCGTTAGCAATGTGGAAGT	6	107157646	107157757	112bp
								6	107157646	107157757	112bp
								16	38444709	38444810	102bp
								16	38444709	38444810	102bp
3	MGI:1347875	D18Mit133	D18Mit133.3		MGI:91052	AAAGCAACTGTCTTAGTCACGGTTT	TTTGGTGATGAACAGCAGTATG	1	194146252	194146367	116bp
								18	34487840	34487955	116bp
								19	44526505	44526621	117bp
								2	111413935	111414050	116bp
								3	77355818	77355934	117bp
								5	122436431	122436548	118bp
								6	42389547	42389662	116bp
								6	42388060	42389662	1603bp
								6	26415306	26415421	116bp
								7	4471666	4471781	116bp
								11	63158728	63158843	116bp
								11	60142890	60143005	116bp
4	MGI:700250	D4Mit177	D4Mit177		MGI:92805	ACACGCAAGGTTGATATCAGG	TGTGGGTGTTTATATGTTTGTGTG	4	60725330	60725444	115bp
								4	60503957	60504075	119bp
								4	60222743	60222863	121bp
								4	60070576	60070708	133bp
5	MGI:700298	D7Mit115	D7Mit115		MGI:93931	GCTTCGGTGTCTCTCTCTTTC	ACTGAGGGTCCATGACTTGTG	7	27746638	27746854	217bp
								7	27634302	27634517	216bp
								7	27106115	27106345	231bp
6	MGI:700301	D7Mit118a	D7Mit118		MGI:93934	ATATCCTAAAGAACATTAATGTCCAGA	TGAGCATTCTCTGTTTAGATCTGC	7	50025076	50025218	143bp
								7	50298068	50298206	139bp
								7	50025076	50025218	143bp
								7	50298068	50298206	139bp
7	MGI:700351	D16Mit1001	D5Mit34		MGI:3620104	GGGGAGGTTCTGTCACTAAGG	TCTTGGGACCTGGAAGTCC	5	150356797	150356918	122bp
								16	30878904	30879052	149bp
8	MGI:700364	D12Mit140	D12Mit140.1		MGI:89388	CAACACACAGGGTCCACCTAT	TGAGAGTACAGAAAGGTCCTCCTTT	12	23506099	23506225	127bp
								12	22959813	22959939	127bp
								12	18606940	18607066	127bp
								12	24507139	24507265	127bp
								12	24347272	24347398	127bp
								12	21858398	21858524	127bp
9	MGI:700365	D10Mit216	D7Mit1010		MGI:101304	ATGGCCACCCACTACATATATACA	ATGCGTTGTAGATTTTAGAGATTGC	10	44761363	44761470	108bp
								10	44761363	44761470	108bp
								7	145124859	145124942	84bp
								7	145124859	145124942	84bp
10	MGI:700416	D4Mit24	D4Mit24.2		MGI:92860	AACGTAGTAGGCTGAGTGTGGG	CCTTTATCATCCTGCTGTTTCTG	4	42170938	42171103	166bp
								4	41856560	41856725	166bp
								4	42846797	42846962	166bp
								4	42521829	42521994	166bp
								Un_random	657775	657940	166bp
11	MGI:700449	D1Mit154	D1Mit154		MGI:91528	CTCCTTATAGAATTCATATTGCATCC	GTGAGAAGGAACTCTGAGAACATG	1	195705639	195705784	146bp
								2	152241891	152241986	96bp
12	MGI:700556	D1Mit371.1a	D1Mit371.1	D1Mit371.1b	MGI:3623808	TCAGTAAGAGCACTGGCTGC	CAAGCACACCAGAAGAGGGT	1	180213174	180213285	112bp
								1	153071113	153073324	2212bp
								1	93200281	93200387	107bp
								1	59131643	59131754	112bp
								1	35430302	35430424	123bp
								1	192912192	192912742	551bp
								1	72269048	72271699	2652bp
								1	180213174	180213285	112bp
								1	153071113	153073324	2212bp
								1	93200281	93200387	107bp
								1	59131643	59131754	112bp
								1	35430302	35430424	123bp
								1	192912192	192912742	551bp
								1	72269048	72271699	2652bp
								17	84739808	84739919	112bp
								17	54034899	54035010	112bp
								17	29417669	29418490	822bp
								17	29123459	29123570	112bp
								17	85724030	85724153	124bp
								17	47086915	47087024	110bp
								17	32229816	32230173	358bp
								17	27764416	27764520	105bp
								17	27430145	27430256	112bp
								17	84739808	84739919	112bp
								17	54034899	54035010	112bp
								17	29417669	29418490	822bp
								17	29123459	29123570	112bp
								17	85724030	85724153	124bp
								17	47086915	47087024	110bp
								17	32229816	32230173	358bp
								17	27764416	27764520	105bp
								17	27430145	27430256	112bp
								18	47692530	47695980	3451bp
								18	47692530	47695980	3451bp
								19	61222475	61223712	1238bp
								19	58352216	58352327	112bp
								19	5330191	5332827	2637bp
								19	57893688	57895676	1989bp
								19	61222475	61223712	1238bp
								19	58352216	58352327	112bp
								19	5330191	5332827	2637bp
								19	57893688	57895676	1989bp
								2	162841490	162841601	112bp
								2	127584658	127584769	112bp
								2	127088594	127091359	2766bp
								2	124761132	124764742	3611bp
								2	119466224	119466335	112bp
								2	73164949	73167400	2452bp
								2	154243431	154244838	1408bp
								2	120727783	120728155	373bp
								2	162841490	162841601	112bp
								2	127584658	127584769	112bp
								2	127088594	127091359	2766bp
								2	124761132	124764742	3611bp
								2	119466224	119466335	112bp
								2	73164949	73167400	2452bp
								2	154243431	154244838	1408bp
								2	120727783	120728155	373bp
								3	135160796	135162754	1959bp
								3	128955028	128955630	603bp
								3	126444418	126444529	112bp
								3	135160796	135162754	1959bp
								3	128955028	128955630	603bp
								3	126444418	126444529	112bp
								4	149102721	149104580	1860bp
								4	41114480	41114591	112bp
								4	119014358	119016882	2525bp
								4	149102721	149104580	1860bp
								4	41114480	41114591	112bp
								4	119014358	119016882	2525bp
								10	19781526	19782060	535bp
								10	17951349	17951461	113bp
								10	127072760	127072871	112bp
								10	19781526	19782060	535bp
								10	17951349	17951461	113bp
								10	127072760	127072871	112bp
								5	104015098	104015204	107bp
								5	84624644	84624755	112bp
								5	66097868	66100343	2476bp
								5	143609332	143609443	112bp
								5	93432157	93432268	112bp
								5	77440706	77441161	456bp
								5	104015098	104015204	107bp
								5	84624644	84624755	112bp
								5	66097868	66100343	2476bp
								5	143609332	143609443	112bp
								5	93432157	93432268	112bp
								5	77440706	77441161	456bp
								6	149098246	149100639	2394bp
								6	71045936	71046047	112bp
								6	50361780	50361891	112bp
								6	124656862	124657662	801bp
								6	23069322	23069433	112bp
								6	149098246	149100639	2394bp
								6	71045936	71046047	112bp
								6	50361780	50361891	112bp
								6	124656862	124657662	801bp
								6	23069322	23069433	112bp
								7	52702658	52705771	3114bp
								7	20453999	20454285	287bp
								7	13461590	13461701	112bp
								7	4951402	4951513	112bp
								7	133795203	133795313	111bp
								7	52702658	52705771	3114bp
								7	20453999	20454285	287bp
								7	13461590	13461701	112bp
								7	4951402	4951513	112bp
								7	133795203	133795313	111bp
								8	108107924	108108035	112bp
								8	98344425	98344529	105bp
								8	68784638	68784961	324bp
								8	66743676	66743787	112bp
								8	18911403	18911514	112bp
								8	108107924	108108035	112bp
								8	98344425	98344529	105bp
								8	68784638	68784961	324bp
								8	66743676	66743787	112bp
								8	18911403	18911514	112bp
								9	108989271	108989382	112bp
								9	63963182	63966145	2964bp
								9	119709678	119709789	112bp
								9	95909320	95909431	112bp
								9	108989271	108989382	112bp
								9	63963182	63966145	2964bp
								9	119709678	119709789	112bp
								9	95909320	95909431	112bp
								11	116326344	116328976	2633bp
								11	95578910	95580006	1097bp
								11	52102231	52102337	107bp
								11	32403983	32407600	3618bp
								11	25381303	25381414	112bp
								11	21398128	21398239	112bp
								11	115959199	115959809	611bp
								11	105993632	105993919	288bp
								11	103824733	103824843	111bp
								11	53248161	53252040	3880bp
								11	116326344	116328976	2633bp
								11	95578910	95580006	1097bp
								11	52102231	52102337	107bp
								11	32403983	32407600	3618bp
								11	25381303	25381414	112bp
								11	21398128	21398239	112bp
								11	115959199	115959809	611bp
								11	105993632	105993919	288bp
								11	103824733	103824843	111bp
								11	53248161	53252040	3880bp
								X	90514575	90514685	111bp
								X	12395608	12395719	112bp
								X	157088535	157088646	112bp
								X	100577671	100577782	112bp
								X	91718622	91720314	1693bp
								X	55426186	55427313	1128bp
								X	90514575	90514685	111bp
								X	12395608	12395719	112bp
								X	157088535	157088646	112bp
								X	100577671	100577782	112bp
								X	91718622	91720314	1693bp
								X	55426186	55427313	1128bp
								12	67986624	67986735	112bp
								12	36105987	36106098	112bp
								12	67986624	67986735	112bp
								12	36105987	36106098	112bp
								13	100854341	100857931	3591bp
								13	93926342	93926453	112bp
								13	85998407	85998518	112bp
								13	41070140	41070475	336bp
								13	100854341	100857931	3591bp
								13	93926342	93926453	112bp
								13	85998407	85998518	112bp
								13	41070140	41070475	336bp
								14	121281218	121282275	1058bp
								14	67416468	67416578	111bp
								14	47364860	47364972	113bp
								14	35437327	35437409	83bp
								14	8601866	8602499	634bp
								14	121281218	121282275	1058bp
								14	67416468	67416578	111bp
								14	47364860	47364972	113bp
								14	35437327	35437409	83bp
								14	8601866	8602499	634bp
								15	95547269	95547380	112bp
								15	12204776	12207209	2434bp
								15	81402055	81404948	2894bp
								15	95547269	95547380	112bp
								15	12204776	12207209	2434bp
								15	81402055	81404948	2894bp
								16	4533865	4535738	1874bp
								16	4533865	4535738	1874bp
13	MGI:700655	D4Mit50	D4Mit50	0	MGI:92884	AAGGCAGAAACACAAAAATACATG	TGATGGTGTTCCATATGTCTTATG	4	3194089	3194198	110bp
								8	3002441	3002550	110bp
								15	3011728	3011833	106bp
14	MGI:700672	D13Mit116	D13Mit116.1	0	MGI:89653	GCTCTGATCCAAGAGAGGTTGATA	ACCCAGAACACTGGTGAGTG	13	33502292	33502436	145bp
								13	33432376	33432520	145bp
								13	33357823	33357967	145bp
15	MGI:700688	D3Mit114a	D3Mit114	D3Mit114b	MGI:92380	CAGGTGAAAAATCTCAGAAGGG	ACTCTCATACATACATACACACCTTCA	3	153192482	153192758	277bp
								3	153192482	153192580	99bp
								3	153192482	153192758	277bp
								3	153192482	153192580	99bp
16	MGI:700695	D15Mit78	D15Mit78	0	MGI:90361	ACCCTGACACCATATGGCAG	TCACTTTACATCCTGTTCACATTT	Un_random	2826263	2826350	88bp
								Un_random	2677993	2678094	102bp
17	MGI:700810	D9Mit177a	D9Mit177	D9Mit177b	MGI:94687	CATTATGTGTTGAGAAGATTTGCG	GTGTCCTTGTCTGACCTTTATGG	9	78117475	78117582	108bp
								9	78090992	78091099	108bp
								9	78117475	78117582	108bp
								9	78090992	78091099	108bp
18	MGI:700919	D5Mit347	D5Mit347.1	0	MGI:102075	GAGGCTCATTCCTGTTCCTCTT	AAGGAAACAGAATGAGAGACACAGAC	5	11847355	11847472	118bp
								5	11772294	11772411	118bp
								5	11683844	11683961	118bp
								5	11596791	11596908	118bp
								5	11504421	11504538	118bp
								5	11418234	11418351	118bp
								5	11343287	11343404	118bp
								5	11257765	11257882	118bp
								5	11184815	11184932	118bp
								5	11129476	11129593	118bp
								5	11041950	11042067	118bp
								5	10949586	10949703	118bp
								5	10867807	10867924	118bp
19	MGI:700970	D11Mit243a	D11Mit243	D11Mit243b	MGI:101248	AAAGATTCACCAGGCACCC	GTTCATACTTTGCTTGCAGATCC	11	69854725	69854792	68bp
								11	69854660	69854792	133bp
								11	69854725	69854792	68bp
								11	69854660	69854792	133bp
20	MGI:701087	D4Mit226	D4Mit226.1	0	MGI:92858	CCTGGTCTAGAGAGTGAGTTCCA	TTCTCTTTTTTTTGGGGGGG	4	149908015	149908126	112bp
								10	67747888	67751777	3890bp
								8	38350836	38350923	88bp
								11	5028114	5028198	85bp
								14	70555379	70558101	2723bp
21	MGI:701155	D17Mit259	D17Mit259	0	MGI:106966	CTGTTTGATTGTTTCAGTTTTTGG	GACAAAAGACCCCAACACTACC	17	13551469	13551591	123bp
								17	13257987	13258104	118bp
								17	7532998	7533109	112bp
22	MGI:701169	D14Mit210	D14Mit210	0	MGI:101033	ACTGCTGGCTAGGGAAGACA	CCTTTAGAATTCAGTGCTGATGG	14	26997124	26997224	101bp
								14	26857510	26857610	101bp
								14	26717740	26717840	101bp
23	MGI:701250	D4Mit352a	D4Mit352	D4Mit352b	MGI:107090	TTCCTGCCAGGACTCATAGG	ACAGTCAGGCTTAGGAAGGTAGG	4	115275256	115275368	113bp
								4	115238006	115238111	106bp
								4	115275256	115275368	113bp
								4	115238006	115238111	106bp
24	MGI:701330	D19Mit21	D19Mit21	0	MGI:91230	TTGACAAGGTTTCTAAAGGAAAGG	TGACAAGCAAGCATGACCTC	19	39955817	39955959	143bp
								19	39813777	39813889	113bp
25	MGI:701367	DXMit124a	DXMit124	DXMit124b	MGI:100024	AAGGAGAAGTAGAAGAAAGAAAAGAGG	GGTGTAGCCTCAAAAAAGATGG	X	9094107	9094275	169bp
								X	8912882	8913060	179bp
								X	9094107	9094275	169bp
								X	8912882	8913060	179bp
26	MGI:701461	D8Mit72a	D8Mit72	D8Mit72b	MGI:94440	TCAAGACACTCACCCACAGC	CCAGGGGACCATGAACCT	8	73660754	73660927	174bp
								8	74380495	74380654	160bp
								8	73660754	73660927	174bp
								8	74380495	74380654	160bp
27	MGI:701469	D6Mit97	D6Mit97	0	MGI:93731	AGAAAAGAACAATCATTTGAAAATACC	AAAGGATTGGACAGTGCACC	6	68299004	68299170	167bp
								6	68129144	68129294	151bp
28	MGI:701613	D1Mit426	D1Mit426.2	0	MGI:101340	GACTCAAACTTTTGAGCTCTTGTGAC	ACTGCTGAGTACCAGGTGGG	1	182341840	182342479	640bp
								1	182341840	182342293	454bp
								1	182341840	182342216	377bp
								1	182341840	182342179	340bp
								1	182341840	182342106	267bp
								1	182341840	182342070	231bp
								1	182341840	182341997	158bp
								1	182341840	182341960	121bp
								1	182341840	182341923	84bp
29	MGI:701869	D9Mit343	D9Mit343	0	MGI:105775	TTCATGTTTTTGTGGGATTCC	GAGAAACACACGAGAGACATGC	9	80356806	80356863	58bp
								9	80356746	80356863	118bp
30	MGI:701888	DXMit145.1	DXMit145.1	0	MGI:3614202	CTTCCCCTCAACTGGGTATTG	ACTGCTGTCTGTTGTCTCTCCTC	X	72093926	72094044	119bp
								X	72074508	72074626	119bp
								X	70534875	70534993	119bp
								X	70359600	70359718	119bp
								X	72029736	72029854	119bp
								X	71898880	71898998	119bp
								X	70397457	70397575	119bp
31	MGI:701923	D9Mit37a	D9Mit37	D9Mit37b	MGI:94730	GGAGTGTGCAGGGGAAGATA	TGGATTCTCTCCACCCCTC	9	110665094	110665231	138bp
								9	110665094	110665150	57bp
								9	110665094	110665231	138bp
								9	110665094	110665150	57bp
32	MGI:702120	D7Mit74a	D7Mit74	D7Mit74b	MGI:94096	GACCACCACTGCCTGTTTTT	GGTTGGGCTGTGCATAGG	7	12083141	12083255	115bp
								7	11966729	11966843	115bp
								7	11574526	11574632	107bp
33	MGI:702200	D13Mit116	D13Mit116	0	MGI:89653	GGTTCCCAAACGAACAACAA	AGGCATATTAGAATATAAGGCTCTCTG	13	33502114	33502294	181bp
								13	33432200	33432378	179bp
								13	33357676	33357825	150bp
34	MGI:702292	D15Mit188a	D15Mit188	D15Mit188b	MGI:100987	TTCACTCCAAATCCTCCGAC	GAAGAGGAAATGCAAGCCAG	15	76088327	76088463	137bp
								15	76088284	76088463	180bp
								15	76088327	76088463	137bp
								15	76088284	76088463	180bp
35	MGI:702348	D11Mit155a	D11Mit155	D11Mit155b	MGI:89040	GCAGGGTCCTGTCCAATG	AAAGCACCAATAACACATGGG	11	58651970	58652080	111bp
								11	58641942	58642056	115bp
								11	58651970	58652080	111bp
								11	58641942	58642056	115bp
36	MGI:702354	D14Mit58	D14Mit58	0	MGI:90063	ACAAACACCTGGGCAAAAAC	TCAGGAAATGTGCTGTAATATAGC	14	44343045	44343149	105bp
								14	44227164	44227314	151bp
								14	43952383	43952537	155bp
								14	43808476	43808620	145bp
								14	43735180	43735284	105bp
								14	43510412	43510544	133bp
								14	43327540	43327714	175bp
								14	43260467	43260589	123bp
								14	43158221	43158355	135bp
								14	43060671	43060823	153bp
								14	43003616	43003729	114bp
								14	42934444	42934568	125bp
								14	42818461	42818593	133bp
								14	42659235	42659352	118bp
								14	42600706	42600828	123bp
								14	42521659	42521773	115bp
								14	42402087	42402219	133bp
								14	42179900	42180040	141bp
								14	42117128	42117310	183bp
								14	42029167	42029285	119bp
								14	45327187	45327315	129bp
								14	44963128	44963228	101bp
37	MGI:702420	D10Mit132a	D10Mit132	D10Mit132b	MGI:88751	ACTCCAGGTTTACTGAGCAACC	TGCTGATGTTTTAACAAATGGC	10	83625765	83625907	143bp
								10	83625765	83626096	332bp
								10	83625765	83625907	143bp
38	MGI:702446	D1Mit372a	D1Mit372	D1Mit372b	MGI:101394	GGGAAGTCTTGATGCTTTTCC	GTATGTGCACACACAAACATGC	1	21260101	21260223	123bp
								1	21210206	21210312	107bp
								1	21260101	21260223	123bp
								1	21210206	21210312	107bp
39	MGI:702491	D8Mit27a	D8Mit27	D8Mit27b	MGI:94393	CATACCCTGGAACACCAGCT	AATGCACATAGGCAAAACACC	8	73660682	73660886	205bp
								8	74380536	74380726	191bp
								8	73660682	73660886	205bp
								8	74380536	74380726	191bp
40	MGI:702624	D10Mit183a	D10Mit183	D10Mit183b	MGI:101337	GGTGCCATGGGTAGACATG	CCCCTTTAAGAAAGGAAGTAGTCC	10	22217934	22218081	148bp
								10	22283005	22283143	139bp
								10	22217934	22218081	148bp
								10	22283005	22283143	139bp
41	MGI:702816	D1Mit381b	D1Mit381	D1Mit381a	MGI:3641601	AAACACACACTCATGGCTGC	CTATTAGACTAGCAATCATCAGGGG	1	70304600	70304723	124bp
								1	70304512	70304723	212bp
								1	70304600	70304723	124bp
								1	70304512	70304723	212bp
42	MGI:702819	D17Mit27	D17Mit27	0	MGI:90815	GACCTTGAGACTGAACCAAACC	TCAGGGCTTCTGTGACCTTT	17	13634008	13634159	152bp
								17	13337882	13338027	146bp
								17	7602962	7603135	174bp
43	MGI:702881	D7Mit311a	D7Mit311	D7Mit311b	MGI:102150	CACATTATACACACACAGACATCCA	TGCCCCCATTACTTAATCTCA	7	49958132	49958254	123bp
								7	50358575	50358713	139bp
								7	49958132	49958254	123bp
								7	50358575	50358713	139bp
44	MGI:702904	D2Mit468	D2Mit468	0	MGI:105663	TCCCATGAGTGGATTTGTGA	GGACTCATTGGAGTTTAACTAACAA	2	41406599	41406723	125bp
								2	41406599	41406704	106bp
45	MGI:703007	D15Mit265a	D15Mit265	D15Mit265b	MGI:106953	ACATTAGTCAACTATGCTGGTACTCTG	TTCCTCTCTAATGTCAATTGTTTCA	15	12908564	12908761	198bp
								15	12908564	12908678	115bp
								15	12908564	12908761	198bp
								15	12908564	12908678	115bp
46	MGI:703008	D6Mit1008a	D13Mit121.2	D6Mit1008b	MGI:3613870	CTACTGCTCTAGCACAGGTCCTAC	AAGAAGTCCTGCCTAAACCTCA	6	47113129	47113242	114bp
								6	47094201	47094314	114bp
								6	47113129	47113242	114bp
								6	47094201	47094314	114bp
47	MGI:703086	D8Mit1009a	D9Mit109	D8Mit1009b	MGI:94616	TCCATACCCTACACAAAACAACC	GCGTGTATGTGAGTGCGTG	8	112378388	112378521	134bp
								8	112378374	112378521	148bp
								8	112378360	112378521	162bp
								8	112378388	112378521	134bp
								8	112378374	112378521	148bp
								8	112378360	112378521	162bp
48	MGI:703095	D5Mit210a	D5Mit210	D5Mit210b	MGI:93288	GATGGGTGCATTCATCCTG	TGAAAGTGATTCCTCAGGGG	5	118361028	118361235	208bp
								5	118360957	118361235	279bp
								5	118361028	118361235	208bp
								5	118360957	118361235	279bp
49	MGI:703126	D19Mit18	D19Mit18	0	MGI:91226	TTGACAAGGTTTCTAAAGGAAAGG	ACCTTTCAGCTTGCTCTGGA	19	39955845	39955959	115bp
								19	39813805	39813889	85bp
50	MGI:703162	D15Mit103	D15Mit103	0	MGI:90232	CAGGGCTCTATTACACAGAAAAA	TTATATACTTTGCTGCTCGAATATATG	15	63737446	63737589	144bp
								15	63703880	63704001	122bp
								15	63670476	63670611	136bp
51	MGI:703174	DXMit95a	DXMit95	DXMit95b	MGI:95172	CTGTCAATCTAATTCTCTATGTCTGTG	CTTTCCTGGGTGGCAGTG	X	100263883	100264026	144bp
								X	100207581	100207730	150bp
								X	100263883	100264026	144bp
								X	100207581	100207730	150bp
52	MGI:703184	D12Mit10a	D12Mit10	D12Mit10b	MGI:89343	ATCGTGGGAACAAGACCATC	AGAATTCATGCTTTGCATTGG	12	22736975	22737089	115bp
								12	22160800	22160930	131bp
								12	22736975	22737089	115bp
								12	22160800	22160930	131bp
53	MGI:703185	D12Mit11	D12Mit11	0	MGI:89354	TCCCAAATGGAAGACAGGAA	CCCTCCCATTGCCTTTTAAT	12	24230577	24230701	125bp
								12	23899315	23899439	125bp
								12	19800688	19800830	143bp
								12	23614051	23614175	125bp
								12	18939685	18939855	171bp
54	MGI:703187	D12Mit150a	D12Mit150	D12Mit150b	MGI:89399	CTTGTCAAAATTTCTGTTGTTTTACA	AAAGGATTTTGTCACTAAGACATGG	12	117203083	117203242	160bp
								12	117159543	117159713	171bp
								12	117203083	117203242	160bp
								12	117159543	117159713	171bp
55	MGI:703209	D17Mit64	D17Mit64	0	MGI:90855	CCAATTTCATTCAATTTACCACA	TTAGATGCTAGCACATATCAAAATACA	17	38604596	38604739	144bp
								11	21396273	21396388	116bp
56	MGI:703292	D12Mit281	D12Mit281	0	MGI:106939	GACATTTTACATCAGTGAATGTTTCA	TGACTCAATTGCGTGCATCT	12	24835133	24835269	137bp
								12	22134064	22134204	141bp
								12	23196396	23196542	147bp
								12	22763733	22763871	139bp
								12	18801935	18802031	97bp
								12	18702787	18702919	133bp
								12	18090634	18090758	125bp
57	MGI:703293	D12Mit282a	D12Mit282	D12Mit282b	MGI:106940	GTGTGCCTCAAAATGGCAC	ACCCTCTAGAAAATGGATAATGTCC	12	23045902	23046046	145bp
								12	24987825	24987947	123bp
								12	23045902	23046046	145bp
								12	24987825	24987947	123bp
58	MGI:703357	D14Mit146.2	D14Mit146.2	0	MGI:3613887	AAGGCAGTGCTTCTCAACTTT	ACACATCAGATATCCTGCATATCAG	5	75736819	75736897	79bp
								14	9129440	9129602	163bp
59	MGI:703361	D1Mit53	D1Mit53.2	0	MGI:91703	CTGCACAAGAATCACAAGCA	TCCAAATGAAATCTTTGCCC	1	87496248	87496368	121bp
								1	85267999	85268119	121bp
								1	85107320	85107440	121bp
								1_random	1140423	1140543	121bp
								1_random	771491	771611	121bp
								8_random	35483	35603	121bp
								8_random	66879	66999	121bp
60	MGI:703445	D14Mit140	D14Mit140	0	MGI:89981	TATTCCCCTATTTTACACTTTCCG	ACCTCAATGGATTTTTAAAAGTGG	14	52474863	52475023	161bp
								14	44625841	44625983	143bp
61	MGI:703454	D4Mit113	D4Mit113	0	MGI:92735	AACATCACCAGAAAGACGTGG	GGCTAAAACATTTCCACAAAGC	4	61458462	61458722	261bp
								4	60904555	60904776	222bp
								4	60168062	60168289	228bp
62	MGI:703470	D6Mit374a	D6Mit374	D6Mit374b	MGI:105506	TTCTGGCTCTTAACAGTCTGTCC	TACATATGCCAATGATATTCTCCC	6	134069502	134069641	140bp
								6	134069468	134069641	174bp
								6	134069502	134069641	140bp
								6	134069468	134069641	174bp
63	MGI:703496	D8Mit115	D8Mit115	0	MGI:94293	ACCAAAACATATCTTTAGGTTGGG	ATACTCTGTGAGTGAGTGAGTGAGTG	8	113762643	113762784	142bp
								8	113762639	113762784	146bp
64	MGI:703505	D19Mit136	D19Mit136	0	MGI:106993	GAAACTGTCAAGATGGGGCA	TACATCCAACACTTTCTTCCATATAG	19	57031516	57031664	149bp
								19	57031396	57031664	269bp
								19	57031355	57031664	310bp
65	MGI:703519	D7Mit283	D7Mit283	0	MGI:100230	GGATTCCTAGTCCAAAATGTTCC	CATACTATACCACCACCACCACC	7	128827961	128828073	113bp
								7	128827961	128828070	110bp
66	MGI:703596	DXMit69	DXMit69	0	MGI:95144	TTTATTATGTGGACATGTTCATACATG	TAAATAGCCCATAAATGAAGACAGC	X	131980831	131980965	135bp
								X	131920235	131920369	135bp
67	MGI:703616	D5Mit363	D5Mit363	0	MGI:102092	CTGTATGTGCCTCTCCAGTATG	GAGTATGTGAGTGTATGCATGTGTG	5	104568220	104568469	250bp
								5	104568220	104568371	152bp
68	MGI:703676	D6Mit42	D6Mit42	0	MGI:93674	CCTCACCTTGCCTCTCTTTG	TTTTGCCCAGAGTAGGCG	6	47727612	47727800	189bp
								6	47721379	47721553	175bp
								6	47716997	47717190	194bp
								6	47712733	47712891	159bp
								6	47711458	47712891	1434bp
								6	47707147	47707303	157bp
								6	47702307	47702463	157bp
								6	47697944	47698102	159bp
								6	47693631	47693787	157bp
								6	47689360	47689516	157bp
								6	47634750	47634920	171bp
								6	47630429	47630599	171bp
								6	47626121	47626293	173bp
								6	47621770	47621958	189bp
								6	47617472	47617644	173bp
								6	47613118	47613296	179bp
								6	47608815	47608987	173bp
								6	47604510	47604680	171bp
69	MGI:703713	D13Mit246a	D13Mit246	D13Mit246b	MGI:101089	AGGAAATAAAGAAAAGGTATACACACA	AAAGCATTGCAGTGAAACCC	13	50385173	50385356	184bp
								13	50668012	50668185	174bp
								13	50385173	50385356	184bp
								13	50668012	50668185	174bp
70	MGI:703729	D17Mit195a	D17Mit195	D17Mit195b	MGI:100857	TAGCCTTTGCACCACTACCC	CATATTTATTTACAGTCACTGGGGC	17	8340035	8340127	93bp
								17	7183779	7183857	79bp
								17	8340035	8340127	93bp
								17	7183779	7183857	79bp
71	MGI:703751	D3Mit1	D3Mit1	0	MGI:92363	TGTGCACAGGGGTACATACA	TCATTTTCTTCCTCCCCCTC	3	25424406	25424524	119bp
								Y_random	19419048	19419187	140bp
								Y_random	18613958	18614099	142bp
								Y_random	41562540	41562677	138bp
								Y_random	38775806	38775945	140bp
								Y_random	30666807	30666944	138bp
								Y_random	1029843	1029986	144bp
72	MGI:703792	D12Mit102a	D12Mit102	D12Mit102b	MGI:89346	TGCAGAAAGACAGACAGAAAGTG	TCTGCCTCATTGGATCACTG	12	105540400	105540598	199bp
								12	105536654	105540598	3945bp
								12	105536654	105536786	133bp
								12	105540400	105540598	199bp
								12	105536654	105540598	3945bp
								12	105536654	105536786	133bp
73	MGI:703823	D10Mit22	D10Mit22	0	MGI:88807	TGATGTGTTTGGACAACTGACA	GTAGATGTTCTTGGGGAAGGC	10	81478755	81478899	145bp
								10	81345268	81345392	125bp
								10	81186158	81186300	143bp
74	MGI:703924	DXMit146a	DXMit146	DXMit146b	MGI:100002	AACTCACCAACTCACACACCC	ATTTCCCTGCTTGTGGTGAC	X	70477137	70477284	148bp
								X	71981938	71982065	128bp
								X	70477137	70477284	148bp
								X	71981938	71982065	128bp
75	MGI:704001	DXMit77	DXMit77	0	MGI:95153	TACCGAAAAACAAACAAACAAA	GATCTAGGGTTTGATTGGTTGG	X	76610885	76611001	117bp
								X	76610881	76611001	121bp
								X	76610677	76611001	325bp
76	MGI:704030	D1Mit82	D1Mit82	0	MGI:91734	AAGATTATAGGAAACACCACCATG	TTGAATATGATCAGCCTTTGTCA	1	85080246	85080432	187bp
								1	87523993	87524195	203bp
								1	87394020	87394221	202bp
								1	85166931	85167136	206bp
								1_random	789563	789771	209bp
								1_random	639025	639215	191bp
								1_random	512455	512643	189bp
77	MGI:704078	D13Mit50	D13Mit50	0	MGI:89777	CTTCCTTCTTTGCTCTCTTCTCC	CCTCCCCTGTGCTGAATAAA	13	62099480	62099675	196bp
								13	61891027	61891220	194bp
								13	62499177	62499342	166bp
78	MGI:704163	D12Mit1011a	D17Mit99	D12Mit1011b	MGI:3652494	CCTTCACACAGGTGTTGTGG	TATATGAGTGTGTGGGTAATATTTGTG	12	89583045	89583133	89bp
								12	89353505	89353565	61bp
								12	89583045	89583133	89bp
								12	89353505	89353565	61bp
								12	89583045	89583133	89bp
								12	89353505	89353565	61bp
79	MGI:704164	D17Mit98a	D17Mit98	D17Mit98b	MGI:90891	TTTGTGAGTATATTTGTGATGTGTGG	GTATGCTCAATTCTATTGGGTGC	17	7226696	7226955	260bp
								17	8297032	8297291	260bp
								17	7226696	7226955	260bp
								17	8297032	8297291	260bp
80	MGI:704165	D3Mit262	D3Mit262.1	0	MGI:100573	CCTAGTCAGCCATCATTGGG	ATGCTATTCCGAAAGTTCCCTATACC	1	161046425	161046572	148bp
								1	124838372	124838520	149bp
								1	119860860	119861009	150bp
								1	77831300	77831446	147bp
								1	74757588	74757735	148bp
								1	63720969	63721115	147bp
								1	28773185	28773332	148bp
								1	23870389	23870548	160bp
								1	19930531	19930682	152bp
								1	10654354	10654501	148bp
								1	10615833	10615979	147bp
								1	196425361	196425511	151bp
								1	154321420	154321574	155bp
								1	140953684	140953826	143bp
								1	135708317	135708464	148bp
								1	112650213	112650360	148bp
								1	110684965	110685112	148bp
								1	97378858	97379005	148bp
								1	66615484	66618569	3086bp
								1	63821630	63821777	148bp
								1	40212176	40212322	147bp
								1	25340498	25340645	148bp
								1	22915741	22915888	148bp
								17	88772869	88773016	148bp
								17	65784832	65784979	148bp
								17	51449589	51449736	148bp
								17	69326655	69326806	152bp
								17	51522633	51522780	148bp
								17	49084727	49084861	135bp
								17	33106463	33106610	148bp
								18	56430858	56431006	149bp
								18	50680412	50680558	147bp
								18	70029875	70030014	140bp
								18	47158409	47158556	148bp
								18	30592068	30592185	118bp
								19	43391470	43391617	148bp
								19	35756812	35756959	148bp
								19	15172265	15172409	145bp
								19	13270058	13270206	149bp
								19	39240059	39240206	148bp
								19	30686918	30687065	148bp
								19	9524837	9524985	149bp
								19	8507410	8507556	147bp
								2	110783612	110783759	148bp
								2	12499712	12501541	1830bp
								2	12499712	12499860	149bp
								2	7576833	7576985	153bp
								2	178730706	178730858	153bp
								2	140144968	140145115	148bp
								2	121816824	121816971	148bp
								2	78388578	78388736	159bp
								2	13236939	13237086	148bp
								3	147552153	147552301	149bp
								3	139276576	139276723	148bp
								3	114121583	114121730	148bp
								3	82474551	82474698	148bp
								3	68713884	68714032	149bp
								3	32250881	32251028	148bp
								3	14277695	14277842	148bp
								3	9045925	9046565	641bp
								3	152374191	152374337	147bp
								3	149532147	149532294	148bp
								3	149279784	149279934	151bp
								3	130004928	130005079	152bp
								3	56144303	56144450	148bp
								3	47420899	47421046	148bp
								4	109238622	109238769	148bp
								4	102053950	102054096	147bp
								4	91594047	91594195	149bp
								4	81915380	81915529	150bp
								4	76544466	76544613	148bp
								4	69050679	69050826	148bp
								4	68763960	68764107	148bp
								4	65693294	65693441	148bp
								4	64641025	64641161	137bp
								4	40563788	40563936	149bp
								4	20925431	20925578	148bp
								4	10563983	10564128	146bp
								4	142466781	142466926	146bp
								4	64570991	64571138	148bp
								4	63869728	63869875	148bp
								4	55841156	55841303	148bp
								4	39099141	39099288	148bp
								10	128234271	128234418	148bp
								10	68765042	68765191	150bp
								10	64364114	64364251	138bp
								10	46483717	46483864	148bp
								10	36385998	36386145	148bp
								10	97960585	97960730	146bp
								10	72354628	72354776	149bp
								10	58664698	58664845	148bp
								10	29214533	29214680	148bp
								5	102664216	102664364	149bp
								5	69710837	69710984	148bp
								5	65675275	65675422	148bp
								5	43825632	43825779	148bp
								5	19988177	19988319	143bp
								5	4679579	4679727	149bp
								5	127351550	127351697	148bp
								5	83604923	83605067	145bp
								5	36840685	36840833	149bp
								5	21569900	21570046	147bp
								5	7477274	7477421	148bp
								5	6207392	6207538	147bp
								6	103248376	103248523	148bp
								6	78520699	78520852	154bp
								6	76673487	76673633	147bp
								6	73818215	73818362	148bp
								6	67672183	67672329	147bp
								6	62060952	62061091	140bp
								6	30791719	30791867	149bp
								6	138857509	138857656	148bp
								6	137817609	137817764	156bp
								6	127187781	127187928	148bp
								6	76724325	76724503	179bp
								6	62598497	62598644	148bp
								6	59328783	59328931	149bp
								6	58629823	58629969	147bp
								6	52926556	52926702	147bp
								6	26797671	26797818	148bp
								6	21494320	21494467	148bp
								7	116444200	116444346	147bp
								7	115782343	115783503	1161bp
								7	79237800	79237947	148bp
								7	72687304	72687450	147bp
								7	72263786	72263933	148bp
								7	62318992	62319129	138bp
								7	54741132	54741277	146bp
								7	54703702	54703847	146bp
								7	18453674	18453821	148bp
								7	5530588	5530735	148bp
								7	147418714	147418861	148bp
								7	135793504	135793650	147bp
								7	77411570	77411705	136bp
								7	64976232	64976379	148bp
								7	61476608	61476746	139bp
								7	58699862	58700009	148bp
								7	14108417	14108566	150bp
								8	100757067	100757215	149bp
								8	96928852	96928993	142bp
								8	75396575	75396721	147bp
								8	50395538	50395685	148bp
								8	41873358	41873505	148bp
								8	38808795	38808942	148bp
								8	31704393	31704540	148bp
								8	100303295	100303430	136bp
								8	88577988	88578136	149bp
								8	76811372	76813261	1890bp
								8	52028540	52028687	148bp
								8	28774033	28774180	148bp
								9	101072860	101073006	147bp
								9	86327177	86327324	148bp
								9	81657162	81657309	148bp
								9	80091773	80091910	138bp
								9	74024023	74025150	1128bp
								9	68664627	68664774	148bp
								9	8654336	8654470	135bp
								9	3374454	3374602	149bp
								9	97319367	97319514	148bp
								9	89234011	89234156	146bp
								11	121763638	121767024	3387bp
								11	121763638	121763784	147bp
								11	40861682	40861837	156bp
								11	32346907	32347053	147bp
								11	27276133	27276281	149bp
								11	110596971	110597118	148bp
								11	73917307	73917455	149bp
								11	12472874	12473021	148bp
								X	160236065	160236212	148bp
								X	159930936	159931083	148bp
								X	159831924	159834702	2779bp
								X	159831924	159832072	149bp
								X	155224036	155224183	148bp
								X	119186114	119186260	147bp
								X	114609000	114609152	153bp
								X	102930344	102930491	148bp
								X	79275093	79275240	148bp
								X	73457161	73457308	148bp
								X	72285714	72285854	141bp
								X	21226149	21226296	148bp
								X	5384158	5386039	1882bp
								X	162672842	162672978	137bp
								X	162539308	162539458	151bp
								X	157880972	157881118	147bp
								X	154978093	154978240	148bp
								X	142531166	142531313	148bp
								X	128415425	128415571	147bp
								X	105965862	105966008	147bp
								X	103594397	103594543	147bp
								X	101323949	101324096	148bp
								X	66114418	66114565	148bp
								X	58707228	58709220	1993bp
								X	55072036	55072183	148bp
								X	50801247	50801393	147bp
								X	44215627	44215772	146bp
								X	5589775	5589922	148bp
								12	54239526	54239674	149bp
								12	51499668	51501324	1657bp
								12	36675640	36675787	148bp
								12	8210869	8211016	148bp
								12	97288609	97288755	147bp
								12	93245484	93245630	147bp
								12	83991902	83992049	148bp
								12	79860754	79860923	170bp
								12	58588638	58588786	149bp
								12	33493752	33493902	151bp
								12	6182249	6183370	1122bp
								12	6181619	6183370	1752bp
								13	116866301	116866447	147bp
								13	111945630	111945777	148bp
								13	106901174	106901322	149bp
								13	87554286	87554433	148bp
								13	64458500	64458646	147bp
								13	101087788	101087942	155bp
								13	101017425	101017573	149bp
								13	82692104	82692250	147bp
								13	16064170	16064316	147bp
								13	9356061	9356207	147bp
								14	37512205	37512349	145bp
								14	101464317	101464459	143bp
								14	94380973	94381123	151bp
								14	92034666	92034812	147bp
								14	81850990	81851137	148bp
								14	80107499	80107646	148bp
								14	69350498	69350645	148bp
								14	51099286	51099431	146bp
								14	38739079	38739231	153bp
								15	4524199	4524340	142bp
								15	93192134	93192288	155bp
								15	65191102	65192030	929bp
								15	61034431	61034576	146bp
								15	39088152	39090289	2138bp
								15	23665810	23665958	149bp
								15	22164113	22164260	148bp
								15	16532949	16533096	148bp
								15	13357758	13357904	147bp
								16	88722548	88722695	148bp
								16	84502271	84502424	154bp
								16	84414315	84414466	152bp
								16	78765160	78765307	148bp
								16	57758224	57758382	159bp
								16	41740878	41741025	148bp
								16	3675035	3675181	147bp
								16	84534882	84535029	148bp
								16	80544438	80544585	148bp
								16	56738470	56738617	148bp
81	MGI:704277	D7Mit346	D7Mit346	0	MGI:105482	CTCCTTTTTGGTACATATATACACACA	ACACTGGAGAGCCAGGAGAA	6	125184719	125185494	776bp
								7	65990470	65990564	95bp
82	MGI:704392	D13Mit124	D13Mit124	0	MGI:89661	CTGTTTTAATATGGGGGAGAGG	TGACAAACCAATCTTTCAGGC	3	25063764	25063855	92bp
								11	29777217	29777304	88bp
								X	17380931	17381018	88bp
								13	67216005	67216139	135bp
83	MGI:704397	D13Mit121	D13Mit121	0	MGI:89658	TCCCTGAGTACTGGTTTGGC	ACAGTTGCAGTAAGTATCAGCAGG	6	47112999	47113126	128bp
								6	47094071	47094198	128bp
84	MGI:704450	D12Mit234	D12Mit234.1	0	MGI:101136	AACCGTGGACTGAAACCATG	CAAGTGCTGGGTTTTAGGGAC	12	24201900	24202093	194bp
								12	23870668	23870861	194bp
								12	21973632	21973849	218bp
								12	21697018	21697235	218bp
								12	19911390	19911583	194bp
								12	19768401	19768594	194bp
								12	23642629	23642822	194bp
								12	23108246	23108439	194bp
								12	20977244	20977437	194bp
								12	20601987	20602180	194bp
								12	20507275	20507492	218bp
								12	20407156	20407349	194bp
								12	20049956	20050131	176bp
								12	19476276	19476493	218bp
								12	19374769	19374962	194bp
								12	19276332	19276549	218bp
								12	18965543	18965736	194bp
								12	18502258	18502451	194bp
								12	18123329	18123522	194bp
85	MGI:704503	D5Mit261	D5Mit261	0	MGI:100455	AAACCCTGAAAATTATAGGAACCC	AACACACAACAATCATGGAAGC	5	96171606	96171748	143bp
								5	95853766	95853884	119bp
								5	95536289	95536407	119bp
								5	95390822	95390960	139bp
								5	95206117	95206235	119bp
								5	95051812	95051948	137bp
								5	94873604	94873746	143bp
								5	94505984	94506134	151bp
								Un_random	1210184	1210302	119bp
								Un_random	1828599	1828717	119bp
								Un_random	1731220	1731362	143bp
								Un_random	963717	963835	119bp
86	MGI:704548	D7Mit217a	D7Mit217	D7Mit217b	MGI:94042	CTATTTGATAAAATGATGTTTCTCGC	ATGATGCAAGCATTAACACAGG	7	111498410	111498482	73bp
								7	111460739	111460851	113bp
								7	111498410	111498482	73bp
								7	111460739	111460851	113bp
87	MGI:704609	DXMit196	DXMit196	0	MGI:102460	AGCAACAGGGAAAGTTTGTTT	TTCATACTCTCAAAGACAGTCTCACA	X	146365522	146365698	177bp
								X	146020809	146020983	175bp
								X	145873857	145874031	175bp
								X	145089864	145090038	175bp
								X	144597412	144597586	175bp
88	MGI:704630	D1Mit485	D1Mit485	0	MGI:105631	GTACATTTCCTTTTCTTGAG	GGTATCAGCTCCTATGTAAACAT	1	87556376	87556690	315bp
								1	87432942	87433229	288bp
								1	85313469	85313761	293bp
								1	85038175	85038433	259bp
								1_random	545662	545920	259bp
								1_random	1023253	1023541	289bp
								1_random	925957	926249	293bp
								8_random	172547	172829	283bp
89	MGI:704972	D12Mit140	D12Mit140	0	MGI:89388	AAGGCATTTTCTATGATTCAAAGG	CCCTAAAACCCAGCACTTGA	12	23506182	23506323	142bp
								12	23392676	23392819	144bp
								12	23237301	23237466	166bp
								12	22959896	22960047	152bp
								12	22788136	22788323	188bp
								12	21101016	21101185	170bp
								12	20742926	20743065	140bp
								12	20507140	20507293	154bp
								12	20406985	20407174	190bp
								12	20217401	20217530	130bp
								12	20049827	20049974	148bp
								12	19476143	19476294	152bp
								12	19276205	19276350	146bp
								12	18840191	18840317	127bp
								12	18725392	18725533	142bp
								12	18607023	18607158	136bp
								12	17981368	17981511	144bp
								12	24923457	24923642	186bp
								12	24800652	24800815	164bp
								12	24638733	24638866	134bp
								12	24507019	24507182	164bp
								12	24347148	24347315	168bp
								12	22109648	22109811	164bp
								12	22073108	22073259	152bp
								12	21973831	21973970	140bp
								12	21697217	21697368	152bp
								12	19911565	19911690	126bp
90	MGI:705004	D11Mit225	D11Mit225	0	MGI:101266	TCCAACACTAAATACATAACACATTCA	AATAATGAAAAAGAAGTTTAGAAATGC	11	110505772	110505889	118bp
								11	110505111	110505889	779bp
91	MGI:705076	D3Mit99	D3Mit99	0	MGI:92572	GGAGACTAAAATGCAAGACTGATG	CCTCACATGTAATTAGCACATGC	3	92063356	92063555	200bp
								3	92028543	92028754	212bp
92	MGI:705142	D14Mit231	D14Mit231	0	MGI:102355	ATATAGCAGTGTTTTCATTGGTGTG	TCACAAACACTTGGGCAAAA	14	43644273	43644396	124bp
								14	42246613	42246758	146bp
93	MGI:705145	D14Mit239a	D14Mit239	D14Mit239b	MGI:102363	TATCCACACAGGAGAGGGATG	TGGGCTACATAGGGAGATTTG	14	75296953	75297075	123bp
								14	75294628	75297075	2448bp
								14	75294628	75294754	127bp
								14	75296953	75297075	123bp
								14	75294628	75297075	2448bp
								14	75294628	75294754	127bp
94	MGI:705196	D10Mit70	D10Mit70	0	MGI:88855	ACCTTTCTTCCTACCTACCTACCT	TGGCACTTAGAAACTGATAAATGG	10	103535855	103535995	141bp
								10	103535851	103535995	145bp
95	MGI:705234	DXMit49	DXMit49	0	MGI:95123	TTGGGACGAGTCTGAGCAC	TTGTCACATTTGTCTTGAAGGC	X	34960346	34960495	150bp
								X	34835386	34835563	178bp
96	MGI:705248	D12Mit113	D12Mit113	0	MGI:89358	TGTGCTTCATTTGTAGTGTTATAAAGA	ATGCTGTGGCACATCAATGT	12	56273690	56273800	111bp
								12	56198630	56198740	111bp
97	MGI:705372	D13Mit309	D13Mit309	0	MGI:105832	TTTTTTTCATTCTTTCTGTCTGTCC	AGCCAGCCTGAGAAAGAGTG	13	47939843	47939961	119bp
								13	47939795	47939961	167bp
98	MGI:705414	D1Mit53	D1Mit53	0	MGI:91703	TGGGGACTGAGTGTGCATTA	TTGCTTTAGAGGTTTCTCGAGG	1	87496172	87496316	145bp
								1	85268051	85268211	161bp
								1	85107372	85107514	143bp
								1_random	732836	732990	155bp
								1_random	771543	771667	125bp
								1_random	620952	621084	133bp
								8_random	35397	35551	155bp
99	MGI:705484	DXMit134	DXMit134	0	MGI:100014	GCATTAACAAGGGCTCCAAA	AAATACAAAGTCGCGCGC	X	146360775	146360925	151bp
								X	146016034	146016180	147bp
								X	145869082	145869228	147bp
								X	145500559	145500741	183bp
								X	144717160	144717324	165bp
								X	144419275	144419447	173bp
								X	144325772	144325944	173bp
100	MGI:705520	DXMit36	DXMit36	0	MGI:95109	ATCTTCACGTGATTTTTTAATGTG	ACCCCTCCTCTGGTTTCTGT	X	146047900	146048033	134bp
								X	145900839	145900990	152bp
								X	145718048	145718195	148bp
								X	145339566	145339697	132bp
								X	144934535	144934672	138bp
								X	144767780	144767923	144bp
								X	144634089	144634232	144bp
								X	144242854	144242997	144bp
								X_random	416697	416844	148bp
101	MGI:705532	D8Mit1000	D1Mit184	0	MGI:91561	TGCCTTAATCCTTCTCTAATGACC	TGTATTGCTATATGCTTTCGCG	1_random	755172	755277	106bp
								1_random	1080544	1080647	104bp
								8_random	117347	117440	94bp
								8_random	49975	50072	98bp
102	MGI:705581	D14Mit82	D14Mit82	0	MGI:90090	CATCAATGAGCATCTACCGTG	TTGATTTAAAACAAGCAAACAAGC	14	54105094	54105353	260bp
								14	53718662	53718909	248bp
								14	53409273	53409520	248bp
103	MGI:705583	D14Mit80b	D14Mit80	0	MGI:3620829	AACACAGTTGTGTGCATGCA	TTTTGCAGAATGCTGCATTT	14	44227823	44227960	138bp
								14	43328227	43328368	142bp
104	MGI:705593	D4Mit21	D4Mit21	0	MGI:92841	TTAGATTGACAGTCAAAGCTGTCC	GATCTCTTTCAGTCTTTCAGGACC	4	42721305	42721431	127bp
								4	42081372	42081492	121bp
								4	41891081	41891205	125bp
								4	42487381	42487505	125bp
								4	42297123	42297249	127bp
								Un_random	623295	623419	125bp
105	MGI:705610	D4Mit123	D4Mit123	0	MGI:92746	TCCTTTATTCTCCTAGACACCACA	AACATGTATGCAAGTTCAATCTCC	4	122149802	122149952	151bp
								4	121888170	121888314	145bp
106	MGI:705693	D11Mit1007	D2Mit266	0	MGI:3641412	GGATCTATGCTCCATTTTAATTGC	TCATCTTCTGGTTTCAACATGG	2	181608066	181608192	127bp
								2	181608066	181608192	127bp
								11	121731402	121731560	159bp
								11	121731402	121731560	159bp
107	MGI:705700	DXMit154	DXMit154	0	MGI:99994	GTTAGCATTGTTGTGAGATTGAGG	TTAAAACAGAAAAAAATAAAGTGTGTG	X	146417854	146418020	167bp
								X	146259422	146259606	185bp
								X	146069696	146069804	109bp
								X	145920698	145920820	123bp
								X	145737919	145738039	121bp
								X	145571068	145571188	121bp
								X	145357071	145357179	109bp
								X	144954362	144954482	121bp
								X	144787646	144787766	121bp
								X	144657623	144657747	125bp
								X	144466079	144466209	131bp
								X	144266384	144266494	111bp
								X	144197519	144197649	131bp
								X_random	563721	563841	121bp
								X_random	396854	396974	121bp
108	MGI:705715	D7Mit59	D7Mit59	0	MGI:94082	CAGAAATAGGGACTGGCTGC	TTCACAGCTGAAAGGAACCC	7	67040623	67043301	2679bp
								7	67040623	67040775	153bp
								7	67038112	67040775	2664bp
								7	67038112	67038233	122bp
								7	67035595	67038233	2639bp
								7	67035595	67035724	130bp
								7	67033060	67035724	2665bp
								7	67030502	67030672	171bp
								7	67027991	67030672	2682bp
								7	67027991	67028112	122bp
								7	67025461	67028112	2652bp
								7	67025461	67025602	142bp
								7	67022934	67025602	2669bp
								7	67020383	67020549	167bp
								7	67017865	67020549	2685bp
								7	67017865	67017994	130bp
								7	67015332	67017994	2663bp
								7	67015332	67015477	146bp
								7	67012790	67015477	2688bp
								7	67012790	67012943	154bp
								7	67010242	67012943	2702bp
								7	67010242	67010401	160bp
								7	67007733	67010401	2669bp
								7	67007733	67007853	121bp
								7	67005213	67007853	2641bp
								7	66932475	66932608	134bp
109	MGI:705787	D4Mit24	D4Mit24	0	MGI:92860	TGTATGAACTGATGACATGATTGC	TCTGCTGCCCACACTCAG	4	42170832	42170966	135bp
								4	41856456	41856588	133bp
								4	42846934	42847068	135bp
								4	42521966	42522098	133bp
								Un_random	657912	658044	133bp
110	MGI:705790	D4Mit23	D4Mit23	0	MGI:92859	TTAGATTGACAGTCAAAGCTGTCC	GCTCTGGCATAATAAATCCAGG	4	42721305	42721534	230bp
								4	42202726	42202912	187bp
								4	42081372	42081595	224bp
								4	41891081	41891308	228bp
								4	42815656	42815842	187bp
								4	42487278	42487505	228bp
								4	42297020	42297249	230bp
								Un_random	623192	623419	228bp
111	MGI:705826	D1Mit167	D1Mit167	0	MGI:91542	TCCTTCTGCTCCTGTGCC	GCCTATTTGGTCACCTGCAT	1	7391302	7391413	112bp
								5	3201984	3202099	116bp
								14	20045635	20045752	118bp
112	MGI:705858	D7Mit138	D7Mit138	0	MGI:93956	GCTGAGGCTGAGGCTCTG	TGACACCCCACCACACAC	7	108505893	108506006	114bp
								7	108505893	108505990	98bp
113	MGI:705859	D12Mit217	D12Mit217	0	MGI:101153	AATTGCATGCATGTGTATATGC	GGACATTTTACATCAGTGAATGTT	12	23616255	23616454	200bp
								12	18941923	18942118	196bp
								12	24228287	24228496	210bp
								12	23897036	23897235	200bp
114	MGI:705902	D6Mit72	D6Mit72	0	MGI:93704	AAAAATGCTTTTTGTAACTTCTGG	CATGCATAAACCCTTCATTAAGG	6	69299435	69299587	153bp
								6	69159209	69159411	203bp
								6	69022927	69023073	147bp
115	MGI:706139	D8Mit327	D8Mit327	0	MGI:102196	CGCTTGGACTTGACAAGATG	AAAATTTTCTTTCTCCCAAATGC	17	79789097	79789184	88bp
								8	88004430	88004551	122bp
116	MGI:706148	D12Mit220	D12Mit220.2	0	MGI:101150	CATGGGTTAAGGGTAGAGCCAA	GCCAAAGCACACCCATGTAT	12	23512927	23513075	149bp
								12	23243796	23243944	149bp
								12	22972900	22973048	149bp
								12	20983600	20983748	149bp
								12	20608330	20608478	149bp
								12	18846656	18846804	149bp
117	MGI:706185	D13Mit132	D13Mit132	0	MGI:89670	CTCTCTCACTTGAAAATTGAGTGTG	CCAACTGAAGTATGACCCCA	5	3271290	3271427	138bp
								12	3156049	3156190	142bp
								13	3498176	3498325	150bp
118	MGI:706236	DXMit218	DXMit218	0	MGI:105911	TCATAGTTTAACCCAGTAATTTCACA	TCCTGTTTTCAATTCTTTGGTG	X	149224003	149224088	86bp
								X	149223712	149224088	377bp
119	MGI:706261	D1Mit354	D1Mit354	0	MGI:101412	TGTATAAATACAACCCACTCAGTGTG	AGGGACTTATCTTTCACCTCTGG	1	174785534	174785660	127bp
								1	174785077	174785660	584bp
120	MGI:706274	D5Mit392	D5Mit392.1	0	MGI:105737	GGTGGCACACGCCTTTAATC	GAGACAGGGTTTCTCTGTGTAGTCTT	1	38045331	38048386	3056bp
								1	82563787	82563911	125bp
								1	52817275	52817399	125bp
								17	56388484	56388608	125bp
								17	15585845	15586246	402bp
								18	89052835	89052957	123bp
								19	16028915	16029039	125bp
								19	9017410	9019313	1904bp
								2	12105022	12106050	1029bp
								2	93065180	93065304	125bp
								2	91618460	91618585	126bp
								2	30070864	30070984	121bp
								3	122205036	122208837	3802bp
								4	44203397	44205043	1647bp
								10	39820841	39820965	125bp
								10	121424773	121425391	619bp
								10	59407550	59408648	1099bp
								5	137937378	137940965	3588bp
								5	115780880	115780997	118bp
								5	89730604	89730728	125bp
								5	46021548	46021672	125bp
								6	113551742	113554334	2593bp
								6	119982363	119984438	2076bp
								6	86402360	86404714	2355bp
								7	109022923	109023046	124bp
								8	122227516	122227640	125bp
								8	114574949	114577411	2463bp
								11	103170419	103170521	103bp
								11	100170727	100172121	1395bp
								11	75394719	75395135	417bp
								11	70573610	70573730	121bp
								11	17181833	17181957	125bp
								X	79014865	79014989	125bp
								X	20329729	20333255	3527bp
								X	155891430	155894530	3101bp
								12	4945279	4945403	125bp
								13	70137201	70137325	125bp
								15	58580217	58580341	125bp
								15	42221892	42222016	125bp
								16	82787448	82787572	125bp
								16	20469610	20473552	3943bp
121	MGI:706275	D13Mit66	D13Mit66	0	MGI:89793	CTGCCCTGCTTGTTTGGG	CCAACTTCAGCCATAAGACAG	13	67512305	67512455	151bp
								13	67271283	67271431	149bp
122	MGI:706439	D3Mit128	D3Mit128	0	MGI:92395	AATAAAGGAAGATGTCATCTCAGTACA	GATGGGATGGGATGGGAT	3	150419220	150419369	150bp
								3	150419215	150419369	155bp
								3	150419210	150419369	160bp
123	MGI:706460	D7Mit339	D7Mit339	0	MGI:105489	ACGGAGAAACCCTGCCTC	TATTTTATTCACACAATCTGATTGACA	7	10091184	10091262	79bp
								7	9722931	9723057	127bp
								7	9371617	9371695	79bp
								7	9264873	9264986	114bp
								7	8765524	8765645	122bp
								7	8577841	8577968	128bp
								7	8444308	8444386	79bp
								7	8265711	8265789	79bp
								7	10520417	10520526	110bp
								7	10407140	10407218	79bp
								7	10266684	10266805	122bp
								7	8068481	8068598	118bp
								7	7834477	7834604	128bp
								7	7375444	7375547	104bp
								7	7269992	7270070	79bp
124	MGI:706704	D7Mit224	D7Mit224	0	MGI:100289	CCATGCAGAGGTTTGGAAGT	CCCAATGTTCTTGATTCCCA	7	34087200	34087317	118bp
								7	33783234	33783361	128bp
								7	33556335	33556462	128bp
								7	32823818	32823959	142bp
								7	32427447	32427560	114bp
								7	32359562	32359729	168bp
125	MGI:706773	D12Mit177a	D12Mit177	D12Mit177b	MGI:89428	TTCTAGTCTGAACTCATATCTTCTCCC	GAAGAGTGAATGGAAATCTCCG	12	84613663	84613807	145bp
								12	84613410	84613807	398bp
								12	84344592	84344736	145bp
								12	84344339	84344736	398bp
126	MGI:706891	D17Mit154	D17Mit154	0	MGI:90795	GCAACCTCCACAAATAAATGC	TTTTGATTGATTGATTGATTGTG	17	91984892	91985014	123bp
								19	23891663	23892871	1209bp
127	MGI:706948	D14Mit201	D14Mit201	0	MGI:101042	TGATACCCTCTTCTGGTGTTCA	TGTTGCAGTTAGACTGTAGTCTTTTT	14	27111102	27111239	138bp
								14	26971454	26971595	142bp
								14	26831840	26831981	142bp
128	MGI:706986	D8Mit170a	D8Mit170	D8Mit170b	MGI:94354	GACCCTTGGTTTGAAATTAAACA	TGGTCACACACCATTGAGGT	8	22149830	22149955	126bp
								8	22134417	22134553	137bp
								8	22149830	22149955	126bp
								8	22134417	22134553	137bp
129	MGI:707034	D4Mit341a	D4Mit341	D4Mit341b	MGI:105592	GAGGAAGTGAGACTGTGATTGTG	ATTTGGAGGAAGAAAGCCGT	4	143404059	143404188	130bp
								4	143782475	143782624	150bp
								4	143404059	143404188	130bp
								4	143782475	143782624	150bp
130	MGI:707035	D4Mit340	D4Mit340	0	MGI:105593	TGTTAAAGAATGTGTCTTTCAAGTCC	CAGTGCCCAACCCATACATT	4	143619026	143619121	96bp
								4	143899258	143899373	116bp
131	MGI:707071	D16Mit78a	D16Mit78	D16Mit78b	MGI:90551	CCATGGCATAAAGCCCTCTA	CACATCATATTTATTTTTATGCAGGC	16	77427074	77427219	146bp
								16	77427004	77427219	216bp
								16	77427074	77427219	146bp
								16	77427004	77427219	216bp
132	MGI:707079	D16Mit75a	D16Mit75	D16Mit75b	MGI:90548	GAAAGTTCCAGGCTAGTTGGG	TAGGCCCTTCATTGCAAATC	16	36323306	36323711	406bp
								16	36300654	36300810	157bp
								16	36280225	36280363	139bp
								16	36323306	36323711	406bp
								16	36300654	36300810	157bp
								16	36280225	36280363	139bp
133	MGI:707166	D5Mit347	D5Mit347	0	MGI:102075	CTCTCATTCTGTTTCCTTTTCTCC	CTTACAAAAATCATGCACATGTAGG	5	11847455	11847585	131bp
								5	11772394	11772530	137bp
								5	11683944	11684090	147bp
								5	11596891	11597015	125bp
								5	11418334	11418468	135bp
								5	11343387	11343519	133bp
								5	11257865	11258021	157bp
								5	11129576	11129720	145bp
								5	11042050	11042180	131bp
								5	10867909	10868047	139bp
								5	10068077	10068267	191bp
134	MGI:707344	D14Mit249	D14Mit249	0	MGI:105841	TTGAAAAACACAGTTTTAGATTTATGG	AATTTGGCACCTTGTCTTGG	14	5069666	5069768	103bp
								14	4724711	4724813	103bp
								14	4647674	4647776	103bp
								14	4023078	4023180	103bp
								14	3887841	3887945	105bp
								14	3648447	3648553	107bp
								14	3304240	3304346	107bp
								14	20432344	20432446	103bp
								14	8208666	8208768	103bp
								14	7472416	7472518	103bp
								14	7147920	7148022	103bp
								14	6559045	6559143	99bp
								14	5373777	5373875	99bp
135	MGI:707510	D7Mit23a	D7Mit23	D7Mit23b	MGI:94050	CTGGCTGCACCAGTGATG	ACTCTCAGCCAAATTTGAAAGC	7	26302845	26303061	217bp
								7	26248544	26248776	233bp
								7	26302845	26303061	217bp
								7	26248544	26248776	233bp
136	MGI:707529	D5Mit71	D5Mit71	0	MGI:93372	GGGAACACCCAATGTCATTC	TCACACAGCAAAGTTTTTAGAAAA	5	15040924	15041050	127bp
								5	14986807	14986935	129bp
								5	14947319	14947417	99bp
								5	14923770	14923868	99bp
								5	15116953	15117051	99bp
137	MGI:707547	D4Mit237a	D4Mit237	D4Mit237b	MGI:100522	TTCAAACTCATGAGTCTATGGGG	ATATACACGTAGACTCGCACGC	4	42162170	42162292	123bp
								4	42855608	42855730	123bp
138	MGI:707698	D12Mit220	D12Mit220	0	MGI:101150	TCCAGAAACTCACACACATGC	TCTCAAGCAGCCAAAGGAAT	12	24916837	24916933	97bp
								12	24794023	24794162	140bp
								12	24631482	24631608	127bp
								12	24340283	24340398	116bp
								12	24123569	24123651	83bp
								12	23798742	23798830	89bp
								12	22335746	22335828	83bp
								12	22097559	22097643	85bp
								12	22066495	22066607	113bp
								12	21966551	21966667	117bp
								12	21851684	21851802	119bp
								12	23513084	23513203	120bp
								12	23399946	23400066	121bp
								12	23243953	23244072	120bp
								12	23114774	23114862	89bp
								12	22973057	22973173	117bp
								12	22830627	22830742	116bp
								12	22800382	22800466	85bp
								12	21107657	21107763	107bp
								12	20983757	20983861	105bp
								12	20749505	20749593	89bp
								12	20608487	20608599	113bp
								12	20413608	20413718	111bp
								12	20224662	20224774	113bp
								12	20058325	20058409	85bp
								12	19484699	19484783	85bp
								12	19381284	19381382	99bp
								12	19282871	19282979	109bp
								12	19038890	19038986	97bp
								12	18846813	18846944	132bp
								12	18508738	18508856	119bp
								12	18016681	18016801	121bp
								12	17988036	17988144	109bp
139	MGI:707800	D2Mit356a	D2Mit356	D2Mit356b	MGI:100683	TGCAGTGCCAGATGTGTGT	TCGACTCCTGTCTCTCTCAGG	2	3695955	3696067	113bp
								2	3695955	3696000	46bp
								2	3695955	3696067	113bp
								2	3695955	3696000	46bp
140	MGI:707806	DXMit113a	DXMit113	DXMit113b	MGI:95074	AAGTCATGGGTGTTCTATAGGAGC	GAGTCCCTACACACCCAGACA	X	91946243	91946336	94bp
								X	92078720	92078815	96bp
								X	91946243	91946336	94bp
								X	92078720	92078815	96bp
141	MGI:706037	D9Mit34	D9Mit34.1	0	MGI:94727	TGAGATGGCTCAGTGGGTAAG	ACACTGTAGCTGTCTTCAGACACTC	1	195359335	195359476	142bp
								1	193203371	193203512	142bp
								1	190821411	190821552	142bp
								1	190814267	190814408	142bp
								1	184121613	184121754	142bp
								1	184052913	184053033	121bp
								1	184005134	184005275	142bp
								1	183930211	183930352	142bp
								1	183785274	183785415	142bp
								1	183121427	183121568	142bp
								1	183119967	183121568	1602bp
								1	183034762	183034903	142bp
								1	182681690	182681831	142bp
								1	181306759	181306901	143bp
								1	181149310	181149451	142bp
								1	180301356	180301497	142bp
								1	180065170	180065311	142bp
								1	179617938	179618079	142bp
								1	178345164	178345305	142bp
								1	177342241	177342382	142bp
								1	177101715	177101858	144bp
								1	173723353	173723494	142bp
								1	173598539	173598680	142bp
								1	173553051	173553192	142bp
								1	173138025	173138165	141bp
								1	169811633	169811774	142bp
								1	169452115	169452256	142bp
								1	169354357	169354498	142bp
								1	169268625	169268766	142bp
								1	167951020	167951161	142bp
								1	166834881	166835019	139bp
								1	165949417	165949558	142bp
								1	163262855	163262996	142bp
								1	162131374	162131516	143bp
								1	159356769	159356909	141bp
								1	159023514	159023654	141bp
								1	158408913	158409054	142bp
								1	158325899	158326040	142bp
								1	158324741	158326040	1300bp
								1	158324741	158324882	142bp
								1	158212470	158213324	855bp
								1	157649364	157649505	142bp
								1	154867717	154867858	142bp
								1	153094089	153094230	142bp
								1	152783556	152783697	142bp
								1	145376581	145376722	142bp
								1	143537976	143538117	142bp
								1	142624716	142624857	142bp
								1	140876364	140876505	142bp
								1	140842895	140843036	142bp
								1	138598810	138598951	142bp
								1	138531456	138531597	142bp
								1	138455091	138455232	142bp
								1	138453896	138455232	1337bp
								1	138344867	138345008	142bp
								1	138099140	138099281	142bp
								1	137293447	137293588	142bp
								1	137167591	137167732	142bp
								1	137132885	137133027	143bp
								1	136436285	136439962	3678bp
								1	136436285	136436426	142bp
								1	135618688	135618829	142bp
								1	135569299	135569440	142bp
								1	135235742	135235885	144bp
								1	135230309	135230450	142bp
								1	134918956	134919097	142bp
								1	134904439	134906550	2112bp
								1	134069705	134069846	142bp
								1	133810423	133810564	142bp
								1	133794370	133794511	142bp
								1	119466060	119466200	141bp
								1	118104067	118104208	142bp
								1	116596217	116596358	142bp
								1	111082310	111082451	142bp
								1	108260292	108260433	142bp
								1	108078275	108078416	142bp
								1	107615625	107615766	142bp
								1	106101514	106101655	142bp
								1	103630026	103630167	142bp
								1	103475756	103475897	142bp
								1	99644316	99644457	142bp
								1	99529386	99529527	142bp
								1	96074229	96074369	141bp
								1	95760834	95760975	142bp
								1	93450353	93450494	142bp
								1	91650735	91650877	143bp
								1	90593551	90593692	142bp
								1	90493196	90493337	142bp
								1	89721431	89721572	142bp
								1	89705910	89706051	142bp
								1	88449116	88449239	124bp
								1	88364433	88364574	142bp
								1	88352378	88352540	163bp
								1	88229313	88229454	142bp
								1	88212744	88212878	135bp
								1	84916285	84916426	142bp
								1	82343541	82343682	142bp
								1	80397204	80397345	142bp
								1	78348744	78348885	142bp
								1	78174460	78174601	142bp
								1	75320213	75320354	142bp
								1	74756878	74757041	164bp
								1	74659834	74659975	142bp
								1	74642780	74642921	142bp
								1	74639777	74642921	3145bp
								1	74603893	74604034	142bp
								1	74582297	74582438	142bp
								1	74579201	74582438	3238bp
								1	74579201	74580995	1795bp
								1	74579201	74579339	139bp
								1	74424088	74424229	142bp
								1	74206464	74206605	142bp
								1	72285906	72286047	142bp
								1	71955342	71955483	142bp
								1	71752207	71752348	142bp
								1	69011520	69011661	142bp
								1	65628920	65629061	142bp
								1	64807280	64807421	142bp
								1	63393001	63393142	142bp
								1	63230968	63231109	142bp
								1	63061238	63061382	145bp
								1	60681730	60681871	142bp
								1	60217816	60217957	142bp
								1	60191126	60191255	130bp
								1	59718395	59718536	142bp
								1	59715753	59718536	2784bp
								1	59715753	59715894	142bp
								1	59687438	59687579	142bp
								1	58814001	58814142	142bp
								1	58750964	58751105	142bp
								1	58528107	58528248	142bp
								1	57404236	57404377	142bp
								1	55161943	55162084	142bp
								1	54098612	54098753	142bp
								1	54044980	54045113	134bp
								1	52967047	52967188	142bp
								1	52073597	52073738	142bp
								1	48050036	48050177	142bp
								1	43178270	43178411	142bp
								1	43071210	43071351	142bp
								1	42846107	42846248	142bp
								1	36910016	36910157	142bp
								1	36876494	36876635	142bp
								1	36848127	36848268	142bp
								1	36681225	36681366	142bp
								1	34525835	34526430	596bp
								1	34525835	34525978	144bp
								1	34370937	34371078	142bp
								1	33929390	33929531	142bp
								1	33779627	33779768	142bp
								1	33718252	33718393	142bp
								1	28432850	28432991	142bp
								1	26032755	26032896	142bp
								1	21325072	21325213	142bp
								1	19166707	19166848	142bp
								1	16707058	16707199	142bp
								1	15697800	15697941	142bp
								1	13044343	13044484	142bp
								1	12625290	12625431	142bp
								1	10597529	10597670	142bp
								1	9376689	9376830	142bp
								1	9241086	9241227	142bp
								1	8944413	8944555	143bp
								1	8827651	8827793	143bp
								1	4904218	4904360	143bp
								1	4748186	4748327	142bp
								1	195696764	195696905	142bp
								1	194239224	194239364	141bp
								1	193378198	193378339	142bp
								1	193175218	193175359	142bp
								1	187305270	187305411	142bp
								1	187269317	187269458	142bp
								1	187223687	187223828	142bp
								1	187207101	187207242	142bp
								1	185905298	185905439	142bp
								1	184662141	184662282	142bp
								1	184265676	184265817	142bp
								1	184123115	184123256	142bp
								1	183049158	183049299	142bp
								1	182855737	182855878	142bp
								1	182581237	182581378	142bp
								1	182567932	182568073	142bp
								1	182324727	182324868	142bp
								1	181785106	181785247	142bp
								1	181632926	181633067	142bp
								1	181612884	181613025	142bp
								1	181578825	181578966	142bp
								1	180114629	180114770	142bp
								1	174088028	174088169	142bp
								1	173968150	173968291	142bp
								1	173363217	173363358	142bp
								1	173240826	173240967	142bp
								1	172801237	172801378	142bp
								1	172036294	172036435	142bp
								1	170372446	170372587	142bp
								1	170368271	170368410	140bp
								1	168890858	168890999	142bp
								1	166254760	166254901	142bp
								1	165955063	165955204	142bp
								1	163191984	163192125	142bp
								1	162978472	162978613	142bp
								1	162892713	162892854	142bp
								1	159382195	159382336	142bp
								1	159381982	159382336	355bp
								1	158994441	158994582	142bp
								1	158994412	158994582	171bp
								1	158785442	158785583	142bp
								1	158637478	158637619	142bp
								1	158613022	158613160	139bp
								1	158581455	158581596	142bp
								1	158526480	158527803	1324bp
								1	158452950	158453091	142bp
								1	158446723	158446864	142bp
								1	157523494	157523636	143bp
								1	155356695	155356836	142bp
								1	155346631	155348188	1558bp
								1	154955552	154955693	142bp
								1	154877891	154878032	142bp
								1	154088619	154088760	142bp
								1	153927997	153928139	143bp
								1	153333026	153333167	142bp
								1	153242965	153243103	139bp
								1	150617745	150617886	142bp
								1	145538048	145538172	125bp
								1	140875179	140875316	138bp
								1	138915434	138915575	142bp
								1	138688584	138688725	142bp
								1	138652367	138652508	142bp
								1	138644507	138644648	142bp
								1	138478345	138478486	142bp
								1	137416753	137416894	142bp
								1	137345938	137346080	143bp
								1	137064958	137065099	142bp
								1	136608993	136609134	142bp
								1	136325829	136325970	142bp
								1	135627939	135628080	142bp
								1	135450110	135450251	142bp
								1	135107892	135108046	155bp
								1	135038943	135039084	142bp
								1	134940402	134940543	142bp
								1	134731876	134732017	142bp
								1	134658267	134658408	142bp
								1	134138767	134138908	142bp
								1	134124080	134124211	132bp
								1	133906927	133907068	142bp
								1	133767961	133768102	142bp
								1	133012856	133012997	142bp
								1	130261794	130261935	142bp
								1	129803439	129803580	142bp
								1	121568815	121568956	142bp
								1	120569273	120569414	142bp
								1	120238256	120238397	142bp
								1	119385093	119385235	143bp
								1	116304579	116304720	142bp
								1	116119945	116120086	142bp
								1	104531998	104532139	142bp
								1	99578445	99578586	142bp
								1	98518022	98518163	142bp
								1	97367549	97367690	142bp
								1	95889829	95889970	142bp
								1	95858369	95858510	142bp
								1	95786543	95786684	142bp
								1	95782726	95786684	3959bp
								1	95782726	95782867	142bp
								1	95162637	95162778	142bp
								1	90572033	90572173	141bp
								1	89591278	89591419	142bp
								1	89142407	89142550	144bp
								1	88922125	88922266	142bp
								1	88435748	88435889	142bp
								1	88383097	88383238	142bp
								1	87782213	87782355	143bp
								1	85002517	85002658	142bp
								1	85000791	85002658	1868bp
								1	83177612	83177753	142bp
								1	79752364	79752504	141bp
								1	75581506	75581647	142bp
								1	74927055	74927196	142bp
								1	74865752	74865884	133bp
								1	74276925	74277066	142bp
								1	74220462	74220932	471bp
								1	64797030	64797171	142bp
								1	63820731	63820872	142bp
								1	63658423	63658557	135bp
								1	60531486	60531627	142bp
								1	60516052	60516193	142bp
								1	60488694	60488835	142bp
								1	60296513	60296654	142bp
								1	60131513	60131654	142bp
								1	59898991	59899132	142bp
								1	59841085	59841226	142bp
								1	59825449	59825590	142bp
								1	59816073	59816734	662bp
								1	59772130	59772271	142bp
								1	59752205	59752346	142bp
								1	59736924	59737065	142bp
								1	59644189	59644330	142bp
								1	58557952	58558093	142bp
								1	58553600	58553955	356bp
								1	58512800	58512941	142bp
								1	58493314	58493455	142bp
								1	58491623	58493455	1833bp
								1	58491623	58491764	142bp
								1	55407179	55407254	76bp
								1	55126166	55126307	142bp
								1	54944074	54944215	142bp
								1	54516577	54516718	142bp
								1	52638935	52639076	142bp
								1	51767350	51767504	155bp
								1	50593453	50593594	142bp
								1	47225192	47225333	142bp
								1	45453935	45454076	142bp
								1	44586204	44586345	142bp
								1	43948611	43948752	142bp
								1	43508832	43508973	142bp
								1	41851598	41851739	142bp
								1	39826198	39826339	142bp
								1	38536847	38536988	142bp
								1	37541396	37541538	143bp
								1	37268356	37268494	139bp
								1	34416321	34416462	142bp
								1	34147345	34147486	142bp
								1	34086621	34086762	142bp
								1	33942204	33942345	142bp
								1	31318100	31318244	145bp
								1	31051376	31051517	142bp
								1	27263923	27264064	142bp
								1	22119694	22119835	142bp
								1	18881704	18881827	124bp
								1	17224722	17224863	142bp
								1	12991709	12991850	142bp
								1	9835780	9835921	142bp
								1	9752455	9752596	142bp
								1	4940947	4941088	142bp
								1	4769555	4769696	142bp
								17	95153156	95153297	142bp
								17	93622589	93622730	142bp
								17	92711426	92711567	142bp
								17	89272943	89273088	146bp
								17	88700851	88700992	142bp
								17	88359066	88359207	142bp
								17	88131054	88131195	142bp
								17	86035354	86035495	142bp
								17	85228401	85228542	142bp
								17	84550323	84550464	142bp
								17	83998755	83998896	142bp
								17	83902187	83902328	142bp
								17	83880523	83880668	146bp
								17	83721178	83721319	142bp
								17	82541434	82541575	142bp
								17	82156302	82156442	141bp
								17	80608858	80609000	143bp
								17	80281688	80281829	142bp
								17	78791155	78791296	142bp
								17	78569791	78569932	142bp
								17	78151773	78151914	142bp
								17	78150212	78151914	1703bp
								17	78150212	78150353	142bp
								17	75644921	75645062	142bp
								17	75260482	75260623	142bp
								17	75151137	75151282	146bp
								17	75114153	75114294	142bp
								17	74806927	74807068	142bp
								17	74744384	74744525	142bp
								17	74632167	74632308	142bp
								17	74607849	74607990	142bp
								17	74589645	74589786	142bp
								17	74490169	74490310	142bp
								17	71277992	71278133	142bp
								17	71142528	71142669	142bp
								17	71135772	71135913	142bp
								17	71106721	71106862	142bp
								17	71077575	71077716	142bp
								17	71046451	71046592	142bp
								17	71045548	71046592	1045bp
								17	71045548	71045689	142bp
								17	63930957	63931098	142bp
								17	58049212	58049354	143bp
								17	57112617	57112758	142bp
								17	56990993	56991134	142bp
								17	56699157	56699298	142bp
								17	56362919	56365958	3040bp
								17	56229676	56233512	3837bp
								17	55741701	55741842	142bp
								17	53545533	53545674	142bp
								17	49189598	49189739	142bp
								17	48905423	48905564	142bp
								17	48609923	48610064	142bp
								17	48048934	48049075	142bp
								17	47290794	47290935	142bp
								17	46922138	46922279	142bp
								17	46829776	46829930	155bp
								17	46741087	46741228	142bp
								17	41177220	41177361	142bp
								17	40858828	40858969	142bp
								17	39985855	39985996	142bp
								17	38117210	38117351	142bp
								17	38088327	38088468	142bp
								17	36008746	36008887	142bp
								17	35306353	35306494	142bp
								17	35287917	35288058	142bp
								17	35126914	35129932	3019bp
								17	34761464	34761605	142bp
								17	34697210	34697351	142bp
								17	34300736	34300877	142bp
								17	34131466	34131607	142bp
								17	33992644	33992785	142bp
								17	33909973	33910114	142bp
								17	33175180	33175321	142bp
								17	32869356	32870257	902bp
								17	32869356	32869491	136bp
								17	32423064	32426648	3585bp
								17	32399425	32399566	142bp
								17	32398339	32399566	1228bp
								17	32398339	32398480	142bp
								17	32384807	32384938	132bp
								17	32328602	32328743	142bp
								17	32269856	32269997	142bp
								17	30784120	30784261	142bp
								17	30765536	30765677	142bp
								17	30762981	30765677	2697bp
								17	29711024	29711166	143bp
								17	29625041	29625182	142bp
								17	29495184	29495325	142bp
								17	29140259	29140400	142bp
								17	29130536	29130885	350bp
								17	29114918	29115059	142bp
								17	29012933	29013074	142bp
								17	28744505	28744646	142bp
								17	28610080	28610221	142bp
								17	28585971	28586113	143bp
								17	27669515	27669656	142bp
								17	25833043	25833185	143bp
								17	24606060	24606651	592bp
								17	24606060	24606201	142bp
								17	24191381	24191522	142bp
								17	24188897	24191522	2626bp
								17	23861203	23861344	142bp
								17	23751868	23752009	142bp
								17	23719341	23719482	142bp
								17	23511018	23511159	142bp
								17	22484909	22485050	142bp
								17	21997098	21997239	142bp
								17	21873421	21873562	142bp
								17	21825202	21825343	142bp
								17	21576198	21576339	142bp
								17	20236637	20236778	142bp
								17	19426908	19427044	137bp
								17	15828362	15828503	142bp
								17	13833505	13834203	699bp
								17	13833505	13833638	134bp
								17	13212820	13212961	142bp
								17	12178924	12179065	142bp
								17	8519349	8521212	1864bp
								17	7782844	7782985	142bp
								17	7397936	7398077	142bp
								17	7395369	7398077	2709bp
								17	6628246	6628387	142bp
								17	6550669	6550810	142bp
								17	6414607	6414748	142bp
								17	6412163	6414748	2586bp
								17	6412163	6412304	142bp
								17	6384641	6384782	142bp
								17	6290968	6291109	142bp
								17	6255636	6255777	142bp
								17	3106689	3106830	142bp
								17	95212886	95213027	142bp
								17	93867441	93867582	142bp
								17	91623746	91623873	128bp
								17	91586790	91586931	142bp
								17	88647024	88647153	130bp
								17	88646497	88647153	657bp
								17	88552190	88552331	142bp
								17	88469133	88469274	142bp
								17	87867677	87867811	135bp
								17	84180153	84180294	142bp
								17	83581975	83582125	151bp
								17	82668636	82668777	142bp
								17	81648326	81648467	142bp
								17	81036226	81036367	142bp
								17	80415749	80415890	142bp
								17	80285089	80285230	142bp
								17	79176087	79176228	142bp
								17	78064121	78064262	142bp
								17	75932581	75932722	142bp
								17	75563410	75563551	142bp
								17	75130577	75130718	142bp
								17	75055217	75055358	142bp
								17	74939736	74939877	142bp
								17	74931759	74931900	142bp
								17	74921720	74921861	142bp
								17	74686434	74686576	143bp
								17	74581622	74581763	142bp
								17	73608623	73608763	141bp
								17	73596789	73596930	142bp
								17	71730103	71730244	142bp
								17	71334564	71334704	141bp
								17	71291381	71291522	142bp
								17	66957643	66957784	142bp
								17	66553992	66554133	142bp
								17	66483759	66483900	142bp
								17	63446927	63447068	142bp
								17	63287964	63288105	142bp
								17	59254064	59254205	142bp
								17	56809924	56810065	142bp
								17	56786249	56786390	142bp
								17	56468426	56468567	142bp
								17	56441025	56441167	143bp
								17	56403261	56404123	863bp
								17	56231264	56234946	3683bp
								17	56231264	56231405	142bp
								17	55888224	55888365	142bp
								17	52796665	52796806	142bp
								17	51218170	51218311	142bp
								17	48196992	48197133	142bp
								17	47636873	47637014	142bp
								17	46954140	46954281	142bp
								17	46875163	46875304	142bp
								17	46804240	46804382	143bp
								17	46673333	46673474	142bp
								17	44891487	44891628	142bp
								17	43700253	43700394	142bp
								17	41611364	41611512	149bp
								17	38798627	38798768	142bp
								17	36376549	36376690	142bp
								17	36166973	36167113	141bp
								17	36108996	36109137	142bp
								17	35988343	35988484	142bp
								17	35955881	35956022	142bp
								17	35931327	35931468	142bp
								17	35854775	35854997	223bp
								17	35679063	35679204	142bp
								17	35329148	35329290	143bp
								17	35223182	35223323	142bp
								17	35143162	35143642	481bp
								17	33946899	33947040	142bp
								17	33410162	33410303	142bp
								17	31832289	31832430	142bp
								17	31792218	31792360	143bp
								17	31612216	31612357	142bp
								17	30592153	30592294	142bp
								17	30115480	30115621	142bp
								17	29894748	29894889	142bp
								17	29698060	29698198	139bp
								17	28870790	28870931	142bp
								17	28704091	28704232	142bp
								17	28527199	28527971	773bp
								17	28527199	28527332	134bp
								17	28514924	28515065	142bp
								17	28503687	28503828	142bp
								17	28351662	28351803	142bp
								17	28232659	28232800	142bp
								17	28086886	28087027	142bp
								17	27715022	27715162	141bp
								17	27204818	27205367	550bp
								17	27192671	27192812	142bp
								17	27181693	27181834	142bp
								17	27051560	27051701	142bp
								17	26947157	26947298	142bp
								17	26883516	26884206	691bp
								17	26722644	26722785	142bp
								17	26604225	26604657	433bp
								17	26251367	26251508	142bp
								17	26211263	26211404	142bp
								17	25158635	25158777	143bp
								17	25158065	25158777	713bp
								17	25104831	25104972	142bp
								17	24840370	24840511	142bp
								17	24601169	24601309	141bp
								17	24596404	24596545	142bp
								17	24534794	24534935	142bp
								17	24323895	24324036	142bp
								17	24170549	24170690	142bp
								17	24106557	24106695	139bp
								17	23988248	23988389	142bp
								17	23937028	23937169	142bp
								17	23904660	23904798	139bp
								17	23801189	23801330	142bp
								17	22503087	22503228	142bp
								17	22262099	22262239	141bp
								17	21691223	21691364	142bp
								17	17632122	17632263	142bp
								17	17561588	17561729	142bp
								17	17505310	17505449	140bp
								17	15802896	15803038	143bp
								17	15653208	15653349	142bp
								17	15077174	15077315	142bp
								17	13175308	13175447	140bp
								17	12977163	12977317	155bp
								17	12955460	12955601	142bp
								17	12955182	12955601	420bp
								17	11956595	11956736	142bp
								17	10692530	10692671	142bp
								17	8682615	8682756	142bp
								17	6833064	6833205	142bp
								17	6528009	6528150	142bp
								17	6490668	6490809	142bp
								17	6455724	6455865	142bp
								17	6322761	6322902	142bp
								17	5276517	5276658	142bp
								17	4287907	4288048	142bp
								17	3089398	3089539	142bp
								18	78079892	78080033	142bp
								18	77977517	77977658	142bp
								18	77956655	77956770	116bp
								18	77274087	77274228	142bp
								18	76346760	76346901	142bp
								18	75123225	75123366	142bp
								18	74677325	74677466	142bp
								18	74326130	74326283	154bp
								18	68059393	68059534	142bp
								18	67817584	67817913	330bp
								18	67817584	67817725	142bp
								18	67784833	67784974	142bp
								18	67715894	67716035	142bp
								18	67669848	67669984	137bp
								18	67310761	67310902	142bp
								18	62084187	62084328	142bp
								18	61830659	61830800	142bp
								18	61761374	61761515	142bp
								18	60961790	60961931	142bp
								18	60897394	60897975	582bp
								18	58848368	58848509	142bp
								18	58143937	58144078	142bp
								18	56834107	56834248	142bp
								18	56814558	56814699	142bp
								18	56605944	56606085	142bp
								18	55915356	55915497	142bp
								18	54968412	54968553	142bp
								18	51114431	51114572	142bp
								18	50280488	50280589	102bp
								18	50169379	50169521	143bp
								18	47605561	47605702	142bp
								18	46722999	46723140	142bp
								18	43111546	43111687	142bp
								18	42383089	42383230	142bp
								18	40651748	40651889	142bp
								18	38697430	38697571	142bp
								18	38111761	38111902	142bp
								18	37871745	37871886	142bp
								18	36059600	36059741	142bp
								18	36012283	36012630	348bp
								18	36012283	36012424	142bp
								18	35916933	35917849	917bp
								18	35819283	35819424	142bp
								18	35804245	35804386	142bp
								18	35625937	35626078	142bp
								18	35133347	35133488	142bp
								18	35123111	35123252	142bp
								18	34899206	34899347	142bp
								18	34515563	34515704	142bp
								18	34221657	34221798	142bp
								18	31861570	31861711	142bp
								18	31536499	31536640	142bp
								18	24973524	24973664	141bp
								18	24074361	24074502	142bp
								18	22309055	22309196	142bp
								18	22194841	22194979	139bp
								18	21355458	21355599	142bp
								18	20876356	20876497	142bp
								18	17196022	17196163	142bp
								18	14834538	14834679	142bp
								18	12296780	12296921	142bp
								18	11936101	11937906	1806bp
								18	11732662	11732803	142bp
								18	10598466	10600072	1607bp
								18	9952538	9952679	142bp
								18	6286645	6286786	142bp
								18	6184466	6184607	142bp
								18	6084224	6087960	3737bp
								18	5990996	5991137	142bp
								18	5769611	5769752	142bp
								18	3840263	3840404	142bp
								18	89000971	89001112	142bp
								18	85068091	85068232	142bp
								18	85012638	85012779	142bp
								18	83044780	83044921	142bp
								18	80461371	80461512	142bp
								18	79376916	79377057	142bp
								18	78527867	78528008	142bp
								18	78340792	78340933	142bp
								18	78113941	78114082	142bp
								18	78113567	78114082	516bp
								18	78029575	78029716	142bp
								18	77962367	77962508	142bp
								18	77961805	77962508	704bp
								18	77949104	77949245	142bp
								18	77929565	77929706	142bp
								18	77876840	77876981	142bp
								18	77318935	77319076	142bp
								18	76180941	76181083	143bp
								18	74543409	74543550	142bp
								18	74394828	74394969	142bp
								18	68368596	68368737	142bp
								18	68048786	68048927	142bp
								18	67996992	68000378	3387bp
								18	67857848	67857989	142bp
								18	67813026	67813167	142bp
								18	67629945	67630077	133bp
								18	67540721	67540862	142bp
								18	65797309	65797450	142bp
								18	65549413	65549554	142bp
								18	64802444	64802582	139bp
								18	64518135	64520459	2325bp
								18	62415469	62415611	143bp
								18	59243689	59243830	142bp
								18	56870185	56870326	142bp
								18	53954262	53954403	142bp
								18	53337988	53338129	142bp
								18	50363000	50363141	142bp
								18	50045095	50045236	142bp
								18	49981147	49981288	142bp
								18	47755110	47755251	142bp
								18	47642259	47642400	142bp
								18	47156259	47156400	142bp
								18	47121482	47121623	142bp
								18	42676735	42680311	3577bp
								18	42600163	42600304	142bp
								18	42505416	42505558	143bp
								18	38903823	38903964	142bp
								18	38866126	38866261	136bp
								18	38736675	38736816	142bp
								18	38706383	38706524	142bp
								18	38582790	38582931	142bp
								18	38019418	38019561	144bp
								18	37205770	37205911	142bp
								18	36995669	36995810	142bp
								18	36974220	36974361	142bp
								18	36899793	36899934	142bp
								18	36877058	36877199	142bp
								18	36873492	36877199	3708bp
								18	36873492	36873623	132bp
								18	36764265	36764406	142bp
								18	36760828	36764406	3579bp
								18	36755498	36755639	142bp
								18	36754067	36755639	1573bp
								18	36409332	36409473	142bp
								18	36109369	36109510	142bp
								18	35938144	35938285	142bp
								18	35793263	35793404	142bp
								18	35589262	35589403	142bp
								18	35066844	35069177	2334bp
								18	35040917	35041058	142bp
								18	34795533	34795674	142bp
								18	34735385	34735526	142bp
								18	34694400	34694541	142bp
								18	34630689	34630830	142bp
								18	34304189	34304330	142bp
								18	34185774	34185915	142bp
								18	34142760	34142901	142bp
								18	32486932	32487070	139bp
								18	32335257	32335398	142bp
								18	31914199	31914340	142bp
								18	31900598	31900740	143bp
								18	31898202	31900740	2539bp
								18	30455000	30455141	142bp
								18	24704480	24704621	142bp
								18	22828410	22828551	142bp
								18	21169645	21169786	142bp
								18	21079792	21082355	2564bp
								18	21079792	21079933	142bp
								18	21018083	21018224	142bp
								18	20979668	20979809	142bp
								18	16148021	16148169	149bp
								18	15746431	15746572	142bp
								18	12903825	12903966	142bp
								18	12088358	12088499	142bp
								18	10801404	10801545	142bp
								18	10719402	10719543	142bp
								18	10286424	10286565	142bp
								18	8672989	8673130	142bp
								18	7468668	7468809	142bp
								18	6741633	6741774	142bp
								18	6582566	6582707	142bp
								18	6380942	6381083	142bp
								18	6349504	6349645	142bp
								18	6068341	6068482	142bp
								18	4475798	4475939	142bp
								18	4472566	4475939	3374bp
								18	4151893	4152034	142bp
								18	3236096	3236237	142bp
								19	59181353	59181494	142bp
								19	57537914	57538043	130bp
								19	56290137	56290278	142bp
								19	55308962	55309103	142bp
								19	53798425	53798566	142bp
								19	52114077	52114218	142bp
								19	50854215	50854356	142bp
								19	47245743	47245884	142bp
								19	47065000	47065141	142bp
								19	46619953	46620617	665bp
								19	46619953	46620094	142bp
								19	46597400	46597537	138bp
								19	46536598	46536739	142bp
								19	46368638	46368779	142bp
								19	46004847	46004988	142bp
								19	45989373	45989518	146bp
								19	45941103	45941244	142bp
								19	45833580	45833721	142bp
								19	45737960	45738101	142bp
								19	45683774	45683915	142bp
								19	45470844	45470985	142bp
[truncated: 5,902 more rows]
