# Supplementary material for: A New Standard Genetic Map for the Laboratory Mouse
Source: Oxford University Press journal article supplement (doi:10.1534/genetics.109.105486), 2009-06-18
Supplement: tables3.xls [file tables3.xls]

## Sheet: Sheet1
TABLE S3
MIT markers that could not be mapped to mouse genome build 37
Marker name 1	Marker name 2	Marker name 3	MGI Marker Accession ID	MGI Primer Pair ID	Primer 1 sequence	Primer 2 sequence	37 chr	37 bp start	37 bp end	how mapped	status	MGI_Chr	MGI_cM	MGI_Symbol
D10Mit10	D10Mit10-pA	D10Mit10-pB	MGI:88715	MGI:1344766	CCAGTCTCAAAACAACAACAAAC	TTGCACCTAGATTGCCTGA				isPCR	unmapped	10	51	D10Mit10
D10Mit10	D10Mit10-pA	D10Mit10-pB	MGI:88715	MGI:701596	CCAGTCTCAAAACAACAACAAAC	TTGCACCTAGATTGCCTGA				isPcr	unmapped	10	51	D10Mit10
D10Mit1001	D1Mit59.1		MGI:91709	MGI:702673	CTAAAGGGACAAAAGCTGGG	GTTCGTTCCATCTACCATAGCATCTA				isPcr	unmapped	10	syntenic	D10Mit1001
D10Mit128	D10Mit128		MGI:88746	MGI:704206	GAATTCACACCCACATGAACA	GAAATTTTCAGTCCTCACAAAGTG				isPCR	unmapped	10	30	D10Mit128
D10Mit13	D10Mit13		MGI:88748	MGI:701599	GATGGAGCTTCTATGTCAACCC	TTATTTCCACTGAACTTCCTTTCC				isPCR	unmapped	10	62	D10Mit13
D10Mit146.1	D10Mit146.1		MGI:3613805	MGI:701683	GCAAACATAAATGCTGTGGGT	TATGCACACACATACCTACACAACA				isPCR	unmapped	10	syntenic	D10Mit146.1
D10Mit151	D10Mit151		MGI:88771	MGI:704648	GTCCTTGGCAGATTATTTTTGC	TGCTTGTTTAGCATATGCAAGG				isPCR	unmapped	10	69	D10Mit151
D10Mit153	D10Mit153		MGI:88773	MGI:703704	AATGCTGACCCCAGTTTTTG	ATGCTGTGGGCCAAACAC				isPCR	unmapped	10	4	D10Mit153
D10Mit171	D10Mit171		MGI:88793	MGI:705640	CAGTTCGCTCACAGCAAAAG	TGTAGGCCAGAACCGACTTT				isPcr	unmapped	10	30.5	D10Mit171
D10Mit190	D10Mit190		MGI:101330	MGI:705105	CTCACACGTGAGAAAGAAGCC	TGATGTGGTACCATGGATGG				isPCR	unmapped	10	6	D10Mit190
D10Mit222	D10Mit222		MGI:101298	MGI:701786	TATCATTGTGGAGTTAGGACTACAGC	ACTTATTATCAATACAACTCCCGACA				isPCR	unmapped	10	34	D10Mit222
D10Mit241	D10Mit241		MGI:101279	MGI:706735	TTCAAAAGTCGTCCTCTGACC	GATGTCTATTTCATGTGTGTATGTTCA				isPCR	unmapped	10	40.7	D10Mit241
D10Mit242	D10Mit242		MGI:101278	MGI:700393	TCAGCACTAGGAAGTTACTATGTATGC	TACATGGGTATATGTACACAGTGTCTT				isPCR	unmapped	10	41.2	D10Mit242
D10Mit248	D10Mit248		MGI:102244	MGI:700390	GAATGTACATTTTTTCCTTTTCTCTT	ACTATAACTCAACCAATATTGTGTGTG				isPCR	unmapped	10	7	D10Mit248
D10Mit257.1	D10Mit257.1		MGI:3613813	MGI:704446	GACACAAACTTCCCTTTAGAGGAT	AGCCTTGATCCTAGCCAAAAA				isPcr	unmapped	10	syntenic	D10Mit257.1
D10Mit264	D10Mit264		MGI:102260	MGI:704377	TGGTATGGATCAATGTGAAATTC	CTTTACTCATCTATACCAAGGGGC				isPCR	unmapped	10	50	D10Mit264
D10Mit280.1	D10Mit280.1		MGI:3613814	MGI:700395	AATGTGAGTCCAGGACAGCC	TATGAGTGTACCAATAGGGACCTT				isPcr	unmapped	10	syntenic	D10Mit280.1
D10Mit286	D10Mit286		MGI:105792	MGI:701604	ACATGTATGGTGTAGTACGCAGG	TTGTCTCCTTTTGCCCTCAC				isPCR	unmapped	10	30	D10Mit286
D10Mit287b	D10Mit287	D10Mit287a	MGI:3652849	MGI:704191	CACACAGTTGAGGACAATTTTACA	ATTGGCAACTAGCGTATATCCA				isPCR	unmapped	10	syntenic	D10Mit287b
D10Mit293	D10Mit293		MGI:105799	MGI:703435	AAAAAGGGTACCAAGAATTGAAA	ATAGTTTGAAATGTTAATCCCTATTGG				isPCR	unmapped	10	59	D10Mit293
D10Mit3	D10Mit3		MGI:88813	MGI:701261	GTTGATAGTCCCACCTCACTCA	TGAGAAATTCCATCTGTGGC				isPCR	unmapped	10	21	D10Mit3
D10Mit303	D10Mit303.1		MGI:106933	MGI:700944	GCTGAGAATTTAAACACAGGTCG	GATATTTTCATACGCACAGGCA				isPCR	unmapped	10	62	D10Mit303
D10Mit40	D10Mit40		MGI:88823	MGI:703816	GGCTTTGGGGATAGCATTG	AGGTCAACATGCTGTCAAACA				isPCR	unmapped	10	29	D10Mit40
D10Mit45	D10Mit45		MGI:88828	MGI:1347922	AAAGGGAATAGGACAGAGAGCC	TCCCATAACATTCATTCACCA				isPCR	unmapped	10	23	D10Mit45
D10Mit51	D10Mit51		MGI:88835	MGI:703405	CTTGAGCCTACGTGACCACA	TGCAGTCCCTCACACATATACA				isPCR	unmapped	10	9	D10Mit51
D10Mit62	D10Mit62		MGI:88846	MGI:704642	CCCAATGGCAGAGCTCATAT	TCCATCGTGGGCAATCTAC				isPCR	unmapped	10	34	D10Mit62
D10Mit66	D10Mit66		MGI:88850	MGI:704647	TCTCCTTGGAATTCACAGCC	GACATTCCTTAAGAGAGACAGTCC				isPCR	unmapped	10	49	D10Mit66
D10Mit75	D10Mit75		MGI:88860	MGI:705194	TATGAATGTGTATATGTGTATACCCCC	AAATGCATTGTGGGTGACAT				isPCR	unmapped	10	2	D10Mit75
D10Mit8	D10Mit8		MGI:88865	MGI:701268	AGTGTTAGTGGCTGGGGTG	TGAACGTTTCAGTTGGTCCA				isPCR	unmapped	10	47	D10Mit8
D10Mit83	D10Mit83		MGI:88869	MGI:701401	GGAAAGACACCCAAAGGTGA	CCATAATAACACTCCTCAAATGACT				isPcr	unmapped	10	7	D10Mit83
D11Mit107.2	D11Mit107.2		MGI:3622345	MGI:707296	ACTCTCTTCCCTCACATTCCTTC	GTGAGAAGGGGTCTTACTTCCAT				isPCR	unmapped	11	syntenic	D11Mit107.2
D11Mit125	D11Mit125		MGI:89007	MGI:703680	CAATGGAGGAGCTTTGGAAA	GACACTGGATTATTCCTCCTGC				isPcr	unmapped	11	62	D11Mit125
D11Mit126	D11Mit126		MGI:89008	MGI:703677	TCTATGGGGCTCTCCAACC	AAGAACTCATCTTCCAAGAGCC				isPcr	unmapped	11	63	D11Mit126
D11Mit15	D11Mit15		MGI:89034	MGI:703854	TGACATTTGGCGGAGCTAAC	ACATGTACTTGCCAGGGTAC				isPCR	unmapped	11	40	D11Mit15
D11Mit158	D11Mit158		MGI:89043	MGI:702353	ACATGTGTACCTTCATATACATGTGC	CTGAACTCTGAGCCTCCTGC				isPCR	unmapped	11	47	D11Mit158
D11Mit16	D11Mit16		MGI:89045	MGI:703853	CAGCTAGAAATGGCAATGAGG	CTTGTTCTACACCCAGCAAGC				isPCR	unmapped	11	0.25	D11Mit16
D11Mit183	D11Mit183.2		MGI:89069	MGI:702994	TTCAGACTTCAAGACCTCATGGT	AGGAAGCGTTAGAAGGAAGAAGA				isPCR	unmapped	11	71	D11Mit183
D11Mit192	D11Mit192		MGI:89079	MGI:701085	TATGTGGGGTGCACATGC	AAGAGGGCAATGTGTTCCTG				isPCR	unmapped	11	37	D11Mit192
D11Mit193	D11Mit193		MGI:89080	MGI:701084	TGCTAAGTCTTTAAAATGCTGCC	AGCCTCAGACCAGGAGAGC				isPCR	unmapped	11	36	D11Mit193
D11Mit2	D11Mit2		MGI:89087	MGI:705871	TCCCAGAGGTCTCCAAGACA	CCACAGTGTGTGATGTCTTC				isPCR	unmapped	11	2.4	D11Mit2
D11Mit22	D11Mit22		MGI:89105	MGI:704577	TGGATGCAATGTGGTGACTT	AACCTTGCCCCAAGAGATG				isPcr	unmapped	11	25	D11Mit22
D11Mit227	D11Mit227		MGI:101264	MGI:705006	CCAGCATTTGAACCCTGATT	AAACCCATAGCCTGCATCTG				isPCR	unmapped	11	2	D11Mit227
D11Mit236	D11Mit236		MGI:101255	MGI:703220	TGCCACTTCTTTAATACATGCG	AATTTCCTTCTACTCCTCTCTGAGC				isPCR	unmapped	11	20	D11Mit236
D11Mit25	D11Mit25		MGI:89108	MGI:702027	AGGAGGTCTCTTTAAGTACTCCTAT	TCTGTATGTGGCTTAATGGG				isPCR	unmapped	11	27.5	D11Mit25
D11Mit256	D11Mit256		MGI:101235	MGI:706807	GCAGGGTGAAGTTTGGAGAA	GGAGAACGTGGACATGGTCT				isPCR	unmapped	11	74	D11Mit256
D11Mit258	D11Mit258		MGI:101233	MGI:706797	AAACAGAGATAAACCACGGGG	TGTGGAACTAACTCTCAGAAGGC				isPCR	unmapped	11	65	D11Mit258
D11Mit263	D11Mit263		MGI:101228	MGI:704581	GAAACCATTTTAAAATATACAGTTCGG	CCAGGGTTAGGTAGGTATGGC				isPCR	unmapped	11	55.6	D11Mit263
D11Mit289	D11Mit289		MGI:101202	MGI:700592	CTTTGGTTGGTTTTAAATGTTTTAA	AAGGAGAAAGCAGATTCATACACA				isPCR	unmapped	11	55	D11Mit289
D11Mit299	D11Mit299		MGI:101192	MGI:706368	ATCTCCGTAGAATATGTACATACCACA	CTGAGTTATTGGGGGGCTC				isPCR	unmapped	11	44	D11Mit299
D11Mit303.1	D11Mit303.1		MGI:3613838	MGI:702211	TACAACTTGATTAGGCTGAAGGG	AGTACAGAAAGAGTCAGGGGCAC				isPcr	unmapped	11	syntenic	D11Mit303.1
D11Mit312	D11Mit312		MGI:102278	MGI:704208	TCCATCACTAGGGGAAATCG	TGATGACCCCTTACAAAATGG				isPCR	unmapped	11	28	D11Mit312
D11Mit318	D11Mit318		MGI:102284	MGI:701186	CTGCTTCTGCCATTCTATTGC	CTGATCTCACACACGAGCGT				isPCR	unmapped	11	34	D11Mit318
D11Mit324	D11Mit324		MGI:102290	MGI:703394	CTGGTCTACGTTGAGTGCCA	AGAGAGAACAGCAAACATTCAGG				isPCR	unmapped	11	47	D11Mit324
D11Mit329	D11Mit329		MGI:102295	MGI:703399	TGAAGAGTTGTTCATTCTTAGTTTGC	GAACCGCAAGTAAAACTTCTCA				isPCR	unmapped	11	61	D11Mit329
D11Mit335	D11Mit335		MGI:102301	MGI:705168	AAGATTGAGCCTCCCTACCC	CTAACATAGATGGATTCTCCCCC				isPCR	unmapped	11	75	D11Mit335
D11Mit337	D11Mit337		MGI:102304	MGI:705166	CCTGGCAACCTTCCACTTTA	ACCTTCTGACCTCCACATGTG				isPCR	unmapped	11	75	D11Mit337
D11Mit344	D11Mit344		MGI:105805	MGI:707384	AGAAAGAATGGCTAGAGGACTCC	CATGCGACCCATCTTTCC				isPCR	unmapped	11	16	D11Mit344
D11Mit35	D11Mit35		MGI:89118	MGI:700268	AGTAACATGGAACATCGACGG	TGCTCAGCTCTGGAGTGCTA				isPCR	unmapped	11	47.59	D11Mit35
D11Mit353	D11Mit353		MGI:105814	MGI:701572	AAACCTCATGTTCAGTAATAAATCCC	AGATCAGTCACAGGCGCAC				isPCR	unmapped	11	45	D11Mit353
D11Mit356	D11Mit356		MGI:105817	MGI:701569	GGCAAGCAACTTCTTCCATC	TTCAGAAATTTGGGTATTAGAGTGG				isPCR	unmapped	11	50	D11Mit356
D11Mit36	D11Mit36		MGI:89119	MGI:707129	CCAGAACTTTTGCTGCTTCC	GTGAGCCCTAGGTCCAGTGA				isPCR	unmapped	11	47.64	D11Mit36
D11Mit50	D11Mit50		MGI:89130	MGI:700386	GAAAGGGGGCAGAGAGTCTT	TGTACAACTTGACTGTTGATCACA				isPcr	unmapped	11	66	D11Mit50
D11Mit53	D11Mit53		MGI:89133	MGI:704046	GTGGATACAGAGTGGATACAGGG	GTAACCAAGATGCAAGGGGA				isPCR	unmapped	11	16	D11Mit53
D11Mit65	D11Mit65		MGI:89143	MGI:1347873	CAGAACTGCATCTCAAAAAAACA	CAGCTCCTGCATCACACG				isPCR	unmapped	11	43.77	D11Mit65
D11Mit67	D11Mit67		MGI:89145	MGI:702455	AAAAAAAAAAAGTTCAAGGCTGG	GGAACTCAACTCCTAGAACTTCTG				isPCR	unmapped	11	57	D11Mit67
D11Mit73	D11Mit73		MGI:89152	MGI:700681	TCGAATTTTGATCATGAAGGC	GTTACCGCAATCACAGCAGA				isPcr	unmapped	11	1	D11Mit73
D11Mit73	D11Mit73.1		MGI:89152	MGI:702176	CGAATTTTGATCATGAAGGC	CTGTCATAAAATCCAATGTGCCAG				isPcr	unmapped	11	1	D11Mit73
D11Mit81	D11Mit81		MGI:89161	MGI:704846	ATCGGCTATATTCCCATCCC	AGCAAATATAGTGCTGCACTGTG				isPCR	unmapped	11	13	D11Mit81
D11Mit88	D11Mit88		MGI:89168	MGI:704838	GGGTCTTGAAGGACTTGTTCC	AGAGCCATGGAACATTTGCA				isPCR	unmapped	11	34.45	D11Mit88
D11Mit91	D11Mit91	D11Mit91	MGI:89171	MGI:703256	TCCTCTGGAGGGGAATCAC	CTGGGATTTCGGGAGTATACC				isPCR	unmapped	11	46	D11Mit91
D12Mit1	D12Mit1		MGI:89342	MGI:702646	TACCCGGGGATCTTTTGTTT	AAGTGGACTGCCAGAGGATG				isPcr	unmapped	12	2	D12Mit1
D12Mit100	D12Mit100		MGI:89344	MGI:704853	GTTTAGATCACGGGTGCACA	CTGTGCCTGGGAATAAGCAT				isPCR	unmapped	12	50	D12Mit100
D12Mit1009	D7Mit36		MGI:94063	MGI:701711	TGGTGGATTTTATTTGTTAGTTTG	TAGGATTTCCCACATGTGCA				isPCR	unmapped	12	syntenic	D12Mit1009
D12Mit12	D12Mit12		MGI:89365	MGI:704108	TTCAATGCCTTCTGGCTTCT	GATTACCGGGTGTGTGACCT				isPCR	unmapped	12	6	D12Mit12
D12Mit130	D12Mit130		MGI:89377	MGI:707172	AAGCCTTTCTTTTTTTAAAAGATTTG	GGTGCTGCAGGCAGTGTATA				isPCR	unmapped	12	32	D12Mit130
D12Mit131	D12Mit131		MGI:89378	MGI:707173	GGAGTTATACTTCAAAGATGCTCTCC	AGTCCTCTGAATGCCCTCCT				isPcr	unmapped	12	50	D12Mit131
D12Mit135	D12Mit135		MGI:89382	MGI:707169	AGTGCCTCTCTCTTGTTCTTGG	AGTAGAGAGTGTGGACATACGTGTG				isPCR	unmapped	12	1	D12Mit135
D12Mit139	D12Mit139		MGI:89386	MGI:701165	TTGCATTGAGTGTGCTGTGA	TATAGACCTGTTAACCAGATCAGGG				isPCR	unmapped	12	52	D12Mit139
D12Mit14	D12Mit14		MGI:89387	MGI:703180	GAGAGAGTTTCCCTTGTTGTCG	AACTCTCTAGGCAGAGTGCCC				isPcr	unmapped	12	37	D12Mit14
D12Mit157	D12Mit157		MGI:89406	MGI:703194	TGAGCGTGCGCGTTATAC	AGGTTAATATCCTGACCATCACC				isPcr	unmapped	12	37	D12Mit157
D12Mit160	D12Mit160		MGI:89410	MGI:700988	CTGCTGGCTCCATGGTTATT	CTGTGTAGCATGACAACTTCTGC				isPCR	unmapped	12	39	D12Mit160
D12Mit17	D12Mit17		MGI:89420	MGI:703179	TCCGAGTGTTGCTTCTCCTT	CCTTAGATGCTCAAGGCTGG				isPCR	unmapped	12	55	D12Mit17
D12Mit174	D12Mit174		MGI:89425	MGI:706774	CTGCAGACACTCACACATAAGTATATG	TCTTGATCTCACCCCTTAAAATG				isPCR	unmapped	12	32	D12Mit174
D12Mit175	D12Mit175		MGI:89426	MGI:702885	CTGACTCTGTGTTTATGCACCC	TCCACTCCCAAACGTAGTCC				isPCR	unmapped	12	32	D12Mit175
D12Mit205	D12Mit205		MGI:101165	MGI:707265	GATGGGTGGAGCACAGAAAT	GAAGACTTGGAGTTGTCACTTGG				isPCR	unmapped	12	41	D12Mit205
D12Mit208	D12Mit208		MGI:101162	MGI:704069	TTTCTTTCTGATGGAAATACTTTGA	TCAAATGACCAAAATTATAGTGCA				isPCR	unmapped	12	59	D12Mit208
D12Mit218	D12Mit218		MGI:101152	MGI:706880	ACGTTCTTACTCTTTTATGTCTGCG	ACCTCATAATGTCGCTGATCG				isPCR	unmapped	12	6	D12Mit218
D12Mit223	D12Mit223		MGI:101147	MGI:706478	TAGGTGAGGAAGAAATGATATCACC	ATTGTATATACATTTTTTTCCCTGTGG				isPCR	unmapped	12	22	D12Mit223
D12Mit229	D12Mit229		MGI:101141	MGI:706502	ACCCAGGTAATGTAATCTCCTAGG	AGGTCACACATGACTGTAAAATGG				isPCR	unmapped	12	41	D12Mit229
D12Mit233	D12Mit233		MGI:101137	MGI:701856	AGGCTCACAGAAAAAGTGAACC	TGAAGCAGTCTGACCAGGTG				isPcr	unmapped	12	52	D12Mit233
D12Mit234	D12Mit234		MGI:101136	MGI:701859	TGAATGGATACATTTATACTGGTGTG	AAGGCATTTTCTATGAGTCAAAGG				isPcr	unmapped	12	6	D12Mit234
D12Mit242	D12Mit242		MGI:102307	MGI:704517	CATTTGGCACTGAGCATCTG	TCATTTTATTTATTCTTGCTTGTGTG				isPCR	unmapped	12	13	D12Mit242
D12Mit250	D12Mit250		MGI:102315	MGI:700907	ACCACCGTGTAACTAAAATGCC	GGAGAGACAGTAGTAGTAAACTGTGTG				isPCR	unmapped	12	29	D12Mit250
D12Mit256	D12Mit256		MGI:102321	MGI:706292	GTTCAAGGGCTACACAGAGACA	GGACTTCCTGAGACCCAACA				isPCR	unmapped	12	40	D12Mit256
D12Mit260	D12Mit260		MGI:102324	MGI:700512	AGATATTATCTGACCCCAGTACACA	TAAATGGATTCTCTCTGAATCAACA				isPcr	unmapped	12	45	D12Mit260
D12Mit265	D12Mit265		MGI:105439	MGI:700491	CACGACTTCCCCTCATCG	GGCTACACAGAAAAACCATATCTC				isPcr	unmapped	12	1	D12Mit265
D12Mit272	D12Mit272		MGI:105432	MGI:707701	ATTTTGGGGTAGTGTACATGCC	CACATACATCTGCATGCGTG				isPCR	unmapped	12	22	D12Mit272
D12Mit279	D12Mit279		MGI:105425	MGI:702278	CCCTAGGAAGAGATCACTGTGG	AGTGTGATGGAGATGCTGTATACA				isPCR	unmapped	12	53	D12Mit279
D12Mit283	D12Mit283		MGI:106941	MGI:704875	TGCTTAGACAAGAAAGAGATAAAGACA	CTTTTAAGCACCCTACCCCC				isPCR	unmapped	12	11	D12Mit283
D12Mit289	D12Mit289		MGI:106947	MGI:704095	ATAGAGTGAGATCTTGTCTCTCTCACA	ACACATGTATATATGCATAGGAATCAA				isPCR	unmapped	12	50	D12Mit289
D12Mit41	D12Mit41		MGI:89450	MGI:701749	TGCGTTAATGGGTCTGATAGG	AATTCCAAAACAACAGCATGC				isPCR	unmapped	12	58	D12Mit41
D12Mit41.1	D12Mit41.1		MGI:3613865	MGI:703150	CCCCTGTATCCTTTCCTCTTCTA	CCACAGCTCTTAAGTGTCCAAGT				isPcr	unmapped	12	syntenic	D12Mit41.1
D12Mit41.3	D12Mit41.3		MGI:3623335	MGI:703263	CACTCATGCATGCTGTTGTTTT	GGTCTGTTTATTTCCCCTGTTTC				isPCR	unmapped	12	syntenic	D12Mit41.3
D12Mit43	D12Mit43		MGI:89451	MGI:701751	CAGAACGGGAAGCTATGATACC	GATTTATTTGGCCCCAGACC				isPCR	unmapped	12	3	D12Mit43
D12Mit44	D12Mit44		MGI:89452	MGI:701746	GAATTTCTGTGCCAGTGGGT	ACAAAGATTGTGATGAAATTGAGC				isPcr	unmapped	12	0	D12Mit44
D12Mit44	D12Mit44.1		MGI:89452	MGI:701868	CGTCTGCACCCGCTACTAAA	TTACCCAGTAAACTGGGAGTGG				isPcr	unmapped	12	0	D12Mit44
D12Mit47	D12Mit47		MGI:89455	MGI:701747	TTTTTTTTTCTGTTGCATGGC	CATGATATCATGGCCTCTAAAGG				isPCR	unmapped	12	45	D12Mit47
D12Mit73	D12Mit73		MGI:89482	MGI:707158	TGCAAATACATAAACACACAGCC	CCGTTAAGCACATGCCCTAT				isPCR	unmapped	12	28	D12Mit73
D12Mit9	D12Mit9		MGI:89500	MGI:702638	AACAATGGCAAACAAATCTGC	CAAGTTGGACTTTGGGATTTG				isPCR	unmapped	12	2	D12Mit9
D13Mit10	D13Mit10		MGI:89635	MGI:704521	AGTCCTGCCATTTGTCCTCTGACC	ATGTCTTAGTCTCACATGCTGGGG				isPCR	unmapped	13	31	D13Mit10
D13Mit100	D13Mit100		MGI:89636	MGI:700410	AATATAAGCAGTATTTTACGTTGTGTG	GACTGGTGCTGAGGGTCTGT				isPcr	unmapped	13	40	D13Mit100
D13Mit1004	D18Mit223		MGI:105400	MGI:705479	TTCAGGTCAGCCAAGAGATACA	CACTGCCTAGCCCTCCTTAC				isPCR	unmapped	18	8	D13Mit1004
D13Mit101	D13Mit101		MGI:89637	MGI:700411	TGGTGGCGTCTTGGCTAC	GATACAAGAATAGCCAGCATAGTTACC				isPcr	unmapped	13	40	D13Mit101
D13Mit11	D13Mit11		MGI:89646	MGI:701299	CATGGCTCCTTTAACCTGTTT	CAATGATTAACCCTTGAAAAAACA				isPCR	unmapped	13	40	D13Mit11
D13Mit161	D13Mit161		MGI:89702	MGI:704006	TCACGCACCAGTGGGTAGTA	GTCACTGTGTGTGTGCATGC				isPcr	unmapped	13	52	D13Mit161
D13Mit167	D13Mit167		MGI:89708	MGI:704012	GCAGTGTCAATTGTGACATGG	CCCCACAGACATGAACACAC				isPCR	unmapped	13	36	D13Mit167
D13Mit171	D13Mit171		MGI:89712	MGI:705777	TTTCCATCTCCATAACACAATAGTG	CCCAACGATTTGCAGGTACT				isPCR	unmapped	13	71	D13Mit171
D13Mit181	D13Mit181		MGI:89723	MGI:705345	TTATTTGACAGGGGTTTTCCC	GGCTCTTCTAGGCTCTGCAA				isPCR	unmapped	13	30	D13Mit181
D13Mit186	D13Mit186		MGI:89728	MGI:705324	GAAAGCCCTAGGGGAAGATG	TGCAGTTTCTAAGGTTAAAACTAAAGC				isPCR	unmapped	13	36	D13Mit186
D13Mit19	D13Mit19		MGI:89732	MGI:704525	GGTGAGTTGTGTAATGATGGACA	AGCAACAGGGCTACTAAACACA				isPCR	unmapped	13	24	D13Mit19
D13Mit192	D13Mit192.2		MGI:89735	MGI:704322	CCAGGATTCAAATATGAGACACAAC	CGAGCTCGGTACCTGTAAAGAA				isPCR	unmapped	13	43	D13Mit192
D13Mit214	D13Mit214		MGI:101121	MGI:702311	CCATATACCCCTCTAATTCATTGC	TTGGTTATCTGATACAAAATAGCACA				isPCR	unmapped	13	71	D13Mit214
D13Mit23	D13Mit23		MGI:89750	MGI:707709	GAGAATCTACCACGGCTACCC	CCCCAAAGAAATCTTGTCTCA				isPcr	unmapped	13	35	D13Mit23
D13Mit232	D13Mit232		MGI:101103	MGI:706320	AAAAAGGTCAGGTTATATGACTAGCC	GTGGTTGATTAAATATCATAACACACA				isPCR	unmapped	13	44	D13Mit232
D13Mit240	D13Mit240		MGI:101095	MGI:703707	GGTCCCCCCTCTAACATCAT	GACTCCTACTTTAATCACATAACACCC				isPcr	unmapped	13	9	D13Mit240
D13Mit261	D13Mit261		MGI:101074	MGI:707720	TCTCATACTTTTCCTTTTTGATTCTC	AAGCCTTGGATTCACTCCCT				isPCR	unmapped	13	68	D13Mit261
D13Mit263	D13Mit263		MGI:101072	MGI:707718	GTGTGTGCATGTCCTTCCAC	ATATACACATATTTTACTCCCTCCCC				isPcr	unmapped	13	71	D13Mit263
D13Mit271	D13Mit271		MGI:102329	MGI:705877	CACTTGTATTTTTACACATTTGTTGTG	ACAACTCTCACCTCAAAAGATGC				isPCR	unmapped	13	9	D13Mit271
D13Mit272	D13Mit272		MGI:102330	MGI:705878	AGGAGGAAAGGAGAGTAGCAGT	TTTATGCAAGTATCATTAGGTGTCG				isPcr	unmapped	13	10	D13Mit272
D13Mit3	D13Mit3		MGI:89757	MGI:705960	TCAGGCTCATCCCAGATACC	TTTTGCAGAGAACACACACC				isPCR	unmapped	13	10	D13Mit3
D13Mit306	D13Mit306		MGI:105830	MGI:705375	TACTGTAAGATACTGTGTTGGAAATCC	AACCCTGATCAACTTTAGAAGAGG				isPCR	unmapped	13	10	D13Mit306
D13Mit317	D13Mit317		MGI:105840	MGI:707189	CATGAAAACCATGTGTGAAAGA	AAGTGAGCATGCACCCAATA				isPCR	unmapped	13	61	D13Mit317
D13Mit37	D13Mit37		MGI:89764	MGI:700504	AACTGTCTCCTTCCTGTTTTTCC	AGACCACTGACTTTGCAGTAAGC				isPcr	unmapped	13	51	D13Mit37
D13Mit37b	55-2	D13Mit37a	MGI:109453	MGI:8561	GATCTCTCCCAGCAGTATTTGG	GCTCAGGAAAAAAAATGGAGG				isPCR	unmapped	13	55	D13Mit37b
D13Mit39	D13Mit39		MGI:89766	MGI:700502	AGGGACAGGCACTCTTAGCA	CACAAGGCAGACTGGTCAGA				isPCR	unmapped	13	37	D13Mit39
D13Mit4	D13Mit4		MGI:89767	MGI:705963	TGTGGGACAACTGTGACAAA	CACCCAAGGCCCACTTC				isPcr	unmapped	13	17	D13Mit4
D13Mit5	D13Mit5		MGI:89776	MGI:702583	AGAAGCCAGCAGGTGTTTTC	CCAGGAAGTAACCCCAAACA				isPcr	unmapped	13	31	D13Mit5
D13Mit59	D13Mit59		MGI:89786	MGI:704071	ACCCCCACACCTTATGCATA	GTACGCTCAATGAATTTAATGTGC				isPCR	unmapped	13	16	D13Mit59
D13Mit63	D13Mit63		MGI:89790	MGI:701806	GAGATGGAAGGAAGAGATGGC	CAAATGCATGTATCCGTATGTG				isPCR	unmapped	13	26	D13Mit63
D13Mit7	D13Mit7		MGI:89797	MGI:705964	CGGTACCCGGGGATCTAC	AGCCCAGCTTGTGAAGTGTT				isPcr	unmapped	13	37	D13Mit7
D13Mit8	D13Mit8.2		MGI:89808	MGI:700533	TTGAACCAAATCTTCCAGCC	ACCACCAGGAAAACCACCTAT				isPCR	unmapped	13	40	D13Mit8
D13Mit8	D13Mit8		MGI:89808	MGI:705958	GCCCCATTTCTGAAGTTTCA	AATAGACTCTTCAGCCCCCC				isPCR	unmapped	13	40	D13Mit8
D14Mit1002	D10Mit157.2		MGI:88777	MGI:702623	ACAGGATTTCTCTGTGTAGCCC	GCCTTTAATCCCAGCACTTG				isPcr	unmapped	14	syntenic	D14Mit1002
D14Mit1010	D10Mit78		MGI:88863	MGI:705189	CCCCTTCCTCACCCTTACTT	ACCAAACAGGAGGCACCAT				isPCR	unmapped	10	4	D10Mit78
D14Mit111.3	D14Mit111.3		MGI:3613883	MGI:702785	GTCCTTCTCCATCACTCTTTCCT	GGCCATAGTCAATCCATAATGTG				isPcr	unmapped	14	syntenic	D14Mit111.3
D14Mit139	D14Mit139		MGI:89979	MGI:705212	GGAAGGGGAAGAGACACACA	TCTCTTCTCAGATTCATTTGTTTCC				isPcr	unmapped	14	13.5	D14Mit139
D14Mit144	D14Mit144		MGI:89985	MGI:703441	ATACTTGGATTATAGGCATATTTACGC	GTGCCATTTCCCATGAGC				isPCR	unmapped	14	47	D14Mit144
D14Mit147	D14Mit147		MGI:89988	MGI:703442	TCCCTCAGTGCTTGAGCC	CTTAATTTCACTCATTGTGATGTGG				isPCR	unmapped	14	2.5	D14Mit147
D14Mit148	D14Mit148		MGI:89989	MGI:703450	CCCAGTGAGGTTTTTTTAAAGG	TGGTCCCCCTTGTATTTTGA				isPCR	unmapped	14	5	D14Mit148
D14Mit155	D14Mit155		MGI:89997	MGI:701617	AGGGTGCTTTAGTTAGAGATTTCC	GATAAAAACAAATTCTGAGGTCTCTC				isPCR	unmapped	14	25	D14Mit155
D14Mit156	D14Mit156		MGI:89998	MGI:701614	CAAACCTCTGTGGGCTTGTT	CTATCCCTGTCAGTTCCAAAGG				isPCR	unmapped	14	27.5	D14Mit156
D14Mit16	D14Mit16		MGI:90002	MGI:706593	ATGATGCCAACCTCTGGC	AATGCAGAAAAAAACCCGC				isPcr	unmapped	14	13.5	D14Mit16
D14Mit160	D14Mit160		MGI:90003	MGI:707490	CAAAATTAGCAAGGATTCCAGG	AGTTTAATCTCTTGGCTTTTGGG				isPCR	unmapped	14	40	D14Mit160
D14Mit165	D14Mit165.3		MGI:90008	MGI:701151	ATTTTTCTCAGCGTTGTGGGT	ACTTTATGCCTTCCGGCTCC				isPCR	unmapped	14	52	D14Mit165
D14Mit166	D14Mit166		MGI:90009	MGI:707492	TGGGGTTAGAGTAACTAGAATATAGGG	GGGGGCATTGTATGCTTAAA				isPCR	unmapped	14	52	D14Mit166
D14Mit17	D14Mit17		MGI:90013	MGI:706594	TGTGTTGATTTCAAGTTTACAGGG	GCCTTTGGTCCTCACTCAAG				isPcr	unmapped	14	13	D14Mit17
D14Mit182	D14Mit182		MGI:101061	MGI:703909	CAAGTCTCCAGCATCTGAAGG	ACTCTGGCTTTCATGTGCCT				isPcr	unmapped	14	13.5	D14Mit182
D14Mit185	D14Mit185		MGI:101058	MGI:703910	TCAATTTGGGTTTCCTCTTCC	GATCCAGAACTTGAGCACTGG				isPCR	unmapped	14	54	D14Mit185
D14Mit190	D14Mit190		MGI:101053	MGI:702087	AGCGAGAATTCCTTTATATCTTTTG	AGAGTGAGGTCCCAGGGATA				isPcr	unmapped	14	19.5	D14Mit190
D14Mit191	D14Mit191		MGI:101052	MGI:707780	GTTCCCAGGGAATCCAATG	GGACTTGCTGCAAGCCTAAG				isPcr	unmapped	14	27.5	D14Mit191
D14Mit196	D14Mit196		MGI:101047	MGI:702089	CAGGCACAAACAAGTGCTGT	GTGAGTTCTAGGACATCCCAGG				isPCR	unmapped	14	47	D14Mit196
D14Mit198	D14Mit198		MGI:101045	MGI:702093	TAACCAATTGTAATTGCTTTAATGTG	ACTAGGCAAGTTATATTTAGCAACACA				isPCR	unmapped	14	54	D14Mit198
D14Mit20	D14Mit20		MGI:90026	MGI:704250	GGAGTGGCAGATGGTTGTTT	TGTTGGCTACTTCTCCAGGG				isPCR	unmapped	14	19.5	D14Mit20
D14Mit203	D14Mit203		MGI:101040	MGI:706946	GTTAGCCAATTTAGAGGAGAGCC	CAGAACTCCAGTCTAACTATCACACA				isPCR	unmapped	14	28.3	D14Mit203
D14Mit211	D14Mit211		MGI:101032	MGI:701168	AGACATGGACTCCTCATAGAGACC	TGCATAGACCATGGGGTACA				isPcr	unmapped	14	13.5	D14Mit211
D14Mit214	D14Mit214		MGI:101029	MGI:701173	GGTGGGCAAGTCCTTACAAA	CATCATGGTCACTTTAAACCCA				isPCR	unmapped	14	19	D14Mit214
D14Mit223	D14Mit223		MGI:101020	MGI:703372	TTGTTCTCAGGAGCGCAAG	TCACTGACATGTGTGCCCTT				isPcr	unmapped	14	28.3	D14Mit223
D14Mit226	D14Mit226		MGI:101017	MGI:703375	AGGATCCCCCCAGAAGTAGA	ATAGTCAGTGTTTGCATACATGCA				isPcr	unmapped	14	44.4	D14Mit226
D14Mit228	D14Mit228		MGI:101015	MGI:703367	TTGTTAATTGCTGTTACCATACACA	ACGTACTCAGTGGATTGTAAATGTG				isPCR	unmapped	14	46	D14Mit228
D14Mit235	D14Mit235		MGI:102359	MGI:705138	GAAGGATCATCCACTGTGAACA	CACCAACTTGACACAAGGTCC				isPCR	unmapped	14	28.2	D14Mit235
D14Mit25	D14Mit25		MGI:90028	MGI:701211	GGAGTGGCAGATGGTTGTTT	TAATCAGCAGTTAAGAGTGTTGGC				isPCR	unmapped	14	19.5	D14Mit25
D14Mit250	D14Mit250		MGI:105842	MGI:701545	CCATAGCACACGTGAGTAGCA	ATGCATTGATATGCCTGGCT				isPCR	unmapped	14	1.75	D14Mit250
D14Mit262	D14Mit262		MGI:105854	MGI:703760	CAGAAGGGAAATCTTAAAATGAGG	CAACTTAGATGCATACACAGTTTGC				isPCR	unmapped	14	28.4	D14Mit262
D14Mit264	D14Mit264		MGI:105856	MGI:703754	AGTCATTTAACTTTAACTTCGTGTGTG	AGAGAATATGATGTCATCTTTTGGC				isPCR	unmapped	14	47	D14Mit264
D14Mit29	D14Mit29		MGI:90032	MGI:701215	GAGGAAGGGGTATGTGGGAG	GCAGAACCCAAAGAGGAGAG				isPcr	unmapped	14	28.2	D14Mit29
D14Mit29	D14Mit29.1		MGI:90032	MGI:702941	AGTTCAATCCAGGAACCCAA	CATTTAACCCCTTTCTATTTCTCCC				isPcr	unmapped	14	28.2	D14Mit29
D14Mit30	D14Mit30		MGI:90034	MGI:703031	ATTTGGTGTTGAGGCCATGT	CTTTGTCCTTTGTCATCAAAAGG				isPCR	unmapped	14	29	D14Mit30
D14Mit36	D14Mit36		MGI:90040	MGI:703025	ATTTTTAGGAGCTGGAGCTGC	CCCTAGGGCCACCATAGAAT				isPcr	unmapped	14	63	D14Mit36
D14Mit40	D14Mit40		MGI:90045	MGI:705041	TCCCGGGGATCAGTAAAATAT	CAAGGTGGCCTCTGACTTTC				isPcr	unmapped	14	2.5	D14Mit40
D14Mit42	D14Mit42		MGI:90046	MGI:705188	GTGTCACTTTCTCCCTGTGAG	TTATACACATGTACATGCATGCA				isPCR	unmapped	14	52	D14Mit42
D14Mit55	D14Mit55		MGI:90060	MGI:704658	AGGATAATGGACAAGCGCAT	TTTGTCTCTCAGTTTTTCTCTCTG				isPcr	unmapped	14	10.5	D14Mit55
D14Mit88	D14Mit88		MGI:90096	MGI:707730	CTTTTCAGCCCACTCTTTGC	CAGTTTGTTTTCTGATTTACACACG				isPCR	unmapped	14	28.2	D14Mit88
D14Mit9	D14Mit9-pA	D14Mit9b	MGI:90098	MGI:191	GGTTCCTCCATGTTCCTAGT	GAAGACTAGGGTACATGATGGG				isPCR	unmapped	14	54.5	D14Mit9
D14Mit9	D14Mit9		MGI:90098	MGI:701521	AGGGGAAGGGAAGATGAAGA	GGTGTGACCACTGCCTAGGT				isPcr	unmapped	14	54.5	D14Mit9
D15Mit1	D15Mit1		MGI:90227	MGI:707727	AACATGGTCCCACAGGTGTC	AGTAGAAGCTGCAGCCCTGG				isPCR	unmapped	n/a	n/a	n/a
D15Mit1006	D9Mit241.2		MGI:3614180	MGI:702730	CCAGGCACTGGCTTTAAAAA	GGCCCGCATTGATTCTTTAG				isPCR	unmapped	15	syntenic	D15Mit1006
D15Mit111.1	D15Mit111.1		MGI:3613897	MGI:706170	TTCAGAGCCCTTCCAGAGTTTT	CATTGCCTTCTGAAACAAGG				isPcr	unmapped	15	syntenic	D15Mit111.1
D15Mit116	D15Mit116		MGI:90246	MGI:704945	CAAAAACCACTCATATTTGAAATCC	GCCACACATGTTGTCCTTTG				isPCR	unmapped	15	25.4	D15Mit116
D15Mit129	D15Mit129		MGI:90260	MGI:701865	GATCAATAAAAGTGTATGGCATGG	TAGGTGTTTTATTTCTATTGCCTCG				isPCR	unmapped	15	11.4	D15Mit129
D15Mit15	D15Mit15-pA	D15Mit15-pB	MGI:90283	MGI:7172	TTCCTGCTCCCACCTTCCTGAG	GAATCATCTTCTATATCTTCAGG				isPCR	unmapped	15	57.4	D15Mit15
D15Mit158	D15Mit158		MGI:90292	MGI:704534	GCTCTCTCAGTCATATGTGGAGG	TTTCTCTTCGCAGGTGCC				isPCR	unmapped	15	46.9	D15Mit158
D15Mit164.2	D15Mit164.2		MGI:3613905	MGI:703317	TTTTCTCACAGCACATGTGC	GCCGAGAGTTTGTCTCATGG				isPcr	unmapped	15	syntenic	D15Mit164.2
D15Mit170	D15Mit170		MGI:101005	MGI:706391	AAGGAGCAGAAAACATCAACG	CTCTGGCTGTGAGAACCACA				isPCR	unmapped	15	51.1	D15Mit170
D15Mit194	D15Mit194		MGI:100981	MGI:704094	AAAAGGGGGCTGCCTCAG	CATGGATGACTCTTAACTTTTTCTACC				isPcr	unmapped	15	62.8	D15Mit194
D15Mit203	D15Mit203		MGI:100972	MGI:701141	ATGCATTGAATCAATCCAAGG	TTGTGTTTTTACTTCTTGCTCTCG				isPCR	unmapped	15	18.7	D15Mit203
D15Mit220	D15Mit220		MGI:100955	MGI:704731	CCCAAAAGATTGTTCTCTGACC	TATTAATTTGTAAGTGGTAAGGAGGTG				isPCR	unmapped	15	21.1	D15Mit220
D15Mit223	D15Mit223		MGI:100952	MGI:704732	GCAAGCACCTTCATGTACACC	AGGATGGGAGCCATCCCT				isPcr	unmapped	15	55.2	D15Mit223
D15Mit226	D15Mit226		MGI:102369	MGI:704737	ATCTCACGCTTCTCCCTTCA	TGATGCTTGGATCTTGTGGA				isPCR	unmapped	15	11.6	D15Mit226
D15Mit228	D15Mit228		MGI:102372	MGI:704729	TTTGTAAAGAAATGTTTTGCATCC	AAATTTTTGAGGGAATCAGTTCC				isPCR	unmapped	15	22.2	D15Mit228
D15Mit239	D15Mit239		MGI:102382	MGI:701779	AAGTGCCACCCTCCACAAC	ACTGAGCCACTTGCCAGC				isPcr	unmapped	15	48.2	D15Mit239
D15Mit252	D15Mit252		MGI:105862	MGI:707371	CTTCAAACATGTTATCATTGTCACA	CTTCTGTATTCACAGGTGCTCG				isPCR	unmapped	15	15	D15Mit252
D15Mit258	D15Mit258		MGI:105868	MGI:707362	TGATTTGCTTCAAAGATTTAAATTC	CTTCATGCAATACTGCGGC				isPCR	unmapped	15	40	D15Mit258
D15Mit260	D15Mit260		MGI:3629891	MGI:703015	CAGGAGATCTGGAGAAAG	ATGTCTATCAAGCCATGTAACT				isPCR	unmapped	15	46.6	D15Mit260
D15Mit268	D15Mit268		MGI:106956	MGI:705099	AGGGGTTGGTTACCACACAA	TACTTTCTCCCTAAAACTCTGTGTG				isPCR	unmapped	15	20	D15Mit268
D15Mit273	D15Mit273		MGI:108711	MGI:1347793	TGGAGGGCTGACATTGGT	GGTCCTCATCAGTTGGTTTCA				isPCR	unmapped	15	syntenic	D15Mit273
D15Mit30	D15Mit30		MGI:90311	MGI:701069	CCCCCTGATGAACGGG	TTGGACAGTGCCTTCTTGG				isPcr	unmapped	15	44.9	D15Mit30
D15Mit32	D15Mit32		MGI:90313	MGI:701071	TGGATGTCAGTCAAGCAAGC	ATGTGGCCCTACTTAGCCCT				isPCR	unmapped	15	48.2	D15Mit32
D15Mit48	D15Mit48		MGI:90328	MGI:706052	AAGCTAATGTAAACTCCTTGAGCA	CCCTTTTCAGCCTTAGTCCC				isPCR	unmapped	15	60	D15Mit48
D15Mit66	D15Mit66		MGI:90348	MGI:702470	TACACTCATTCATCTGGAAGAGTC	TGGGTGCAGATTGAGATGAG				isPCR	unmapped	15	32.2	D15Mit66
D15Mit8	D15Mit8.2		MGI:90363	MGI:704170	CACACTTGTTAATGCATTTGGG	AAAAGGGGGAGGAAGAATTGTAG				isPCR	unmapped	15	19.7	D15Mit8
D15Mit8	D15Mit8		MGI:90363	MGI:707740	GGAAAAGGGAAAAAGATGTGC	TATATTACACTTTCCTTTGCTGCA				isPCR	unmapped	15	19.7	D15Mit8
D15Mit83	D15Mit83		MGI:90367	MGI:707258	AAAAGATCTCTGGCTTCCATAGC	ATTCAAGACCACGCTTGGAC				isPcr	unmapped	15	21.1	D15Mit83
D15Mit96	D15Mit96		MGI:90381	MGI:705430	TGGCACTCTCTGACAACTAAGTG	ATGGTCCAGGAAGGACCTCT				isPCR	unmapped	15	48.9	D15Mit96
D16Mit1000	D2Mit169.2		MGI:92031	MGI:702109	CATTTTTGGAGACAGGGTCTCT	CTAGCCTTCACAAGGTTCAAAGGT				isPcr	unmapped	16	syntenic	D16Mit1000
D16Mit113	D16Mit113		MGI:90470	MGI:702072	CAAGTAACATGATGTGAATTGTACAG	TTCCTTTCATCCCATTTATTCC				isPCR	unmapped	16	34	D16Mit113
D16Mit114	D16Mit114		MGI:90471	MGI:702073	TTTTTTACCGTATTATCTTCATGGC	GATATGGATGGAGAAAAATTGTATTT				isPCR	unmapped	16	44.5	D16Mit114
D16Mit119	D16Mit119		MGI:90476	MGI:702078	ACTGTGCAAAGTTGTAGGTGACA	TTAACAGTGGGTGGGCTTTC				isPcr	unmapped	16	67.7	D16Mit119
D16Mit123	D16Mit123		MGI:90481	MGI:707474	TTGCAAAAAGTCGAGGGC	ACTCAAGAAGACAATGTCTTTCACA				isPCR	unmapped	16	20.2	D16Mit123
D16Mit13	D16Mit13		MGI:90487	MGI:703892	TTAGAACTCAGTAAGCTCTC	CTTAAACAGGCACNAATCCCATT				isPcr	unmapped	16	27.6	D16Mit13
D16Mit134.2	D16Mit134.2		MGI:3623331	MGI:705278	TGATGTCTATGTGGTGGTCAAAG	AAGCAGTTAAAGTTCACTTGCCC				isPCR	unmapped	16	syntenic	D16Mit134.2
D16Mit145	D16Mit145	D16Mit145	MGI:100936	MGI:704307	GGGATCTTATACCCCAAGTGG	AAAACGCCATACAGAAACATCC				isPCR	unmapped	16	13.6	D16Mit145
D16Mit15	D16Mit15		MGI:90489	MGI:703898	TTCCATTCATATACCTGCAAGTG	CTGAAGCTGTTAAATGCTGCC				isPCR	unmapped	16	33.8	D16Mit15
D16Mit150	D16Mit150		MGI:100931	MGI:702511	GAATGTTGGATCAAAAAGATAGATACT	TTCCTACGCTTTGGCTCAGT				isPcr	unmapped	16	43	D16Mit150
D16Mit151	D16Mit151		MGI:100930	MGI:702512	TTCTGTGCCTTAGTGATTGGG	GTGATCATTCTTCATAAGTTACACACA				isPCR	unmapped	16	45.5	D16Mit151
D16Mit174	D16Mit174		MGI:100907	MGI:707695	TTCTTGAGAATTTCCATAGTTCTCC	GCCCCCTCTCTCTGTATATGT				isPCR	unmapped	16	43	D16Mit174
D16Mit194	D16Mit194		MGI:102393	MGI:702961	CAAATAAATGGTTCTTTAGAGGGG	ATTACTTGAGAGCACAGAATGGC				isPCR	unmapped	16	28.3	D16Mit194
D16Mit201	D16Mit201		MGI:102399	MGI:706713	CGATCCCCAATACACATATGC	TCAGGAAGAAGCGACATGC				isPCR	unmapped	16	41.2	D16Mit201
D16Mit209	D16Mit209		MGI:105875	MGI:705828	TCCCCCGATTTCTTTCTCTT	ACCCCAAAATCCCTCTTCAG				isPCR	unmapped	16	14	D16Mit209
D16Mit212	D16Mit212		MGI:105878	MGI:707641	AGCCCTAAATGAATGCACTTG	AGACTCTCACCTATACTCACAGAGACA				isPCR	unmapped	16	27.3	D16Mit212
D16Mit218	D16Mit218		MGI:105884	MGI:707649	ATAGCACCAAGGTTAGACTTC	CTGTGAATGTGTGTGTATGTAT				isPcr	unmapped	16	67.45	D16Mit218
D16Mit55	D16Mit55		MGI:90526	MGI:703511	TATGCGTTTAGTAATGATTTCCTACG	TGTAAGGACATATCTACCTTATCACCC				isPCR	unmapped	16	3.4	D16Mit55
D16Mit6	D16Mit6		MGI:90531	MGI:704218	CAGGTCCAAGAGGAGAACCA	TTTGACCTGTGAGCCTGTGG				isPcr	unmapped	16	63.2	D16Mit6
D16Mit72	D16Mit72		MGI:90545	MGI:707076	AGTCCCAAGGTTGTCCCTCT	GAAGAGTTGCAAAGAAATTGCC				isPcr	unmapped	16	8	D16Mit72
D16Mit9	D16Mit9		MGI:90564	MGI:701077	TCTTGCTCTGGTATCAACTACAGG	CCTCCTTGCCCAGCTAAAC				isPCR	unmapped	16	4	D16Mit9
D16Mit95	D16Mit95		MGI:90570	MGI:704704	CCTGTAACTCCTGGGAATTTG	CACGGAACCACTGGGTTTAT				isPCR	unmapped	16	69.7	D16Mit95
D17Mit1	D17Mit1		MGI:90737	MGI:704225	TGCTTGAAATCCTGGGTTCA	TGCAAAAATGTATGTGCCTG				isPcr	unmapped	17	56.7	D17Mit1
D17Mit10	D17Mit10		MGI:90738	MGI:704995	TGCACTTGCATAAGGAAAAC	GACTTTGGGGCCTACTTATG				isPcr	unmapped	17	24.5	D17Mit10
D17Mit11	D17Mit11		MGI:90749	MGI:704994	TGAATTTATGAGGGGGGTCA	TGTCCCATATCTCTCTTTATACACA				isPCR	unmapped	17	22.8	D17Mit11
D17Mit112	D17Mit112		MGI:90752	MGI:702947	CATGCTTTCTCTCTCCCCC	AGAGTTGCCTTAAGTGTTGAAGTATG				isPCR	unmapped	17	7.1	D17Mit112
D17Mit134	D17Mit134		MGI:90775	MGI:706908	GGGCTAAAGATCTAATGTAGTTGAGC	CACTGGGTGGTTAAAAGAAACC				isPCR	unmapped	17	16.9	D17Mit134
D17Mit135	D17Mit135		MGI:90776	MGI:706907	CATAGATCAGATAGTCGCACGC	TCTCAGGAAGGCAGGACAGT				isPCR	unmapped	17	17	D17Mit135
D17Mit165	D17Mit165		MGI:100887	MGI:705496	ACTTTAGATGATTGCAATATTTGTGT	TCACCTTTTATCTTCTATATGCATGC				isPCR	unmapped	17	9.32	D17Mit165
D17Mit166	D17Mit166		MGI:100886	MGI:1347868	ACGCACTGTGGGACAATGTA	CTCACCAGCCCTTTTACTAGATT				isPCR	unmapped	17	syntenic	D17Mit166
D17Mit171	D17Mit171		MGI:100881	MGI:707305	TTGGTATCTGCACTCAACTTGA	TTATTTCATTTACTCGTGTGTGGG				isPCR	unmapped	17	5	D17Mit171
D17Mit175	D17Mit175		MGI:100877	MGI:707309	TGGAAATCGGAGCCTCTG	TTGGAAAAGGTTGAGAGTAGATCA				isPCR	unmapped	17	17.7	D17Mit175
D17Mit18	D17Mit18		MGI:90805	MGI:704990	GCAGCTCATTCTTAGTCCCTAAT	TCATGAGTCCCCAAACTAGC				isPcr	unmapped	17	4	D17Mit18
D17Mit2	D17Mit2		MGI:90807	MGI:704227	ACAAACATGTTGGCCTAATTCC	TTGAGTTTAAGCCCCTAGAATCC				isPCR	unmapped	17	49.7	D17Mit2
D17Mit210	D17Mit210		MGI:100842	MGI:702479	ATGTGGTCAATTTATTTACTTGTGTG	CCTGTCTGTGTCCCTGTCTC				isPCR	unmapped	17	53.3	D17Mit210
D17Mit214	D17Mit214		MGI:100838	MGI:702492	GCAAAGAAGAAAAACTAGACTCAGTG	ACACTTTCAGAAATTCATGGCA				isPCR	unmapped	17	18.7	D17Mit214
D17Mit220	D17Mit220		MGI:100832	MGI:706545	GGCACAGAGTCTATGTGCATG	TTTCCAAGGTCAATATTTTATTTCG				isPCR	unmapped	17	45.3	D17Mit220
D17Mit222b	D17Mit222	D17Mit222a	MGI:3641591	MGI:706543	TGGAAGAGGGAACCTCTAGTAGG	GAGGGAGATAGAGGAAGGAAGG				isPCR	unmapped	17	syntenic	D17Mit222b
D17Mit228	D17Mit228		MGI:102411	MGI:706548	CGTTTGCCTGACAGTGTCC	GAATGTTCCAGAGACTGCTGC				isPCR	unmapped	17	16.4	D17Mit228
D17Mit230	D17Mit230		MGI:102412	MGI:704757	TAACCCTCTGGCTTCCCC	AAAATCAAACCCAAGAAGAGTCA				isPCR	unmapped	17	18.18	D17Mit230
D17Mit238	D17Mit238		MGI:102421	MGI:704753	TACTCCTTCCTCAACACAATACTAATT	AATGTGCTCATGCATACATGC				isPCR	unmapped	17	34.3	D17Mit238
D17Mit241	D17Mit241		MGI:102423	MGI:702984	TTTCAAATTCATAGCCTCTTTTTC	TACAGAATGAGCAGGTTGTATTAAGG				isPCR	unmapped	17	45.3	D17Mit241
D17Mit248	D17Mit248		MGI:105417	MGI:702979	GTCAGGCTTCTTTGGTTTTCC	GCATCCTACAATTCCTTTGAGG				isPCR	unmapped	17	16	D17Mit248
D17Mit251	D17Mit251		MGI:105414	MGI:701163	CCTGAGGTGGGAGAACTCAG	GACACAAATGCTCAGTCCTTACA				isPCR	unmapped	17	31	D17Mit251
D17Mit254	D17Mit254		MGI:105411	MGI:701158	GTAACAATGAAACGAAACAAAAACA	TTAGCAAGGGCTTAAGAGAACC				isPCR	unmapped	17	37.7	D17Mit254
D17Mit261	D17Mit261		MGI:106968	MGI:706931	CCCTTGCTCTCCTTCATTCA	AATGCCCAAATGGTCAGC				isPCR	unmapped	17	10	D17Mit261
D17Mit266	D17Mit266		MGI:108730	MGI:706934	GCAGGTATACGCTCAGTCATATATG	AGACATACAGTACTGACCACTGGC				isPcr	unmapped	17	syntenic	D17Mit266
D17Mit274	D17Mit274		MGI:705126	MGI:705127	ACTCCTTNGGGACCTGCATT	ACCGCTCAGGGAGTGCACTT				isPcr	unmapped	17	33.5	D17Mit274
D17Mit43	D17Mit43		MGI:90832	MGI:707198	CATTGTGAATATGTGAACATGGG	CAGTTCTGGTTTAAAGCTTGGG				isPcr	unmapped	17	11	D17Mit43
D17Mit44	D17Mit44		MGI:90833	MGI:707202	TGGAAGCAGACAGAGGTGG	GAAGAGGTGCAGCAGAAACC				isPCR	unmapped	17	15	D17Mit44
D17Mit45	D17Mit45		MGI:90834	MGI:707203	GTTGGGACTATGAGGCAAATG	CATGCATGTACAATGACACAGTG				isPCR	unmapped	17	16.4	D17Mit45
D17Mit60	D17Mit60		MGI:90851	MGI:703213	ACCAGAGGCAGGTCTGAAGA	CCTGTAATCAAAGGAAAGGCC				isPCR	unmapped	17	16.8	D17Mit60
D17Mit69	D17Mit69		MGI:90860	MGI:703207	ATCTGGGACAGAGATACCAACTG	ATACATATGCAGCTGAGCCTAGC				isPcr	unmapped	17	31	D17Mit69
D17Mit79	D17Mit79		MGI:90870	MGI:701404	TGGTCAGGCAGTGTGGTAAA	CCTGTCCCTTTTGTTTTAAGACG				isPCR	unmapped	17	10	D17Mit79
D17Mit95	D17Mit95		MGI:90888	MGI:704159	TTATCAGTGAGTCTAGGGACAGAGA	ATACTGAGTAACTCACCAGGAGACC				isPcr	unmapped	17	51.9	D17Mit95
D18Mit10	D18Mit10.2		MGI:91017	MGI:706686	CGAGTAATAAGGCTCATCTCCAA	AGGTCGACTCTAGGGATCTTCAT				isPCR	unmapped	18	26	D18Mit10
D18Mit118	D18Mit118		MGI:91036	MGI:703448	ACAGTGAGTTCCACTACAAGATGC	TATGATGCGCTCTGCAGG				isPCR	unmapped	18	16	D18Mit118
D18Mit124	D18Mit124		MGI:91043	MGI:701612	CCCAAATGGGGTGTCTTTTA	CTGCCACACATTTGTGTGTATG				isPCR	unmapped	18	32	D18Mit124
D18Mit134	D18Mit134		MGI:91053	MGI:707409	GGCCAACTAAGGCACACAAT	ATCTATAAACCATCAAGATTCTGTGTG				isPCR	unmapped	18	16	D18Mit134
D18Mit16	D18Mit16.1		MGI:91067	MGI:705323	CCCAACTGAAGCTCCTTTCTCT	TTAAGCACAGTCTCCAAAGGGA				isPCR	unmapped	18	58	D18Mit16
D18Mit161	D18Mit161		MGI:100815	MGI:701238	TGACCAGCGTTTGATGGAT	TTCCACAAGTTGTCAACTCCC				isPCR	unmapped	18	37	D18Mit161
D18Mit165	D18Mit165		MGI:100811	MGI:703488	CTCTTCCCTCCACCTAGGCT	CAACCCCCAGAACCCCTC				isPcr	unmapped	18	2	D18Mit165
D18Mit166	D18Mit166		MGI:100810	MGI:700335	ACACCATTTTAACAACTTTAAACATTC	ACCCCATACTCTCACATGTATGC				isPCR	unmapped	18	2	D18Mit166
D18Mit176	D18Mit176		MGI:100800	MGI:707004	AGGATCCCCCCACTTCATAT	TTCTTCTCACTGTAATGCCAGTG				isPcr	unmapped	18	16	D18Mit176
D18Mit188	D18Mit188		MGI:100788	MGI:707419	TGCAAAATGATGTCTTCCCA	TATTTACCCACAGGTTAAATGAAGG				isPCR	unmapped	18	47	D18Mit188
D18Mit189	D18Mit189		MGI:100787	MGI:707417	ACACAGTTCAGGGAGTGAATACA	TAGTTTGCTCGTCTTGTGTATGC				isPCR	unmapped	18	48	D18Mit189
D18Mit199	D18Mit199		MGI:102429	MGI:1347916	CAGGAAATACCAACAAGAAATAATACA	TGAGCAAAAAAAGTGAAAAGTCA				isPCR	unmapped	18	11	D18Mit199
D18Mit208	D18Mit208		MGI:102437	MGI:701493	GACACATTTATGAGTCAGTCAGCC	TGTGAACCCAGGTCATGTGT				isPCR	unmapped	18	38	D18Mit208
D18Mit211	D18Mit211		MGI:102441	MGI:703312	CCAAACTTGCAGCAAGCAC	TAGCCTTAGATTCTTCTCCAATATTT				isPCR	unmapped	18	47	D18Mit211
D18Mit213	D18Mit213		MGI:102445	MGI:703314	ATGTTATCCTCTGGCTCCATATG	ATCCAGTTTCTTTTAAAATTATTTCCC				isPCR	unmapped	18	55	D18Mit213
D18Mit225	D18Mit225		MGI:105398	MGI:705473	AGGACAAATAAATAAAAAGAGTGTGTG	CTTCCATATTGCTGTAACTTAAATGG				isPCR	unmapped	18	16	D18Mit225
D18Mit230	D18Mit230		MGI:106973	MGI:707288	GTCCTTCAAATCTCTCTGGGG	TGTTATACAGAGTGAGTAGGCTGTG				isPCR	unmapped	18	8	D18Mit230
D18Mit234	D18Mit234		MGI:106977	MGI:707292	GGACTGTAGTCTGCAAGTACATGC	AGAGTCATAGAACTTATGGAGTGTGTG				isPCR	unmapped	18	16	D18Mit234
D18Mit240	D18Mit240		MGI:108746	MGI:1347941	TCAACCATAACACAGTAGAAACACA	GGGATGAAGATTTGAAGTGTCC				isPCR	unmapped	18	syntenic	D18Mit240
D18Mit28	D18Mit28		MGI:91079	MGI:702449	TCTGCAATGAGACAACCACTG	TTTCCCAACATAAAAAAGCTCC				isPCR	unmapped	18	35	D18Mit28
D18Mit34	D18Mit34		MGI:91086	MGI:707147	CACTGGATGACACAGCCTGT	GATGTTTCCTTGGGTTTGTCA				isPCR	unmapped	18	12	D18Mit34
D18Mit48	D18Mit48		MGI:91101	MGI:705844	TTGCACTCACAGGGCACAT	TCAGAGTTTCCAGAAGACACCA				isPCR	unmapped	18	50	D18Mit48
D18Mit5	D18Mit5		MGI:91103	MGI:706795	TTGTCCACTGATTGCCACAT	CGTATACCCCCACCATGTTC				isPcr	unmapped	18	54	D18Mit5
D18Mit61	D18Mit61		MGI:91116	MGI:702259	TCCTTTTGAAAAAACTGATAGCG	TTGTAAAGAACCAAACAACACACA				isPcr	unmapped	18	16	D18Mit61
D19Mit10	D19Mit10		MGI:91216	MGI:703131	GCCTTTAAGCCAGTCAAGACA	CCAGTCTGGACTTGTGAATGA				isPCR	unmapped	19	47	D19Mit10
D19Mit2	D19Mit2		MGI:91228	MGI:700607	TGTTGATAGTGCAAGGTGCG	CAAGGGGCCATACCTAGTGA				isPcr	unmapped	19	51	D19Mit2
D19Mit20	D19Mit20		MGI:91229	MGI:701329	AAGCAGGGGTGTGTCAGC	CTTGTCACCCTCTCCAGAGC				isPCR	unmapped	19	26	D19Mit20
D19Mit38	D19Mit38		MGI:91248	MGI:707109	TGCTTTGCTGTTTTGTTTGC	TCCCTCCCTTTCACTCCAC				isPcr	unmapped	19	47	D19Mit38
D19Mit43	D19Mit43		MGI:91254	MGI:705299	TTTGGTTTTTCGAGACAGGG	ATTGCAGGTTACCCCAATCA				isPcr	unmapped	19	0.5	D19Mit43
D19Mit47	D19Mit47		MGI:91258	MGI:705295	TTTTATTCCAAAAGTTCCTGTTTC	TCTCTTATAGTATCCCTTGCCCC				isPCR	unmapped	19	29	D19Mit47
D19Mit50	D19Mit50		MGI:91262	MGI:703539	GCTTCGAGCTCCAGCTTCTA	TGTTCACATGCCACCTGTCT				isPCR	unmapped	19	53	D19Mit50
D19Mit50	D19Mit50.1		MGI:91262	MGI:707428	AGAGAACAGGTAAGCAAGGCTCT	GTTTGAGTCAGGATTCCAATGAG				isPCR	unmapped	19	53	D19Mit50
D19Mit6	D19Mit6		MGI:91272	MGI:700603	ATTAGTAAACTGACTCCCATGCG	CTCATGAGTCCCCTGGGTTA				isPCR	unmapped	19	55	D19Mit6
D19Mit8	D19Mit8		MGI:91291	MGI:700610	CTGTCCAGCCTTTAAGCCAG	CTAACTGCTTTGGCTCCTGG				isPCR	unmapped	19	47	D19Mit8
D19Mit89	D19Mit89		MGI:100758	MGI:705756	GCCCCGCTATTATAAATGCA	AGTATTTAGGGGAACACTAGTGTGTG				isPcr	unmapped	19	41	D19Mit89
D19Mit90	D19Mit90		MGI:100757	MGI:703987	GTGGGAATCAATTTTAGTATGAACA	GGATGCTTGATATCATGTACATACA				isPCR	unmapped	19	41	D19Mit90
D1Mit1011	D16Mit18.1		MGI:3619995	MGI:701398	AATTAGATGAAGCTCTTCAGGGG	CTTACCTTTTGCTCTCCTTCTCC				isPCR	unmapped	1	syntenic	D1Mit1011
D1Mit1014	D9Mit333		MGI:105765	MGI:702856	ATGTGCGTGTGTGTATGTATGTATG	TCATATATTTCATGGACTTGCACC				isPCR	unmapped	1	syntenic	D1Mit1014
D1Mit1016	D7Mit252		MGI:100261	MGI:704900	AGAAATAACATTAGAAATCCCCTGC	TCAAGGGAACACACCCACCT				isPcr	unmapped	1	syntenic	D1Mit1016
D1Mit111	D1Mit111		MGI:91481	MGI:700875	ATTGCCTGACTCCAGTATTCTACC	TTAGGTGTGTGAAAGACATTCCC				isPCR	unmapped	1	92.3	D1Mit111
D1Mit117	D1Mit117		MGI:91487	MGI:700873	CAAAACAAAACACGCAGAGG	CTCACTGCAGAGTTTGAGAAATG				isPCR	unmapped	1	106.1	D1Mit117
D1Mit12	D1Mit12		MGI:91490	MGI:704964	ACCATATCTCTACATGCTTGTGC	GCATTTGGTTTATTTTTCCACG				isPCR	unmapped	1	63.1	D1Mit12
D1Mit128	D1Mit128		MGI:91499	MGI:706254	TGGGTCACCTGCACTTATCT	AGTGCTAGATTTAAAGGGACATGC				isPcr	unmapped	1	36.9	D1Mit128
D1Mit13	D1Mit13		MGI:91501	MGI:704963	TGATGCTTGCACGTTGAGAT	AAAACTGGTTCCTGGTTCCC				isPCR	unmapped	1	63.1	D1Mit13
D1Mit148	D1Mit148		MGI:91521	MGI:702249	GCTTAGTGAAAGTCAGGCGG	ATATGTCCTTAGAATTTCCCTCATG				isPCR	unmapped	1	92.3	D1Mit148
D1Mit159.1	D1Mit159.1		MGI:3613944	MGI:707318	CCAGGGGAGTGACATTCATAATA	GAGATTTCGATGAAGAGAGGGAT				isPcr	unmapped	1	syntenic	D1Mit159.1
D1Mit166	D1Mit166		MGI:91541	MGI:705825	GATGAAGTGAAAATGATCCTTGC	TATCTTTTGTGGACTCGGGG				isPCR	unmapped	1	100	D1Mit166
D1Mit182	D1Mit182		MGI:91559	MGI:705523	GGAAGACCGAACCAAGTCCT	AACACAAAACCAAAACCAAACC				isPcr	unmapped	1	52.6	D1Mit182
D1Mit2	D1Mit2.2		MGI:91577	MGI:700226	ATGTGTGAGCAGTGCCTGTG	TCGCATAACTCGAGGGTGATA				isPCR	unmapped	1	9	D1Mit2
D1Mit210	D1Mit210		MGI:91590	MGI:704424	CACATGTCTGCAATGGGTATG	ACAAATACCCCACTATTACATTTGC				isPCR	unmapped	1	109	D1Mit210
D1Mit224	D1Mit224		MGI:91605	MGI:704949	AGTAGATGAAGGGGGGCAAT	AATATAATAATGGGTTTCATAAGTGGC				isPcr	unmapped	1	107.3	D1Mit224
D1Mit261	D1Mit261		MGI:91646	MGI:705582	TGAAGGTACTGTGGCTCCCT	TCATGCATGTGCATACTCACA				isPCR	unmapped	1	63.1	D1Mit261
D1Mit271	D1Mit271		MGI:91657	MGI:707135	AGAGACATTCATTCCGATTAAAGG	GATTGGGATCCACCTCCTG				isPCR	unmapped	1	100	D1Mit271
D1Mit273S	D1Mit273S		MGI:107011	MGI:700743	TACAGGCATGTGATGCTATTGAC	AATAGTCTTGGGGGTGAAGAACT				isPcr	unmapped	1	102.5	D1Mit273S
D1Mit278	D1Mit278		MGI:91664	MGI:707140	TACGGCCCTAGCCTTGCTTA	TGACATCTGCTTCTTGCACC				isPCR	unmapped	1	19.5	D1Mit278
D1Mit29	D1Mit29		MGI:91677	MGI:706777	CTCTATTGGGTTTCAGACCTGG	CAGTGGAAAACAGAGGGGAA				isPCR	unmapped	1	67	D1Mit29
D1Mit31	D1Mit31		MGI:91684	MGI:700989	GCACGAGCACATAAGACGAA	GAAGGCTCAGAGGCAGGAC				isPCR	unmapped	1	69.9	D1Mit31
D1Mit31.2	D1Mit31.2		MGI:3613963	MGI:703098	GGGCCTGTAACCCTCTGCTA	CCTTTGACTCTTCCTGATCCGTAG				isPcr	unmapped	1	syntenic	D1Mit31.2
D1Mit312S	D1Mit312S		MGI:107016	MGI:705732	ACTCCAGAAGAGGGCATGAA	TAAAGAGGGATTAAGACCACACAC				isPCR	unmapped	1	70	D1Mit312S
D1Mit321	D1Mit321		MGI:101445	MGI:704059	CAGTTGTGACTGTTTAGGGATCC	TTTTCTAAGGAGCCCTACAGACA				isPCR	unmapped	1	21	D1Mit321
D1Mit322	D1Mit322		MGI:101444	MGI:704056	CAAATTTACACCCATGTTGTGG	TCAATGGAGGGGAAGATCAG				isPCR	unmapped	1	23.6	D1Mit322
D1Mit334	D1Mit334		MGI:101432	MGI:702269	CAAGAGATGAAAAAAAAAAATCAGC	CAGATGCAAAACCCCATTTT				isPCR	unmapped	1	49.7	D1Mit334
D1Mit34	D1Mit34		MGI:91686	MGI:700986	CACGAAAATCCCTTCCTCAA	CCCTGCCATGTACCTACATACA				isPCR	unmapped	1	81.6	D1Mit34
D1Mit343	D1Mit343		MGI:101423	MGI:701228	ACATGGGTCTACATGAGTACATGC	CAAATGCTTTGTTTACACTGGG				isPCR	unmapped	1	63.8	D1Mit343
D1Mit347	D1Mit347		MGI:101419	MGI:700463	GCTGGGAACAAACTTAGGTCC	CCATTTTAGCAGGTACAAATTAAAA				isPcr	unmapped	1	73	D1Mit347
D1Mit350	D1Mit350		MGI:101416	MGI:704636	GGTCACAACTGGTTATAAATGAATATG	ATTACAGTGTTGTTCTTACCAAGGG				isPCR	unmapped	1	81.6	D1Mit350
D1Mit352	D1Mit352		MGI:101414	MGI:706263	AAAAGGCCAGAAATGTATGAATG	TGACACCTTCCTCCTGGC				isPCR	unmapped	1	87.8	D1Mit352
D1Mit374	D1Mit374		MGI:101392	MGI:701681	ACTACTCTTTCTCACAGTTGTCTCTCC	ATCCACATGCATAAAGCGTG				isPCR	unmapped	1	19	D1Mit374
D1Mit376.1	D1Mit376.1		MGI:3613967	MGI:707631	GGGTTCATGCAAAGGAGATG	AGTTAAAAGTGTCCCTGCAAAACAC				isPcr	unmapped	1	syntenic	D1Mit376.1
D1Mit388	D1Mit388		MGI:101378	MGI:702831	AAGATGTCAGATGAAGCAAGTCC	GATGATTAAAGGTAATCCCAGCC				isPCR	unmapped	1	62.9	D1Mit388
D1Mit406			MGI:101360	MGI:703796	GAACTTGGAAACAAATATGAATTATCC	TGCAAGAGAGTAAGTTTTACTTACACA				isPcr	unmapped	1	101.2	D1Mit406
D1Mit412	D1Mit412.1		MGI:101354	MGI:705540	TGATGCCTGAGGTTCGACTCTA	AGTACACATGATTGTGGAGATCTG				isPCR	unmapped	1	19.5	D1Mit412
D1Mit418	D1Mit418		MGI:101348	MGI:705574	AAGGTGGTCAGGATGTGAGG	CTGATGGAAATGAAATATACTAATTGC				isPCR	unmapped	1	63.1	D1Mit418
D1Mit421	D1Mit421		MGI:101345	MGI:700220	GACTGTGATGAGTTCTTATATAACCCC	TGTCTGCAAAAGTGTGTGTGA				isPCR	unmapped	1	64	D1Mit421
D1Mit426	D1Mit426		MGI:101340	MGI:700219	CTGCCATCCACTACTTGGTG	CAAATGATACAGTGGAAACCCC				isPCR	unmapped	1	101	D1Mit426
D1Mit435	D1Mit435		MGI:101964	MGI:701976	CAATACAATCCATACAAAGAGACACA	ATCCTCTCAAATCACTATCAACAGC				isPCR	unmapped	1	36.9	D1Mit435
D1Mit438	D1Mit438		MGI:101968	MGI:707358	CAAGAATTTTAGAGGATCAAACACA	ACAAAAGTTTCTTTCTCTCCATCTC				isPCR	unmapped	1	51.8	D1Mit438
D1Mit441	D1Mit441		MGI:101970	MGI:705383	GACAGGAACTAACCAACTCTAGGG	ACTTGAGAGTACAAGCACACGC				isPCR	unmapped	1	62.1	D1Mit441
D1Mit442	D1Mit442		MGI:101972	MGI:705382	GAAGAGTGTGAGGCCACATATT	ACATGCACAGTAATCTATATGACAGTT				isPCR	unmapped	1	63.1	D1Mit442
D1Mit446	D1Mit446		MGI:101975	MGI:703401	TGAGTATATCATGAAGACAGCAACC	ACGTATTTACCTTGTTCTGAATTTTG				isPcr	unmapped	1	70	D1Mit446
D1Mit457	D1Mit457		MGI:101986	MGI:704653	ACCTATTAGTGACTCTTTAACAGGCA	TGTTTTTTCCCCATCTCCAA				isPCR	unmapped	1	100	D1Mit457
D1Mit460	D1Mit460		MGI:101990	MGI:707381	CCCCATCTCTTATTTACATGTGC	TATCAAACATGCACTACACACTGG				isPCR	unmapped	1	102	D1Mit460
D1Mit462.2	D1Mit462.2		MGI:3613971	MGI:701426	GGTGCAAGGCTTGACACTGA	TTTCATTTGCTACTGGGTGTTG				isPcr	unmapped	1	syntenic	D1Mit462.2
D1Mit474	D1Mit474		MGI:105620	MGI:701574	GAATGGTCCAACTTGGATTCC	AGCAGAAACCTATATCCTATACACACA				isPCR	unmapped	1	8.4	D1Mit474
D1Mit496	D1Mit496		MGI:105642	MGI:706412	ATTTAGATTCACGCGCGC	ATCGATCAAAAATAAGGCATTTG				isPCR	unmapped	1	70	D1Mit496
D1Mit497	D1Mit497		MGI:105643	MGI:706413	AGAGAAACCCTGTCTCGCAA	TTAAATGCCTTAACCCTAAAGCC				isPCR	unmapped	1	71.5	D1Mit497
D1Mit50	D1Mit50		MGI:91700	MGI:705413	GGGTAATAACTGCATTCTTGCC	TAGGCTCAAAGAGGCCTGAA				isPcr	unmapped	1	53	D1Mit50
D1Mit505	D1Mit505		MGI:105651	MGI:702535	GCAGTTCCTCTCACAGAATGG	TCTTTGGAATTATTTTTTTCTGGA				isPCR	unmapped	1	85	D1Mit505
D1Mit516	D1Mit516		MGI:108808	MGI:1347802	AGGTAAGAAGCTATTTGCAGCG	ACTATGTACTACTCCCTGCTTGCC				isPCR	unmapped	1	syntenic	D1Mit516
D1Mit534	D1Mit534		MGI:107044	MGI:1347846	ACAGAGTAGAGCCAACACA	GGCATTCAGTAGTCATTTAACT				isPCR	unmapped	1	58.7	D1Mit534
D1Mit535	D1Mit535		MGI:107045	MGI:704330	CTTTTTTCCCCCACACTCTG	AGAGTATACTGAGACACTTTGCCC				isPCR	unmapped	1	63.1	D1Mit535
D1Mit536	D1Mit536		MGI:107046	MGI:704329	CCAGCAGTGGATGATAAGAATG	GGTGACAGGCTTCACTGTGA				isPCR	unmapped	1	67	D1Mit536
D1Mit543	D1Mit543		MGI:107054	MGI:702924	CATCAAGGTTGTTGTGGTGG	TGATTGAATCTTGATGTTCTCTGC				isPCR	unmapped	1	102	D1Mit543
D1Mit56	D1Mit56		MGI:91706	MGI:1347905	GCCTTATTCATGGTACTCAGTGC	TGTGTTCTACCCTCCTCTCACA				isPCR	unmapped	1	106.1	D1Mit56
D1Mit8	D1Mit8		MGI:91731	MGI:705182	CTGAAAATCGTCCCTTGACC	CAGGAGCATGAAATGGGGAT				isPCR	unmapped	1	52	D1Mit8
D1Mit80	D1Mit80		MGI:91732	MGI:704032	CATAGACAAGTCTCTGAACCATGG	ACTACATAGCCAATAGCCCTGG				isPcr	unmapped	1	52	D1Mit80
D1Mit97	D1Mit97		MGI:91750	MGI:706726	AATGCAACCCTACACCTCATG	GATGTAAAAGGCTGACCTTTGG				isPcr	unmapped	1	65	D1Mit97
D1Mit99	D1Mit99		MGI:91752	MGI:705814	CAAGGTAGAAGGAGAACTGACTCC	TCTGGCCTGGAGGAGTATTG				isPCR	unmapped	1	67	D1Mit99
D2Mit13	D2Mit13		MGI:91988	MGI:704837	AGGACCAGAAGGACAGACCTATC	AAATCTCACAGGGAAAAAAAAGC				isPCR	unmapped	2	47.5	D2Mit13
D2Mit131	D2Mit131		MGI:91990	MGI:700795	GCAAATCCTAGCTGATTTAGGTT	CTTTCTTGTTTGAAGCGCTC				isPcr	unmapped	2	50.3	D2Mit131
D2Mit133	D2Mit133		MGI:91992	MGI:700797	CTCATAACCCCCCACTCTCT	TAGCAAAATAACTTAGGCGGC				isPCR	unmapped	2	66.8	D2Mit133
D2Mit143	D2Mit143		MGI:92003	MGI:703388	ACATTAGAAGGAAATGAAAACATGC	CCCTTTTACTTCCCCATGCT				isPCR	unmapped	2	91.9	D2Mit143
D2Mit167	D2Mit167.2		MGI:92029	MGI:703527	CCAATGTGACCAGGGAATGT	AACTTGGGTGCAAGCTTTAGATG				isPCR	unmapped	2	79.7	D2Mit167
D2Mit17	D2Mit17		MGI:92032	MGI:704833	AGGCAATTACAAGGCCTGG	CACCCATCTCCCTCAGTCAT				isPCR	unmapped	2	69	D2Mit17
D2Mit173.1	D2Mit173.1		MGI:3613984	MGI:700833	GGTGGTACATCTTTTAATCCCA	GACCTTTGAGATTTTTGTAGTCCTGG				isPcr	unmapped	2	syntenic	D2Mit173.1
D2Mit174	D2Mit174		MGI:92037	MGI:701180	TCCTCATTTTATATTTTGCCTTAGTT	CCTTTTCCTGTAATAGTTATGTGGG				isPCR	unmapped	2	105	D2Mit174
D2Mit175	D2Mit175		MGI:92038	MGI:701181	ATGACAAACAAGAAATAGGAAGGC	CATGTGCTTGAGCATGCAC				isPcr	unmapped	2	2	D2Mit175
D2Mit189.2	D2Mit189.2		MGI:3613985	MGI:704209	GATGTCCTGAACACCAGCGT	CCCCCAGTTTAATAGGAGGG				isPcr	unmapped	2	syntenic	D2Mit189.2
D2Mit19.2	D2Mit19.2		MGI:3613987	MGI:700852	TTCTAAGCCAGGCTTTTGAAAGAC	AAACCCGGAAAACTTTAAGG				isPcr	unmapped	2	syntenic	D2Mit19.2
D2Mit190	D2Mit190		MGI:92054	MGI:705558	AAGTATTTTCTGCATTTTAAGTGTGTG	GTATTTCATGTACAATTGAAAATGCC				isPCR	unmapped	2	67.5	D2Mit190
D2Mit201	D2Mit201		MGI:92066	MGI:704318	ATGGGAGTTGAGTCTATGGTAGTACC	AAATTTGGAATTTGGATGAATG				isPCR	unmapped	2	5	D2Mit201
D2Mit215	D2Mit215		MGI:92081	MGI:702515	TTTTCTTTGATGATGATGATGATG	GCCTCTTGTCAATATACAATGTGC				isPCR	unmapped	2	4	D2Mit215
D2Mit218	D2Mit218		MGI:92084	MGI:702514	GGTTAGAGGAATTCTGCCACC	ACCCAAAGTTGTCTTTAAGTACACA				isPCR	unmapped	2	32	D2Mit218
D2Mit228	D2Mit228		MGI:92095	MGI:700321	TTGACACAAAAACCCAACCA	TCCATATGTACCTGACAACATGTG				isPCR	unmapped	2	99	D2Mit228
D2Mit234	D2Mit234		MGI:92101	MGI:706107	TGCATTGCTTAGTCCATGTATACA	TGTGTCTGAAGAAAACCAATGG				isPcr	unmapped	2	17	D2Mit234
D2Mit238	D2Mit238		MGI:92105	MGI:706116	ACCATCATTTTTGAACTCCACC	ACGCATATGCTCAGGACACA				isPCR	unmapped	2	28	D2Mit238
D2Mit244	D2Mit244		MGI:92112	MGI:706508	AGGGCTCTGCTCATGCAC	ACCACCTGTATCATGGACTTCA				isPCR	unmapped	2	33	D2Mit244
D2Mit252	D2Mit252		MGI:92121	MGI:702082	CAGTGCCGTGGAGAAGAAGT	AGTCATCAAGAGATTGACATTACACA				isPCR	unmapped	2	47.5	D2Mit252
D2Mit263.3	D2Mit263.3		MGI:3613992	MGI:701832	TTTCTGCTGTGGGTTCTAAGAA	ATGCGACTCAGGTCTCATGA				isPcr	unmapped	2	syntenic	D2Mit263.3
D2Mit268	D2Mit268		MGI:92138	MGI:705659	TAGTTTGAAAGGTGGCACCC	AGGTAATAGTGGCGTGCCAG				isPcr	unmapped	2	18	D2Mit268
D2Mit27	D2Mit27		MGI:92140	MGI:1347910	AGGCTAAGCCTTGCATCAAA	GTCGCAAAATGTGGATGATG				isPCR	unmapped	2	87	D2Mit27
D2Mit27	D2Mit27.1		MGI:92140	MGI:700417	TACAGATAGCTGTTATCCACCATGTG	CTCAGGGCTGATGTTTGATG				isPcr	unmapped	2	87	D2Mit27
D2Mit28	D2Mit28.1		MGI:92151	MGI:701517	GAAACCTCCGTCATATGGCC	AACCACTTCCCAGCATCTTTG				isPcr	unmapped	2	78.2	D2Mit28
D2Mit28	D2Mit28.3		MGI:92151	MGI:702736	GCTTCCCAATGATACCATGTGT	AAGGACTGTGGTAGTAGCTCTGTG				isPcr	unmapped	2	78.2	D2Mit28
D2Mit28	D2Mit28		MGI:92151	MGI:703064	TGCTTCTCTCATGGTATTACCTAG	ACAAACCACACAGACATTTACAAT				isPcr	unmapped	2	78.2	D2Mit28
D2Mit291	D2Mit291.2		MGI:92164	MGI:707504	AGTTCAAGGCACCCTGTCCT	GGCTTTACACTTTATGCTTCGG				isPCR	unmapped	2	99	D2Mit291
D2Mit298.2	D9Mit1013		MGI:3620570	MGI:702920	GAGGCAGGGTTTCTCTGTGT	GAATAATAGAAACTGCTGGGTAGTGG				isPCR	unmapped	2	syntenic	D2Mit298.2
D2Mit30	D2Mit30		MGI:92166	MGI:701259	CATCCAAGCAGTAACGTAGACG	AAATGTTACACCCTCTGCGG				isPcr	unmapped	2	69	D2Mit30
D2Mit305	D2Mit305		MGI:100734	MGI:705547	CTCAGAAAACATGCAATTGAGG	ATGAGTGCAAACCAAATAAAATTG				isPCR	unmapped	2	60.1	D2Mit305
D2Mit316	D2Mit316		MGI:100723	MGI:707356	CAGAAGATATTGCAGGATTGTCC	TTGTAGGCAGTTCTTAATTTTAAGATT				isPCR	unmapped	2	7	D2Mit316
D2Mit32	D2Mit32		MGI:92168	MGI:701257	AGGACAGAGTCACCTTAGTTGTCC	ATTTTAAAATTACTTGTGTGGGGC				isPCR	unmapped	2	11	D2Mit32
D2Mit326	D2Mit326		MGI:100713	MGI:701951	TTATTATCTGGGTCCTGGTTCC	CCTATTAATTGGAAGAATATCTTCACA				isPCR	unmapped	2	38.3	D2Mit326
D2Mit331	D2Mit331		MGI:100708	MGI:703773	AGGTTTGCTTTGTGACCACC	ATCACATTGAACCACACATACTCC				isPCR	unmapped	2	48.1	D2Mit331
D2Mit335	D2Mit335		MGI:100704	MGI:703769	TGAACCCATATACTATGGACATGC	GAAGTCTCCACAACTAAAGCGG				isPCR	unmapped	2	52.5	D2Mit335
D2Mit342	D2Mit342		MGI:100697	MGI:705987	CTCAAGAAACAGCAACAAGGG	CCTGCCTATGTGGCCCTG				isPCR	unmapped	2	83.1	D2Mit342
D2Mit345	D2Mit345		MGI:100694	MGI:705984	CAGCACGTAGTCATGCGTG	AACCTGGCCACCTCTTAGGT				isPCR	unmapped	2	91.8	D2Mit345
D2Mit347	D2Mit347		MGI:100692	MGI:705982	TAGTTCAGGTAAGTAAGGAAGTGTTCA	CGCATAATTCTGCATAGTAGCG				isPcr	unmapped	2	74.3	D2Mit347
D2Mit365	D2Mit365		MGI:100674	MGI:702398	GAGATCCCACTGATGATACAAGC	AGATGTGCCCAAGGGTCC				isPCR	unmapped	2	17	D2Mit365
D2Mit374	D2Mit374		MGI:100665	MGI:704187	ATCTAAATATATGTGGTCCTCTGTGTG	TGATCAGGATTTCCTAAAAGTTCA				isPCR	unmapped	2	29.5	D2Mit374
D2Mit377	D2Mit377		MGI:100662	MGI:707682	AGTCTATAATCCCAGGAAGTCTCG	TTAAAATAGTTCAACTGATAAACGCG				isPCR	unmapped	2	38.3	D2Mit377
D2Mit378	D2Mit378		MGI:100661	MGI:704190	CTGGAATTCCTCTCTCTCTCTCA	TTGTTGATTTTTTTTGCCATACA				isPCR	unmapped	2	38.3	D2Mit378
D2Mit381	D2Mit381		MGI:100658	MGI:704778	TGCTCTTTTCACAAATAGTTTTAAAA	ACACCATGTGCTTGCACG				isPCR	unmapped	2	42.6	D2Mit381
D2Mit39	D2Mit39		MGI:92175	MGI:701252	GGCATTTGGACCAAGTAAGAAAAT	GACCTGGGAGGCGGAGGTTG				isPcr	unmapped	2	50.3	D2Mit39
D2Mit402	D2Mit402		MGI:100637	MGI:706867	GGCTTTAAACTTGTATATAATGGTTCC	ACCACAAGAAACTCCCTCACA				isPCR	unmapped	2	66.7	D2Mit402
D2Mit404	D2Mit404		MGI:100635	MGI:706861	GATGGTGATGATGATGATGATG	GACGCGCACAGGAAATAGAT				isPcr	unmapped	2	81.7	D2Mit404
D2Mit41	D2Mit41		MGI:92177	MGI:704800	CGCTATCCTTAAGTGGTGTGC	CCTTGGGCACCTGTACTCAT				isPCR	unmapped	2	49	D2Mit41
D2Mit416	D2Mit416		MGI:100623	MGI:705048	CCGACATTTGGTTGTGTATACG	ATGTATGTGTTTCCCATGTGTACC				isPCR	unmapped	2	10	D2Mit416
D2Mit420	D2Mit420		MGI:100619	MGI:703281	ACATATCTGTATGTGAATGTTTGCG	GTTCCTTCTTCACAGGGAAGC				isPCR	unmapped	2	54.6	D2Mit420
D2Mit421	D2Mit421		MGI:100618	MGI:703282	TTGGGTGTGTGTGATGGTG	AATGCACACTCCTCACATGC				isPcr	unmapped	2	56.8	D2Mit421
D2Mit428	D2Mit428		MGI:101996	MGI:703288	TACTCTCAAAAATTCCATGTTTTTG	TACATTCCTTTCTCACGGGG				isPCR	unmapped	2	5	D2Mit428
D2Mit432	D2Mit432		MGI:102001	MGI:701479	CACATGGCTGCATTCAGACT	CTCTCTGAATGACAAATAATTTCCC				isPCR	unmapped	2	29.5	D2Mit432
D2Mit438	D2Mit438		MGI:102007	MGI:701482	TGTGCTTCCTAGGCAACATG	TATTTCTTGCATATTCTTTTTCTCTCA				isPCR	unmapped	2	50.3	D2Mit438
D2Mit438.1	D2Mit438.1		MGI:3614008	MGI:705449	TAGCCAAATAGAGAAGCTTAAGTCC	CATATTCATGTTGCCTAGGAAGC				isPcr	unmapped	2	syntenic	D2Mit438.1
D2Mit440	D2Mit440		MGI:102011	MGI:706480	TGGGTTCCAAGGATATGGAA	TTCCTATCATCAACTCTTATAGGTGTG				isPCR	unmapped	2	50.3	D2Mit440
D2Mit448	D2Mit448		MGI:102017	MGI:706488	TACTGTTTGCATTTGAGTGCG	AAAAAGTAATGGTTGGGGCC				isPCR	unmapped	2	61.2	D2Mit448
D2Mit452	D2Mit452.1		MGI:102022	MGI:706438	GACTCTAGAGGATCCCCCCA	GCACATGTGTGAGATGTAGCATGTAT				isPCR	unmapped	2	78.7	D2Mit452
D2Mit455	D2Mit455		MGI:102023	MGI:702043	CTCCAAGGTCTGATATACATACATACA	TTATGTGCACTGGTGTCTAGCC				isPCR	unmapped	2	80.9	D2Mit455
D2Mit460	D2Mit460		MGI:108864	MGI:1347834	TGTCTGTTTGTCCCCCTACC	ATGTCACCCCTCACCTCTTG				isPCR	unmapped	2	syntenic	D2Mit460
D2Mit465	D2Mit465		MGI:105660	MGI:702896	CCTTGGGGTTTTGATTACCA	TCTAAACTTCCCTGCCTCCC				isPCR	unmapped	2	10	D2Mit465
D2Mit470	D2Mit470		MGI:105665	MGI:701091	AGACAAATAAAAAAGGAGAACTCACC	GTTGAAAGTTGCCCCATCC				isPCR	unmapped	2	29.5	D2Mit470
D2Mit472	D2Mit472		MGI:105667	MGI:701093	ATGGTCCTCTCTGTAAAGGTTTG	TTACTGTCCAGTCCCAACTCTG				isPCR	unmapped	2	38.3	D2Mit472
D2Mit477	D2Mit477		MGI:105672	MGI:701096	AACAAAAGAAAAAAGGAAAAGCC	TGTGTGTCTTTATAGTTTCATTCTGTC				isPcr	unmapped	2	50.3	D2Mit477
D2Mit478	D2Mit478		MGI:105673	MGI:701089	GTATTGCTCAATGTCGTTTACTGG	CGAGCACAGATGACTCAGGA				isPCR	unmapped	2	50.3	D2Mit478
D2Mit478	D2Mit478.1		MGI:105673	MGI:703109	ATATGGTTCTGCCCTCTGCA	AAAACCCAGTAAACGACATTGAGC				isPCR	unmapped	2	50.3	D2Mit478
D2Mit491	D2Mit491		MGI:105686	MGI:704305	CTGGTTCACACCCTTGCC	AGTAACCACAGGATTCTTTGTTCC				isPCR	unmapped	2	81.7	D2Mit491
D2Mit495	D2Mit495		MGI:105690	MGI:704301	AGACCCTGTCTCACACCACC	ATGTGGTCCTGATTTTTGGG				isPCR	unmapped	2	73.2	D2Mit495
D2Mit499	D2Mit499		MGI:105694	MGI:704312	AGAAAATGTGTCCCCCTTCC	TAGAAGAAAAGATCAGTGTGCTGG				isPCR	unmapped	2	85.2	D2Mit499
D2Mit50	D2Mit50		MGI:92187	MGI:705227	GGGTAGCTTCCTTACTTTCCTAGC	GGGGGTGGGTCTAGTTCAG				isPCR	unmapped	2	95.5	D2Mit50
D2Mit51	D2Mit51-pA	D2Mit51-pB	MGI:92188	MGI:1332444	GTGAGGGGTCAATGCCACCA	GGCTCAGTTGTAAGCACAAG				isPCR	unmapped	2	95.5	D2Mit51
D2Mit51	D2Mit51		MGI:92188	MGI:705228	GTGAGGGGTCAATGCCAC	GGCTCAGTTGTAAGCACAAGG				isPCR	unmapped	2	95.5	D2Mit51
D2Mit522	D2Mit522		MGI:107070	MGI:704178	GGATTGGTTCAGCAGGGTTA	TCACCAACCCTACAAGGAGG				isPCR	unmapped	2	25.1	D2Mit522
D2Mit59	D2Mit59		MGI:92195	MGI:705104	TCCCAGAGTGCTTATATGA	AGAAAANACAGAAAAATCAC				isPcr	unmapped	2	86	D2Mit59
D2Mit72	D2Mit72		MGI:92208	MGI:701631	AGCAGCAGGCACATTTTTTT	TACAGTATCCTCTAGAACCAGGCA				isPCR	unmapped	2	30	D2Mit72
D2Mit82	D2Mit82		MGI:92219	MGI:707442	GGACAATGGCTCTGGGTTTA	GCTTTCTAACCTCAAGCATTAAGC				isPCR	unmapped	2	14.5	D2Mit82
D2Mit87	D2Mit87		MGI:92224	MGI:706401	CTGCACTTAGGCTGGCTTG	GAAGTTTCTGATAGAGGTTGGGG				isPCR	unmapped	2	28	D2Mit87
D2Mit95	D2Mit95		MGI:92233	MGI:705626	AGAAGTCATTCCTCTCTGTTTGTG	TTTGGAGGCAGTTAGGGCTA				isPcr	unmapped	2	47	D2Mit95
D3Mit1000	D15Mit139.2		MGI:90271	MGI:702929	ACTTTTTAACTGAGTCACCACAAGC	GGAGCTCACCCTTTCCTTTT				isPcr	unmapped	3	syntenic	D3Mit1000
D3Mit120	D3Mit120		MGI:92387	MGI:706448	CAGTCCCCAAGACACACATG	TACAGGATTGAGGCTAGTTTTCG				isPcr	unmapped	3	28	D3Mit120
D3Mit13	D3Mit13		MGI:92397	MGI:705972	TTTCTGCATTATGTGGGCTT	AACCACAGATGACAATTGAA				isPCR	unmapped	3	61.8	D3Mit13
D3Mit130	D3Mit130		MGI:92398	MGI:704664	AACACATGAAACGTGTGCGT	TGATAGGCATGCTTAAGCCC				isPCR	unmapped	3	3.9	D3Mit130
D3Mit14	D3Mit14		MGI:92408	MGI:702683	ATTGCGGTTAAAGTTTGCTT	TCCTGCAAATTGTCCTCTGA				isPCR	unmapped	3	64.1	D3Mit14
D3Mit18	D3Mit18		MGI:92452	MGI:700568	GAACAGTTCCCAGGTCCTCA	CTGCCTTTAAATTCTGTCACCC				isPCR	unmapped	3	76.2	D3Mit18
D3Mit18	D3Mit18.3		MGI:92452	MGI:701179	AAGGGGGAGCTTATTAATCGTA	GAGCGGATAACAATTTCACACAGA				isPCR	unmapped	3	76.2	D3Mit18
D3Mit19	D3Mit19		MGI:92463	MGI:700563	CAGCCAGAGAGGAGCTGTCT	GAACATTGGGGTGTTTGCTT				isPCR	unmapped	3	87.6	D3Mit19
D3Mit23	D3Mit23		MGI:92497	MGI:700633	GATTCCAGAACACATTGTGGG	TCAATCAGAGAGATAAGAGCATGG				isPCR	unmapped	3	4.6	D3Mit23
D3Mit235	D3Mit235		MGI:100600	MGI:704567	ATGGAATCTTTGTGCTTGACG	ACATTCAATAGTTCTTTTAAAATGGTG				isPCR	unmapped	3	1.1	D3Mit235
D3Mit242	D3Mit242		MGI:100593	MGI:705925	TTCCCAAACTAGGCTGACTCA	CTTGTCTGGTTTAAAGCGTGC				isPcr	unmapped	3	33.7	D3Mit242
D3Mit246	D3Mit246		MGI:100589	MGI:705929	ATCCATCATGCTCCCAAAAG	TCCTTCTATCCCCATACCCC				isPCR	unmapped	3	39.7	D3Mit246
D3Mit248	D3Mit248		MGI:100587	MGI:705933	CACAAAGGTCCATTGTGTGTG	ATGCTTTAATGCTGCTATCAACA				isPCR	unmapped	3	51.1	D3Mit248
D3Mit252	D3Mit252		MGI:100583	MGI:707746	GGGGGAGCATTTCACATTC	GGACCTGGAGAGATAGTTGTGG				isPCR	unmapped	3	58.8	D3Mit252
D3Mit260	D3Mit260		MGI:100575	MGI:702358	ACTGGAGCCTGCAGAGGTTA	GTTTACAGAAGGGAAGCCCC				isPCR	unmapped	3	72.9	D3Mit260
D3Mit272	D3Mit272		MGI:100563	MGI:704140	TTATGCATTCATTTGTTTTTAATGTG	ATGTGTCCCCACCCACAC				isPCR	unmapped	3	16.5	D3Mit272
D3Mit279	D3Mit279		MGI:100556	MGI:704152	TTACCCCTCTCTTTCTTTAAGTGTG	ATCCCTAGGGCTTCTTGCTC				isPCR	unmapped	3	33.7	D3Mit279
D3Mit28.1	D3Mit28.1		MGI:3614042	MGI:703568	GCCTAGCAGGGTATAAATAGGTCA	TAAAGACATCTGTTCCCCCAC				isPCR	unmapped	3	syntenic	D3Mit28.1
D3Mit282	D3Mit282		MGI:100553	MGI:705513	CCTGATCTGCACGCACAC	AGTTTGACTTGTGTAACACCTCTCC				isPCR	unmapped	3	41	D3Mit282
D3Mit288	D3Mit288		MGI:100547	MGI:705517	AGGTGATGACCACAGAGTTGG	CAAAGCAGCACTTAAAACTCACA				isPCR	unmapped	3	58.8	D3Mit288
D3Mit298	D3Mit298.1		MGI:100537	MGI:700786	GCCTGCAGGTCGACTCTAGA	TGGACTGCCATCTCTTTTGA				isPCR	unmapped	3	49.7	D3Mit298
D3Mit301	D3Mit301		MGI:105703	MGI:705032	CAACTTGAAAGTCAAAACTAATACACA	AAGCCAGGGAAACTTGGAAT				isPcr	unmapped	3	58.8	D3Mit301
D3Mit303.2	D3Mit303.2		MGI:3614046	MGI:703629	AGACACACACAGAGCAGGCA	ATAGGGCACAGAAAGCCCAG				isPcr	unmapped	3	syntenic	D3Mit303.2
D3Mit305	D3Mit305		MGI:102029	MGI:705028	GAATCTAACTTGGGGACCTGC	TACAGAAAGGTGATTGGAGTTGG				isPCR	unmapped	3	11.2	D3Mit305
D3Mit308	D3Mit308		MGI:102032	MGI:705035	GAGGCATATTAAAATTAATTGGTGC	ATGTTGATTTGCAATGAAAGG				isPCR	unmapped	3	23.3	D3Mit308
D3Mit310	D3Mit310		MGI:102034	MGI:703239	CTCCTGACCTACAAGGGCAC	CCTGTATGTATGTTGTGCACCG				isPCR	unmapped	3	38.3	D3Mit310
D3Mit312	D3Mit312		MGI:102036	MGI:703241	AAAACAAATTAAATGGTCTGTATTTCA	GCATAGTCTACATAGTAAAATCCTGGA				isPCR	unmapped	3	49.7	D3Mit312
D3Mit322	D3Mit322		MGI:102046	MGI:701043	CATGCTGTGGAGTGTACATACTTG	CCAAGATGACCCCCTAACAA				isPCR	unmapped	3	83.5	D3Mit322
D3Mit323.1	D3Mit323.1		MGI:3614047	MGI:706549	GGAAATTTTCCCCCTTTTCA	ACATAGGTTGAGGATCCTTATTCC				isPcr	unmapped	3	syntenic	D3Mit323.1
D3Mit338	D3Mit338		MGI:105715	MGI:706830	GTCCAATACCAAGAAGTCAGCC	CAATCCTAATCTGAAACAGAATTCC				isPCR	unmapped	3	38.3	D3Mit338
D3Mit339	D3Mit339		MGI:105716	MGI:706829	TCTATATTTGGGGGGAAGGG	GATTTAGTGTCAAAGGCTATGCA				isPCR	unmapped	3	38.3	D3Mit339
D3Mit342	D3Mit342		MGI:105719	MGI:705416	CCAGGGATCTACATAACTAATGTGC	CTGAGATTCCTCAAGGGCAG				isPCR	unmapped	3	49.7	D3Mit342
D3Mit343	D3Mit343.1		MGI:105720	MGI:701200	ACTCTAGAGGATCCCCCCTG	ACAAGGTGCAAGTGTCCCAA				isPCR	unmapped	3	52.5	D3Mit343
D3Mit344	D3Mit344		MGI:105721	MGI:705422	TAATGTTTCTTCTCCAAAATGTCTC	CAACTTTTTGTTTAGCAAGAGGTG				isPCR	unmapped	3	55	D3Mit344
D3Mit345	D3Mit345.1		MGI:105722	MGI:702046	TCGACTCTAGAGGATCCCCC	CTCTACAAGAGTGGAGAGAAATTCA				isPCR	unmapped	3	55	D3Mit345
D3Mit352	D3Mit352		MGI:105729	MGI:703662	CGCAAAAGGCAGAGGTAAGT	TGCTTGCCTCTCTCCACC				isPCR	unmapped	3	83.5	D3Mit352
D3Mit354	D3Mit354		MGI:107079	MGI:703656	ACTCGAGATTCCTCTCAA	CTAGGAAAGAAAGCTATTGCAT				isPcr	unmapped	3	18.6	D3Mit354
D3Mit36	D3Mit36		MGI:92506	MGI:702406	GATTTTAATTCATTAAATAAGGGTTAG	GAACATATGTGTAAGTAAAATGTAC				isPcr	unmapped	3	55	D3Mit36
D3Mit45	D3Mit45		MGI:92515	MGI:703719	CCATGATGTAAAGCCCAACC	TTAACACCCCAATGTAGTGGTG				isPCR	unmapped	3	78.5	D3Mit45
D3Mit46	D3Mit46		MGI:92516	MGI:703720	ATCCCCCACCCAACTCTAAC	TTCCCCAGGGAAATCTCTCT				isPCR	unmapped	3	13.8	D3Mit46
D3Mit46.3	D3Mit46.3		MGI:3623324	MGI:701112	CTCAGGACATCAAAACCAGAGAG	CCCAAGTCCTATAGGGACAGACT				isPCR	unmapped	3	syntenic	D3Mit46.3
D3Mit51	D3Mit51		MGI:92521	MGI:705492	GGCACTGATAGCAGGCCTAG	TCTCTTCTGGTATTTCCTTCCG				isPcr	unmapped	3	35.2	D3Mit51
D3Mit52	D3Mit52.3		MGI:92522	MGI:707389	AGCCATAAATGCATGCAATC	CAAAATCCAGGCATCAGCTT				isPCR	unmapped	3	34.4	D3Mit52
D3Mit52	D3Mit52.2		MGI:92522	MGI:707390	AGCCAGGATATGGAATATGCC	GGGACATGGACATACATATACACA				isPCR	unmapped	3	34.4	D3Mit52
D3Mit61	D3Mit61		MGI:92532	MGI:707796	CTTGTGGCAACAATCAAAATG	ATGCCTAAGAAAGGAGCCCT				isPcr	unmapped	3	2.4	D3Mit61
D3Mit64	D3Mit64		MGI:92535	MGI:707791	GCATGCTTACAATCAACAGCA	TTATCTCTCTGCAACAGAGACCC				isPCR	unmapped	3	23.3	D3Mit64
D3Mit83	D3Mit83		MGI:92555	MGI:703325	TTGTATCCCCCACCTCCTC	CTTCAGTTCTGTTATCTTTTCCCC				isPcr	unmapped	3	65.2	D3Mit83
D3Mit9	D3Mit9		MGI:92562	MGI:703744	AACTTCATTTGCTTGGAAACTACC	TGTTTTATATTGCCCTGTATGTGC				isPCR	unmapped	3	38.3	D3Mit9
D4Mit1004	D17Mit264		MGI:106971	MGI:706936	TGGAAGGCATCATATGTATTTCC	GTTCAAGGATACACAGACATAGATGC				isPCR	unmapped	4	syntenic	D4Mit1004
D4Mit1006	DXMit215		MGI:105908	MGI:706229	AAAATGGTGAGAAAATGAGAAACC	AATAAAAATGCTCCCCCTGC				isPCR	unmapped	4	syntenic	D4Mit1006
D4Mit1010	D8Mit315		MGI:102204	MGI:701132	AGCCAGGGCACTCGAGTC	GCAATCTGATCACAAACCTAGC				isPCR	unmapped	8	54	D8Mit315
D4Mit1011	D3Mit54		MGI:92524	MGI:705490	TCAGTTGACAGGGGACATTTACT	AACTACACACACACACCTCATGC				isPCR	unmapped	3	4.6	D3Mit54
D4Mit111	D4Mit111		MGI:92733	MGI:703452	TGAGATGTTGGCATACTGTGTG	TTGTAAGCCTAACTTTATCCACCC				isPCR	unmapped	4	21.9	D4Mit111
D4Mit121	D4Mit121		MGI:92744	MGI:1347930	ACCCGGGGATCCTCTAGTAA	CATTTTGGTATTAATGATCTTTCTGG				isPCR	unmapped	4	56	D4Mit121
D4Mit18	D4Mit18		MGI:92808	MGI:700231	AATTAGCCCGGAGCTTGATT	GCTTCCATACATTTGCTTTTCC				isPCR	unmapped	4	5.2	D4Mit18
D4Mit180	D4Mit180		MGI:92809	MGI:700868	GACAAACCACATGTAATGTGTGG	CTGCCTGCAGGCTGTATGTA				isPCR	unmapped	4	81	D4Mit180
D4Mit183			MGI:92812	MGI:700865	GGGCTATACCTATTCAAACCACC	GATTTTGGATATACATGGTAGACGC				isPcr	unmapped	4	17.9	D4Mit183
D4Mit188	D4Mit188		MGI:92817	MGI:702774	CATGCTCACAAGATTGGGG	AAGTTGACCTCCAGCACCC				isPCR	unmapped	4	67	D4Mit188
D4Mit19	D4Mit19		MGI:92819	MGI:700232	ACAGATGTGCATGATATCATTTCC	GCAGGCTTCATTCCTAGCC				isPCR	unmapped	4	5	D4Mit19
D4Mit198	D4Mit198		MGI:92828	MGI:702627	ATGAGGATGTTTTTTTTTTTTGTG	ATCATTTGCCCTTTAATCTACTCC				isPCR	unmapped	4	syntenic	D4Mit198
D4Mit202	D4Mit202		MGI:92833	MGI:705336	GTCTTTTCCCTTGGGGATTC	AAGGGAATAATACCAGAGGGTACC				isPCR	unmapped	4	59.1	D4Mit202
D4Mit205	D4Mit205		MGI:92836	MGI:705339	TGTGTGAACATGTCTACCCC	GGGGACCGAAGTAACAGTGA				isPcr	unmapped	4	71	D4Mit205
D4Mit213	D4Mit213		MGI:92845	MGI:703587	TTGCTACCTGTGACCCACAG	TCAGTGAAAGAAATTGCTTTGTG				isPCR	unmapped	4	13.3	D4Mit213
D4Mit224	D4Mit224		MGI:92856	MGI:701734	ATTCTGGGTTGGCCTGTG	TGCAACCATGGAGACATAGTG				isPcr	unmapped	4	60	D4Mit224
D4Mit23	D4Mit23.2		MGI:92859	MGI:707496	TATTATGCCAGAGCAATAGGGT	GACGGTATCGATTAAGCTTGGATAT				isPcr	unmapped	4	14.3	D4Mit23
D4Mit232	D4Mit232		MGI:100527	MGI:707544	GCGTCACCACACTGCTCTT	ACTCAGAGTCCCCTGGCC				isPCR	unmapped	4	71	D4Mit232
D4Mit234	D4Mit234.2		MGI:100525	MGI:702872	TCCTGTCCTACCTGATTTCCTACT	ACTTAACCCTCCTCTAAAGCCCTTAA				isPCR	unmapped	4	71	D4Mit234
D4Mit234	D4Mit234		MGI:100525	MGI:707546	TTGTAATCCTCTCCCTTTAAAACA	AACCCTGGACAGCAAGTCC				isPCR	unmapped	4	71	D4Mit234
D4Mit248	D4Mit248		MGI:100511	MGI:705741	CTCTCAAGTGTACTCTTTGGTTGG	AGCACACCCACTGGATGTTA				isPCR	unmapped	4	55.2	D4Mit248
D4Mit25	D4Mit25		MGI:92861	MGI:705589	ATGGTGCAACTCACAAAGTCC	CACAGATGGAAAGAGTGTCTTCC				isPCR	unmapped	4	32.6	D4Mit25
D4Mit255	D4Mit255		MGI:100504	MGI:703970	GAACCCAGTATATGAATACTGAGAACC	CACTGATGTTATCATAGTGGTTTGC				isPCR	unmapped	4	48.5	D4Mit255
D4Mit26	D4Mit26		MGI:92862	MGI:705588	CTGATGGTAGCAGAATCAGGC	CGGTAGTTTTTCAAAGATCGTG				isPCR	unmapped	4	42.5	D4Mit26
D4Mit262	D4Mit262		MGI:100497	MGI:702155	TGCCTTCATTCAAAACTCCC	CAGAGCAATTGTGATAAAAACTGC				isPcr	unmapped	4	5.7	D4Mit262
D4Mit276	D4Mit276		MGI:100483	MGI:700381	TCCCCTTTTTTGTGTTTTGG	GAAGACTGACACCCTGACATTG				isPCR	unmapped	4	40	D4Mit276
D4Mit28	D4Mit28		MGI:92864	MGI:705599	CGTTGACTTGAATAGTTTGACTGC	GGCTGTGGCTTTCATTTCAT				isPCR	unmapped	4	48.5	D4Mit28
D4Mit282	D4Mit282		MGI:100477	MGI:706162	GATGGTGGTGGTGGTGGT	CTTGAGTTTGATCCCAGGGA				isPCR	unmapped	4	66	D4Mit282
D4Mit283	D4Mit283		MGI:100476	MGI:701202	CTGGGGGATAGATGCATGTT	GCAGGACAGATGATTTTCCC				isPCR	unmapped	4	69	D4Mit283
D4Mit291	D4Mit291		MGI:102049	MGI:701583	CCCGCGCCTAAGATTTTAAA	CATATGGGAATGATGGGAATG				isPCR	unmapped	4	5	D4Mit291
D4Mit292	D4Mit292		MGI:102048	MGI:700990	TAAATACCACCTTAAAAGTTTTGTGTG	CTACTACTGCTGCTGCTACAACTACC				isPCR	unmapped	4	7.5	D4Mit292
D4Mit297	D4Mit297		MGI:102054	MGI:701589	AGTGAAGACATGCGCTTCCT	GGAGAAGCCAAGCAATCAAA				isPCR	unmapped	4	38	D4Mit297
D4Mit299	D4Mit299		MGI:102056	MGI:704369	AAACCCACTTAGAAAATGTGCC	ATTACTGTGGCTACCCCGTG				isPCR	unmapped	4	40	D4Mit299
D4Mit306	D4Mit306		MGI:102063	MGI:703204	CCACTATTGCTGCCACCAC	TAAAAACAGGACATCGCTAATAAGG				isPCR	unmapped	4	50.8	D4Mit306
D4Mit313	D4Mit313		MGI:102070	MGI:700887	CTTCTTTAATCAATCTCTGTCTCTGTG	GGGCACATATGAACCTCCTG				isPCR	unmapped	4	81.5	D4Mit313
D4Mit323	D4Mit323		MGI:105609	MGI:702649	TCACTAACTACCACACAGTATTTTGTG	TAATTTAATTCTATGTTCTCCTGCTCC				isPCR	unmapped	4	35	D4Mit323
D4Mit326	D4Mit326.2		MGI:105606	MGI:700819	CGGTAAATACAAATTGTCCTCAGC	CAAGTTTCATTCTGCAAGATGG				isPCR	unmapped	4	31	D4Mit326
D4Mit330	D4Mit330		MGI:105602	MGI:704712	AAATCTCCCTTTAAGGCTTC	TTCTTAACTCTAGTCCAGAGG				isPCR	unmapped	4	49.6	D4Mit330
D4Mit351	D4Mit351		MGI:107089	MGI:704411	TGCCACCACATCTGCTAAGA	TTCTACATGTGTATCATACGATGTGC				isPCR	unmapped	4	56.5	D4Mit351
D4Mit353	D4Mit353		MGI:107091	MGI:704408	GAATGCCATGGTTGGGAG	CCCTGATTCTATGTGGGTGC				isPCR	unmapped	4	71	D4Mit353
D4Mit355	D4Mit355		MGI:107093	MGI:704416	GCAGGCATCACAGACGTCTA	GTTCCTGGTGTGGATGTGGT				isPCR	unmapped	4	71	D4Mit355
D4Mit355	D4Mit355.1		MGI:107093	MGI:705695	AGGCCTTTCTCCTGATATGAATC	TAGACGTCTGTGATGCCTGCT				isPCR	unmapped	4	71	D4Mit355
D4Mit4	D4Mit4		MGI:92872	MGI:700336	CGGAATAGGCAGCTATGCTC	TCCATAGACCCTGCATGTGA				isPCR	unmapped	4	12.1	D4Mit4
D4Mit6	D4Mit6		MGI:92894	MGI:700338	TGTGGGCAGTGTAAGCACTC	CTTTCCTCTGTGCTCGTGTG				isPCR	unmapped	4	20.8	D4Mit6
D4Mit61	D4Mit61		MGI:92896	MGI:706022	AGGTTTTATTTAGCCTACAGATGG	TTCACACATATTGCACAAGAACC				isPCR	unmapped	4	81	D4Mit61
D4Mit62	D4Mit62		MGI:92897	MGI:706021	TCCTCTGCCAGCTCTCTCTG	CTGCAAGGAGGTGATGTTCA				isPcr	unmapped	4	79	D4Mit62
D4Mit66	D4Mit66		MGI:92901	MGI:706025	AGAGCATGAATAAGATGTGCACA	GACTGTGAGGACAAGGCTTTG				isPCR	unmapped	4	69	D4Mit66
D4Mit77	D4Mit77		MGI:92913	MGI:703887	AAAGTGGGAGAATGTGGCAC	TATTGATGAGTGTGAAGCAAAATG				isPCR	unmapped	4	42.5	D4Mit77
D4Mit80	D4Mit80		MGI:92916	MGI:702836	CTCTTCTCACGTCCTTAGTTAAGC	GAGTGTGCCCTCCACATTTT				isPCR	unmapped	4	37.7	D4Mit80
D4Mit86	D4Mit86		MGI:92922	MGI:702842	GACACCGCCATCTTTGTTTT	AAGTCACTGTCTACAAAGGGTGTG				isPCR	unmapped	4	37.6	D4Mit86
D4Mit91	D4Mit91		MGI:92928	MGI:701021	ATTCTGACACTAGGGGGCG	GTTCTCTTACTTGCCATTTGTGG				isPCR	unmapped	4	15.6	D4Mit91
D5Mit1008	D17Mit265		MGI:108729	MGI:706935	ATACATAAAGACAGGCACGTGTG	AATATCAACCTGTGACTGGCG				isPCR	unmapped	17	syntenic	D17Mit265
D5Mit119	D5Mit119		MGI:93189	MGI:700840	AATCAGAATCTTTCAGATCAAAAGG	GGGTAGGAAGGGCATCTGAT				isPCR	unmapped	5	72	D5Mit119
D5Mit127	D5Mit127.1		MGI:93198	MGI:703381	GAGCTTGCATGCCTTCAAGA	GTGCAGTAGTAGCCTTTAGTCAAGC				isPCR	unmapped	5	20	D5Mit127
D5Mit14	D5Mit14		MGI:93212	MGI:704349	GCCTGTACCTTGTTCAAGGG	TCTAGCGAACTCCCCAACTC				isPcr	unmapped	5	26	D5Mit14
D5Mit167	D5Mit167		MGI:93242	MGI:706615	GTTGAGGGTGGCTAAGACTCC	AAAGAGAGGGGATGGAGGAA				isPcr	unmapped	5	78	D5Mit167
D5Mit17	D5Mit17		MGI:93245	MGI:704350	GAAAGATATTTCTCCTTTTTNCGG	ACACACTTATGCCTACACAC				isPcr	unmapped	5	45	D5Mit17
D5Mit186	D5Mit186		MGI:93263	MGI:701744	GCACAATTGGTGTTGTCTATCTG	TGACTATGCCCCACTGTTAGC				isPcr	unmapped	5	45	D5Mit186
D5Mit19	D5Mit19		MGI:93267	MGI:704346	GAGAAAATCCACACCTCAAAGG	GAGGACACCATTTAACTGCTCC				isPCR	unmapped	5	45	D5Mit19
D5Mit200	D5Mit200		MGI:93278	MGI:704535	CACAGAGAAGAATCTGCGAGC	TTGCAAAGTGTTTTAATCAGTATTTG				isPcr	unmapped	5	36	D5Mit200
D5Mit23	D5Mit23		MGI:93309	MGI:706142	GCGGATTTCTGTAAGTTTAAGACT	ATGATACCAATATACCCCTTCTCC				isPcr	unmapped	5	54	D5Mit23
D5Mit237	D5Mit237		MGI:93317	MGI:706675	AAAACAATTCCAGGATGGAGG	GGTCCAGATTAATTGAAAAATTTTG				isPCR	unmapped	5	45	D5Mit237
D5Mit246	D5Mit246		MGI:93327	MGI:700914	AAAGGCCGCCTCTGTTAAAT	GAACAGCCTATGAGATCATCAGG				isPCR	unmapped	5	74	D5Mit246
D5Mit257	D5Mit257		MGI:100459	MGI:702690	TTAGCCCACTGTAGCATCACC	TATTTTTCACACAAGAACTTACTGGG				isPCR	unmapped	5	41	D5Mit257
D5Mit259	D5Mit259		MGI:100457	MGI:702688	ATGATCAAAACATTACTCCCTTCC	ACAAAGTCAGGAGAAATGTGCA				isPCR	unmapped	5	45	D5Mit259
D5Mit267	D5Mit267		MGI:100449	MGI:704505	AAGATGTTTCTGCCAGGATAGTG	TGGCATACCCAAGCAGATAA				isPcr	unmapped	5	24	D5Mit267
D5Mit269	D5Mit269		MGI:100447	MGI:704499	ACAAAAAAGAAAAAGCATGAGACA	CTGACAACTGCCTTGCAAAA				isPcr	unmapped	5	36	D5Mit269
D5Mit271	D5Mit271		MGI:100445	MGI:706277	CTCATACAACTTACATATATTGACCGC	TGATGTCTATGTGAAATATCATGTGC				isPCR	unmapped	5	44	D5Mit271
D5Mit273	D5Mit273		MGI:100443	MGI:706279	TATGCTCTCTTTCAAATGCATAGC	TATTTAGGAATGCATCACACGC				isPCR	unmapped	5	45	D5Mit273
D5Mit298	D5Mit298		MGI:100418	MGI:707533	AGACCTATATTTCCCCTAGTAGATTGC	ATTATAGGTGATCACAACTGCTTCC				isPcr	unmapped	5	28	D5Mit298
D5Mit305.2	D5Mit305-pA	D5Mit305-pB	MGI:3620580	MGI:1345080	AAGATGGGAAAATCAGGGATG	AAATGTTCCCTCATTTTCTTCC				isPCR	unmapped	5	syntenic	D5Mit305.2
D5Mit31	D5Mit31		MGI:93335	MGI:700346	TCAGGGCTCTCTAAGGGACA	ACTATGCAGCCACCAAATCC				isPCR	unmapped	5	78	D5Mit31
D5Mit333	D5Mit333		MGI:100383	MGI:700548	CCCCTACTCTCTCTCAAATCCA	ACACCAGCCATCCAAGACTC				isPCR	unmapped	5	18	D5Mit333
D5Mit339	D5Mit339		MGI:100377	MGI:702184	GATCCTGGAAGCGTTTGTGT	GTGTTGTCTGGCATCTCCCT				isPCR	unmapped	5	72	D5Mit339
D5Mit343	D5Mit343		MGI:102074	MGI:707162	TGTCAATGTCATGACTTTCTCTCC	CTACAAAAACACTAAATGGAGAAATTG				isPcr	unmapped	5	1	D5Mit343
D5Mit356	D5Mit356		MGI:102084	MGI:705366	CCATGCCCAGTCTGGTATCT	TTTTACTTTCCACTAAGCATTCCC				isPCR	unmapped	5	41	D5Mit356
D5Mit386	D5Mit386		MGI:105731	MGI:700859	CTGGGTCATGGCATAGGAGT	AATGTCACATTTAAGCATAGAACACA				isPCR	unmapped	5	14	D5Mit386
D5Mit4	D5Mit4		MGI:93340	MGI:703141	CTAGTCATTGGCTCCAAGGG	ATGCACTGGGAGAGTGAAGG				isPCR	unmapped	5	20	D5Mit4
D5Mit401	D5Mit401		MGI:105746	MGI:706290	GTCTATGAATGTGTTACCCCTTCC	TTGTGTGTATGTCTCTCTGTGAGTG				isPCR	unmapped	5	53	D5Mit401
D5Mit403	D5Mit403		MGI:105748	MGI:706288	GGCTCTAGCCATTCCATGTG	CTCATGCTCACTCACCTCCA				isPCR	unmapped	5	56	D5Mit403
D5Mit406	D5Mit406		MGI:105751	MGI:706293	AGGCACTGCACTTACATAGGC	TGAGCCATCTCTCTAGACCCA				isPCR	unmapped	5	64	D5Mit406
D5Mit408	D5Mit408		MGI:105753	MGI:706286	GGTGGGACCAATGAGCAG	ACTGACCCCAGACGGGTT				isPCR	unmapped	5	67	D5Mit408
D5Mit427	D5Mit427		MGI:107105	MGI:702703	GGCAGTTCACCTTGGTGTTT	ACACCTAGGAAGGAAGGACTCC				isPCR	unmapped	5	72	D5Mit427
D5Mit429	D5Mit429		MGI:107107	MGI:702705	TGCATGTACACACATGGGC	CTACACAGAAGACCTGCCCTG				isPCR	unmapped	5	84	D5Mit429
D5Mit49	D5Mit49		MGI:93349	MGI:706203	TTGTGGGACCTGCACATG	CCTTATGCAAACTTAATTCAATGG				isPCR	unmapped	5	0	D5Mit49
D5Mit50	D5Mit50		MGI:93351	MGI:705798	TCCCTCTTAGGCTCACGAAA	ATTTTTCTGGCCTCTGTAGGC				isPcr	unmapped	5	83	D5Mit50
D5Mit57	D5Mit57		MGI:93356	MGI:707732	CTAGGGCAAAGGAGCAAGG	ATTCAGGAAGCAATGATGGC				isPCR	unmapped	5	28	D5Mit57
D5Mit61	D5Mit61		MGI:93361	MGI:705726	TGTGAGGGTGTTTGAGAGACA	AAAGCTCTGAGTTTGATACACAAA				isPCR	unmapped	5	8	D5Mit61
D5Mit74	D5Mit74		MGI:93375	MGI:707526	CACCCTGGGACTATAAAAGTCG	CTTAGCATGTGTAAAAACCCTGG				isPCR	unmapped	5	11	D5Mit74
D5Mit85	D5Mit85		MGI:93386	MGI:701703	TTATTCCTTCTCCCCATCCC	AGTTGAGACCCCGGAGTTCT				isPcr	unmapped	5	44	D5Mit85
D5Mit85	D5Mit85.3		MGI:93386	MGI:702822	ACAAGAACTCCGGGGTCTCA	TGACAGCTGTAGCCTAGCAGC				isPcr	unmapped	5	44	D5Mit85
D5Mit92	D5Mit92		MGI:93394	MGI:703556	CTATCTCTTCATGAGGCATTTGG	ACACCTTTTTAAAAAGACCACTGC				isPCR	unmapped	5	53	D5Mit92
D5Mit96	D5Mit96.1		MGI:93398	MGI:704045	ATGCAGTGACTCCTGCCAAA	CACACATATGGAGATCAGATCAGAAG				isPCR	unmapped	5	68	D5Mit96
D5Mit99	D5Mit99		MGI:93401	MGI:703561	CAGAAAAGAGAAAACGGAGGG	TTCCTGCTGCCTGAAGTTTT				isPcr	unmapped	5	80	D5Mit99
D6Mit110	D6Mit110		MGI:93536	MGI:701883	GGATGTTCAGAATACAGATACAGCA	GTTGCAGTGGCACCCTTTAA				isPCR	unmapped	6	63.9	D6Mit110
D6Mit120	D6Mit120		MGI:93547	MGI:706664	ATCAGTCATTTCTACTTTCAATCCTAA	CATGATTAAGTTCACTCCTATGTGTG				isPCR	unmapped	6	28.5	D6Mit120
D6Mit150	D6Mit150		MGI:93580	MGI:704484	GGTAACAAAAAAAGGAAACCACC	ATTATTGAGCATTTCCCCCC				isPCR	unmapped	6	51	D6Mit150
D6Mit155	D6Mit155		MGI:93585	MGI:704481	TGTTTGAGGGAAGAGCGC	TGTCAATTACAGTAGCAAAGAGCC				isPCR	unmapped	6	34.2	D6Mit155
D6Mit160	D6Mit160		MGI:93591	MGI:706265	AAGAGGACAGGCTAGTCTCGG	AGCAAAGCTGAAAAGAAAGGG				isPCR	unmapped	6	6.7	D6Mit160
D6Mit163	D6Mit163		MGI:93594	MGI:707500	GTGTATAAAACCATCATGCATGC	GAGCTCTGGCATCCACATTC				isPcr	unmapped	6	67	D6Mit163
D6Mit182	D6Mit182		MGI:93614	MGI:703862	TTCCACCGTAAGGCAATGAT	TTAATCTTAATTGGATTCTGTATGGTG				isPCR	unmapped	6	17.5	D6Mit182
D6Mit182.1	D6Mit182.1		MGI:3614116	MGI:702543	CAACAGGCTGAGAAAAGAAGGTT	TCATTGCCTTACGGTGGAAAA				isPcr	unmapped	6	syntenic	D6Mit182.1
D6Mit185	D6Mit185		MGI:93617	MGI:705463	ATCATCACCACTGGTGTGTTG	ATAAACCAGCCTCAGAACTCATG				isPCR	unmapped	6	27	D6Mit185
D6Mit190	D6Mit190		MGI:93623	MGI:705634	ATACAGAGGCCAGTGCGTG	CGCTCTCGAATGAGTACGTG				isPCR	unmapped	6	37	D6Mit190
D6Mit220	D6Mit220		MGI:93655	MGI:700368	AGACATAATGACGGTGTGGTTG	CCAAAACCTTCTGATTCCCA				isPCR	unmapped	6	63.9	D6Mit220
D6Mit239	D6Mit239		MGI:100355	MGI:706168	GTTGATTGTTGTTGGTGGTAGG	CTCCTTCCTCCCTCTCAACC				isPCR	unmapped	6	15.9	D6Mit239
D6Mit241	D6Mit241		MGI:100353	MGI:704745	TTGCCCTTTAACAATCTGGC	TCATCTTATGACATGCACTTTTCC				isPCR	unmapped	6	28	D6Mit241
D6Mit242	D6Mit242		MGI:100352	MGI:704742	AATTAGTGCACCTGAAGTATTTTCG	GGAGAGACAGACTGGGAAAGC				isPCR	unmapped	6	30	D6Mit242
D6Mit251	D6Mit251		MGI:100343	MGI:702971	TAACATTTTTGGAGACACATACGC	GTTTGTCAGCCTTAGATCTACCTACC				isPcr	unmapped	6	46.5	D6Mit251
D6Mit252	D6Mit252		MGI:100342	MGI:701870	CATCAACCCTCCCAGGATC	TCCCCGAAATTTACAGGTACC				isPcr	unmapped	6	49.5	D6Mit252
D6Mit257	D6Mit257		MGI:100337	MGI:702969	AGTAGATATAACAAGAGCCAGTGTGTG	TTGAATCCAAAATTTTGATCATATAC				isPCR	unmapped	6	62.5	D6Mit257
D6Mit258	D6Mit258		MGI:100336	MGI:702976	TACACCTTTACCCACCGAGC	GGTTTGAGTACATACCACACCTAGG				isPCR	unmapped	6	65.5	D6Mit258
D6Mit270	D6Mit270		MGI:100324	MGI:706536	TCACTAGGAAACCCACCCTG	TGATGGCACTTAGTATGCATTACC				isPCR	unmapped	6	15.7	D6Mit270
D6Mit278	D6Mit278		MGI:100316	MGI:706528	ACCCTGGCAAGATAATAACAGG	CTGTGGGTTTGACCCAGACT				isPCR	unmapped	6	28	D6Mit278
D6Mit281	D6Mit281		MGI:100313	MGI:703592	CAGAATACACACACACATGCATG	TGACAAAGGGCCTGAAATTT				isPCR	unmapped	6	34.3	D6Mit281
D6Mit295	D6Mit295		MGI:100299	MGI:701726	TGGTACAGGGCACTGTCATC	GACCCAATCTGCAAATATTATGC				isPCR	unmapped	6	73.6	D6Mit295
D6Mit301	D6Mit301		MGI:100293	MGI:705050	AGACTTAAAAAACAGATTCCAGTGTG	AGATGCCCCTTTTGGACTCT				isPCR	unmapped	6	64	D6Mit301
D6Mit310	D6Mit310		MGI:102113	MGI:707436	GCAATTCCTTGGGGAAAATT	GTCAAAAGTTAACAGTCATCGAGTG				isPCR	unmapped	6	15.7	D6Mit310
D6Mit312	D6Mit312.1		MGI:102115	MGI:705562	CATGCCTGAGGTTCGACTCT	GGAGTGCTATAGAATTTTTTCTGGG				isPCR	unmapped	6	19	D6Mit312
D6Mit32	D6Mit32		MGI:93664	MGI:706336	CAGATAATTGTAGATTGCCCAGC	CCCCTAGACTCCCAAAGGGTA				isPCR	unmapped	6	38.5	D6Mit32
D6Mit320	D6Mit320		MGI:102123	MGI:705856	TCTTAAAGATAGTATCATGCATGTGTG	CTGGAGACAGAACTATTTCCTTCC				isPCR	unmapped	6	32.5	D6Mit320
D6Mit329	D6Mit329		MGI:102132	MGI:702206	AAAGCACACATACCCTGGAG	TTCCTATCTAGAACCCACCTACAC				isPCR	unmapped	6	50.5	D6Mit329
D6Mit339.2	D6Mit339.2		MGI:3614131	MGI:702968	ATTGTGGAGGTGAGAGGACAAC	AGATGGCTCAGAAAGTCAAGGT				isPcr	unmapped	6	syntenic	D6Mit339.2
D6Mit353	D6Mit353		MGI:105527	MGI:707023	TCTATGCACCTGTGTCTTTTGC	TTTCCTTCTACTAAAACAAAACTTGTG				isPCR	unmapped	6	26.1	D6Mit353
D6Mit353.1	D6Mit353.1		MGI:3614132	MGI:706729	AGCTGAGTTGGTCTCCAGAGTAG	GGTGCATAGATATGTACAAAAGCC				isPcr	unmapped	6	syntenic	D6Mit353.1
D6Mit359	D6Mit359		MGI:105521	MGI:707029	GACATATCAAGATTCAGGC	TTCAGCTATATTTAAACTTCTGTTTTA				isPCR	unmapped	6	32.5	D6Mit359
D6Mit364	D6Mit364		MGI:105516	MGI:701639	TAGACCTTGTCTCAAATGTATGTGTG	CCCCTGATGCTGTAGGTGTT				isPCR	unmapped	6	37	D6Mit364
D6Mit371	D6Mit371.4		MGI:105509	MGI:702889	GTGCACACATATGGGTTTGTTT	AAGGGACAAGATCTGGCTAAGG				isPCR	unmapped	6	73	D6Mit371
D6Mit371	D6Mit371		MGI:105509	MGI:703475	GAACCTCCCCTTTGTGAGTG	ACCTGTCCCATAAACAAACCC				isPCR	unmapped	6	73	D6Mit371
D6Mit386	D6Mit386		MGI:107110	MGI:704841	AAACATTCAACGATGCCCTC	TTCTCAACATGTCAATAACACTGTG				isPCR	unmapped	6	35.2	D6Mit386
D6Mit39	D6Mit39		MGI:93670	MGI:706334	CTTGACTTCCCCAGGTATGTG	TTGACTGCCTTTTTTTTTTGG				isPCR	unmapped	6	46.3	D6Mit39
D6Mit46	D6Mit46		MGI:93677	MGI:703672	TTAGAACTGTGAAGAGGGTCAGC	TGGCTGTTTGTTAATTCGACC				isPCR	unmapped	6	7.3	D6Mit46
D6Mit48	D6Mit48.3		MGI:93679	MGI:700665	CACTCTGTGTAAGGAGCTTTTCTG	GCGTCATATGATAATTCGCG				isPCR	unmapped	6	7.5	D6Mit48
D6Mit70	D6Mit70-pA	D6Mit70-pB	MGI:93702	MGI:1328373	CAACCACGGACAGCAACCCATTATTTCTTG	CCAAGCCTGATGACCTGAATTCATCTCTG				isPCR	unmapped	6	34.78	D6Mit70
D6Mit8.2	D6Mit8.2		MGI:3614136	MGI:701129	TTTCTGACTAACACATCACACCAGT	GTGCTGTCACAGAAAACAGTCTGTAG				isPcr	unmapped	6	syntenic	D6Mit8.2
D6Mit88	D6Mit88.1		MGI:93721	MGI:700721	CATCCTTAGGCTGCAGAAGAG	CAATGCAGGGTCACTTATTCTCTTC				isPCR	unmapped	6	3.5	D6Mit88
D6Mit9	D6Mit9		MGI:93723	MGI:702215	GTCTGTTTTGGCATATGGCA	TCTGGGTANCCAACCATGTT				isPcr	unmapped	6	36.5	D6Mit9
D6Mit92.4	D6Mit92.4		MGI:3614138	MGI:707401	GATTGCAAGTGCCAGGTGAT	CTCAATTTCCCTAAACCTTGACAGA				isPcr	unmapped	6	syntenic	D6Mit92.4
D7Mit1	D7Mit1		MGI:93914	MGI:702615	GTCCCAGTGTGTATATATAATCCAG	GGATTATACACACAGATGTTGGG				isPCR	unmapped	n/a	n/a	n/a
D7Mit1002	D16Mit118		MGI:90475	MGI:702077	AAGTTTAGGAGTGCCCAGCA	TCACATTGTGCACACACCC				isPCR	unmapped	7	syntenic	D7Mit1002
D7Mit126	D7Mit126		MGI:93943	MGI:706076	AGTGCTGGAATTAGTTATATAACACCA	AAGGGAAATGTCTCTCTCTCCC				isPCR	unmapped	7	50	D7Mit126
D7Mit131	D7Mit131		MGI:93949	MGI:704286	GCCATGGAAACTACTTTGAAGG	ATTTGCATGAAGTTCCTGCC				isPCR	unmapped	7	51	D7Mit131
D7Mit136	D7Mit136		MGI:93954	MGI:704293	TCTCTGTGCCACACTCGC	AAGTATATGGGCTTCCTCTGAGG				isPCR	unmapped	7	63.1	D7Mit136
D7Mit151	D7Mit151		MGI:93971	MGI:700718	AGGCCCCTACCCTTCTTTTT	CTTCATGAATACACACACAAGTATGC				isPcr	unmapped	7	65.5	D7Mit151
D7Mit162	D7Mit162		MGI:93983	MGI:706470	CACAAATGCACCCACATATAGG	GGCGTACACCTGTGGGAC				isPCR	unmapped	7	37	D7Mit162
D7Mit169	D7Mit169		MGI:93990	MGI:706481	CCTCTGAAGGCATGGAGAAG	GGCTTCATCAGGAAACGAGA				isPCR	unmapped	7	4	D7Mit169
D7Mit171	D7Mit171		MGI:93993	MGI:704691	TACTAACCTGCCCCTATGCG	TATGCATGAGTGAGTGCAAGTG				isPCR	unmapped	7	48	D7Mit171
D7Mit18	D7Mit18		MGI:94001	MGI:703788	GGGAGCCCAGCTTCTACTG	TCCTAACACCCTTCCTGGTG				isPcr	unmapped	7	26.8	D7Mit18
D7Mit189	D7Mit189		MGI:94011	MGI:701279	CCTGGTGAGTAGAGAGGGAGG	AGGAACATATGTGCACATGCA				isPCR	unmapped	7	72.4	D7Mit189
D7Mit19	D7Mit19.1		MGI:94012	MGI:703716	CCGTAACAGAGACTCTTACATGGT	GCCTGGATCTGACTCTTGGA				isPCR	unmapped	7	44	D7Mit19
D7Mit199	D7Mit199		MGI:94022	MGI:707064	TTGTTTTTTATAAGACTTGCCTTGG	CATTTGATCCAAAGGGGTTG				isPCR	unmapped	7	27.8	D7Mit199
D7Mit20	D103		MGI:94023	MGI:635	GTGTAGCAATGGTGTCGGTG	AAGCCTGCCTCCAGATGTAA				isPCR	unmapped	7	5.5	D7Mit20
D7Mit20	D7Mit20		MGI:94023	MGI:704957	GTGTAGCAATGGTGTCGGTG	AAGCCTGCCTCCAGATGTAA				isPcr	unmapped	7	5.5	D7Mit20
D7Mit20	D7Mit20.1		MGI:94023	MGI:706072	AGCTCAGACAGCTGAGTAAGTCC	CTGGTGTGTGTTCAGTCACACTT				isPcr	unmapped	7	5.5	D7Mit20
D7Mit211	D7Mit211		MGI:94036	MGI:704542	CAATGAGAAACTATAGAATGCTCAGC	TCATCTACTCGCTTTGGCCT				isPCR	unmapped	7	27.8	D7Mit211
D7Mit235	D7Mit235		MGI:100278	MGI:700933	CCCATGGACCCTAAGGAAAT	AGATGCAGGTTCACATCAGAA				isPCR	unmapped	7	49.9	D7Mit235
D7Mit24	D7Mit24.1		MGI:94051	MGI:705831	AGCTCAGACAGCTGAGTAAGTCC	CTGGTGTGTGTTCAGTCACACTT				isPcr	unmapped	7	5.5	D7Mit24
D7Mit24	D7Mit24		MGI:94051	MGI:707507	GTGTAGCAATGGTGTCGGTG	AGTCTCGTAAGACCTCCACTGC				isPcr	unmapped	7	5.5	D7Mit24
D7Mit245	D7Mit245		MGI:100268	MGI:703122	TTTTGGAGGACGGGTGTAAG	CTCACCCCAGCAATACCTGT				isPCR	unmapped	7	8	D7Mit245
D7Mit246	D7Mit246		MGI:100267	MGI:703121	CACACAAAGCCGCAGTTCTA	TTGTTACGTGGCCTAGATTGG				isPCR	unmapped	7	15	D7Mit246
D7Mit248	D7Mit248		MGI:100265	MGI:706523	AATCAGGCAACTCAGGCACT	TCCTTAGGTCTCCAGTGAAAGC				isPCR	unmapped	7	27.8	D7Mit248
D7Mit253.1	D7Mit253.1		MGI:3614146	MGI:704146	ACAGAAAAGGGTGCTTACAACATAG	AACCTTGTTGTAGCCATGGTAGG				isPcr	unmapped	7	syntenic	D7Mit253.1
D7Mit26	D7Mit26		MGI:94053	MGI:707505	TTGCTCCTCCAATCCAGC	CCCAGACCCAGACAGATGTT				isPcr	unmapped	7	23	D7Mit26
D7Mit263	D7Mit263		MGI:100250	MGI:707096	CCCCCAGAGATTGTGCAC	TCTGCATATATTTGACATGTGTGC				isPcr	unmapped	7	2.5	D7Mit263
D7Mit278	D7Mit278		MGI:100235	MGI:701307	GATCCCCCCTCCACATTC	ACTCAGACTGCTACAGCCAGTG				isPcr	unmapped	7	27.8	D7Mit278
D7Mit279	D7Mit279		MGI:100234	MGI:701308	AGCAACATCTCACCCTATACCC	TAGTCCTACCAACAGCCTGTCA				isPCR	unmapped	7	37	D7Mit279
D7Mit282	D7Mit282		MGI:100231	MGI:703520	CAAGACATTTTAAAATTAACTGGGG	CCTTGGATCTGCAAATGACA				isPCR	unmapped	7	53.5	D7Mit282
D7Mit299	D7Mit299.1		MGI:100214	MGI:702054	GATCCCCCCAAGACTTCATT	ATTGGTCTACTGTCATCAATGAGC				isPCR	unmapped	7	40	D7Mit299
D7Mit310	D7Mit310		MGI:102149	MGI:702882	GGGCTCGAAAGACACAGAAA	ATGTAGTGTTAACGGAACATAACTGG				isPCR	unmapped	7	18	D7Mit310
D7Mit317	D7Mit317		MGI:102157	MGI:702879	ATGTCTCCTTGACATTGGGC	TCTTGTAATCTCACATCTAAGTGTGTG				isPCR	unmapped	7	37	D7Mit317
D7Mit320	D7Mit320		MGI:102159	MGI:700705	TTCATTGGTTTGACTGGGAG	ACAAGACATTTTGAGTAGGAACTCG				isPCR	unmapped	7	46.4	D7Mit320
D7Mit322	D7Mit322		MGI:102165	MGI:702047	GCTGCTCTTGGCAGGTAAGT	CCACCCAATCTATTTGAGTATTCA				isPCR	unmapped	7	50.3	D7Mit322
D7Mit326	D7Mit326		MGI:102163	MGI:702042	ATGCAATGTAGAGTTTGATGAGATG	TAAAAATGTGTCATTCAGCATTTG				isPCR	unmapped	7	50	D7Mit326
D7Mit32b	D7Mit32		MGI:3620849	MGI:701708	CAGAAGGTGTGGGGGACTAA	GCAGACATTCCTACAAGTGGC				isPCR	unmapped	7	syntenic	D7Mit32b
D7Mit34	D7Mit34		MGI:94061	MGI:701709	TGGTTGTGGATTTCTGTACAGG	TTTCAAAATCGTGTCATTTTGC				isPCR	unmapped	7	49.96	D7Mit34
D7Mit357	D7Mit357		MGI:105471	MGI:702486	CCTTCCTCAGACACACAGCA	GAGTCACTGTGGTGCTAAGCC				isPCR	unmapped	7	53.3	D7Mit357
D7Mit362	D7Mit362		MGI:105466	MGI:700285	GGGGTTAGACCAGTTGACCC	TTTGCATATGTGTGTATACATGTGG				isPCR	unmapped	7	72.4	D7Mit362
D7Mit366	D7Mit366		MGI:107118	MGI:2150399	ACCAACCAGTTTTCCCTGG	GAGATTGGGGCAGAAATCAA				isPCR	unmapped	7	37	D7Mit366
D7Mit38	D7Mit38		MGI:94065	MGI:707455	GTGTATGATGGAATGTGGAGACA	ACAGCCCCAGGAAAGCATT				isPCR	unmapped	7	50.7	D7Mit38
D7Mit47	D7Mit47		MGI:94073	MGI:703941	GAACAGCACAAAAGGGGAAA	TTCGTAACACTGGGAGGACC				isPCR	unmapped	7	72.4	D7Mit47
D7Mit5	D7Mit5		MGI:94074	MGI:702611	TCGTGTCAAATTGCTTATGC	ACTGTGTGTGCCTGTGTTTG				isPCR	unmapped	7	46.4	D7Mit5
D7Mit55	D7Mit55		MGI:94078	MGI:705713	AACCCCAATGAGTCAATCATG	CAAGACATAGCAGACGACTGTACC				isPCR	unmapped	7	15	D7Mit55
D7Mit7	D7Mit7		MGI:94091	MGI:702609	ACTCAAAGGTTGTCCTGGCA	TGGTAGTGGTGGCTNCGGTG				isPcr	unmapped	7	54	D7Mit7
D7Mit71	D7Mit71		MGI:94093	MGI:706201	CCACCTGGAATACATGTAACCC	TAAGATCCAAGAGATGGGTTAAGC				isPCR	unmapped	7	65.2	D7Mit71
D7Mit8	D7Mit8		MGI:94102	MGI:702608	TTGGCCTTTATAGGCACCTG	TAAGGCACCATGATATGGCA				isPCR	unmapped	7	60	D7Mit8
D7Mit87	D7Mit87		MGI:94110	MGI:702676	AACCCAGAACAGACACTGGG	ATTTGCCAATGGAGGGCT				isPCR	unmapped	7	27.8	D7Mit87
D7Mit9	D7Mit9		MGI:94113	MGI:702607	GACAGGTGGTTCTTTAATAATCCG	GGAGCTTTAAAGGACAATTTTCA				isPCR	unmapped	7	60	D7Mit9
D8Mit1	D8Mit1		MGI:94276	MGI:707597	TTTTGCTGTCTAGGTCCTGACTC	CAGCCTCATTAGTAAGGGACCTT				isPCR	unmapped	n/a	n/a	n/a
D8Mit103	D8Mit103		MGI:94280	MGI:701664	GGTATCCATGTCCTAGTGCATG	TGGGCTACACATAGGGAAGC				isPCR	unmapped	8	37	D8Mit103
D8Mit107	D8Mit107		MGI:94284	MGI:704391	CCATAAAGGTCTTAGGATGGAA	CTAAAATGGGAGACCTCAATTG				isPCR	unmapped	8	43	D8Mit107
D8Mit127	D8Mit127		MGI:94306	MGI:705134	GCTCTACCATATATCTAGTGATCTTCG	TCTTTAAACTGTATCATTTCATCAGAA				isPCR	unmapped	8	29	D8Mit127
D8Mit14	D8Mit14		MGI:94320	MGI:704914	TTTTCACACTCACGTGTGCG	GTCTCTCCTTCCTGGCGCTG				isPCR	unmapped	8	67	D8Mit14
D8Mit144	D8Mit144		MGI:94325	MGI:701212	ACACACTTACATACACACACAGATACC	CCTGCCTCCTCCCTTTAAAC				isPcr	unmapped	8	31	D8Mit144
D8Mit145	D8Mit145.1		MGI:94326	MGI:704713	AGTGTTGTGCACCCTCACAG	CCAGAACAAGCCAGTCCACT				isPCR	unmapped	8	33	D8Mit145
D8Mit15	D8Mit15		MGI:94331	MGI:704915	AGCTGAATTTGAGCTAGTCG	AAGCTTACGGTTTAATCCCC				isPCR	unmapped	8	45	D8Mit15
D8Mit16	D8Mit16		MGI:94342	MGI:704912	GCCTGGATTTCCTCATTGAA	AGTTGGTTATCCCTGAAAATATACA				isPCR	unmapped	8	8	D8Mit16
D8Mit179.1	D8Mit179.1		MGI:3614150	MGI:705617	ACCTATCCCTCTTTGATGACC	AAAGCAGAAGTTAGATTGACCCAC				isPcr	unmapped	8	syntenic	D8Mit179.1
D8Mit184	D8Mit184		MGI:94368	MGI:700826	GTTTTTCTCAGAAGAATGCAATATACC	TGAGAAGAATGAGGAATTTGTCC				isPCR	unmapped	8	47	D8Mit184
D8Mit20	D8Mit20		MGI:94384	MGI:702720	ATTAAAACTTGAGGGCAG	TGATGCCTGGTAANTAGCTTTACT				isPcr	unmapped	8	8	D8Mit20
D8Mit204	D8Mit204		MGI:100206	MGI:705307	GAACAGAACTTATGGAATGAACACA	CAGCATTGTTGGCCACAG				isPCR	unmapped	8	20	D8Mit204
D8Mit206	D8Mit206		MGI:100204	MGI:705309	TGCTGCATGTAGCCTCTCC	ACTGTCATTTTTGTCAAAGACAGC				isPCR	unmapped	8	33	D8Mit206
D8Mit237	D8Mit237a	D8Mit237b	MGI:100173	MGI:707515	CTGAGGAAAAACACCTTTTTGG	GCACGCACACGCATGTAC				isPcr	unmapped	8	38.1	D8Mit237a
D8Mit24	D8Mit24		MGI:94390	MGI:702724	ACCTCCACACGATTACAGTGG	ATGATGTCACCAGCAACTTCC				isPCR	unmapped	8	18	D8Mit24
D8Mit25	D8Mit25		MGI:94391	MGI:702564	TCAGACTAATGTCCAGTAGCAAGC	ATTGCATGTCCATGTCTGGA				isPCR	unmapped	8	32	D8Mit25
D8Mit259	D8Mit259		MGI:100151	MGI:703137	GTGCCTCTGTGGACACCC	TGGGCTGCCTTATCAATCTT				isPcr	unmapped	8	22.5	D8Mit259
D8Mit277	D8Mit277		MGI:100133	MGI:703547	GGAAAACAGGTATGCGCG	TCTGACACTCGTGCGCTC				isPCR	unmapped	8	67	D8Mit277
D8Mit280	D8Mit280		MGI:100130	MGI:707229	CATGCAATTCCAATGTCAGTG	TAGCACTCAATCAAACCCCC				isPCR	unmapped	8	72	D8Mit280
D8Mit287	D8Mit287		MGI:102176	MGI:707226	TTCATTCGTCCACAAGCACA	AAGTATTTATAGACAGGGATCTGTGTG				isPcr	unmapped	8	8	D8Mit287
D8Mit288	D8Mit288		MGI:102177	MGI:707209	CCATAAGTGTCTACAGCCAAACC	ACAAACAAAGGTGCAAGCG				isPcr	unmapped	8	8	D8Mit288
D8Mit295	D8Mit295		MGI:102183	MGI:704401	AGTTATTAGGAAAACAGAGTCACACA	GAAAAAGTGATTTTCCTTCTCTTCC				isPCR	unmapped	8	22.5	D8Mit295
D8Mit299	D8Mit299		MGI:102189	MGI:706507	ACACATGTGCACAAATTTCCA	ATTTTTCTGCTTCATTCTGTATCTTG				isPCR	unmapped	8	31	D8Mit299
D8Mit30	D8Mit30		MGI:94397	MGI:705109	GGAGAGTGGTTCCACCACC	ATGTTTGCCCAGCATGTACA				isPCR	unmapped	8	33	D8Mit30
D8Mit302	D8Mit302		MGI:102191	MGI:706604	ATCTGGGCTCTATAAGACTCATGA	TGGATAAAGCCAAGTATGACACA				isPCR	unmapped	8	33	D8Mit302
D8Mit314	D8Mit314		MGI:102205	MGI:700981	ACCATGTGGCTATTACTCAGAGC	CTTTCTTCTTTAATGCCTCAGACA				isPCR	unmapped	8	54	D8Mit314
D8Mit319	D8Mit319		MGI:102209	MGI:701105	TATCCTGTTGAGAATCAAGGCA	AGAATCAGGACGTGATGATGG				isPCR	unmapped	8	58	D8Mit319
D8Mit325	D8Mit325		MGI:102215	MGI:702614	GCAATTGCATATGTATCTCTCTCTG	AAAACACTGCACTCTACCTCTGG				isPCR	unmapped	8	71	D8Mit325
D8Mit334	D8Mit334		MGI:105463	MGI:704429	TTTCGGTTTTACAGGCACG	TTTCAAAGAAAAAATGTGAGTGTACC				isPCR	unmapped	8	6	D8Mit334
D8Mit339	D8Mit339		MGI:105458	MGI:704442	ACCTATGGTACACACACATCGC	CAAACATTTTTAGGCATTTAGATCC				isPCR	unmapped	8	23	D8Mit339
D8Mit34	D8Mit34		MGI:94401	MGI:703049	TCCAGATATCAGGAAAGTGATTTG	TTGGCTCGGGACTCTCAG				isPCR	unmapped	8	53	D8Mit34
D8Mit354	D8Mit354		MGI:105443	MGI:700428	ACCTACATAGCAAAAACCTACCTACC	TTCATTTTATTGATAGTAATTCCTTCC				isPCR	unmapped	8	62	D8Mit354
D8Mit354.2	D8Mit354.2		MGI:3614154	MGI:707082	TACCTTCTAGGCACCATGGTT	CCTTTTACATGTTCATCCCAGTAG				isPcr	unmapped	8	syntenic	D8Mit354.2
D8Mit359	D8Mit359.1		MGI:107128	MGI:701110	ATGCCTGAGGTCGACTCTAGAG	GAGCAATAGAGGAAGATACTTGATCC				isPCR	unmapped	8	34	D8Mit359
D8Mit36	D8Mit36		MGI:94403	MGI:703053	TTGCCATGAATCTTTATGTACCC	GCAGTGAACTGGATCCCAGT				isPCR	unmapped	8	67	D8Mit36
D8Mit41	D8Mit41		MGI:94406	MGI:706325	AGATGTCAATGATCAGGGCC	TCTGAGACGAAATCTGCTCTACC				isPcr	unmapped	8	41	D8Mit41
D8Mit48	D8Mit48		MGI:94413	MGI:706324	TAGGCTACATGAGCCTTGCC	ACATGATGGAAGATGAGAATTGG				isPCR	unmapped	8	59	D8Mit48
D8Mit5	D8Mit5		MGI:94415	MGI:707601	TCCCTTTTCCCTGTGCTATG	GCCGTTCATTTAACCCTTCA				isPCR	unmapped	8	25	D8Mit5
D8Mit73	D8Mit73		MGI:94441	MGI:700547	GGGAGGTAAGAGGGTAGTAGAAGC	CTCTCTCCCCATACCCTGC				isPCR	unmapped	8	33	D8Mit73
D8Mit85	D8Mit85		MGI:94454	MGI:705886	TAGTGGATGGATATGCATTCATG	AACACCCTCTGGCATCTTTG				isPCR	unmapped	8	47	D8Mit85
D9Mit1014	D17Mit182		MGI:100870	MGI:701901	CACTGGGTGGCTTTCATTTT	TTTGTAAGAGAACAGACTTGCTATCA				isPCR	unmapped	17	34.8	D17Mit182
D9Mit11	D9Mit11		MGI:94617	MGI:707283	GCCTTCATGTGTACCTGAATGCAC	GGCTCTGTAATCACTGAAGCTGGT				isPCR	unmapped	9	48	D9Mit11
D9Mit116	D9Mit116		MGI:94623	MGI:707458	CTGTTAAGTTCAGTCTAGGCTTTGC	AGAAGGCTGAAGTTCATCATCC				isPCR	unmapped	9	61	D9Mit116
D9Mit145	D9Mit145		MGI:94653	MGI:707232	GAGGATCCCTTCACACATATGC	GTTTGCTCCATCCACCAAAT				isPcr	unmapped	9	35	D9Mit145
D9Mit157	D9Mit157.2		MGI:94666	MGI:701458	GGGTTTTGTGTTGAGACTTATTGC	GTAAGTAAGAGCAGAGGCCATAGCTG				isPCR	unmapped	9	49	D9Mit157
D9Mit16	D9Mit16		MGI:94669	MGI:706322	TCTGTGCCTCTTGGAGTGTG	AGGATTGGGGCTTTGTTCTT				isPCR	unmapped	9	61	D9Mit16
D9Mit17	D9Mit17		MGI:94680	MGI:706638	GCCAAGGCTGTCTCTTAGCC	GAGAGAAGGGTTCTGGGCAG				isPcr	unmapped	9	62	D9Mit17
D9Mit20	D9Mit20		MGI:94713	MGI:707770	CCCTTGCAGCCCATCGCCTA	TAGACACATAGCTGGAGGTTTTCT				isPCR	unmapped	9	61	D9Mit20
D9Mit211	D9Mit211		MGI:100112	MGI:1347824	TTCCATGAGCCTTGCAGAC	TATTTAACAGCCCTCCCCAC				isPCR	unmapped	9	49	D9Mit211
D9Mit211.3	D9Mit211.3		MGI:3614175	MGI:1347826	TGTAAAAACCCACCATGAGCT	CTCACACAGAACATTCCATCAGTTC				isPcr	unmapped	9	syntenic	D9Mit211.3
D9Mit225	D9Mit225		MGI:100098	MGI:705457	ATGGGAGTGCTCCAGGAAG	AGTAGGAAGAAAGAAGGGGGC				isPCR	unmapped	9	17	D9Mit225
D9Mit235	D9Mit235		MGI:100088	MGI:707274	ACCAAGTAGTGAGAGGAAATGAGG	GTTGTCCTCTGGCCTCACAT				isPCR	unmapped	9	42	D9Mit235
D9Mit243.2	D9Mit243.2		MGI:3614181	MGI:702164	TTCCCAGACAATGAAAGAGAGTG	CTCCAGAGAGCATTATTTTACTCC				isPcr	unmapped	9	syntenic	D9Mit243.2
D9Mit249	D9Mit249		MGI:100074	MGI:702379	AAGCCCTCTTAGAAGTAGTGTGTATG	AGCCATGAACTAACTTACATGTATCA				isPCR	unmapped	9	4	D9Mit249
D9Mit25.2	D9Mit25.2		MGI:3614184	MGI:700334	AAATGAATTTGGCCTGGTGG	TTGGAGATAGGGTTAACTCTAGCC				isPcr	unmapped	9	syntenic	D9Mit25.2
D9Mit255b	D9Mit255	D9Mit255a	MGI:3641594	MGI:704150	GCCACGAGAAATCACCACAT	GCTGTGTGTGTGAGCATGC				isPCR	unmapped	9	syntenic	D9Mit255b
D9Mit258	D9Mit258		MGI:100065	MGI:704153	GTGGCGTTAACTCTAGCCTCC	CTGTGCTTTTTCGGTATAAATGC				isPCR	unmapped	9	29	D9Mit258
D9Mit271.2	D9Mit271.2		MGI:3623320	MGI:706495	CTGTCTGCCTGACTACTTGGTTT	GCCGTATGAACACTGAACACAG				isPCR	unmapped	9	syntenic	D9Mit271.2
D9Mit283	D9Mit283.1		MGI:100040	MGI:707459	CATGCCTGAGGTTCGACTCT	GTCAATGCCATTTTACAAGCTACAG				isPCR	unmapped	9	6	D9Mit283
D9Mit284	D9Mit284		MGI:100039	MGI:1347942	GACCCTTATTTCCAGTCCTGC	TGAATAAAACTGCCATTGTGTACA				isPCR	unmapped	9	11	D9Mit284
D9Mit299	D9Mit299		MGI:102223	MGI:706709	CCATTTAAGGGCATAAGAAACC	TGGCTTCCTTAAGGCTGAGA				isPCR	unmapped	9	28	D9Mit299
D9Mit339	D9Mit339		MGI:105771	MGI:702850	GGCTTGAACTCCTTCACTGC	CCTCCCATTGCACTCAGG				isPCR	unmapped	9	39	D9Mit339
D9Mit345	D9Mit345		MGI:105777	MGI:701055	CAGACAGAGTGAGGAACATAGTCG	TGATGTCCAAGATCTTCTTCTAACC				isPCR	unmapped	9	49	D9Mit345
D9Mit35.2	D9Mit35.2		MGI:3614196	MGI:703355	TTTTCAAAGCAGAAGGCACC	ACAAAGTACACAGAGAGCCAGG				isPcr	unmapped	9	syntenic	D9Mit35.2
D9Mit353	D9Mit353		MGI:107135	MGI:706837	TGTTTTGAGATCTGTGAATGTTACC	GAAGAGAACCAACTTCCCACC				isPCR	unmapped	9	35	D9Mit353
D9Mit358	D9Mit358		MGI:107140	MGI:706832	CCTAAGGTAATTAAATGTGTAAGACCA	TTCTGTTTCACTATACATGTGCACA				isPCR	unmapped	9	56	D9Mit358
D9Mit59	D9Mit59		MGI:94750	MGI:706356	CAGCCAGAGGCAGTGTTTTA	TAGGCTTCAGCTGCAACTCA				isPcr	unmapped	9	1	D9Mit59
D9Mit6	D9Mit6		MGI:94751	MGI:706694	GTACCCGGGGATCTGGTG	CTGAGAAATGGAAACGTTGTTG				isPcr	unmapped	9	31	D9Mit6
D9Mit63	D9Mit63		MGI:94755	MGI:700585	TTTTCCCTTTTTAAACAGGTTCC	GTTTCCATAAAAGGTCCAATGC				isPCR	unmapped	9	7	D9Mit63
D9Mit9	D9Mit9		MGI:94782	MGI:702528	TACCCGGGGATCTTCTTTCT	AGAGCTTTCCCGCTACACAA				isPcr	unmapped	9	48	D9Mit9
DXMit1.1	DXMit1		MGI:95058	MGI:701792	CAAGCAACCGAGGAAGACAT	CAGGATGCTAATCACCCTGC				isPCR	unmapped	20	29.01	DXMit1.1
DXMit1.2	DXMit1-pA	DXMit1-pB	MGI:3620582	MGI:146	CAGCAAGCAACCGAGGAAGACATCC	CTAGCCAGGATGCTAATCACCCTGC				isPCR	unmapped	20	syntenic	DXMit1.2
DXMit1003	D5Mit342.2		MGI:3614092	MGI:702584	GTGTGCGTATGCATTTTGTATCAAC	TCTGCAAGGGAAAAATGAGT				isPCR	unmapped	20	syntenic	DXMit1003
DXMit11	DXMit11		MGI:95070	MGI:701303	CCCTTGTAAGTCCTCTGACTGC	CAAAAGTACGCTGCCGTGTA				isPCR	unmapped	20	63.4	DXMit11
DXMit127	DXMit127		MGI:100021	MGI:700735	GACAGACAGACAGACAGACAGACA	CCCTTACCTCAACTTCTTTTTAATG				isPCR	unmapped	20	20	DXMit127
DXMit13	DXMit13.2		MGI:95085	MGI:707616	CCAACCAATTCCAAGGTAGTAGG	TACCTGAAACCCCATCTAGCAAT				isPCR	unmapped	20	60	DXMit13
DXMit135	DXMit135		MGI:100013	MGI:704015	ACACTCCTACAAGCCTATAATCACG	TTTTCAAGTTATGTTTAAAAATGTGTG				isPCR	unmapped	20	69	DXMit135
DXMit14	DXMit14		MGI:95086	MGI:703869	TTTAACCTGTATGCCCCAGC	CTCCTTTGGTAAAGAATGTGCC				isPCR	unmapped	20	35	DXMit14
DXMit143	DXMit143		MGI:100005	MGI:703919	AGGAAATGTGTGTACTCTGTATCTATG	TGCTGCCTTGGCATGTATAG				isPcr	unmapped	20	26	DXMit143
DXMit144	DXMit144		MGI:100004	MGI:706560	CCACGAAGCACAGAAGCAG	GAACATTTTAACATGCAATCTGTACC				isPCR	unmapped	20	20	DXMit144
DXMit16	DXMit16		MGI:95088	MGI:701306	CTGCAATGCCTGCTGTTTTA	CCGGAGTACAAAGGGAGTCA				isPCR	unmapped	20	37	DXMit16
DXMit167	DXMit167		MGI:99981	MGI:700332	GAATAAGACCAAGGGGGAGC	AAGTGGGTGGGGTATGGTC				isPCR	unmapped	20	17.5	DXMit167
DXMit17	DXMit17		MGI:95089	MGI:703868	CCTGTTTGGGCACCTAGATT	TAATAACCCATGTTTTCTGTGGG				isPCR	unmapped	20	37	DXMit17
DXMit18	DXMit18		MGI:95090	MGI:706369	CACCTCGCCCACAAAGAC	CACTGGCCAAGCATAGGG				isPCR	unmapped	20	42.6	DXMit18
DXMit180	DXMit180		MGI:99968	MGI:706497	AACTTCAACAGGAAACTGGCA	CACTACCAAAAGAAGCAGACAGG				isPCR	unmapped	20	65.4	DXMit180
DXMit182	DXMit182		MGI:99966	MGI:704980	CCGAGTTAACTACTTCTAAGCCTTG	AGTCCCACCCACCACATCTA				isPCR	unmapped	20	70	DXMit182
DXMit183	DXMit183		MGI:99965	MGI:704979	CCTTCTCTCACGTGCATATATCC	AGAATTTGCTTTGCCACCAG				isPCR	unmapped	20	69	DXMit183
DXMit191	DXMit191		MGI:102453	MGI:703886	AACATGTAACATGTCACCACCC	AACACAAATAAGTCAGGACACTTCA				isPCR	unmapped	20	7.2	DXMit191
DXMit206	DXMit206		MGI:105899	MGI:707267	GGGTCACGTGGTAGTGGC	TCTCCCTGTGTCTTTTCATTCA				isPCR	unmapped	20	4.3	DXMit206
DXMit221	DXMit221		MGI:105914	MGI:701030	CAGTGGAGTGCTCAGCCATA	TGTCCTTTTTAATGATACCTTGAGC				isPCR	unmapped	20	67	DXMit221
DXMit231	DXMit231		MGI:107149	MGI:706671	ATGCTTTCTTATTTGCTTATGATGC	CACCATGGAACCTATTAATCTTCC				isPCR	unmapped	20	50.5	DXMit231
DXMit239	DXMit239		MGI:109109	MGI:701425	CTCTGCAAGAGTGAATACATGTG	CAACCACCCCATTTTCATTC				isPCR	unmapped	20	55	DXMit239
DXMit241	DXMit241		MGI:109111	MGI:706238	CCTTCAGTTCCCTTTACCTGG	AAAGAGATAAAGTGATGGCTGTCC				isPCR	unmapped	20	12	DXMit241
DXMit30	DXMit30		MGI:95103	MGI:707445	TTGCCACCCCTTTTGTTTAG	TGAGACACTGTGCCCAAAAA				isPCR	unmapped	20	73.3	DXMit30
DXMit39	DXMit39		MGI:95112	MGI:705525	GCTAGCATACGCGTGTCCG	ACAAAACAGGTTTACCATTTGG				isPCR	unmapped	20	48.8	DXMit39
DXMit61	DXMit61		MGI:95136	MGI:701273	CTGAAAGCCTCCACACACAA	AAATGATCTGAACAAGAAAATTTGC				isPcr	unmapped	20	30.9	DXMit61
DXMit62	DXMit62		MGI:95137	MGI:701272	GCAATTGTGATGTTGTAGTAAATATGG	ATAACTGAGGTCTGCGGGG				isPCR	unmapped	20	34.6	DXMit62
DXMit7	DXMit7		MGI:95145	MGI:701799	ATGGAACGCATTTTGGTTG	GTAATGCAAACAATGTGCTG				isPcr	unmapped	20	32	DXMit7
DXMit98	DXMit98		MGI:95175	MGI:703176	AGCAGGACTATGACTTGAATCTTC	ACACACCAGTTCGCACACAT				isPCR	unmapped	20	65.2	DXMit98
DXMit98	DXMit98-pA	DXMit98-pB	MGI:95175	MGI:7136	GAGAGCAGGACTATGACTTG	ACACACCAGTTCGCACACAT				isPCR	unmapped	20	65.2	DXMit98
