# Supplementary material for: A New Standard Genetic Map for the Laboratory Mouse
Source: Oxford University Press journal article supplement (doi:10.1534/genetics.109.105486), 2009-06-18
Supplement: tables4.pdf [file tables4.pdf]

**TABLE S4**  
**QTL affected by change in genetic map**

| Chr | Peak (cM)* | LOD score* | Peak Marker*     | Cross   | Phenotype          | Type of change         |
|-----|------------|------------|------------------|---------|--------------------|------------------------|
| 1   | 62.5       | 27.50      | <i>D1Mit14</i>   | B6xC3H  | Femoral vBMD       | LOD score              |
|     | 76.0       | 25.52      |                  |         |                    |                        |
| 2   | 60.2       | 1.75       | <i>D2Mit46</i>   | B6xCAST | Femoral vBMD       | Peak shape             |
|     | 55.0       | 1.53       | <i>D2Mit15</i>   |         |                    |                        |
| 2   | 79.4       | 4.04       | <i>D2Mit48</i>   | B6xC3H  | Femoral vBMD       | Peak shape             |
|     | 87.0       | 3.85       |                  |         |                    |                        |
| 4   | 63.6       | 2.64       | <i>D4Mit251</i>  | NZBxRF  | Femoral vBMD       | Peak shape             |
|     | 53.9       | 2.69       | <i>D4Mit26</i>   |         |                    |                        |
| 4   | 68.4       | 3.04       | <i>D4MIT308</i>  | B6x129  | Whole body aBMD    | Marker closest to peak |
|     | 73.2       | 2.98       | <i>D4MIT42</i>   |         |                    |                        |
| 4   | 71.6       | 2.45       | <i>D4Mit68</i>   | B6xCAST | Femoral vBMD       | Marker closest to peak |
|     | 77.9       | 2.37       | <i>D4Mit51</i>   |         |                    |                        |
| 8   | 71.6       | 2.42       | <i>D8Mit280</i>  | B6xC3H  | Ultimate load      | Marker closest to peak |
|     | 64.0       | 2.59       | <i>D8Mit167</i>  |         |                    |                        |
| 11  | 70.7       | 4.25       | <i>D11Mit126</i> | NZBxRF  | Ultimate load      | Marker closest to peak |
|     | 75.1       | 4.26       | <i>D11Mit48</i>  |         |                    |                        |
| 12  | 15.5       | 7.34       | <i>D12Mit285</i> | NZBxRF  | Ultimate load      | Marker closest to peak |
|     | 6.0        | 7.55       | <i>D12Mit182</i> |         |                    |                        |
| 12  | 30.2       | 3.52       | <i>D12Mit201</i> | NZBxRF  | Femoral vBMD       | Peak Shape             |
|     | 29.0       | 3.39       |                  |         |                    |                        |
| 14  | 4.7        | 1.92       | <i>D14Mit110</i> | B6xC3H  | Cortical thickness | LOD score**            |
| 14  | 56.2       | 3.66       | <i>D14Mit170</i> | B6xCAST | Femoral vBMD       | Peak Shape             |
|     | 63.0       | 3.17       |                  |         |                    |                        |
| 18  | 20.5       | 8.96       | <i>D18Mit120</i> | B6xC3H  | Ultimate load      | Marker closest to peak |
|     | 20.0       | 9.08       | <i>D18Mit36</i>  |         |                    |                        |
| 18  | 57.5       | 1.75       | <i>D18Mit6</i>   | B6xCAST | Femoral vBMD       | Peak shape             |
|     | 54.0       | 1.94       |                  |         |                    |                        |
| 19  | 29.8       | 2.44       | <i>D19Mit11</i>  | NZBxSM  | Vertebral aBMD     | Peak shape             |
|     | 27.0       | 2.68       |                  |         |                    |                        |

\* The top value is the result from the new map and the bottom from the traditional map analysis.

\*\* LOD change resulted in a failure to detect QTL in one analysis
